# Supplementary material for: Distribution, Characteristics, and Regulatory Potential of Long Noncoding RNAs in Brown-Rot Fungi
Source: Int J Genomics. 2019 May 2;2019:9702342. doi: 10.1155/2019/9702342 (PMC6525899; doi:10.1155/2019/9702342)
Supplement: Supplementary 1 — Dataset S1: annotation of lncRNAs in C. puteana. [file 9702342.f1.gff3]

scaffold_1	Conpu1	exon	9149	9461	99	-	.	ID=TRINITY_DN3066_c2_g1_i1.mrna1.exon1;Name=TRINITY_DN3066_c2_g1_i1;Parent=TRINITY_DN3066_c2_g1_i1.mrna1;Target=TRINITY_DN3066_c2_g1_i1 313 1 .
scaffold_1	Conpu1	gene	9149	9461	.	-	.	ID=TRINITY_DN3066_c2_g1_i1.path1;Name=TRINITY_DN3066_c2_g1_i1
scaffold_1	Conpu1	mRNA	9149	9461	.	-	.	ID=TRINITY_DN3066_c2_g1_i1.mrna1;Name=TRINITY_DN3066_c2_g1_i1;Parent=TRINITY_DN3066_c2_g1_i1.path1;coverage=100.0;identity=99.7;matches=312;mismatches=1;indels=0;unknowns=0
scaffold_1	Conpu1	CDS	9237	9461	100	-	0	ID=TRINITY_DN3066_c2_g1_i1.mrna1.cds1;Name=TRINITY_DN3066_c2_g1_i1;Parent=TRINITY_DN3066_c2_g1_i1.mrna1;Target=TRINITY_DN3066_c2_g1_i1 225 1 .
scaffold_1	Conpu1	CDS	23595	23618	100	-	0	ID=TRINITY_DN15463_c0_g1_i1.mrna1.cds3;Name=TRINITY_DN15463_c0_g1_i1;Parent=TRINITY_DN15463_c0_g1_i1.mrna1;Target=TRINITY_DN15463_c0_g1_i1 1 24 .
scaffold_1	Conpu1	exon	23595	23618	100	-	.	ID=TRINITY_DN15463_c0_g1_i1.mrna1.exon3;Name=TRINITY_DN15463_c0_g1_i1;Parent=TRINITY_DN15463_c0_g1_i1.mrna1;Target=TRINITY_DN15463_c0_g1_i1 1 24 -
scaffold_1	Conpu1	gene	23595	24001	.	-	.	ID=TRINITY_DN15463_c0_g1_i1.path1;Name=TRINITY_DN15463_c0_g1_i1
scaffold_1	Conpu1	mRNA	23595	24001	.	-	.	ID=TRINITY_DN15463_c0_g1_i1.mrna1;Name=TRINITY_DN15463_c0_g1_i1;Parent=TRINITY_DN15463_c0_g1_i1.path1;coverage=100.0;identity=100.0;matches=291;mismatches=0;indels=0;unknowns=0
scaffold_1	Conpu1	CDS	23676	23748	100	-	2	ID=TRINITY_DN15463_c0_g1_i1.mrna1.cds2;Name=TRINITY_DN15463_c0_g1_i1;Parent=TRINITY_DN15463_c0_g1_i1.mrna1;Target=TRINITY_DN15463_c0_g1_i1 25 97 .
scaffold_1	Conpu1	exon	23676	23748	100	-	.	ID=TRINITY_DN15463_c0_g1_i1.mrna1.exon2;Name=TRINITY_DN15463_c0_g1_i1;Parent=TRINITY_DN15463_c0_g1_i1.mrna1;Target=TRINITY_DN15463_c0_g1_i1 25 97 -
scaffold_1	Conpu1	CDS	23808	24001	100	-	0	ID=TRINITY_DN15463_c0_g1_i1.mrna1.cds1;Name=TRINITY_DN15463_c0_g1_i1;Parent=TRINITY_DN15463_c0_g1_i1.mrna1;Target=TRINITY_DN15463_c0_g1_i1 98 291 .
scaffold_1	Conpu1	exon	23808	24001	100	-	.	ID=TRINITY_DN15463_c0_g1_i1.mrna1.exon1;Name=TRINITY_DN15463_c0_g1_i1;Parent=TRINITY_DN15463_c0_g1_i1.mrna1;Target=TRINITY_DN15463_c0_g1_i1 98 291 -
scaffold_1	Conpu1	exon	25365	25572	100	-	.	ID=TRINITY_DN9548_c0_g1_i1.mrna1.exon1;Name=TRINITY_DN9548_c0_g1_i1;Parent=TRINITY_DN9548_c0_g1_i1.mrna1;Target=TRINITY_DN9548_c0_g1_i1 208 1 .
scaffold_1	Conpu1	gene	25365	25572	.	-	.	ID=TRINITY_DN9548_c0_g1_i1.path1;Name=TRINITY_DN9548_c0_g1_i1
scaffold_1	Conpu1	mRNA	25365	25572	.	-	.	ID=TRINITY_DN9548_c0_g1_i1.mrna1;Name=TRINITY_DN9548_c0_g1_i1;Parent=TRINITY_DN9548_c0_g1_i1.path1;coverage=100.0;identity=100.0;matches=208;mismatches=0;indels=0;unknowns=0
scaffold_1	Conpu1	CDS	25367	25480	100	-	0	ID=TRINITY_DN9548_c0_g1_i1.mrna1.cds1;Name=TRINITY_DN9548_c0_g1_i1;Parent=TRINITY_DN9548_c0_g1_i1.mrna1;Target=TRINITY_DN9548_c0_g1_i1 206 93 .
scaffold_1	Conpu1	exon	55412	55644	100	-	.	ID=TRINITY_DN9952_c0_g1_i1.mrna1.exon1;Name=TRINITY_DN9952_c0_g1_i1;Parent=TRINITY_DN9952_c0_g1_i1.mrna1;Target=TRINITY_DN9952_c0_g1_i1 233 1 .
scaffold_1	Conpu1	gene	55412	55644	.	-	.	ID=TRINITY_DN9952_c0_g1_i1.path1;Name=TRINITY_DN9952_c0_g1_i1
scaffold_1	Conpu1	mRNA	55412	55644	.	-	.	ID=TRINITY_DN9952_c0_g1_i1.mrna1;Name=TRINITY_DN9952_c0_g1_i1;Parent=TRINITY_DN9952_c0_g1_i1.path1;coverage=100.0;identity=100.0;matches=233;mismatches=0;indels=0;unknowns=0
scaffold_1	Conpu1	CDS	55569	55643	100	-	0	ID=TRINITY_DN9952_c0_g1_i1.mrna1.cds1;Name=TRINITY_DN9952_c0_g1_i1;Parent=TRINITY_DN9952_c0_g1_i1.mrna1;Target=TRINITY_DN9952_c0_g1_i1 76 2 .
scaffold_1	Conpu1	exon	55659	55756	100	-	.	ID=TRINITY_DN16477_c0_g1_i1.mrna1.exon3;Name=TRINITY_DN16477_c0_g1_i1;Parent=TRINITY_DN16477_c0_g1_i1.mrna1;Target=TRINITY_DN16477_c0_g1_i1 228 325 +
scaffold_1	Conpu1	gene	55659	56122	.	-	.	ID=TRINITY_DN16477_c0_g1_i1.path1;Name=TRINITY_DN16477_c0_g1_i1
scaffold_1	Conpu1	mRNA	55659	56122	.	-	.	ID=TRINITY_DN16477_c0_g1_i1.mrna1;Name=TRINITY_DN16477_c0_g1_i1;Parent=TRINITY_DN16477_c0_g1_i1.path1;coverage=100.0;identity=100.0;matches=325;mismatches=0;indels=0;unknowns=0
scaffold_1	Conpu1	exon	55842	55998	100	-	.	ID=TRINITY_DN16477_c0_g1_i1.mrna1.exon2;Name=TRINITY_DN16477_c0_g1_i1;Parent=TRINITY_DN16477_c0_g1_i1.mrna1;Target=TRINITY_DN16477_c0_g1_i1 71 227 +
scaffold_1	Conpu1	CDS	55965	55998	100	-	2	ID=TRINITY_DN16477_c0_g1_i1.mrna1.cds2;Name=TRINITY_DN16477_c0_g1_i1;Parent=TRINITY_DN16477_c0_g1_i1.mrna1;Target=TRINITY_DN16477_c0_g1_i1 71 104 +
scaffold_1	Conpu1	CDS	56053	56120	100	-	0	ID=TRINITY_DN16477_c0_g1_i1.mrna1.cds1;Name=TRINITY_DN16477_c0_g1_i1;Parent=TRINITY_DN16477_c0_g1_i1.mrna1;Target=TRINITY_DN16477_c0_g1_i1 3 70 +
scaffold_1	Conpu1	exon	56053	56122	100	-	.	ID=TRINITY_DN16477_c0_g1_i1.mrna1.exon1;Name=TRINITY_DN16477_c0_g1_i1;Parent=TRINITY_DN16477_c0_g1_i1.mrna1;Target=TRINITY_DN16477_c0_g1_i1 1 70 +
scaffold_1	Conpu1	exon	58361	58634	100	-	.	ID=TRINITY_DN8254_c0_g1_i1.mrna1.exon2;Name=TRINITY_DN8254_c0_g1_i1;Parent=TRINITY_DN8254_c0_g1_i1.mrna1;Target=TRINITY_DN8254_c0_g1_i1 192 465 +
scaffold_1	Conpu1	gene	58361	58882	.	-	.	ID=TRINITY_DN8254_c0_g1_i1.path1;Name=TRINITY_DN8254_c0_g1_i1
scaffold_1	Conpu1	mRNA	58361	58882	.	-	.	ID=TRINITY_DN8254_c0_g1_i1.mrna1;Name=TRINITY_DN8254_c0_g1_i1;Parent=TRINITY_DN8254_c0_g1_i1.path1;coverage=100.0;identity=100.0;matches=465;mismatches=0;indels=0;unknowns=0
scaffold_1	Conpu1	exon	58692	58882	100	-	.	ID=TRINITY_DN8254_c0_g1_i1.mrna1.exon1;Name=TRINITY_DN8254_c0_g1_i1;Parent=TRINITY_DN8254_c0_g1_i1.mrna1;Target=TRINITY_DN8254_c0_g1_i1 1 191 +
scaffold_1	Conpu1	CDS	58722	58880	100	-	0	ID=TRINITY_DN8254_c0_g1_i1.mrna1.cds1;Name=TRINITY_DN8254_c0_g1_i1;Parent=TRINITY_DN8254_c0_g1_i1.mrna1;Target=TRINITY_DN8254_c0_g1_i1 3 161 +
scaffold_1	Conpu1	exon	58837	59059	100	+	.	ID=TRINITY_DN9212_c0_g1_i1.mrna1.exon1;Name=TRINITY_DN9212_c0_g1_i1;Parent=TRINITY_DN9212_c0_g1_i1.mrna1;Target=TRINITY_DN9212_c0_g1_i1 223 1 .
scaffold_1	Conpu1	gene	58837	59059	.	+	.	ID=TRINITY_DN9212_c0_g1_i1.path1;Name=TRINITY_DN9212_c0_g1_i1
scaffold_1	Conpu1	mRNA	58837	59059	.	+	.	ID=TRINITY_DN9212_c0_g1_i1.mrna1;Name=TRINITY_DN9212_c0_g1_i1;Parent=TRINITY_DN9212_c0_g1_i1.path1;coverage=100.0;identity=100.0;matches=223;mismatches=0;indels=0;unknowns=0
scaffold_1	Conpu1	CDS	58839	59057	100	+	0	ID=TRINITY_DN9212_c0_g1_i1.mrna1.cds1;Name=TRINITY_DN9212_c0_g1_i1;Parent=TRINITY_DN9212_c0_g1_i1.mrna1;Target=TRINITY_DN9212_c0_g1_i1 221 3 .
scaffold_1	Conpu1	exon	58848	58869	100	-	.	ID=TRINITY_DN8254_c1_g1_i1.mrna1.exon3;Name=TRINITY_DN8254_c1_g1_i1;Parent=TRINITY_DN8254_c1_g1_i1.mrna1;Target=TRINITY_DN8254_c1_g1_i1 1 22 -
scaffold_1	Conpu1	gene	58848	59455	.	-	.	ID=TRINITY_DN8254_c1_g1_i1.path1;Name=TRINITY_DN8254_c1_g1_i1
scaffold_1	Conpu1	mRNA	58848	59455	.	-	.	ID=TRINITY_DN8254_c1_g1_i1.mrna1;Name=TRINITY_DN8254_c1_g1_i1;Parent=TRINITY_DN8254_c1_g1_i1.path1;coverage=100.0;identity=100.0;matches=346;mismatches=0;indels=0;unknowns=0
scaffold_1	Conpu1	exon	59045	59165	100	-	.	ID=TRINITY_DN8254_c1_g1_i1.mrna1.exon2;Name=TRINITY_DN8254_c1_g1_i1;Parent=TRINITY_DN8254_c1_g1_i1.mrna1;Target=TRINITY_DN8254_c1_g1_i1 23 143 -
scaffold_1	Conpu1	CDS	59121	59165	100	-	0	ID=TRINITY_DN8254_c1_g1_i1.mrna1.cds2;Name=TRINITY_DN8254_c1_g1_i1;Parent=TRINITY_DN8254_c1_g1_i1.mrna1;Target=TRINITY_DN8254_c1_g1_i1 99 143 .
scaffold_1	Conpu1	CDS	59253	59378	100	-	0	ID=TRINITY_DN8254_c1_g1_i1.mrna1.cds1;Name=TRINITY_DN8254_c1_g1_i1;Parent=TRINITY_DN8254_c1_g1_i1.mrna1;Target=TRINITY_DN8254_c1_g1_i1 144 269 .
scaffold_1	Conpu1	exon	59253	59455	100	-	.	ID=TRINITY_DN8254_c1_g1_i1.mrna1.exon1;Name=TRINITY_DN8254_c1_g1_i1;Parent=TRINITY_DN8254_c1_g1_i1.mrna1;Target=TRINITY_DN8254_c1_g1_i1 144 346 -
scaffold_1	Conpu1	exon	59434	59752	100	-	.	ID=TRINITY_DN9017_c0_g1_i1.mrna1.exon2;Name=TRINITY_DN9017_c0_g1_i1;Parent=TRINITY_DN9017_c0_g1_i1.mrna1;Target=TRINITY_DN9017_c0_g1_i1 375 57 .
scaffold_1	Conpu1	gene	59434	59861	.	-	.	ID=TRINITY_DN9017_c0_g1_i1.path1;Name=TRINITY_DN9017_c0_g1_i1
scaffold_1	Conpu1	mRNA	59434	59861	.	-	.	ID=TRINITY_DN9017_c0_g1_i1.mrna1;Name=TRINITY_DN9017_c0_g1_i1;Parent=TRINITY_DN9017_c0_g1_i1.path1;coverage=100.0;identity=100.0;matches=375;mismatches=0;indels=0;unknowns=0
scaffold_1	Conpu1	CDS	59476	59586	100	-	0	ID=TRINITY_DN9017_c0_g1_i1.mrna1.cds1;Name=TRINITY_DN9017_c0_g1_i1;Parent=TRINITY_DN9017_c0_g1_i1.mrna1;Target=TRINITY_DN9017_c0_g1_i1 333 223 .
scaffold_1	Conpu1	exon	59806	59861	100	-	.	ID=TRINITY_DN9017_c0_g1_i1.mrna1.exon1;Name=TRINITY_DN9017_c0_g1_i1;Parent=TRINITY_DN9017_c0_g1_i1.mrna1;Target=TRINITY_DN9017_c0_g1_i1 56 1 .
scaffold_1	Conpu1	exon	59980	60117	100	+	.	ID=TRINITY_DN6346_c0_g1_i1.mrna1.exon1;Name=TRINITY_DN6346_c0_g1_i1;Parent=TRINITY_DN6346_c0_g1_i1.mrna1;Target=TRINITY_DN6346_c0_g1_i1 1 138 +
scaffold_1	Conpu1	gene	59980	60477	.	+	.	ID=TRINITY_DN6346_c0_g1_i1.path1;Name=TRINITY_DN6346_c0_g1_i1
scaffold_1	Conpu1	mRNA	59980	60477	.	+	.	ID=TRINITY_DN6346_c0_g1_i1.mrna1;Name=TRINITY_DN6346_c0_g1_i1;Parent=TRINITY_DN6346_c0_g1_i1.path1;coverage=100.0;identity=100.0;matches=329;mismatches=0;indels=0;unknowns=0
scaffold_1	Conpu1	exon	60178	60181	100	+	.	ID=TRINITY_DN6346_c0_g1_i1.mrna1.exon2;Name=TRINITY_DN6346_c0_g1_i1;Parent=TRINITY_DN6346_c0_g1_i1.mrna1;Target=TRINITY_DN6346_c0_g1_i1 139 142 +
scaffold_1	Conpu1	exon	60231	60293	100	+	.	ID=TRINITY_DN6346_c0_g1_i1.mrna1.exon3;Name=TRINITY_DN6346_c0_g1_i1;Parent=TRINITY_DN6346_c0_g1_i1.mrna1;Target=TRINITY_DN6346_c0_g1_i1 143 205 +
scaffold_1	Conpu1	CDS	60250	60293	100	+	0	ID=TRINITY_DN6346_c0_g1_i1.mrna1.cds1;Name=TRINITY_DN6346_c0_g1_i1;Parent=TRINITY_DN6346_c0_g1_i1.mrna1;Target=TRINITY_DN6346_c0_g1_i1 162 205 +
scaffold_1	Conpu1	CDS	60354	60477	100	+	2	ID=TRINITY_DN6346_c0_g1_i1.mrna1.cds2;Name=TRINITY_DN6346_c0_g1_i1;Parent=TRINITY_DN6346_c0_g1_i1.mrna1;Target=TRINITY_DN6346_c0_g1_i1 206 329 +
scaffold_1	Conpu1	exon	60354	60477	100	+	.	ID=TRINITY_DN6346_c0_g1_i1.mrna1.exon4;Name=TRINITY_DN6346_c0_g1_i1;Parent=TRINITY_DN6346_c0_g1_i1.mrna1;Target=TRINITY_DN6346_c0_g1_i1 206 329 +
scaffold_1	Conpu1	exon	78199	78441	100	-	.	ID=TRINITY_DN9790_c0_g1_i1.mrna1.exon1;Name=TRINITY_DN9790_c0_g1_i1;Parent=TRINITY_DN9790_c0_g1_i1.mrna1;Target=TRINITY_DN9790_c0_g1_i1 243 1 .
scaffold_1	Conpu1	gene	78199	78441	.	-	.	ID=TRINITY_DN9790_c0_g1_i1.path1;Name=TRINITY_DN9790_c0_g1_i1
scaffold_1	Conpu1	mRNA	78199	78441	.	-	.	ID=TRINITY_DN9790_c0_g1_i1.mrna1;Name=TRINITY_DN9790_c0_g1_i1;Parent=TRINITY_DN9790_c0_g1_i1.path1;coverage=100.0;identity=100.0;matches=243;mismatches=0;indels=0;unknowns=0
scaffold_1	Conpu1	CDS	78343	78441	100	-	0	ID=TRINITY_DN9790_c0_g1_i1.mrna1.cds1;Name=TRINITY_DN9790_c0_g1_i1;Parent=TRINITY_DN9790_c0_g1_i1.mrna1;Target=TRINITY_DN9790_c0_g1_i1 99 1 .
scaffold_1	Conpu1	exon	84059	84098	100	+	.	ID=TRINITY_DN4730_c0_g1_i1.mrna1.exon1;Name=TRINITY_DN4730_c0_g1_i1;Parent=TRINITY_DN4730_c0_g1_i1.mrna1;Target=TRINITY_DN4730_c0_g1_i1 365 404 -
scaffold_1	Conpu1	gene	84059	84518	.	+	.	ID=TRINITY_DN4730_c0_g1_i1.path1;Name=TRINITY_DN4730_c0_g1_i1
scaffold_1	Conpu1	mRNA	84059	84518	.	+	.	ID=TRINITY_DN4730_c0_g1_i1.mrna1;Name=TRINITY_DN4730_c0_g1_i1;Parent=TRINITY_DN4730_c0_g1_i1.path1;coverage=100.0;identity=100.0;matches=404;mismatches=0;indels=0;unknowns=0
scaffold_1	Conpu1	exon	84155	84518	100	+	.	ID=TRINITY_DN4730_c0_g1_i1.mrna1.exon2;Name=TRINITY_DN4730_c0_g1_i1;Parent=TRINITY_DN4730_c0_g1_i1.mrna1;Target=TRINITY_DN4730_c0_g1_i1 1 364 -
scaffold_1	Conpu1	CDS	84277	84516	100	+	0	ID=TRINITY_DN4730_c0_g1_i1.mrna1.cds1;Name=TRINITY_DN4730_c0_g1_i1;Parent=TRINITY_DN4730_c0_g1_i1.mrna1;Target=TRINITY_DN4730_c0_g1_i1 3 242 .
scaffold_1	Conpu1	exon	158647	158798	100	+	.	ID=TRINITY_DN12245_c0_g1_i1.mrna1.exon1;Name=TRINITY_DN12245_c0_g1_i1;Parent=TRINITY_DN12245_c0_g1_i1.mrna1;Target=TRINITY_DN12245_c0_g1_i1 1 152 +
scaffold_1	Conpu1	gene	158647	158930	.	+	.	ID=TRINITY_DN12245_c0_g1_i1.path1;Name=TRINITY_DN12245_c0_g1_i1
scaffold_1	Conpu1	mRNA	158647	158930	.	+	.	ID=TRINITY_DN12245_c0_g1_i1.mrna1;Name=TRINITY_DN12245_c0_g1_i1;Parent=TRINITY_DN12245_c0_g1_i1.path1;coverage=100.0;identity=100.0;matches=232;mismatches=0;indels=0;unknowns=0
scaffold_1	Conpu1	CDS	158648	158794	100	+	0	ID=TRINITY_DN12245_c0_g1_i1.mrna1.cds1;Name=TRINITY_DN12245_c0_g1_i1;Parent=TRINITY_DN12245_c0_g1_i1.mrna1;Target=TRINITY_DN12245_c0_g1_i1 2 148 +
scaffold_1	Conpu1	exon	158851	158930	100	+	.	ID=TRINITY_DN12245_c0_g1_i1.mrna1.exon2;Name=TRINITY_DN12245_c0_g1_i1;Parent=TRINITY_DN12245_c0_g1_i1.mrna1;Target=TRINITY_DN12245_c0_g1_i1 153 232 +
scaffold_1	Conpu1	CDS	158909	159001	100	+	0	ID=TRINITY_DN507_c0_g1_i1.mrna1.cds1;Name=TRINITY_DN507_c0_g1_i1;Parent=TRINITY_DN507_c0_g1_i1.mrna1;Target=TRINITY_DN507_c0_g1_i1 598 690 .
scaffold_1	Conpu1	exon	158909	159001	100	+	.	ID=TRINITY_DN507_c0_g1_i1.mrna1.exon1;Name=TRINITY_DN507_c0_g1_i1;Parent=TRINITY_DN507_c0_g1_i1.mrna1;Target=TRINITY_DN507_c0_g1_i1 598 690 -
scaffold_1	Conpu1	gene	158909	159652	.	+	.	ID=TRINITY_DN507_c0_g1_i1.path1;Name=TRINITY_DN507_c0_g1_i1
scaffold_1	Conpu1	mRNA	158909	159652	.	+	.	ID=TRINITY_DN507_c0_g1_i1.mrna1;Name=TRINITY_DN507_c0_g1_i1;Parent=TRINITY_DN507_c0_g1_i1.path1;coverage=100.0;identity=100.0;matches=690;mismatches=0;indels=0;unknowns=0
scaffold_1	Conpu1	CDS	159056	159184	100	+	0	ID=TRINITY_DN507_c0_g1_i1.mrna1.cds2;Name=TRINITY_DN507_c0_g1_i1;Parent=TRINITY_DN507_c0_g1_i1.mrna1;Target=TRINITY_DN507_c0_g1_i1 469 597 .
scaffold_1	Conpu1	exon	159056	159652	100	+	.	ID=TRINITY_DN507_c0_g1_i1.mrna1.exon2;Name=TRINITY_DN507_c0_g1_i1;Parent=TRINITY_DN507_c0_g1_i1.mrna1;Target=TRINITY_DN507_c0_g1_i1 1 597 -
scaffold_1	Conpu1	exon	159732	160024	99	+	.	ID=TRINITY_DN16145_c0_g1_i1.mrna1.exon1;Name=TRINITY_DN16145_c0_g1_i1;Parent=TRINITY_DN16145_c0_g1_i1.mrna1;Target=TRINITY_DN16145_c0_g1_i1 293 1 .
scaffold_1	Conpu1	gene	159732	160024	.	+	.	ID=TRINITY_DN16145_c0_g1_i1.path1;Name=TRINITY_DN16145_c0_g1_i1
scaffold_1	Conpu1	mRNA	159732	160024	.	+	.	ID=TRINITY_DN16145_c0_g1_i1.mrna1;Name=TRINITY_DN16145_c0_g1_i1;Parent=TRINITY_DN16145_c0_g1_i1.path1;coverage=100.0;identity=99.7;matches=292;mismatches=1;indels=0;unknowns=0
scaffold_1	Conpu1	CDS	159733	159867	100	+	0	ID=TRINITY_DN16145_c0_g1_i1.mrna1.cds1;Name=TRINITY_DN16145_c0_g1_i1;Parent=TRINITY_DN16145_c0_g1_i1.mrna1;Target=TRINITY_DN16145_c0_g1_i1 136 2 .
scaffold_1	Conpu1	exon	179531	179766	100	-	.	ID=TRINITY_DN8304_c0_g1_i1.mrna1.exon2;Name=TRINITY_DN8304_c0_g1_i1;Parent=TRINITY_DN8304_c0_g1_i1.mrna1;Target=TRINITY_DN8304_c0_g1_i1 1 236 -
scaffold_1	Conpu1	gene	179531	179962	.	-	.	ID=TRINITY_DN8304_c0_g1_i1.path1;Name=TRINITY_DN8304_c0_g1_i1
scaffold_1	Conpu1	mRNA	179531	179962	.	-	.	ID=TRINITY_DN8304_c0_g1_i1.mrna1;Name=TRINITY_DN8304_c0_g1_i1;Parent=TRINITY_DN8304_c0_g1_i1.path1;coverage=100.0;identity=100.0;matches=359;mismatches=0;indels=0;unknowns=0
scaffold_1	Conpu1	CDS	179756	179766	100	-	1	ID=TRINITY_DN8304_c0_g1_i1.mrna1.cds2;Name=TRINITY_DN8304_c0_g1_i1;Parent=TRINITY_DN8304_c0_g1_i1.mrna1;Target=TRINITY_DN8304_c0_g1_i1 226 236 .
scaffold_1	Conpu1	CDS	179840	179960	100	-	0	ID=TRINITY_DN8304_c0_g1_i1.mrna1.cds1;Name=TRINITY_DN8304_c0_g1_i1;Parent=TRINITY_DN8304_c0_g1_i1.mrna1;Target=TRINITY_DN8304_c0_g1_i1 237 357 .
scaffold_1	Conpu1	exon	179840	179962	100	-	.	ID=TRINITY_DN8304_c0_g1_i1.mrna1.exon1;Name=TRINITY_DN8304_c0_g1_i1;Parent=TRINITY_DN8304_c0_g1_i1.mrna1;Target=TRINITY_DN8304_c0_g1_i1 237 359 -
scaffold_1	Conpu1	exon	180082	180100	100	-	.	ID=TRINITY_DN8271_c0_g1_i1.mrna1.exon2;Name=TRINITY_DN8271_c0_g1_i1;Parent=TRINITY_DN8271_c0_g1_i1.mrna1;Target=TRINITY_DN8271_c0_g1_i1 235 253 +
scaffold_1	Conpu1	gene	180082	180420	.	-	.	ID=TRINITY_DN8271_c0_g1_i1.path1;Name=TRINITY_DN8271_c0_g1_i1
scaffold_1	Conpu1	mRNA	180082	180420	.	-	.	ID=TRINITY_DN8271_c0_g1_i1.mrna1;Name=TRINITY_DN8271_c0_g1_i1;Parent=TRINITY_DN8271_c0_g1_i1.path1;coverage=100.0;identity=100.0;matches=253;mismatches=0;indels=0;unknowns=0
scaffold_1	Conpu1	exon	180187	180420	100	-	.	ID=TRINITY_DN8271_c0_g1_i1.mrna1.exon1;Name=TRINITY_DN8271_c0_g1_i1;Parent=TRINITY_DN8271_c0_g1_i1.mrna1;Target=TRINITY_DN8271_c0_g1_i1 1 234 +
scaffold_1	Conpu1	CDS	180262	180420	100	-	0	ID=TRINITY_DN8271_c0_g1_i1.mrna1.cds1;Name=TRINITY_DN8271_c0_g1_i1;Parent=TRINITY_DN8271_c0_g1_i1.mrna1;Target=TRINITY_DN8271_c0_g1_i1 1 159 +
scaffold_1	Conpu1	exon	198043	198193	100	-	.	ID=TRINITY_DN9536_c0_g1_i1.mrna1.exon2;Name=TRINITY_DN9536_c0_g1_i1;Parent=TRINITY_DN9536_c0_g1_i1.mrna1;Target=TRINITY_DN9536_c0_g1_i1 1 151 -
scaffold_1	Conpu1	gene	198043	198596	.	-	.	ID=TRINITY_DN9536_c0_g1_i1.path1;Name=TRINITY_DN9536_c0_g1_i1
scaffold_1	Conpu1	mRNA	198043	198596	.	-	.	ID=TRINITY_DN9536_c0_g1_i1.mrna1;Name=TRINITY_DN9536_c0_g1_i1;Parent=TRINITY_DN9536_c0_g1_i1.path1;coverage=100.0;identity=100.0;matches=494;mismatches=0;indels=0;unknowns=0
scaffold_1	Conpu1	CDS	198077	198193	100	-	0	ID=TRINITY_DN9536_c0_g1_i1.mrna1.cds2;Name=TRINITY_DN9536_c0_g1_i1;Parent=TRINITY_DN9536_c0_g1_i1.mrna1;Target=TRINITY_DN9536_c0_g1_i1 35 151 .
scaffold_1	Conpu1	CDS	198254	198331	100	-	0	ID=TRINITY_DN9536_c0_g1_i1.mrna1.cds1;Name=TRINITY_DN9536_c0_g1_i1;Parent=TRINITY_DN9536_c0_g1_i1.mrna1;Target=TRINITY_DN9536_c0_g1_i1 152 229 .
scaffold_1	Conpu1	exon	198254	198596	100	-	.	ID=TRINITY_DN9536_c0_g1_i1.mrna1.exon1;Name=TRINITY_DN9536_c0_g1_i1;Parent=TRINITY_DN9536_c0_g1_i1.mrna1;Target=TRINITY_DN9536_c0_g1_i1 152 494 -
scaffold_1	Conpu1	exon	202476	202682	100	-	.	ID=TRINITY_DN13520_c0_g1_i1.mrna1.exon1;Name=TRINITY_DN13520_c0_g1_i1;Parent=TRINITY_DN13520_c0_g1_i1.mrna1;Target=TRINITY_DN13520_c0_g1_i1 207 1 .
scaffold_1	Conpu1	gene	202476	202682	.	-	.	ID=TRINITY_DN13520_c0_g1_i1.path1;Name=TRINITY_DN13520_c0_g1_i1
scaffold_1	Conpu1	mRNA	202476	202682	.	-	.	ID=TRINITY_DN13520_c0_g1_i1.mrna1;Name=TRINITY_DN13520_c0_g1_i1;Parent=TRINITY_DN13520_c0_g1_i1.path1;coverage=100.0;identity=100.0;matches=207;mismatches=0;indels=0;unknowns=0
scaffold_1	Conpu1	CDS	202478	202681	100	-	0	ID=TRINITY_DN13520_c0_g1_i1.mrna1.cds1;Name=TRINITY_DN13520_c0_g1_i1;Parent=TRINITY_DN13520_c0_g1_i1.mrna1;Target=TRINITY_DN13520_c0_g1_i1 205 2 .
scaffold_1	Conpu1	CDS	203711	203787	100	+	0	ID=TRINITY_DN7402_c0_g1_i1.mrna1.cds1;Name=TRINITY_DN7402_c0_g1_i1;Parent=TRINITY_DN7402_c0_g1_i1.mrna1;Target=TRINITY_DN7402_c0_g1_i1 144 220 .
scaffold_1	Conpu1	exon	203711	203787	100	+	.	ID=TRINITY_DN7402_c0_g1_i1.mrna1.exon1;Name=TRINITY_DN7402_c0_g1_i1;Parent=TRINITY_DN7402_c0_g1_i1.mrna1;Target=TRINITY_DN7402_c0_g1_i1 144 220 -
scaffold_1	Conpu1	gene	203711	203984	.	+	.	ID=TRINITY_DN7402_c0_g1_i1.path1;Name=TRINITY_DN7402_c0_g1_i1
scaffold_1	Conpu1	mRNA	203711	203984	.	+	.	ID=TRINITY_DN7402_c0_g1_i1.mrna1;Name=TRINITY_DN7402_c0_g1_i1;Parent=TRINITY_DN7402_c0_g1_i1.path1;coverage=100.0;identity=100.0;matches=220;mismatches=0;indels=0;unknowns=0
scaffold_1	Conpu1	CDS	203842	203983	100	+	2	ID=TRINITY_DN7402_c0_g1_i1.mrna1.cds2;Name=TRINITY_DN7402_c0_g1_i1;Parent=TRINITY_DN7402_c0_g1_i1.mrna1;Target=TRINITY_DN7402_c0_g1_i1 2 143 .
scaffold_1	Conpu1	exon	203842	203984	100	+	.	ID=TRINITY_DN7402_c0_g1_i1.mrna1.exon2;Name=TRINITY_DN7402_c0_g1_i1;Parent=TRINITY_DN7402_c0_g1_i1.mrna1;Target=TRINITY_DN7402_c0_g1_i1 1 143 -
scaffold_1	Conpu1	exon	231344	231615	100	+	.	ID=TRINITY_DN12733_c0_g1_i1.mrna1.exon1;Name=TRINITY_DN12733_c0_g1_i1;Parent=TRINITY_DN12733_c0_g1_i1.mrna1;Target=TRINITY_DN12733_c0_g1_i1 286 15 .
scaffold_1	Conpu1	gene	231344	231615	.	+	.	ID=TRINITY_DN12733_c0_g1_i1.path1;Name=TRINITY_DN12733_c0_g1_i1
scaffold_1	Conpu1	mRNA	231344	231615	.	+	.	ID=TRINITY_DN12733_c0_g1_i1.mrna1;Name=TRINITY_DN12733_c0_g1_i1;Parent=TRINITY_DN12733_c0_g1_i1.path1;coverage=95.1;identity=100.0;matches=272;mismatches=0;indels=0;unknowns=0
scaffold_1	Conpu1	CDS	231498	231590	100	+	0	ID=TRINITY_DN12733_c0_g1_i1.mrna1.cds1;Name=TRINITY_DN12733_c0_g1_i1;Parent=TRINITY_DN12733_c0_g1_i1.mrna1;Target=TRINITY_DN12733_c0_g1_i1 261 169 .
scaffold_1	Conpu1	exon	239780	240002	100	-	.	ID=TRINITY_DN1833_c0_g1_i2.mrna1.exon5;Name=TRINITY_DN1833_c0_g1_i2;Parent=TRINITY_DN1833_c0_g1_i2.mrna1;Target=TRINITY_DN1833_c0_g1_i2 1178 1400 +
scaffold_1	Conpu1	exon	239780	240179	100	-	.	ID=TRINITY_DN1833_c0_g1_i1.mrna1.exon4;Name=TRINITY_DN1833_c0_g1_i1;Parent=TRINITY_DN1833_c0_g1_i1.mrna1;Target=TRINITY_DN1833_c0_g1_i1 1053 1452 +
scaffold_1	Conpu1	gene	239780	241410	.	-	.	ID=TRINITY_DN1833_c0_g1_i1.path1;Name=TRINITY_DN1833_c0_g1_i1
scaffold_1	Conpu1	gene	239780	241410	.	-	.	ID=TRINITY_DN1833_c0_g1_i2.path1;Name=TRINITY_DN1833_c0_g1_i2
scaffold_1	Conpu1	mRNA	239780	241410	.	-	.	ID=TRINITY_DN1833_c0_g1_i1.mrna1;Name=TRINITY_DN1833_c0_g1_i1;Parent=TRINITY_DN1833_c0_g1_i1.path1;coverage=100.0;identity=100.0;matches=1452;mismatches=0;indels=0;unknowns=0
scaffold_1	Conpu1	mRNA	239780	241410	.	-	.	ID=TRINITY_DN1833_c0_g1_i2.mrna1;Name=TRINITY_DN1833_c0_g1_i2;Parent=TRINITY_DN1833_c0_g1_i2.path1;coverage=100.0;identity=100.0;matches=1400;mismatches=0;indels=0;unknowns=0
scaffold_1	Conpu1	CDS	239781	240065	100	-	0	ID=TRINITY_DN1833_c0_g1_i1.mrna1.cds1;Name=TRINITY_DN1833_c0_g1_i1;Parent=TRINITY_DN1833_c0_g1_i1.mrna1;Target=TRINITY_DN1833_c0_g1_i1 1167 1451 +
scaffold_1	Conpu1	exon	240055	240179	100	-	.	ID=TRINITY_DN1833_c0_g1_i2.mrna1.exon4;Name=TRINITY_DN1833_c0_g1_i2;Parent=TRINITY_DN1833_c0_g1_i2.mrna1;Target=TRINITY_DN1833_c0_g1_i2 1053 1177 +
scaffold_1	Conpu1	exon	240237	240352	100	-	.	ID=TRINITY_DN1833_c0_g1_i1.mrna1.exon3;Name=TRINITY_DN1833_c0_g1_i1;Parent=TRINITY_DN1833_c0_g1_i1.mrna1;Target=TRINITY_DN1833_c0_g1_i1 937 1052 +
scaffold_1	Conpu1	exon	240237	240352	100	-	.	ID=TRINITY_DN1833_c0_g1_i2.mrna1.exon3;Name=TRINITY_DN1833_c0_g1_i2;Parent=TRINITY_DN1833_c0_g1_i2.mrna1;Target=TRINITY_DN1833_c0_g1_i2 937 1052 +
scaffold_1	Conpu1	exon	240425	241119	100	-	.	ID=TRINITY_DN1833_c0_g1_i1.mrna1.exon2;Name=TRINITY_DN1833_c0_g1_i1;Parent=TRINITY_DN1833_c0_g1_i1.mrna1;Target=TRINITY_DN1833_c0_g1_i1 242 936 +
scaffold_1	Conpu1	exon	240425	241119	100	-	.	ID=TRINITY_DN1833_c0_g1_i2.mrna1.exon2;Name=TRINITY_DN1833_c0_g1_i2;Parent=TRINITY_DN1833_c0_g1_i2.mrna1;Target=TRINITY_DN1833_c0_g1_i2 242 936 +
scaffold_1	Conpu1	exon	241170	241410	100	-	.	ID=TRINITY_DN1833_c0_g1_i1.mrna1.exon1;Name=TRINITY_DN1833_c0_g1_i1;Parent=TRINITY_DN1833_c0_g1_i1.mrna1;Target=TRINITY_DN1833_c0_g1_i1 1 241 +
scaffold_1	Conpu1	exon	241170	241410	100	-	.	ID=TRINITY_DN1833_c0_g1_i2.mrna1.exon1;Name=TRINITY_DN1833_c0_g1_i2;Parent=TRINITY_DN1833_c0_g1_i2.mrna1;Target=TRINITY_DN1833_c0_g1_i2 1 241 +
scaffold_1	Conpu1	CDS	241178	241408	100	-	0	ID=TRINITY_DN1833_c0_g1_i2.mrna1.cds1;Name=TRINITY_DN1833_c0_g1_i2;Parent=TRINITY_DN1833_c0_g1_i2.mrna1;Target=TRINITY_DN1833_c0_g1_i2 3 233 +
scaffold_1	Conpu1	exon	244816	245034	100	-	.	ID=TRINITY_DN14781_c0_g1_i1.mrna1.exon1;Name=TRINITY_DN14781_c0_g1_i1;Parent=TRINITY_DN14781_c0_g1_i1.mrna1;Target=TRINITY_DN14781_c0_g1_i1 219 1 .
scaffold_1	Conpu1	gene	244816	245034	.	-	.	ID=TRINITY_DN14781_c0_g1_i1.path1;Name=TRINITY_DN14781_c0_g1_i1
scaffold_1	Conpu1	mRNA	244816	245034	.	-	.	ID=TRINITY_DN14781_c0_g1_i1.mrna1;Name=TRINITY_DN14781_c0_g1_i1;Parent=TRINITY_DN14781_c0_g1_i1.path1;coverage=100.0;identity=100.0;matches=219;mismatches=0;indels=0;unknowns=0
scaffold_1	Conpu1	CDS	244922	245032	100	-	0	ID=TRINITY_DN14781_c0_g1_i1.mrna1.cds1;Name=TRINITY_DN14781_c0_g1_i1;Parent=TRINITY_DN14781_c0_g1_i1.mrna1;Target=TRINITY_DN14781_c0_g1_i1 113 3 .
scaffold_1	Conpu1	exon	250590	250840	100	-	.	ID=TRINITY_DN5285_c0_g1_i1.mrna1.exon1;Name=TRINITY_DN5285_c0_g1_i1;Parent=TRINITY_DN5285_c0_g1_i1.mrna1;Target=TRINITY_DN5285_c0_g1_i1 251 1 .
scaffold_1	Conpu1	gene	250590	250840	.	-	.	ID=TRINITY_DN5285_c0_g1_i1.path1;Name=TRINITY_DN5285_c0_g1_i1
scaffold_1	Conpu1	mRNA	250590	250840	.	-	.	ID=TRINITY_DN5285_c0_g1_i1.mrna1;Name=TRINITY_DN5285_c0_g1_i1;Parent=TRINITY_DN5285_c0_g1_i1.path1;coverage=100.0;identity=100.0;matches=251;mismatches=0;indels=0;unknowns=0
scaffold_1	Conpu1	CDS	250672	250839	100	-	0	ID=TRINITY_DN5285_c0_g1_i1.mrna1.cds1;Name=TRINITY_DN5285_c0_g1_i1;Parent=TRINITY_DN5285_c0_g1_i1.mrna1;Target=TRINITY_DN5285_c0_g1_i1 169 2 .
scaffold_1	Conpu1	exon	250822	251098	100	-	.	ID=TRINITY_DN5445_c0_g1_i1.mrna1.exon1;Name=TRINITY_DN5445_c0_g1_i1;Parent=TRINITY_DN5445_c0_g1_i1.mrna1;Target=TRINITY_DN5445_c0_g1_i1 277 1 .
scaffold_1	Conpu1	gene	250822	251098	.	-	.	ID=TRINITY_DN5445_c0_g1_i1.path1;Name=TRINITY_DN5445_c0_g1_i1
scaffold_1	Conpu1	mRNA	250822	251098	.	-	.	ID=TRINITY_DN5445_c0_g1_i1.mrna1;Name=TRINITY_DN5445_c0_g1_i1;Parent=TRINITY_DN5445_c0_g1_i1.path1;coverage=100.0;identity=100.0;matches=277;mismatches=0;indels=0;unknowns=0
scaffold_1	Conpu1	CDS	250997	251098	100	-	0	ID=TRINITY_DN5445_c0_g1_i1.mrna1.cds1;Name=TRINITY_DN5445_c0_g1_i1;Parent=TRINITY_DN5445_c0_g1_i1.mrna1;Target=TRINITY_DN5445_c0_g1_i1 102 1 .
scaffold_1	Conpu1	exon	267399	267637	100	+	.	ID=TRINITY_DN16701_c0_g1_i1.mrna1.exon1;Name=TRINITY_DN16701_c0_g1_i1;Parent=TRINITY_DN16701_c0_g1_i1.mrna1;Target=TRINITY_DN16701_c0_g1_i1 240 2 .
scaffold_1	Conpu1	gene	267399	267637	.	+	.	ID=TRINITY_DN16701_c0_g1_i1.path1;Name=TRINITY_DN16701_c0_g1_i1
scaffold_1	Conpu1	mRNA	267399	267637	.	+	.	ID=TRINITY_DN16701_c0_g1_i1.mrna1;Name=TRINITY_DN16701_c0_g1_i1;Parent=TRINITY_DN16701_c0_g1_i1.path1;coverage=96.0;identity=100.0;matches=239;mismatches=0;indels=0;unknowns=0
scaffold_1	Conpu1	CDS	267439	267636	100	+	0	ID=TRINITY_DN16701_c0_g1_i1.mrna1.cds1;Name=TRINITY_DN16701_c0_g1_i1;Parent=TRINITY_DN16701_c0_g1_i1.mrna1;Target=TRINITY_DN16701_c0_g1_i1 239 42 .
scaffold_1	Conpu1	exon	282918	283230	100	-	.	ID=TRINITY_DN16493_c0_g1_i1.mrna1.exon1;Name=TRINITY_DN16493_c0_g1_i1;Parent=TRINITY_DN16493_c0_g1_i1.mrna1;Target=TRINITY_DN16493_c0_g1_i1 313 1 .
scaffold_1	Conpu1	gene	282918	283230	.	-	.	ID=TRINITY_DN16493_c0_g1_i1.path1;Name=TRINITY_DN16493_c0_g1_i1
scaffold_1	Conpu1	mRNA	282918	283230	.	-	.	ID=TRINITY_DN16493_c0_g1_i1.mrna1;Name=TRINITY_DN16493_c0_g1_i1;Parent=TRINITY_DN16493_c0_g1_i1.path1;coverage=100.0;identity=100.0;matches=313;mismatches=0;indels=0;unknowns=0
scaffold_1	Conpu1	CDS	283097	283204	100	-	0	ID=TRINITY_DN16493_c0_g1_i1.mrna1.cds1;Name=TRINITY_DN16493_c0_g1_i1;Parent=TRINITY_DN16493_c0_g1_i1.mrna1;Target=TRINITY_DN16493_c0_g1_i1 134 27 .
scaffold_1	Conpu1	exon	303459	303729	100	+	.	ID=TRINITY_DN15914_c0_g1_i1.mrna1.exon1;Name=TRINITY_DN15914_c0_g1_i1;Parent=TRINITY_DN15914_c0_g1_i1.mrna1;Target=TRINITY_DN15914_c0_g1_i1 271 1 .
scaffold_1	Conpu1	gene	303459	303729	.	+	.	ID=TRINITY_DN15914_c0_g1_i1.path1;Name=TRINITY_DN15914_c0_g1_i1
scaffold_1	Conpu1	mRNA	303459	303729	.	+	.	ID=TRINITY_DN15914_c0_g1_i1.mrna1;Name=TRINITY_DN15914_c0_g1_i1;Parent=TRINITY_DN15914_c0_g1_i1.path1;coverage=100.0;identity=100.0;matches=271;mismatches=0;indels=0;unknowns=0
scaffold_1	Conpu1	CDS	303461	303598	100	+	0	ID=TRINITY_DN15914_c0_g1_i1.mrna1.cds1;Name=TRINITY_DN15914_c0_g1_i1;Parent=TRINITY_DN15914_c0_g1_i1.mrna1;Target=TRINITY_DN15914_c0_g1_i1 140 3 .
scaffold_1	Conpu1	exon	307474	307681	100	+	.	ID=TRINITY_DN11515_c0_g1_i1.mrna1.exon1;Name=TRINITY_DN11515_c0_g1_i1;Parent=TRINITY_DN11515_c0_g1_i1.mrna1;Target=TRINITY_DN11515_c0_g1_i1 208 1 .
scaffold_1	Conpu1	gene	307474	307681	.	+	.	ID=TRINITY_DN11515_c0_g1_i1.path1;Name=TRINITY_DN11515_c0_g1_i1
scaffold_1	Conpu1	mRNA	307474	307681	.	+	.	ID=TRINITY_DN11515_c0_g1_i1.mrna1;Name=TRINITY_DN11515_c0_g1_i1;Parent=TRINITY_DN11515_c0_g1_i1.path1;coverage=94.5;identity=100.0;matches=208;mismatches=0;indels=0;unknowns=0
scaffold_1	Conpu1	CDS	307476	307679	100	+	0	ID=TRINITY_DN11515_c0_g1_i1.mrna1.cds1;Name=TRINITY_DN11515_c0_g1_i1;Parent=TRINITY_DN11515_c0_g1_i1.mrna1;Target=TRINITY_DN11515_c0_g1_i1 206 3 .
scaffold_1	Conpu1	exon	343203	343525	99	+	.	ID=TRINITY_DN8540_c0_g1_i1.mrna1.exon1;Name=TRINITY_DN8540_c0_g1_i1;Parent=TRINITY_DN8540_c0_g1_i1.mrna1;Target=TRINITY_DN8540_c0_g1_i1 323 1 .
scaffold_1	Conpu1	gene	343203	343525	.	+	.	ID=TRINITY_DN8540_c0_g1_i1.path1;Name=TRINITY_DN8540_c0_g1_i1
scaffold_1	Conpu1	mRNA	343203	343525	.	+	.	ID=TRINITY_DN8540_c0_g1_i1.mrna1;Name=TRINITY_DN8540_c0_g1_i1;Parent=TRINITY_DN8540_c0_g1_i1.path1;coverage=100.0;identity=99.7;matches=322;mismatches=1;indels=0;unknowns=0
scaffold_1	Conpu1	CDS	343302	343457	100	+	0	ID=TRINITY_DN8540_c0_g1_i1.mrna1.cds1;Name=TRINITY_DN8540_c0_g1_i1;Parent=TRINITY_DN8540_c0_g1_i1.mrna1;Target=TRINITY_DN8540_c0_g1_i1 255 100 .
scaffold_1	Conpu1	exon	356886	356913	100	-	.	ID=TRINITY_DN1331_c0_g1_i1.mrna1.exon3;Name=TRINITY_DN1331_c0_g1_i1;Parent=TRINITY_DN1331_c0_g1_i1.mrna1;Target=TRINITY_DN1331_c0_g1_i1 1 28 -
scaffold_1	Conpu1	exon	356886	356913	100	-	.	ID=TRINITY_DN1331_c0_g1_i2.mrna1.exon4;Name=TRINITY_DN1331_c0_g1_i2;Parent=TRINITY_DN1331_c0_g1_i2.mrna1;Target=TRINITY_DN1331_c0_g1_i2 1 28 -
scaffold_1	Conpu1	gene	356886	357584	.	-	.	ID=TRINITY_DN1331_c0_g1_i1.path1;Name=TRINITY_DN1331_c0_g1_i1
scaffold_1	Conpu1	gene	356886	357584	.	-	.	ID=TRINITY_DN1331_c0_g1_i2.path1;Name=TRINITY_DN1331_c0_g1_i2
scaffold_1	Conpu1	mRNA	356886	357584	.	-	.	ID=TRINITY_DN1331_c0_g1_i1.mrna1;Name=TRINITY_DN1331_c0_g1_i1;Parent=TRINITY_DN1331_c0_g1_i1.path1;coverage=100.0;identity=100.0;matches=414;mismatches=0;indels=0;unknowns=0
scaffold_1	Conpu1	mRNA	356886	357584	.	-	.	ID=TRINITY_DN1331_c0_g1_i2.mrna1;Name=TRINITY_DN1331_c0_g1_i2;Parent=TRINITY_DN1331_c0_g1_i2.path1;coverage=100.0;identity=100.0;matches=362;mismatches=0;indels=0;unknowns=0
scaffold_1	Conpu1	exon	357123	357254	100	-	.	ID=TRINITY_DN1331_c0_g1_i1.mrna1.exon2;Name=TRINITY_DN1331_c0_g1_i1;Parent=TRINITY_DN1331_c0_g1_i1.mrna1;Target=TRINITY_DN1331_c0_g1_i1 29 160 -
scaffold_1	Conpu1	exon	357123	357254	100	-	.	ID=TRINITY_DN1331_c0_g1_i2.mrna1.exon3;Name=TRINITY_DN1331_c0_g1_i2;Parent=TRINITY_DN1331_c0_g1_i2.mrna1;Target=TRINITY_DN1331_c0_g1_i2 29 160 -
scaffold_1	Conpu1	CDS	357241	357254	100	-	1	ID=TRINITY_DN1331_c0_g1_i2.mrna1.cds3;Name=TRINITY_DN1331_c0_g1_i2;Parent=TRINITY_DN1331_c0_g1_i2.mrna1;Target=TRINITY_DN1331_c0_g1_i2 147 160 .
scaffold_1	Conpu1	CDS	357331	357351	100	-	1	ID=TRINITY_DN1331_c0_g1_i2.mrna1.cds2;Name=TRINITY_DN1331_c0_g1_i2;Parent=TRINITY_DN1331_c0_g1_i2.mrna1;Target=TRINITY_DN1331_c0_g1_i2 161 181 .
scaffold_1	Conpu1	exon	357331	357351	100	-	.	ID=TRINITY_DN1331_c0_g1_i2.mrna1.exon2;Name=TRINITY_DN1331_c0_g1_i2;Parent=TRINITY_DN1331_c0_g1_i2.mrna1;Target=TRINITY_DN1331_c0_g1_i2 161 181 -
scaffold_1	Conpu1	exon	357331	357584	100	-	.	ID=TRINITY_DN1331_c0_g1_i1.mrna1.exon1;Name=TRINITY_DN1331_c0_g1_i1;Parent=TRINITY_DN1331_c0_g1_i1.mrna1;Target=TRINITY_DN1331_c0_g1_i1 161 414 -
scaffold_1	Conpu1	CDS	357369	357584	100	-	0	ID=TRINITY_DN1331_c0_g1_i1.mrna1.cds1;Name=TRINITY_DN1331_c0_g1_i1;Parent=TRINITY_DN1331_c0_g1_i1.mrna1;Target=TRINITY_DN1331_c0_g1_i1 199 414 .
scaffold_1	Conpu1	CDS	357404	357584	100	-	0	ID=TRINITY_DN1331_c0_g1_i2.mrna1.cds1;Name=TRINITY_DN1331_c0_g1_i2;Parent=TRINITY_DN1331_c0_g1_i2.mrna1;Target=TRINITY_DN1331_c0_g1_i2 182 362 .
scaffold_1	Conpu1	exon	357404	357584	100	-	.	ID=TRINITY_DN1331_c0_g1_i2.mrna1.exon1;Name=TRINITY_DN1331_c0_g1_i2;Parent=TRINITY_DN1331_c0_g1_i2.mrna1;Target=TRINITY_DN1331_c0_g1_i2 182 362 -
scaffold_1	Conpu1	exon	357632	357938	100	-	.	ID=TRINITY_DN12409_c0_g1_i1.mrna1.exon1;Name=TRINITY_DN12409_c0_g1_i1;Parent=TRINITY_DN12409_c0_g1_i1.mrna1;Target=TRINITY_DN12409_c0_g1_i1 307 1 .
scaffold_1	Conpu1	gene	357632	357938	.	-	.	ID=TRINITY_DN12409_c0_g1_i1.path1;Name=TRINITY_DN12409_c0_g1_i1
scaffold_1	Conpu1	mRNA	357632	357938	.	-	.	ID=TRINITY_DN12409_c0_g1_i1.mrna1;Name=TRINITY_DN12409_c0_g1_i1;Parent=TRINITY_DN12409_c0_g1_i1.path1;coverage=100.0;identity=100.0;matches=307;mismatches=0;indels=0;unknowns=0
scaffold_1	Conpu1	CDS	357857	357937	100	-	0	ID=TRINITY_DN12409_c0_g1_i1.mrna1.cds1;Name=TRINITY_DN12409_c0_g1_i1;Parent=TRINITY_DN12409_c0_g1_i1.mrna1;Target=TRINITY_DN12409_c0_g1_i1 82 2 .
scaffold_1	Conpu1	exon	396998	397016	100	-	.	ID=TRINITY_DN5964_c0_g1_i1.mrna1.exon2;Name=TRINITY_DN5964_c0_g1_i1;Parent=TRINITY_DN5964_c0_g1_i1.mrna1;Target=TRINITY_DN5964_c0_g1_i1 1 19 -
scaffold_1	Conpu1	gene	396998	397351	.	-	.	ID=TRINITY_DN5964_c0_g1_i1.path1;Name=TRINITY_DN5964_c0_g1_i1
scaffold_1	Conpu1	mRNA	396998	397351	.	-	.	ID=TRINITY_DN5964_c0_g1_i1.mrna1;Name=TRINITY_DN5964_c0_g1_i1;Parent=TRINITY_DN5964_c0_g1_i1.path1;coverage=97.9;identity=100.0;matches=283;mismatches=0;indels=0;unknowns=0
scaffold_1	Conpu1	exon	397088	397351	100	-	.	ID=TRINITY_DN5964_c0_g1_i1.mrna1.exon1;Name=TRINITY_DN5964_c0_g1_i1;Parent=TRINITY_DN5964_c0_g1_i1.mrna1;Target=TRINITY_DN5964_c0_g1_i1 20 283 -
scaffold_1	Conpu1	CDS	397136	397351	100	-	0	ID=TRINITY_DN5964_c0_g1_i1.mrna1.cds1;Name=TRINITY_DN5964_c0_g1_i1;Parent=TRINITY_DN5964_c0_g1_i1.mrna1;Target=TRINITY_DN5964_c0_g1_i1 68 283 .
scaffold_1	Conpu1	exon	403705	403954	100	+	.	ID=TRINITY_DN15115_c0_g1_i1.mrna1.exon1;Name=TRINITY_DN15115_c0_g1_i1;Parent=TRINITY_DN15115_c0_g1_i1.mrna1;Target=TRINITY_DN15115_c0_g1_i1 250 1 .
scaffold_1	Conpu1	gene	403705	403954	.	+	.	ID=TRINITY_DN15115_c0_g1_i1.path1;Name=TRINITY_DN15115_c0_g1_i1
scaffold_1	Conpu1	mRNA	403705	403954	.	+	.	ID=TRINITY_DN15115_c0_g1_i1.mrna1;Name=TRINITY_DN15115_c0_g1_i1;Parent=TRINITY_DN15115_c0_g1_i1.path1;coverage=100.0;identity=100.0;matches=250;mismatches=0;indels=0;unknowns=0
scaffold_1	Conpu1	CDS	403706	403909	100	+	0	ID=TRINITY_DN15115_c0_g1_i1.mrna1.cds1;Name=TRINITY_DN15115_c0_g1_i1;Parent=TRINITY_DN15115_c0_g1_i1.mrna1;Target=TRINITY_DN15115_c0_g1_i1 205 2 .
scaffold_1	Conpu1	CDS	533177	533368	100	+	0	ID=TRINITY_DN13674_c0_g1_i1.mrna1.cds1;Name=TRINITY_DN13674_c0_g1_i1;Parent=TRINITY_DN13674_c0_g1_i1.mrna1;Target=TRINITY_DN13674_c0_g1_i1 192 1 .
scaffold_1	Conpu1	exon	533177	533476	100	+	.	ID=TRINITY_DN13674_c0_g1_i1.mrna1.exon1;Name=TRINITY_DN13674_c0_g1_i1;Parent=TRINITY_DN13674_c0_g1_i1.mrna1;Target=TRINITY_DN13674_c0_g1_i1 300 1 .
scaffold_1	Conpu1	gene	533177	533476	.	+	.	ID=TRINITY_DN13674_c0_g1_i1.path1;Name=TRINITY_DN13674_c0_g1_i1
scaffold_1	Conpu1	mRNA	533177	533476	.	+	.	ID=TRINITY_DN13674_c0_g1_i1.mrna1;Name=TRINITY_DN13674_c0_g1_i1;Parent=TRINITY_DN13674_c0_g1_i1.path1;coverage=100.0;identity=100.0;matches=300;mismatches=0;indels=0;unknowns=0
scaffold_1	Conpu1	exon	551801	552010	100	-	.	ID=TRINITY_DN14181_c0_g1_i1.mrna1.exon1;Name=TRINITY_DN14181_c0_g1_i1;Parent=TRINITY_DN14181_c0_g1_i1.mrna1;Target=TRINITY_DN14181_c0_g1_i1 210 1 .
scaffold_1	Conpu1	gene	551801	552010	.	-	.	ID=TRINITY_DN14181_c0_g1_i1.path1;Name=TRINITY_DN14181_c0_g1_i1
scaffold_1	Conpu1	mRNA	551801	552010	.	-	.	ID=TRINITY_DN14181_c0_g1_i1.mrna1;Name=TRINITY_DN14181_c0_g1_i1;Parent=TRINITY_DN14181_c0_g1_i1.path1;coverage=100.0;identity=100.0;matches=210;mismatches=0;indels=0;unknowns=0
scaffold_1	Conpu1	CDS	551847	552008	100	-	0	ID=TRINITY_DN14181_c0_g1_i1.mrna1.cds1;Name=TRINITY_DN14181_c0_g1_i1;Parent=TRINITY_DN14181_c0_g1_i1.mrna1;Target=TRINITY_DN14181_c0_g1_i1 164 3 .
scaffold_1	Conpu1	exon	586036	586278	100	+	.	ID=TRINITY_DN2924_c0_g1_i1.mrna1.exon1;Name=TRINITY_DN2924_c0_g1_i1;Parent=TRINITY_DN2924_c0_g1_i1.mrna1;Target=TRINITY_DN2924_c0_g1_i1 1 243 +
scaffold_1	Conpu1	exon	586036	586278	100	+	.	ID=TRINITY_DN2924_c0_g1_i4.mrna1.exon1;Name=TRINITY_DN2924_c0_g1_i4;Parent=TRINITY_DN2924_c0_g1_i4.mrna1;Target=TRINITY_DN2924_c0_g1_i4 1 243 +
scaffold_1	Conpu1	exon	586036	586657	100	+	.	ID=TRINITY_DN2924_c0_g1_i2.mrna1.exon1;Name=TRINITY_DN2924_c0_g1_i2;Parent=TRINITY_DN2924_c0_g1_i2.mrna1;Target=TRINITY_DN2924_c0_g1_i2 1 622 +
scaffold_1	Conpu1	exon	586036	586657	100	+	.	ID=TRINITY_DN2924_c0_g1_i3.mrna1.exon1;Name=TRINITY_DN2924_c0_g1_i3;Parent=TRINITY_DN2924_c0_g1_i3.mrna1;Target=TRINITY_DN2924_c0_g1_i3 1 622 +
scaffold_1	Conpu1	gene	586036	587168	.	+	.	ID=TRINITY_DN2924_c0_g1_i1.path1;Name=TRINITY_DN2924_c0_g1_i1
scaffold_1	Conpu1	gene	586036	587168	.	+	.	ID=TRINITY_DN2924_c0_g1_i2.path1;Name=TRINITY_DN2924_c0_g1_i2
scaffold_1	Conpu1	gene	586036	587168	.	+	.	ID=TRINITY_DN2924_c0_g1_i3.path1;Name=TRINITY_DN2924_c0_g1_i3
scaffold_1	Conpu1	gene	586036	587168	.	+	.	ID=TRINITY_DN2924_c0_g1_i4.path1;Name=TRINITY_DN2924_c0_g1_i4
scaffold_1	Conpu1	mRNA	586036	587168	.	+	.	ID=TRINITY_DN2924_c0_g1_i1.mrna1;Name=TRINITY_DN2924_c0_g1_i1;Parent=TRINITY_DN2924_c0_g1_i1.path1;coverage=98.8;identity=100.0;matches=739;mismatches=0;indels=0;unknowns=0
scaffold_1	Conpu1	mRNA	586036	587168	.	+	.	ID=TRINITY_DN2924_c0_g1_i2.mrna1;Name=TRINITY_DN2924_c0_g1_i2;Parent=TRINITY_DN2924_c0_g1_i2.path1;coverage=99.2;identity=100.0;matches=1058;mismatches=0;indels=0;unknowns=0
scaffold_1	Conpu1	mRNA	586036	587168	.	+	.	ID=TRINITY_DN2924_c0_g1_i3.mrna1;Name=TRINITY_DN2924_c0_g1_i3;Parent=TRINITY_DN2924_c0_g1_i3.path1;coverage=99.1;identity=100.0;matches=946;mismatches=0;indels=0;unknowns=0
scaffold_1	Conpu1	mRNA	586036	587168	.	+	.	ID=TRINITY_DN2924_c0_g1_i4.mrna1;Name=TRINITY_DN2924_c0_g1_i4;Parent=TRINITY_DN2924_c0_g1_i4.path1;coverage=98.6;identity=100.0;matches=627;mismatches=0;indels=0;unknowns=0
scaffold_1	Conpu1	CDS	586037	586278	100	+	0	ID=TRINITY_DN2924_c0_g1_i1.mrna1.cds1;Name=TRINITY_DN2924_c0_g1_i1;Parent=TRINITY_DN2924_c0_g1_i1.mrna1;Target=TRINITY_DN2924_c0_g1_i1 2 243 +
scaffold_1	Conpu1	CDS	586037	586278	100	+	0	ID=TRINITY_DN2924_c0_g1_i4.mrna1.cds1;Name=TRINITY_DN2924_c0_g1_i4;Parent=TRINITY_DN2924_c0_g1_i4.mrna1;Target=TRINITY_DN2924_c0_g1_i4 2 243 +
scaffold_1	Conpu1	CDS	586037	586387	100	+	0	ID=TRINITY_DN2924_c0_g1_i2.mrna1.cds1;Name=TRINITY_DN2924_c0_g1_i2;Parent=TRINITY_DN2924_c0_g1_i2.mrna1;Target=TRINITY_DN2924_c0_g1_i2 2 352 +
scaffold_1	Conpu1	CDS	586037	586387	100	+	0	ID=TRINITY_DN2924_c0_g1_i3.mrna1.cds1;Name=TRINITY_DN2924_c0_g1_i3;Parent=TRINITY_DN2924_c0_g1_i3.mrna1;Target=TRINITY_DN2924_c0_g1_i3 2 352 +
scaffold_1	Conpu1	CDS	586598	586657	100	+	2	ID=TRINITY_DN2924_c0_g1_i1.mrna1.cds2;Name=TRINITY_DN2924_c0_g1_i1;Parent=TRINITY_DN2924_c0_g1_i1.mrna1;Target=TRINITY_DN2924_c0_g1_i1 244 303 +
scaffold_1	Conpu1	CDS	586598	586657	100	+	2	ID=TRINITY_DN2924_c0_g1_i4.mrna1.cds2;Name=TRINITY_DN2924_c0_g1_i4;Parent=TRINITY_DN2924_c0_g1_i4.mrna1;Target=TRINITY_DN2924_c0_g1_i4 244 303 +
scaffold_1	Conpu1	exon	586598	586657	100	+	.	ID=TRINITY_DN2924_c0_g1_i1.mrna1.exon2;Name=TRINITY_DN2924_c0_g1_i1;Parent=TRINITY_DN2924_c0_g1_i1.mrna1;Target=TRINITY_DN2924_c0_g1_i1 244 303 +
scaffold_1	Conpu1	exon	586598	586657	100	+	.	ID=TRINITY_DN2924_c0_g1_i4.mrna1.exon2;Name=TRINITY_DN2924_c0_g1_i4;Parent=TRINITY_DN2924_c0_g1_i4.mrna1;Target=TRINITY_DN2924_c0_g1_i4 244 303 +
scaffold_1	Conpu1	CDS	586733	586856	100	+	2	ID=TRINITY_DN2924_c0_g1_i1.mrna1.cds3;Name=TRINITY_DN2924_c0_g1_i1;Parent=TRINITY_DN2924_c0_g1_i1.mrna1;Target=TRINITY_DN2924_c0_g1_i1 304 427 +
scaffold_1	Conpu1	CDS	586733	586856	100	+	2	ID=TRINITY_DN2924_c0_g1_i4.mrna1.cds3;Name=TRINITY_DN2924_c0_g1_i4;Parent=TRINITY_DN2924_c0_g1_i4.mrna1;Target=TRINITY_DN2924_c0_g1_i4 304 427 +
scaffold_1	Conpu1	exon	586733	586952	100	+	.	ID=TRINITY_DN2924_c0_g1_i3.mrna1.exon2;Name=TRINITY_DN2924_c0_g1_i3;Parent=TRINITY_DN2924_c0_g1_i3.mrna1;Target=TRINITY_DN2924_c0_g1_i3 623 842 +
scaffold_1	Conpu1	exon	586733	586952	100	+	.	ID=TRINITY_DN2924_c0_g1_i4.mrna1.exon3;Name=TRINITY_DN2924_c0_g1_i4;Parent=TRINITY_DN2924_c0_g1_i4.mrna1;Target=TRINITY_DN2924_c0_g1_i4 304 523 +
scaffold_1	Conpu1	exon	586733	587168	100	+	.	ID=TRINITY_DN2924_c0_g1_i1.mrna1.exon3;Name=TRINITY_DN2924_c0_g1_i1;Parent=TRINITY_DN2924_c0_g1_i1.mrna1;Target=TRINITY_DN2924_c0_g1_i1 304 739 +
scaffold_1	Conpu1	exon	586733	587168	100	+	.	ID=TRINITY_DN2924_c0_g1_i2.mrna1.exon2;Name=TRINITY_DN2924_c0_g1_i2;Parent=TRINITY_DN2924_c0_g1_i2.mrna1;Target=TRINITY_DN2924_c0_g1_i2 623 1058 +
scaffold_1	Conpu1	exon	587065	587168	100	+	.	ID=TRINITY_DN2924_c0_g1_i3.mrna1.exon3;Name=TRINITY_DN2924_c0_g1_i3;Parent=TRINITY_DN2924_c0_g1_i3.mrna1;Target=TRINITY_DN2924_c0_g1_i3 843 946 +
scaffold_1	Conpu1	exon	587065	587168	100	+	.	ID=TRINITY_DN2924_c0_g1_i4.mrna1.exon4;Name=TRINITY_DN2924_c0_g1_i4;Parent=TRINITY_DN2924_c0_g1_i4.mrna1;Target=TRINITY_DN2924_c0_g1_i4 524 627 +
scaffold_1	Conpu1	exon	587422	587966	100	-	.	ID=TRINITY_DN12960_c0_g1_i1.mrna1.exon1;Name=TRINITY_DN12960_c0_g1_i1;Parent=TRINITY_DN12960_c0_g1_i1.mrna1;Target=TRINITY_DN12960_c0_g1_i1 545 1 .
scaffold_1	Conpu1	gene	587422	587966	.	-	.	ID=TRINITY_DN12960_c0_g1_i1.path1;Name=TRINITY_DN12960_c0_g1_i1
scaffold_1	Conpu1	mRNA	587422	587966	.	-	.	ID=TRINITY_DN12960_c0_g1_i1.mrna1;Name=TRINITY_DN12960_c0_g1_i1;Parent=TRINITY_DN12960_c0_g1_i1.path1;coverage=100.0;identity=100.0;matches=545;mismatches=0;indels=0;unknowns=0
scaffold_1	Conpu1	CDS	587853	587966	100	-	0	ID=TRINITY_DN12960_c0_g1_i1.mrna1.cds1;Name=TRINITY_DN12960_c0_g1_i1;Parent=TRINITY_DN12960_c0_g1_i1.mrna1;Target=TRINITY_DN12960_c0_g1_i1 114 1 .
scaffold_1	Conpu1	exon	588478	588893	99	-	.	ID=TRINITY_DN4877_c0_g1_i1.mrna1.exon1;Name=TRINITY_DN4877_c0_g1_i1;Parent=TRINITY_DN4877_c0_g1_i1.mrna1;Target=TRINITY_DN4877_c0_g1_i1 413 1 .
scaffold_1	Conpu1	gene	588478	588893	.	-	.	ID=TRINITY_DN4877_c0_g1_i1.path1;Name=TRINITY_DN4877_c0_g1_i1
scaffold_1	Conpu1	mRNA	588478	588893	.	-	.	ID=TRINITY_DN4877_c0_g1_i1.mrna1;Name=TRINITY_DN4877_c0_g1_i1;Parent=TRINITY_DN4877_c0_g1_i1.path1;coverage=100.0;identity=99.3;matches=413;mismatches=0;indels=3;unknowns=0
scaffold_1	Conpu1	CDS	588783	588893	97	-	0	ID=TRINITY_DN4877_c0_g1_i1.mrna1.cds1;Name=TRINITY_DN4877_c0_g1_i1;Parent=TRINITY_DN4877_c0_g1_i1.mrna1;Target=TRINITY_DN4877_c0_g1_i1 108 1 .
scaffold_1	Conpu1	exon	588856	589076	100	-	.	ID=TRINITY_DN9934_c0_g1_i1.mrna1.exon1;Name=TRINITY_DN9934_c0_g1_i1;Parent=TRINITY_DN9934_c0_g1_i1.mrna1;Target=TRINITY_DN9934_c0_g1_i1 221 1 .
scaffold_1	Conpu1	gene	588856	589076	.	-	.	ID=TRINITY_DN9934_c0_g1_i1.path1;Name=TRINITY_DN9934_c0_g1_i1
scaffold_1	Conpu1	mRNA	588856	589076	.	-	.	ID=TRINITY_DN9934_c0_g1_i1.mrna1;Name=TRINITY_DN9934_c0_g1_i1;Parent=TRINITY_DN9934_c0_g1_i1.path1;coverage=100.0;identity=100.0;matches=221;mismatches=0;indels=0;unknowns=0
scaffold_1	Conpu1	CDS	588858	589076	100	-	0	ID=TRINITY_DN9934_c0_g1_i1.mrna1.cds1;Name=TRINITY_DN9934_c0_g1_i1;Parent=TRINITY_DN9934_c0_g1_i1.mrna1;Target=TRINITY_DN9934_c0_g1_i1 219 1 .
scaffold_1	Conpu1	exon	589113	589398	100	-	.	ID=TRINITY_DN6220_c0_g1_i1.mrna1.exon1;Name=TRINITY_DN6220_c0_g1_i1;Parent=TRINITY_DN6220_c0_g1_i1.mrna1;Target=TRINITY_DN6220_c0_g1_i1 286 1 .
scaffold_1	Conpu1	gene	589113	589398	.	-	.	ID=TRINITY_DN6220_c0_g1_i1.path1;Name=TRINITY_DN6220_c0_g1_i1
scaffold_1	Conpu1	mRNA	589113	589398	.	-	.	ID=TRINITY_DN6220_c0_g1_i1.mrna1;Name=TRINITY_DN6220_c0_g1_i1;Parent=TRINITY_DN6220_c0_g1_i1.path1;coverage=100.0;identity=100.0;matches=286;mismatches=0;indels=0;unknowns=0
scaffold_1	Conpu1	CDS	589210	589365	100	-	0	ID=TRINITY_DN6220_c0_g1_i1.mrna1.cds1;Name=TRINITY_DN6220_c0_g1_i1;Parent=TRINITY_DN6220_c0_g1_i1.mrna1;Target=TRINITY_DN6220_c0_g1_i1 189 34 .
scaffold_1	Conpu1	exon	594575	595034	100	+	.	ID=TRINITY_DN9485_c0_g1_i1.mrna1.exon1;Name=TRINITY_DN9485_c0_g1_i1;Parent=TRINITY_DN9485_c0_g1_i1.mrna1;Target=TRINITY_DN9485_c0_g1_i1 460 1 .
scaffold_1	Conpu1	gene	594575	595034	.	+	.	ID=TRINITY_DN9485_c0_g1_i1.path1;Name=TRINITY_DN9485_c0_g1_i1
scaffold_1	Conpu1	mRNA	594575	595034	.	+	.	ID=TRINITY_DN9485_c0_g1_i1.mrna1;Name=TRINITY_DN9485_c0_g1_i1;Parent=TRINITY_DN9485_c0_g1_i1.path1;coverage=100.0;identity=100.0;matches=460;mismatches=0;indels=0;unknowns=0
scaffold_1	Conpu1	CDS	594639	594851	100	+	0	ID=TRINITY_DN9485_c0_g1_i1.mrna1.cds1;Name=TRINITY_DN9485_c0_g1_i1;Parent=TRINITY_DN9485_c0_g1_i1.mrna1;Target=TRINITY_DN9485_c0_g1_i1 277 65 .
scaffold_1	Conpu1	exon	594999	595114	100	-	.	ID=TRINITY_DN12273_c0_g1_i1.mrna1.exon2;Name=TRINITY_DN12273_c0_g1_i1;Parent=TRINITY_DN12273_c0_g1_i1.mrna1;Target=TRINITY_DN12273_c0_g1_i1 300 415 +
scaffold_1	Conpu1	gene	594999	595514	.	-	.	ID=TRINITY_DN12273_c0_g1_i1.path1;Name=TRINITY_DN12273_c0_g1_i1
scaffold_1	Conpu1	mRNA	594999	595514	.	-	.	ID=TRINITY_DN12273_c0_g1_i1.mrna1;Name=TRINITY_DN12273_c0_g1_i1;Parent=TRINITY_DN12273_c0_g1_i1.path1;coverage=96.3;identity=100.0;matches=415;mismatches=0;indels=0;unknowns=0
scaffold_1	Conpu1	CDS	595086	595114	100	-	1	ID=TRINITY_DN12273_c0_g1_i1.mrna1.cds2;Name=TRINITY_DN12273_c0_g1_i1;Parent=TRINITY_DN12273_c0_g1_i1.mrna1;Target=TRINITY_DN12273_c0_g1_i1 300 328 +
scaffold_1	Conpu1	CDS	595216	595513	100	-	0	ID=TRINITY_DN12273_c0_g1_i1.mrna1.cds1;Name=TRINITY_DN12273_c0_g1_i1;Parent=TRINITY_DN12273_c0_g1_i1.mrna1;Target=TRINITY_DN12273_c0_g1_i1 2 299 +
scaffold_1	Conpu1	exon	595216	595514	100	-	.	ID=TRINITY_DN12273_c0_g1_i1.mrna1.exon1;Name=TRINITY_DN12273_c0_g1_i1;Parent=TRINITY_DN12273_c0_g1_i1.mrna1;Target=TRINITY_DN12273_c0_g1_i1 1 299 +
scaffold_1	Conpu1	exon	595493	595585	100	-	.	ID=TRINITY_DN6174_c0_g1_i1.mrna1.exon2;Name=TRINITY_DN6174_c0_g1_i1;Parent=TRINITY_DN6174_c0_g1_i1.mrna1;Target=TRINITY_DN6174_c0_g1_i1 112 204 +
scaffold_1	Conpu1	gene	595493	595759	.	-	.	ID=TRINITY_DN6174_c0_g1_i1.path1;Name=TRINITY_DN6174_c0_g1_i1
scaffold_1	Conpu1	mRNA	595493	595759	.	-	.	ID=TRINITY_DN6174_c0_g1_i1.mrna1;Name=TRINITY_DN6174_c0_g1_i1;Parent=TRINITY_DN6174_c0_g1_i1.path1;coverage=100.0;identity=100.0;matches=204;mismatches=0;indels=0;unknowns=0
scaffold_1	Conpu1	CDS	595523	595585	100	-	0	ID=TRINITY_DN6174_c0_g1_i1.mrna1.cds2;Name=TRINITY_DN6174_c0_g1_i1;Parent=TRINITY_DN6174_c0_g1_i1.mrna1;Target=TRINITY_DN6174_c0_g1_i1 112 174 +
scaffold_1	Conpu1	CDS	595649	595759	100	-	0	ID=TRINITY_DN6174_c0_g1_i1.mrna1.cds1;Name=TRINITY_DN6174_c0_g1_i1;Parent=TRINITY_DN6174_c0_g1_i1.mrna1;Target=TRINITY_DN6174_c0_g1_i1 1 111 +
scaffold_1	Conpu1	exon	595649	595759	100	-	.	ID=TRINITY_DN6174_c0_g1_i1.mrna1.exon1;Name=TRINITY_DN6174_c0_g1_i1;Parent=TRINITY_DN6174_c0_g1_i1.mrna1;Target=TRINITY_DN6174_c0_g1_i1 1 111 +
scaffold_1	Conpu1	CDS	609398	609682	100	+	0	ID=TRINITY_DN9584_c0_g1_i1.mrna1.cds1;Name=TRINITY_DN9584_c0_g1_i1;Parent=TRINITY_DN9584_c0_g1_i1.mrna1;Target=TRINITY_DN9584_c0_g1_i1 285 1 .
scaffold_1	Conpu1	exon	609398	609683	100	+	.	ID=TRINITY_DN9584_c0_g1_i1.mrna1.exon1;Name=TRINITY_DN9584_c0_g1_i1;Parent=TRINITY_DN9584_c0_g1_i1.mrna1;Target=TRINITY_DN9584_c0_g1_i1 286 1 .
scaffold_1	Conpu1	gene	609398	609683	.	+	.	ID=TRINITY_DN9584_c0_g1_i1.path1;Name=TRINITY_DN9584_c0_g1_i1
scaffold_1	Conpu1	mRNA	609398	609683	.	+	.	ID=TRINITY_DN9584_c0_g1_i1.mrna1;Name=TRINITY_DN9584_c0_g1_i1;Parent=TRINITY_DN9584_c0_g1_i1.path1;coverage=100.0;identity=100.0;matches=286;mismatches=0;indels=0;unknowns=0
scaffold_1	Conpu1	exon	614171	614389	100	-	.	ID=TRINITY_DN6464_c0_g1_i1.mrna1.exon1;Name=TRINITY_DN6464_c0_g1_i1;Parent=TRINITY_DN6464_c0_g1_i1.mrna1;Target=TRINITY_DN6464_c0_g1_i1 219 1 .
scaffold_1	Conpu1	gene	614171	614389	.	-	.	ID=TRINITY_DN6464_c0_g1_i1.path1;Name=TRINITY_DN6464_c0_g1_i1
scaffold_1	Conpu1	mRNA	614171	614389	.	-	.	ID=TRINITY_DN6464_c0_g1_i1.mrna1;Name=TRINITY_DN6464_c0_g1_i1;Parent=TRINITY_DN6464_c0_g1_i1.path1;coverage=100.0;identity=100.0;matches=219;mismatches=0;indels=0;unknowns=0
scaffold_1	Conpu1	CDS	614243	614389	100	-	0	ID=TRINITY_DN6464_c0_g1_i1.mrna1.cds1;Name=TRINITY_DN6464_c0_g1_i1;Parent=TRINITY_DN6464_c0_g1_i1.mrna1;Target=TRINITY_DN6464_c0_g1_i1 147 1 .
scaffold_1	Conpu1	CDS	617626	617862	100	+	0	ID=TRINITY_DN9505_c0_g1_i1.mrna1.cds1;Name=TRINITY_DN9505_c0_g1_i1;Parent=TRINITY_DN9505_c0_g1_i1.mrna1;Target=TRINITY_DN9505_c0_g1_i1 237 1 .
scaffold_1	Conpu1	exon	617626	617885	100	+	.	ID=TRINITY_DN9505_c0_g1_i1.mrna1.exon1;Name=TRINITY_DN9505_c0_g1_i1;Parent=TRINITY_DN9505_c0_g1_i1.mrna1;Target=TRINITY_DN9505_c0_g1_i1 260 1 .
scaffold_1	Conpu1	gene	617626	617885	.	+	.	ID=TRINITY_DN9505_c0_g1_i1.path1;Name=TRINITY_DN9505_c0_g1_i1
scaffold_1	Conpu1	mRNA	617626	617885	.	+	.	ID=TRINITY_DN9505_c0_g1_i1.mrna1;Name=TRINITY_DN9505_c0_g1_i1;Parent=TRINITY_DN9505_c0_g1_i1.path1;coverage=97.4;identity=100.0;matches=260;mismatches=0;indels=0;unknowns=0
scaffold_1	Conpu1	exon	623121	623392	100	-	.	ID=TRINITY_DN4766_c0_g1_i1.mrna1.exon2;Name=TRINITY_DN4766_c0_g1_i1;Parent=TRINITY_DN4766_c0_g1_i1.mrna1;Target=TRINITY_DN4766_c0_g1_i1 266 537 +
scaffold_1	Conpu1	gene	623121	623693	.	-	.	ID=TRINITY_DN4766_c0_g1_i1.path1;Name=TRINITY_DN4766_c0_g1_i1
scaffold_1	Conpu1	mRNA	623121	623693	.	-	.	ID=TRINITY_DN4766_c0_g1_i1.mrna1;Name=TRINITY_DN4766_c0_g1_i1;Parent=TRINITY_DN4766_c0_g1_i1.path1;coverage=96.6;identity=100.0;matches=519;mismatches=0;indels=0;unknowns=0
scaffold_1	Conpu1	exon	623447	623693	100	-	.	ID=TRINITY_DN4766_c0_g1_i1.mrna1.exon1;Name=TRINITY_DN4766_c0_g1_i1;Parent=TRINITY_DN4766_c0_g1_i1.mrna1;Target=TRINITY_DN4766_c0_g1_i1 19 265 +
scaffold_1	Conpu1	CDS	623499	623693	100	-	0	ID=TRINITY_DN4766_c0_g1_i1.mrna1.cds1;Name=TRINITY_DN4766_c0_g1_i1;Parent=TRINITY_DN4766_c0_g1_i1.mrna1;Target=TRINITY_DN4766_c0_g1_i1 19 213 +
scaffold_1	Conpu1	exon	623662	623989	100	-	.	ID=TRINITY_DN9014_c0_g1_i1.mrna1.exon3;Name=TRINITY_DN9014_c0_g1_i1;Parent=TRINITY_DN9014_c0_g1_i1.mrna1;Target=TRINITY_DN9014_c0_g1_i1 35 362 +
scaffold_1	Conpu1	gene	623662	624175	.	-	.	ID=TRINITY_DN9014_c0_g1_i1.path1;Name=TRINITY_DN9014_c0_g1_i1
scaffold_1	Conpu1	mRNA	623662	624175	.	-	.	ID=TRINITY_DN9014_c0_g1_i1.mrna1;Name=TRINITY_DN9014_c0_g1_i1;Parent=TRINITY_DN9014_c0_g1_i1.path1;coverage=100.0;identity=100.0;matches=362;mismatches=0;indels=0;unknowns=0
scaffold_1	Conpu1	CDS	623736	623915	100	-	0	ID=TRINITY_DN9014_c0_g1_i1.mrna1.cds1;Name=TRINITY_DN9014_c0_g1_i1;Parent=TRINITY_DN9014_c0_g1_i1.mrna1;Target=TRINITY_DN9014_c0_g1_i1 109 288 +
scaffold_1	Conpu1	exon	624066	624080	100	-	.	ID=TRINITY_DN9014_c0_g1_i1.mrna1.exon2;Name=TRINITY_DN9014_c0_g1_i1;Parent=TRINITY_DN9014_c0_g1_i1.mrna1;Target=TRINITY_DN9014_c0_g1_i1 20 34 +
scaffold_1	Conpu1	CDS	624157	624217	100	-	2	ID=TRINITY_DN16617_c0_g1_i1.mrna1.cds2;Name=TRINITY_DN16617_c0_g1_i1;Parent=TRINITY_DN16617_c0_g1_i1.mrna1;Target=TRINITY_DN16617_c0_g1_i1 263 203 .
scaffold_1	Conpu1	exon	624157	624175	100	-	.	ID=TRINITY_DN9014_c0_g1_i1.mrna1.exon1;Name=TRINITY_DN9014_c0_g1_i1;Parent=TRINITY_DN9014_c0_g1_i1.mrna1;Target=TRINITY_DN9014_c0_g1_i1 1 19 +
scaffold_1	Conpu1	exon	624157	624217	100	-	.	ID=TRINITY_DN16617_c0_g1_i1.mrna1.exon2;Name=TRINITY_DN16617_c0_g1_i1;Parent=TRINITY_DN16617_c0_g1_i1.mrna1;Target=TRINITY_DN16617_c0_g1_i1 263 203 .
scaffold_1	Conpu1	gene	624157	624465	.	-	.	ID=TRINITY_DN16617_c0_g1_i1.path1;Name=TRINITY_DN16617_c0_g1_i1
scaffold_1	Conpu1	mRNA	624157	624465	.	-	.	ID=TRINITY_DN16617_c0_g1_i1.mrna1;Name=TRINITY_DN16617_c0_g1_i1;Parent=TRINITY_DN16617_c0_g1_i1.path1;coverage=97.4;identity=100.0;matches=263;mismatches=0;indels=0;unknowns=0
scaffold_1	Conpu1	CDS	624264	624289	100	-	0	ID=TRINITY_DN16617_c0_g1_i1.mrna1.cds1;Name=TRINITY_DN16617_c0_g1_i1;Parent=TRINITY_DN16617_c0_g1_i1.mrna1;Target=TRINITY_DN16617_c0_g1_i1 202 177 .
scaffold_1	Conpu1	exon	624264	624465	100	-	.	ID=TRINITY_DN16617_c0_g1_i1.mrna1.exon1;Name=TRINITY_DN16617_c0_g1_i1;Parent=TRINITY_DN16617_c0_g1_i1.mrna1;Target=TRINITY_DN16617_c0_g1_i1 202 1 .
scaffold_1	Conpu1	CDS	646104	646334	97	-	0	ID=TRINITY_DN12041_c0_g1_i1.mrna1.cds1;Name=TRINITY_DN12041_c0_g1_i1;Parent=TRINITY_DN12041_c0_g1_i1.mrna1;Target=TRINITY_DN12041_c0_g1_i1 242 12 .
scaffold_1	Conpu1	exon	646104	646334	97	-	.	ID=TRINITY_DN12041_c0_g1_i1.mrna1.exon1;Name=TRINITY_DN12041_c0_g1_i1;Parent=TRINITY_DN12041_c0_g1_i1.mrna1;Target=TRINITY_DN12041_c0_g1_i1 242 12 .
scaffold_1	Conpu1	gene	646104	646334	.	-	.	ID=TRINITY_DN12041_c0_g1_i1.path1;Name=TRINITY_DN12041_c0_g1_i1
scaffold_1	Conpu1	mRNA	646104	646334	.	-	.	ID=TRINITY_DN12041_c0_g1_i1.mrna1;Name=TRINITY_DN12041_c0_g1_i1;Parent=TRINITY_DN12041_c0_g1_i1.path1;coverage=77.5;identity=97.8;matches=226;mismatches=5;indels=0;unknowns=0
scaffold_1	Conpu1	exon	696359	696585	100	-	.	ID=TRINITY_DN6162_c0_g1_i1.mrna1.exon1;Name=TRINITY_DN6162_c0_g1_i1;Parent=TRINITY_DN6162_c0_g1_i1.mrna1;Target=TRINITY_DN6162_c0_g1_i1 227 1 .
scaffold_1	Conpu1	gene	696359	696585	.	-	.	ID=TRINITY_DN6162_c0_g1_i1.path1;Name=TRINITY_DN6162_c0_g1_i1
scaffold_1	Conpu1	mRNA	696359	696585	.	-	.	ID=TRINITY_DN6162_c0_g1_i1.mrna1;Name=TRINITY_DN6162_c0_g1_i1;Parent=TRINITY_DN6162_c0_g1_i1.path1;coverage=100.0;identity=100.0;matches=227;mismatches=0;indels=0;unknowns=0
scaffold_1	Conpu1	CDS	696486	696584	100	-	0	ID=TRINITY_DN6162_c0_g1_i1.mrna1.cds1;Name=TRINITY_DN6162_c0_g1_i1;Parent=TRINITY_DN6162_c0_g1_i1.mrna1;Target=TRINITY_DN6162_c0_g1_i1 100 2 .
scaffold_1	Conpu1	CDS	711293	711466	100	+	0	ID=TRINITY_DN16322_c0_g1_i1.mrna1.cds1;Name=TRINITY_DN16322_c0_g1_i1;Parent=TRINITY_DN16322_c0_g1_i1.mrna1;Target=TRINITY_DN16322_c0_g1_i1 175 2 .
scaffold_1	Conpu1	exon	711293	711555	100	+	.	ID=TRINITY_DN16322_c0_g1_i1.mrna1.exon1;Name=TRINITY_DN16322_c0_g1_i1;Parent=TRINITY_DN16322_c0_g1_i1.mrna1;Target=TRINITY_DN16322_c0_g1_i1 264 2 .
scaffold_1	Conpu1	gene	711293	711555	.	+	.	ID=TRINITY_DN16322_c0_g1_i1.path1;Name=TRINITY_DN16322_c0_g1_i1
scaffold_1	Conpu1	mRNA	711293	711555	.	+	.	ID=TRINITY_DN16322_c0_g1_i1.mrna1;Name=TRINITY_DN16322_c0_g1_i1;Parent=TRINITY_DN16322_c0_g1_i1.path1;coverage=99.6;identity=100.0;matches=263;mismatches=0;indels=0;unknowns=0
scaffold_1	Conpu1	exon	718277	718767	100	+	.	ID=TRINITY_DN9571_c0_g1_i1.mrna1.exon1;Name=TRINITY_DN9571_c0_g1_i1;Parent=TRINITY_DN9571_c0_g1_i1.mrna1;Target=TRINITY_DN9571_c0_g1_i1 491 1 .
scaffold_1	Conpu1	gene	718277	718767	.	+	.	ID=TRINITY_DN9571_c0_g1_i1.path1;Name=TRINITY_DN9571_c0_g1_i1
scaffold_1	Conpu1	mRNA	718277	718767	.	+	.	ID=TRINITY_DN9571_c0_g1_i1.mrna1;Name=TRINITY_DN9571_c0_g1_i1;Parent=TRINITY_DN9571_c0_g1_i1.path1;coverage=100.0;identity=100.0;matches=491;mismatches=0;indels=0;unknowns=0
scaffold_1	Conpu1	CDS	718612	718668	100	+	0	ID=TRINITY_DN9571_c0_g1_i1.mrna1.cds1;Name=TRINITY_DN9571_c0_g1_i1;Parent=TRINITY_DN9571_c0_g1_i1.mrna1;Target=TRINITY_DN9571_c0_g1_i1 392 336 .
scaffold_1	Conpu1	exon	853824	854234	100	-	.	ID=TRINITY_DN9204_c0_g1_i1.mrna1.exon1;Name=TRINITY_DN9204_c0_g1_i1;Parent=TRINITY_DN9204_c0_g1_i1.mrna1;Target=TRINITY_DN9204_c0_g1_i1 411 1 .
scaffold_1	Conpu1	gene	853824	854234	.	-	.	ID=TRINITY_DN9204_c0_g1_i1.path1;Name=TRINITY_DN9204_c0_g1_i1
scaffold_1	Conpu1	mRNA	853824	854234	.	-	.	ID=TRINITY_DN9204_c0_g1_i1.mrna1;Name=TRINITY_DN9204_c0_g1_i1;Parent=TRINITY_DN9204_c0_g1_i1.path1;coverage=100.0;identity=100.0;matches=411;mismatches=0;indels=0;unknowns=0
scaffold_1	Conpu1	CDS	853950	854234	100	-	0	ID=TRINITY_DN9204_c0_g1_i1.mrna1.cds1;Name=TRINITY_DN9204_c0_g1_i1;Parent=TRINITY_DN9204_c0_g1_i1.mrna1;Target=TRINITY_DN9204_c0_g1_i1 285 1 .
scaffold_1	Conpu1	exon	886465	886734	100	+	.	ID=TRINITY_DN16454_c0_g1_i1.mrna1.exon1;Name=TRINITY_DN16454_c0_g1_i1;Parent=TRINITY_DN16454_c0_g1_i1.mrna1;Target=TRINITY_DN16454_c0_g1_i1 270 1 .
scaffold_1	Conpu1	gene	886465	886734	.	+	.	ID=TRINITY_DN16454_c0_g1_i1.path1;Name=TRINITY_DN16454_c0_g1_i1
scaffold_1	Conpu1	mRNA	886465	886734	.	+	.	ID=TRINITY_DN16454_c0_g1_i1.mrna1;Name=TRINITY_DN16454_c0_g1_i1;Parent=TRINITY_DN16454_c0_g1_i1.path1;coverage=100.0;identity=100.0;matches=270;mismatches=0;indels=0;unknowns=0
scaffold_1	Conpu1	CDS	886467	886556	100	+	0	ID=TRINITY_DN16454_c0_g1_i1.mrna1.cds1;Name=TRINITY_DN16454_c0_g1_i1;Parent=TRINITY_DN16454_c0_g1_i1.mrna1;Target=TRINITY_DN16454_c0_g1_i1 92 3 .
scaffold_1	Conpu1	exon	886718	887395	100	+	.	ID=TRINITY_DN4576_c0_g1_i1.mrna1.exon1;Name=TRINITY_DN4576_c0_g1_i1;Parent=TRINITY_DN4576_c0_g1_i1.mrna1;Target=TRINITY_DN4576_c0_g1_i1 678 1 .
scaffold_1	Conpu1	gene	886718	887395	.	+	.	ID=TRINITY_DN4576_c0_g1_i1.path1;Name=TRINITY_DN4576_c0_g1_i1
scaffold_1	Conpu1	mRNA	886718	887395	.	+	.	ID=TRINITY_DN4576_c0_g1_i1.mrna1;Name=TRINITY_DN4576_c0_g1_i1;Parent=TRINITY_DN4576_c0_g1_i1.path1;coverage=100.0;identity=100.0;matches=678;mismatches=0;indels=0;unknowns=0
scaffold_1	Conpu1	CDS	886942	887145	100	+	0	ID=TRINITY_DN4576_c0_g1_i1.mrna1.cds1;Name=TRINITY_DN4576_c0_g1_i1;Parent=TRINITY_DN4576_c0_g1_i1.mrna1;Target=TRINITY_DN4576_c0_g1_i1 428 225 .
scaffold_1	Conpu1	exon	906847	907487	100	+	.	ID=TRINITY_DN14403_c0_g1_i1.mrna1.exon1;Name=TRINITY_DN14403_c0_g1_i1;Parent=TRINITY_DN14403_c0_g1_i1.mrna1;Target=TRINITY_DN14403_c0_g1_i1 641 1 .
scaffold_1	Conpu1	gene	906847	907487	.	+	.	ID=TRINITY_DN14403_c0_g1_i1.path1;Name=TRINITY_DN14403_c0_g1_i1
scaffold_1	Conpu1	mRNA	906847	907487	.	+	.	ID=TRINITY_DN14403_c0_g1_i1.mrna1;Name=TRINITY_DN14403_c0_g1_i1;Parent=TRINITY_DN14403_c0_g1_i1.path1;coverage=100.0;identity=100.0;matches=641;mismatches=0;indels=0;unknowns=0
scaffold_1	Conpu1	CDS	906998	907156	100	+	0	ID=TRINITY_DN14403_c0_g1_i1.mrna1.cds1;Name=TRINITY_DN14403_c0_g1_i1;Parent=TRINITY_DN14403_c0_g1_i1.mrna1;Target=TRINITY_DN14403_c0_g1_i1 310 152 .
scaffold_1	Conpu1	exon	926511	926534	100	-	.	ID=TRINITY_DN12470_c0_g1_i1.mrna1.exon4;Name=TRINITY_DN12470_c0_g1_i1;Parent=TRINITY_DN12470_c0_g1_i1.mrna1;Target=TRINITY_DN12470_c0_g1_i1 422 445 +
scaffold_1	Conpu1	gene	926511	927186	.	-	.	ID=TRINITY_DN12470_c0_g1_i1.path1;Name=TRINITY_DN12470_c0_g1_i1
scaffold_1	Conpu1	mRNA	926511	927186	.	-	.	ID=TRINITY_DN12470_c0_g1_i1.mrna1;Name=TRINITY_DN12470_c0_g1_i1;Parent=TRINITY_DN12470_c0_g1_i1.path1;coverage=100.0;identity=100.0;matches=445;mismatches=0;indels=0;unknowns=0
scaffold_1	Conpu1	exon	926634	926796	100	-	.	ID=TRINITY_DN12470_c0_g1_i1.mrna1.exon3;Name=TRINITY_DN12470_c0_g1_i1;Parent=TRINITY_DN12470_c0_g1_i1.mrna1;Target=TRINITY_DN12470_c0_g1_i1 259 421 +
scaffold_1	Conpu1	CDS	926668	926796	100	-	0	ID=TRINITY_DN12470_c0_g1_i1.mrna1.cds2;Name=TRINITY_DN12470_c0_g1_i1;Parent=TRINITY_DN12470_c0_g1_i1.mrna1;Target=TRINITY_DN12470_c0_g1_i1 259 387 +
scaffold_1	Conpu1	CDS	926852	926962	100	-	0	ID=TRINITY_DN12470_c0_g1_i1.mrna1.cds1;Name=TRINITY_DN12470_c0_g1_i1;Parent=TRINITY_DN12470_c0_g1_i1.mrna1;Target=TRINITY_DN12470_c0_g1_i1 148 258 +
scaffold_1	Conpu1	exon	926852	927086	100	-	.	ID=TRINITY_DN12470_c0_g1_i1.mrna1.exon2;Name=TRINITY_DN12470_c0_g1_i1;Parent=TRINITY_DN12470_c0_g1_i1.mrna1;Target=TRINITY_DN12470_c0_g1_i1 24 258 +
scaffold_1	Conpu1	exon	927164	927186	100	-	.	ID=TRINITY_DN12470_c0_g1_i1.mrna1.exon1;Name=TRINITY_DN12470_c0_g1_i1;Parent=TRINITY_DN12470_c0_g1_i1.mrna1;Target=TRINITY_DN12470_c0_g1_i1 1 23 +
scaffold_1	Conpu1	exon	954764	954790	100	-	.	ID=TRINITY_DN12383_c0_g1_i1.mrna1.exon3;Name=TRINITY_DN12383_c0_g1_i1;Parent=TRINITY_DN12383_c0_g1_i1.mrna1;Target=TRINITY_DN12383_c0_g1_i1 346 372 +
scaffold_1	Conpu1	gene	954764	955244	.	-	.	ID=TRINITY_DN12383_c0_g1_i1.path1;Name=TRINITY_DN12383_c0_g1_i1
scaffold_1	Conpu1	mRNA	954764	955244	.	-	.	ID=TRINITY_DN12383_c0_g1_i1.mrna1;Name=TRINITY_DN12383_c0_g1_i1;Parent=TRINITY_DN12383_c0_g1_i1.path1;coverage=94.4;identity=100.0;matches=351;mismatches=0;indels=0;unknowns=0
scaffold_1	Conpu1	exon	954859	955024	100	-	.	ID=TRINITY_DN12383_c0_g1_i1.mrna1.exon2;Name=TRINITY_DN12383_c0_g1_i1;Parent=TRINITY_DN12383_c0_g1_i1.mrna1;Target=TRINITY_DN12383_c0_g1_i1 180 345 +
scaffold_1	Conpu1	CDS	954988	955024	100	-	2	ID=TRINITY_DN12383_c0_g1_i1.mrna1.cds2;Name=TRINITY_DN12383_c0_g1_i1;Parent=TRINITY_DN12383_c0_g1_i1.mrna1;Target=TRINITY_DN12383_c0_g1_i1 180 216 +
scaffold_1	Conpu1	CDS	955087	955244	100	-	0	ID=TRINITY_DN12383_c0_g1_i1.mrna1.cds1;Name=TRINITY_DN12383_c0_g1_i1;Parent=TRINITY_DN12383_c0_g1_i1.mrna1;Target=TRINITY_DN12383_c0_g1_i1 22 179 +
scaffold_1	Conpu1	exon	955087	955244	100	-	.	ID=TRINITY_DN12383_c0_g1_i1.mrna1.exon1;Name=TRINITY_DN12383_c0_g1_i1;Parent=TRINITY_DN12383_c0_g1_i1.mrna1;Target=TRINITY_DN12383_c0_g1_i1 22 179 +
scaffold_1	Conpu1	exon	956468	956595	100	-	.	ID=TRINITY_DN13131_c0_g1_i1.mrna1.exon2;Name=TRINITY_DN13131_c0_g1_i1;Parent=TRINITY_DN13131_c0_g1_i1.mrna1;Target=TRINITY_DN13131_c0_g1_i1 1 128 -
scaffold_1	Conpu1	gene	956468	956926	.	-	.	ID=TRINITY_DN13131_c0_g1_i1.path1;Name=TRINITY_DN13131_c0_g1_i1
scaffold_1	Conpu1	mRNA	956468	956926	.	-	.	ID=TRINITY_DN13131_c0_g1_i1.mrna1;Name=TRINITY_DN13131_c0_g1_i1;Parent=TRINITY_DN13131_c0_g1_i1.path1;coverage=100.0;identity=100.0;matches=400;mismatches=0;indels=0;unknowns=0
scaffold_1	Conpu1	exon	956655	956926	100	-	.	ID=TRINITY_DN13131_c0_g1_i1.mrna1.exon1;Name=TRINITY_DN13131_c0_g1_i1;Parent=TRINITY_DN13131_c0_g1_i1.mrna1;Target=TRINITY_DN13131_c0_g1_i1 129 400 -
scaffold_1	Conpu1	CDS	956731	956925	100	-	0	ID=TRINITY_DN13131_c0_g1_i1.mrna1.cds1;Name=TRINITY_DN13131_c0_g1_i1;Parent=TRINITY_DN13131_c0_g1_i1.mrna1;Target=TRINITY_DN13131_c0_g1_i1 205 399 .
scaffold_1	Conpu1	exon	972886	974008	100	-	.	ID=TRINITY_DN2282_c0_g1_i1.mrna1.exon1;Name=TRINITY_DN2282_c0_g1_i1;Parent=TRINITY_DN2282_c0_g1_i1.mrna1;Target=TRINITY_DN2282_c0_g1_i1 1123 1 .
scaffold_1	Conpu1	gene	972886	974008	.	-	.	ID=TRINITY_DN2282_c0_g1_i1.path1;Name=TRINITY_DN2282_c0_g1_i1
scaffold_1	Conpu1	mRNA	972886	974008	.	-	.	ID=TRINITY_DN2282_c0_g1_i1.mrna1;Name=TRINITY_DN2282_c0_g1_i1;Parent=TRINITY_DN2282_c0_g1_i1.path1;coverage=100.0;identity=100.0;matches=1123;mismatches=0;indels=0;unknowns=0
scaffold_1	Conpu1	CDS	973700	974008	100	-	0	ID=TRINITY_DN2282_c0_g1_i1.mrna1.cds1;Name=TRINITY_DN2282_c0_g1_i1;Parent=TRINITY_DN2282_c0_g1_i1.mrna1;Target=TRINITY_DN2282_c0_g1_i1 309 1 .
scaffold_1	Conpu1	exon	978939	979509	100	+	.	ID=TRINITY_DN14044_c0_g1_i1.mrna1.exon1;Name=TRINITY_DN14044_c0_g1_i1;Parent=TRINITY_DN14044_c0_g1_i1.mrna1;Target=TRINITY_DN14044_c0_g1_i1 571 1 .
scaffold_1	Conpu1	gene	978939	979509	.	+	.	ID=TRINITY_DN14044_c0_g1_i1.path1;Name=TRINITY_DN14044_c0_g1_i1
scaffold_1	Conpu1	mRNA	978939	979509	.	+	.	ID=TRINITY_DN14044_c0_g1_i1.mrna1;Name=TRINITY_DN14044_c0_g1_i1;Parent=TRINITY_DN14044_c0_g1_i1.path1;coverage=100.0;identity=100.0;matches=571;mismatches=0;indels=0;unknowns=0
scaffold_1	Conpu1	CDS	978940	979125	100	+	0	ID=TRINITY_DN14044_c0_g1_i1.mrna1.cds1;Name=TRINITY_DN14044_c0_g1_i1;Parent=TRINITY_DN14044_c0_g1_i1.mrna1;Target=TRINITY_DN14044_c0_g1_i1 187 2 .
scaffold_1	Conpu1	exon	985119	985443	100	-	.	ID=TRINITY_DN12495_c0_g1_i1.mrna1.exon1;Name=TRINITY_DN12495_c0_g1_i1;Parent=TRINITY_DN12495_c0_g1_i1.mrna1;Target=TRINITY_DN12495_c0_g1_i1 325 1 .
scaffold_1	Conpu1	gene	985119	985443	.	-	.	ID=TRINITY_DN12495_c0_g1_i1.path1;Name=TRINITY_DN12495_c0_g1_i1
scaffold_1	Conpu1	mRNA	985119	985443	.	-	.	ID=TRINITY_DN12495_c0_g1_i1.mrna1;Name=TRINITY_DN12495_c0_g1_i1;Parent=TRINITY_DN12495_c0_g1_i1.path1;coverage=100.0;identity=100.0;matches=325;mismatches=0;indels=0;unknowns=0
scaffold_1	Conpu1	CDS	985121	985192	100	-	0	ID=TRINITY_DN12495_c0_g1_i1.mrna1.cds1;Name=TRINITY_DN12495_c0_g1_i1;Parent=TRINITY_DN12495_c0_g1_i1.mrna1;Target=TRINITY_DN12495_c0_g1_i1 323 252 .
scaffold_1	Conpu1	exon	995242	995437	100	-	.	ID=TRINITY_DN16665_c0_g1_i1.mrna1.exon2;Name=TRINITY_DN16665_c0_g1_i1;Parent=TRINITY_DN16665_c0_g1_i1.mrna1;Target=TRINITY_DN16665_c0_g1_i1 227 32 .
scaffold_1	Conpu1	gene	995242	995515	.	-	.	ID=TRINITY_DN16665_c0_g1_i1.path1;Name=TRINITY_DN16665_c0_g1_i1
scaffold_1	Conpu1	mRNA	995242	995515	.	-	.	ID=TRINITY_DN16665_c0_g1_i1.mrna1;Name=TRINITY_DN16665_c0_g1_i1;Parent=TRINITY_DN16665_c0_g1_i1.path1;coverage=100.0;identity=100.0;matches=227;mismatches=0;indels=0;unknowns=0
scaffold_1	Conpu1	CDS	995244	995437	100	-	1	ID=TRINITY_DN16665_c0_g1_i1.mrna1.cds2;Name=TRINITY_DN16665_c0_g1_i1;Parent=TRINITY_DN16665_c0_g1_i1.mrna1;Target=TRINITY_DN16665_c0_g1_i1 225 32 .
scaffold_1	Conpu1	CDS	995485	995515	100	-	0	ID=TRINITY_DN16665_c0_g1_i1.mrna1.cds1;Name=TRINITY_DN16665_c0_g1_i1;Parent=TRINITY_DN16665_c0_g1_i1.mrna1;Target=TRINITY_DN16665_c0_g1_i1 31 1 .
scaffold_1	Conpu1	exon	995485	995515	100	-	.	ID=TRINITY_DN16665_c0_g1_i1.mrna1.exon1;Name=TRINITY_DN16665_c0_g1_i1;Parent=TRINITY_DN16665_c0_g1_i1.mrna1;Target=TRINITY_DN16665_c0_g1_i1 31 1 .
scaffold_1	Conpu1	exon	999131	999462	100	-	.	ID=TRINITY_DN6133_c0_g1_i1.mrna1.exon1;Name=TRINITY_DN6133_c0_g1_i1;Parent=TRINITY_DN6133_c0_g1_i1.mrna1;Target=TRINITY_DN6133_c0_g1_i1 342 11 .
scaffold_1	Conpu1	gene	999131	999462	.	-	.	ID=TRINITY_DN6133_c0_g1_i1.path1;Name=TRINITY_DN6133_c0_g1_i1
scaffold_1	Conpu1	mRNA	999131	999462	.	-	.	ID=TRINITY_DN6133_c0_g1_i1.mrna1;Name=TRINITY_DN6133_c0_g1_i1;Parent=TRINITY_DN6133_c0_g1_i1.path1;coverage=97.1;identity=100.0;matches=332;mismatches=0;indels=0;unknowns=0
scaffold_1	Conpu1	CDS	999314	999460	100	-	0	ID=TRINITY_DN6133_c0_g1_i1.mrna1.cds1;Name=TRINITY_DN6133_c0_g1_i1;Parent=TRINITY_DN6133_c0_g1_i1.mrna1;Target=TRINITY_DN6133_c0_g1_i1 159 13 .
scaffold_1	Conpu1	exon	1004653	1004940	100	+	.	ID=TRINITY_DN9243_c0_g1_i1.mrna1.exon1;Name=TRINITY_DN9243_c0_g1_i1;Parent=TRINITY_DN9243_c0_g1_i1.mrna1;Target=TRINITY_DN9243_c0_g1_i1 288 1 .
scaffold_1	Conpu1	gene	1004653	1004940	.	+	.	ID=TRINITY_DN9243_c0_g1_i1.path1;Name=TRINITY_DN9243_c0_g1_i1
scaffold_1	Conpu1	mRNA	1004653	1004940	.	+	.	ID=TRINITY_DN9243_c0_g1_i1.mrna1;Name=TRINITY_DN9243_c0_g1_i1;Parent=TRINITY_DN9243_c0_g1_i1.path1;coverage=100.0;identity=100.0;matches=288;mismatches=0;indels=0;unknowns=0
scaffold_1	Conpu1	CDS	1004655	1004864	100	+	0	ID=TRINITY_DN9243_c0_g1_i1.mrna1.cds1;Name=TRINITY_DN9243_c0_g1_i1;Parent=TRINITY_DN9243_c0_g1_i1.mrna1;Target=TRINITY_DN9243_c0_g1_i1 212 3 .
scaffold_1	Conpu1	CDS	1032547	1032756	100	+	0	ID=TRINITY_DN8384_c0_g1_i1.mrna1.cds1;Name=TRINITY_DN8384_c0_g1_i1;Parent=TRINITY_DN8384_c0_g1_i1.mrna1;Target=TRINITY_DN8384_c0_g1_i1 210 1 .
scaffold_1	Conpu1	exon	1032547	1032757	100	+	.	ID=TRINITY_DN8384_c0_g1_i1.mrna1.exon1;Name=TRINITY_DN8384_c0_g1_i1;Parent=TRINITY_DN8384_c0_g1_i1.mrna1;Target=TRINITY_DN8384_c0_g1_i1 211 1 .
scaffold_1	Conpu1	gene	1032547	1032757	.	+	.	ID=TRINITY_DN8384_c0_g1_i1.path1;Name=TRINITY_DN8384_c0_g1_i1
scaffold_1	Conpu1	mRNA	1032547	1032757	.	+	.	ID=TRINITY_DN8384_c0_g1_i1.mrna1;Name=TRINITY_DN8384_c0_g1_i1;Parent=TRINITY_DN8384_c0_g1_i1.path1;coverage=100.0;identity=100.0;matches=211;mismatches=0;indels=0;unknowns=0
scaffold_1	Conpu1	exon	1043958	1044531	100	+	.	ID=TRINITY_DN3839_c0_g1_i1.mrna1.exon1;Name=TRINITY_DN3839_c0_g1_i1;Parent=TRINITY_DN3839_c0_g1_i1.mrna1;Target=TRINITY_DN3839_c0_g1_i1 575 2 .
scaffold_1	Conpu1	gene	1043958	1044531	.	+	.	ID=TRINITY_DN3839_c0_g1_i1.path1;Name=TRINITY_DN3839_c0_g1_i1
scaffold_1	Conpu1	mRNA	1043958	1044531	.	+	.	ID=TRINITY_DN3839_c0_g1_i1.mrna1;Name=TRINITY_DN3839_c0_g1_i1;Parent=TRINITY_DN3839_c0_g1_i1.path1;coverage=99.8;identity=100.0;matches=574;mismatches=0;indels=0;unknowns=0
scaffold_1	Conpu1	CDS	1044235	1044468	100	+	0	ID=TRINITY_DN3839_c0_g1_i1.mrna1.cds1;Name=TRINITY_DN3839_c0_g1_i1;Parent=TRINITY_DN3839_c0_g1_i1.mrna1;Target=TRINITY_DN3839_c0_g1_i1 512 279 .
scaffold_1	Conpu1	exon	1045451	1046105	100	+	.	ID=TRINITY_DN5584_c0_g1_i1.mrna1.exon1;Name=TRINITY_DN5584_c0_g1_i1;Parent=TRINITY_DN5584_c0_g1_i1.mrna1;Target=TRINITY_DN5584_c0_g1_i1 655 1 .
scaffold_1	Conpu1	gene	1045451	1046105	.	+	.	ID=TRINITY_DN5584_c0_g1_i1.path1;Name=TRINITY_DN5584_c0_g1_i1
scaffold_1	Conpu1	mRNA	1045451	1046105	.	+	.	ID=TRINITY_DN5584_c0_g1_i1.mrna1;Name=TRINITY_DN5584_c0_g1_i1;Parent=TRINITY_DN5584_c0_g1_i1.path1;coverage=100.0;identity=100.0;matches=655;mismatches=0;indels=0;unknowns=0
scaffold_1	Conpu1	CDS	1045453	1045704	100	+	0	ID=TRINITY_DN5584_c0_g1_i1.mrna1.cds1;Name=TRINITY_DN5584_c0_g1_i1;Parent=TRINITY_DN5584_c0_g1_i1.mrna1;Target=TRINITY_DN5584_c0_g1_i1 254 3 .
scaffold_1	Conpu1	exon	1080050	1080258	100	+	.	ID=TRINITY_DN9499_c0_g1_i1.mrna1.exon1;Name=TRINITY_DN9499_c0_g1_i1;Parent=TRINITY_DN9499_c0_g1_i1.mrna1;Target=TRINITY_DN9499_c0_g1_i1 209 1 .
scaffold_1	Conpu1	gene	1080050	1080258	.	+	.	ID=TRINITY_DN9499_c0_g1_i1.path1;Name=TRINITY_DN9499_c0_g1_i1
scaffold_1	Conpu1	mRNA	1080050	1080258	.	+	.	ID=TRINITY_DN9499_c0_g1_i1.mrna1;Name=TRINITY_DN9499_c0_g1_i1;Parent=TRINITY_DN9499_c0_g1_i1.path1;coverage=100.0;identity=100.0;matches=209;mismatches=0;indels=0;unknowns=0
scaffold_1	Conpu1	CDS	1080112	1080186	100	+	0	ID=TRINITY_DN9499_c0_g1_i1.mrna1.cds1;Name=TRINITY_DN9499_c0_g1_i1;Parent=TRINITY_DN9499_c0_g1_i1.mrna1;Target=TRINITY_DN9499_c0_g1_i1 137 63 .
scaffold_1	Conpu1	exon	1090789	1091278	100	-	.	ID=TRINITY_DN11570_c0_g1_i1.mrna1.exon1;Name=TRINITY_DN11570_c0_g1_i1;Parent=TRINITY_DN11570_c0_g1_i1.mrna1;Target=TRINITY_DN11570_c0_g1_i1 490 1 .
scaffold_1	Conpu1	gene	1090789	1091278	.	-	.	ID=TRINITY_DN11570_c0_g1_i1.path1;Name=TRINITY_DN11570_c0_g1_i1
scaffold_1	Conpu1	mRNA	1090789	1091278	.	-	.	ID=TRINITY_DN11570_c0_g1_i1.mrna1;Name=TRINITY_DN11570_c0_g1_i1;Parent=TRINITY_DN11570_c0_g1_i1.path1;coverage=100.0;identity=100.0;matches=490;mismatches=0;indels=0;unknowns=0
scaffold_1	Conpu1	CDS	1091055	1091276	100	-	0	ID=TRINITY_DN11570_c0_g1_i1.mrna1.cds1;Name=TRINITY_DN11570_c0_g1_i1;Parent=TRINITY_DN11570_c0_g1_i1.mrna1;Target=TRINITY_DN11570_c0_g1_i1 224 3 .
scaffold_1	Conpu1	CDS	1123390	1123743	100	+	0	ID=TRINITY_DN2705_c0_g1_i1.mrna1.cds1;Name=TRINITY_DN2705_c0_g1_i1;Parent=TRINITY_DN2705_c0_g1_i1.mrna1;Target=TRINITY_DN2705_c0_g1_i1 376 23 .
scaffold_1	Conpu1	exon	1123390	1123743	100	+	.	ID=TRINITY_DN2705_c0_g1_i1.mrna1.exon1;Name=TRINITY_DN2705_c0_g1_i1;Parent=TRINITY_DN2705_c0_g1_i1.mrna1;Target=TRINITY_DN2705_c0_g1_i1 376 23 .
scaffold_1	Conpu1	gene	1123390	1123743	.	+	.	ID=TRINITY_DN2705_c0_g1_i1.path1;Name=TRINITY_DN2705_c0_g1_i1
scaffold_1	Conpu1	mRNA	1123390	1123743	.	+	.	ID=TRINITY_DN2705_c0_g1_i1.mrna1;Name=TRINITY_DN2705_c0_g1_i1;Parent=TRINITY_DN2705_c0_g1_i1.path1;coverage=94.1;identity=100.0;matches=354;mismatches=0;indels=0;unknowns=0
scaffold_1	Conpu1	exon	1125213	1125408	100	-	.	ID=TRINITY_DN60_c0_g2_i1.mrna1.exon1;Name=TRINITY_DN60_c0_g2_i1;Parent=TRINITY_DN60_c0_g2_i1.mrna1;Target=TRINITY_DN60_c0_g2_i1 199 4 .
scaffold_1	Conpu1	gene	1125213	1125408	.	-	.	ID=TRINITY_DN60_c0_g2_i1.path1;Name=TRINITY_DN60_c0_g2_i1
scaffold_1	Conpu1	mRNA	1125213	1125408	.	-	.	ID=TRINITY_DN60_c0_g2_i1.mrna1;Name=TRINITY_DN60_c0_g2_i1;Parent=TRINITY_DN60_c0_g2_i1.path1;coverage=91.6;identity=100.0;matches=196;mismatches=0;indels=0;unknowns=0
scaffold_1	Conpu1	CDS	1125214	1125408	100	-	0	ID=TRINITY_DN60_c0_g2_i1.mrna1.cds1;Name=TRINITY_DN60_c0_g2_i1;Parent=TRINITY_DN60_c0_g2_i1.mrna1;Target=TRINITY_DN60_c0_g2_i1 198 4 .
scaffold_1	Conpu1	CDS	1151399	1151503	100	+	0	ID=TRINITY_DN7353_c0_g1_i1.mrna1.cds1;Name=TRINITY_DN7353_c0_g1_i1;Parent=TRINITY_DN7353_c0_g1_i1.mrna1;Target=TRINITY_DN7353_c0_g1_i1 105 1 .
scaffold_1	Conpu1	exon	1151399	1151604	100	+	.	ID=TRINITY_DN7353_c0_g1_i1.mrna1.exon1;Name=TRINITY_DN7353_c0_g1_i1;Parent=TRINITY_DN7353_c0_g1_i1.mrna1;Target=TRINITY_DN7353_c0_g1_i1 206 1 .
scaffold_1	Conpu1	gene	1151399	1151604	.	+	.	ID=TRINITY_DN7353_c0_g1_i1.path1;Name=TRINITY_DN7353_c0_g1_i1
scaffold_1	Conpu1	mRNA	1151399	1151604	.	+	.	ID=TRINITY_DN7353_c0_g1_i1.mrna1;Name=TRINITY_DN7353_c0_g1_i1;Parent=TRINITY_DN7353_c0_g1_i1.path1;coverage=100.0;identity=100.0;matches=206;mismatches=0;indels=0;unknowns=0
scaffold_1	Conpu1	exon	1151914	1152156	100	-	.	ID=TRINITY_DN6172_c0_g1_i1.mrna1.exon2;Name=TRINITY_DN6172_c0_g1_i1;Parent=TRINITY_DN6172_c0_g1_i1.mrna1;Target=TRINITY_DN6172_c0_g1_i1 191 433 +
scaffold_1	Conpu1	gene	1151914	1152407	.	-	.	ID=TRINITY_DN6172_c0_g1_i1.path1;Name=TRINITY_DN6172_c0_g1_i1
scaffold_1	Conpu1	mRNA	1151914	1152407	.	-	.	ID=TRINITY_DN6172_c0_g1_i1.mrna1;Name=TRINITY_DN6172_c0_g1_i1;Parent=TRINITY_DN6172_c0_g1_i1.path1;coverage=100.0;identity=100.0;matches=433;mismatches=0;indels=0;unknowns=0
scaffold_1	Conpu1	CDS	1152006	1152156	100	-	2	ID=TRINITY_DN6172_c0_g1_i1.mrna1.cds2;Name=TRINITY_DN6172_c0_g1_i1;Parent=TRINITY_DN6172_c0_g1_i1.mrna1;Target=TRINITY_DN6172_c0_g1_i1 191 341 +
scaffold_1	Conpu1	CDS	1152218	1152291	100	-	0	ID=TRINITY_DN6172_c0_g1_i1.mrna1.cds1;Name=TRINITY_DN6172_c0_g1_i1;Parent=TRINITY_DN6172_c0_g1_i1.mrna1;Target=TRINITY_DN6172_c0_g1_i1 117 190 +
scaffold_1	Conpu1	exon	1152218	1152407	100	-	.	ID=TRINITY_DN6172_c0_g1_i1.mrna1.exon1;Name=TRINITY_DN6172_c0_g1_i1;Parent=TRINITY_DN6172_c0_g1_i1.mrna1;Target=TRINITY_DN6172_c0_g1_i1 1 190 +
scaffold_1	Conpu1	exon	1199924	1200211	100	-	.	ID=TRINITY_DN10878_c0_g1_i1.mrna1.exon3;Name=TRINITY_DN10878_c0_g1_i1;Parent=TRINITY_DN10878_c0_g1_i1.mrna1;Target=TRINITY_DN10878_c0_g1_i1 297 584 +
scaffold_1	Conpu1	gene	1199924	1200792	.	-	.	ID=TRINITY_DN10878_c0_g1_i1.path1;Name=TRINITY_DN10878_c0_g1_i1
scaffold_1	Conpu1	mRNA	1199924	1200792	.	-	.	ID=TRINITY_DN10878_c0_g1_i1.mrna1;Name=TRINITY_DN10878_c0_g1_i1;Parent=TRINITY_DN10878_c0_g1_i1.path1;coverage=100.0;identity=100.0;matches=584;mismatches=0;indels=0;unknowns=0
scaffold_1	Conpu1	CDS	1200047	1200166	100	-	0	ID=TRINITY_DN10878_c0_g1_i1.mrna1.cds1;Name=TRINITY_DN10878_c0_g1_i1;Parent=TRINITY_DN10878_c0_g1_i1.mrna1;Target=TRINITY_DN10878_c0_g1_i1 342 461 +
scaffold_1	Conpu1	exon	1200441	1200720	100	-	.	ID=TRINITY_DN10878_c0_g1_i1.mrna1.exon2;Name=TRINITY_DN10878_c0_g1_i1;Parent=TRINITY_DN10878_c0_g1_i1.mrna1;Target=TRINITY_DN10878_c0_g1_i1 17 296 +
scaffold_1	Conpu1	exon	1200777	1200792	100	-	.	ID=TRINITY_DN10878_c0_g1_i1.mrna1.exon1;Name=TRINITY_DN10878_c0_g1_i1;Parent=TRINITY_DN10878_c0_g1_i1.mrna1;Target=TRINITY_DN10878_c0_g1_i1 1 16 +
scaffold_1	Conpu1	exon	1346391	1346963	100	+	.	ID=TRINITY_DN13011_c0_g1_i1.mrna1.exon1;Name=TRINITY_DN13011_c0_g1_i1;Parent=TRINITY_DN13011_c0_g1_i1.mrna1;Target=TRINITY_DN13011_c0_g1_i1 573 1 .
scaffold_1	Conpu1	gene	1346391	1346963	.	+	.	ID=TRINITY_DN13011_c0_g1_i1.path1;Name=TRINITY_DN13011_c0_g1_i1
scaffold_1	Conpu1	mRNA	1346391	1346963	.	+	.	ID=TRINITY_DN13011_c0_g1_i1.mrna1;Name=TRINITY_DN13011_c0_g1_i1;Parent=TRINITY_DN13011_c0_g1_i1.path1;coverage=100.0;identity=100.0;matches=573;mismatches=0;indels=0;unknowns=0
scaffold_1	Conpu1	CDS	1346393	1346620	100	+	0	ID=TRINITY_DN13011_c0_g1_i1.mrna1.cds1;Name=TRINITY_DN13011_c0_g1_i1;Parent=TRINITY_DN13011_c0_g1_i1.mrna1;Target=TRINITY_DN13011_c0_g1_i1 230 3 .
scaffold_1	Conpu1	CDS	1381448	1381491	100	-	1	ID=TRINITY_DN9547_c0_g1_i1.mrna1.cds2;Name=TRINITY_DN9547_c0_g1_i1;Parent=TRINITY_DN9547_c0_g1_i1.mrna1;Target=TRINITY_DN9547_c0_g1_i1 1 44 .
scaffold_1	Conpu1	exon	1381448	1381491	100	-	.	ID=TRINITY_DN9547_c0_g1_i1.mrna1.exon2;Name=TRINITY_DN9547_c0_g1_i1;Parent=TRINITY_DN9547_c0_g1_i1.mrna1;Target=TRINITY_DN9547_c0_g1_i1 1 44 -
scaffold_1	Conpu1	gene	1381448	1381773	.	-	.	ID=TRINITY_DN9547_c0_g1_i1.path1;Name=TRINITY_DN9547_c0_g1_i1
scaffold_1	Conpu1	mRNA	1381448	1381773	.	-	.	ID=TRINITY_DN9547_c0_g1_i1.mrna1;Name=TRINITY_DN9547_c0_g1_i1;Parent=TRINITY_DN9547_c0_g1_i1.path1;coverage=100.0;identity=100.0;matches=264;mismatches=0;indels=0;unknowns=0
scaffold_1	Conpu1	CDS	1381554	1381773	100	-	0	ID=TRINITY_DN9547_c0_g1_i1.mrna1.cds1;Name=TRINITY_DN9547_c0_g1_i1;Parent=TRINITY_DN9547_c0_g1_i1.mrna1;Target=TRINITY_DN9547_c0_g1_i1 45 264 .
scaffold_1	Conpu1	exon	1381554	1381773	100	-	.	ID=TRINITY_DN9547_c0_g1_i1.mrna1.exon1;Name=TRINITY_DN9547_c0_g1_i1;Parent=TRINITY_DN9547_c0_g1_i1.mrna1;Target=TRINITY_DN9547_c0_g1_i1 45 264 -
scaffold_1	Conpu1	exon	1393503	1394023	100	-	.	ID=TRINITY_DN6439_c0_g1_i1.mrna1.exon1;Name=TRINITY_DN6439_c0_g1_i1;Parent=TRINITY_DN6439_c0_g1_i1.mrna1;Target=TRINITY_DN6439_c0_g1_i1 521 1 .
scaffold_1	Conpu1	gene	1393503	1394023	.	-	.	ID=TRINITY_DN6439_c0_g1_i1.path1;Name=TRINITY_DN6439_c0_g1_i1
scaffold_1	Conpu1	mRNA	1393503	1394023	.	-	.	ID=TRINITY_DN6439_c0_g1_i1.mrna1;Name=TRINITY_DN6439_c0_g1_i1;Parent=TRINITY_DN6439_c0_g1_i1.path1;coverage=99.8;identity=100.0;matches=521;mismatches=0;indels=0;unknowns=0
scaffold_1	Conpu1	CDS	1393874	1394023	100	-	0	ID=TRINITY_DN6439_c0_g1_i1.mrna1.cds1;Name=TRINITY_DN6439_c0_g1_i1;Parent=TRINITY_DN6439_c0_g1_i1.mrna1;Target=TRINITY_DN6439_c0_g1_i1 150 1 .
scaffold_1	Conpu1	exon	1434774	1435081	100	-	.	ID=TRINITY_DN9207_c0_g1_i1.mrna1.exon1;Name=TRINITY_DN9207_c0_g1_i1;Parent=TRINITY_DN9207_c0_g1_i1.mrna1;Target=TRINITY_DN9207_c0_g1_i1 308 1 .
scaffold_1	Conpu1	gene	1434774	1435081	.	-	.	ID=TRINITY_DN9207_c0_g1_i1.path1;Name=TRINITY_DN9207_c0_g1_i1
scaffold_1	Conpu1	mRNA	1434774	1435081	.	-	.	ID=TRINITY_DN9207_c0_g1_i1.mrna1;Name=TRINITY_DN9207_c0_g1_i1;Parent=TRINITY_DN9207_c0_g1_i1.path1;coverage=100.0;identity=100.0;matches=308;mismatches=0;indels=0;unknowns=0
scaffold_1	Conpu1	CDS	1434775	1434972	100	-	0	ID=TRINITY_DN9207_c0_g1_i1.mrna1.cds1;Name=TRINITY_DN9207_c0_g1_i1;Parent=TRINITY_DN9207_c0_g1_i1.mrna1;Target=TRINITY_DN9207_c0_g1_i1 307 110 .
scaffold_1	Conpu1	exon	1468676	1469045	100	-	.	ID=TRINITY_DN13129_c0_g1_i1.mrna1.exon1;Name=TRINITY_DN13129_c0_g1_i1;Parent=TRINITY_DN13129_c0_g1_i1.mrna1;Target=TRINITY_DN13129_c0_g1_i1 370 1 .
scaffold_1	Conpu1	gene	1468676	1469045	.	-	.	ID=TRINITY_DN13129_c0_g1_i1.path1;Name=TRINITY_DN13129_c0_g1_i1
scaffold_1	Conpu1	mRNA	1468676	1469045	.	-	.	ID=TRINITY_DN13129_c0_g1_i1.mrna1;Name=TRINITY_DN13129_c0_g1_i1;Parent=TRINITY_DN13129_c0_g1_i1.path1;coverage=100.0;identity=100.0;matches=370;mismatches=0;indels=0;unknowns=0
scaffold_1	Conpu1	CDS	1468794	1469045	100	-	0	ID=TRINITY_DN13129_c0_g1_i1.mrna1.cds1;Name=TRINITY_DN13129_c0_g1_i1;Parent=TRINITY_DN13129_c0_g1_i1.mrna1;Target=TRINITY_DN13129_c0_g1_i1 252 1 .
scaffold_1	Conpu1	exon	1473344	1473569	100	+	.	ID=TRINITY_DN6452_c0_g1_i1.mrna1.exon1;Name=TRINITY_DN6452_c0_g1_i1;Parent=TRINITY_DN6452_c0_g1_i1.mrna1;Target=TRINITY_DN6452_c0_g1_i1 16 241 -
scaffold_1	Conpu1	gene	1473344	1473655	.	+	.	ID=TRINITY_DN6452_c0_g1_i1.path1;Name=TRINITY_DN6452_c0_g1_i1
scaffold_1	Conpu1	mRNA	1473344	1473655	.	+	.	ID=TRINITY_DN6452_c0_g1_i1.mrna1;Name=TRINITY_DN6452_c0_g1_i1;Parent=TRINITY_DN6452_c0_g1_i1.path1;coverage=100.0;identity=100.0;matches=241;mismatches=0;indels=0;unknowns=0
scaffold_1	Conpu1	CDS	1473508	1473569	100	+	0	ID=TRINITY_DN6452_c0_g1_i1.mrna1.cds1;Name=TRINITY_DN6452_c0_g1_i1;Parent=TRINITY_DN6452_c0_g1_i1.mrna1;Target=TRINITY_DN6452_c0_g1_i1 16 77 .
scaffold_1	Conpu1	CDS	1473641	1473653	100	+	2	ID=TRINITY_DN6452_c0_g1_i1.mrna1.cds2;Name=TRINITY_DN6452_c0_g1_i1;Parent=TRINITY_DN6452_c0_g1_i1.mrna1;Target=TRINITY_DN6452_c0_g1_i1 3 15 .
scaffold_1	Conpu1	exon	1473641	1473655	100	+	.	ID=TRINITY_DN6452_c0_g1_i1.mrna1.exon2;Name=TRINITY_DN6452_c0_g1_i1;Parent=TRINITY_DN6452_c0_g1_i1.mrna1;Target=TRINITY_DN6452_c0_g1_i1 1 15 -
scaffold_1	Conpu1	exon	1572496	1572666	100	+	.	ID=TRINITY_DN2738_c0_g1_i1.mrna1.exon1;Name=TRINITY_DN2738_c0_g1_i1;Parent=TRINITY_DN2738_c0_g1_i1.mrna1;Target=TRINITY_DN2738_c0_g1_i1 268 438 -
scaffold_1	Conpu1	gene	1572496	1573039	.	+	.	ID=TRINITY_DN2738_c0_g1_i1.path1;Name=TRINITY_DN2738_c0_g1_i1
scaffold_1	Conpu1	mRNA	1572496	1573039	.	+	.	ID=TRINITY_DN2738_c0_g1_i1.mrna1;Name=TRINITY_DN2738_c0_g1_i1;Parent=TRINITY_DN2738_c0_g1_i1.path1;coverage=97.0;identity=100.0;matches=425;mismatches=0;indels=0;unknowns=0
scaffold_1	Conpu1	CDS	1572497	1572580	100	+	0	ID=TRINITY_DN2738_c0_g1_i1.mrna1.cds1;Name=TRINITY_DN2738_c0_g1_i1;Parent=TRINITY_DN2738_c0_g1_i1.mrna1;Target=TRINITY_DN2738_c0_g1_i1 354 437 .
scaffold_1	Conpu1	exon	1572730	1572806	100	+	.	ID=TRINITY_DN2738_c0_g1_i1.mrna1.exon2;Name=TRINITY_DN2738_c0_g1_i1;Parent=TRINITY_DN2738_c0_g1_i1.mrna1;Target=TRINITY_DN2738_c0_g1_i1 191 267 -
scaffold_1	Conpu1	exon	1572863	1573039	100	+	.	ID=TRINITY_DN2738_c0_g1_i1.mrna1.exon3;Name=TRINITY_DN2738_c0_g1_i1;Parent=TRINITY_DN2738_c0_g1_i1.mrna1;Target=TRINITY_DN2738_c0_g1_i1 14 190 -
scaffold_1	Conpu1	exon	1600082	1600378	100	+	.	ID=TRINITY_DN16711_c0_g1_i1.mrna1.exon1;Name=TRINITY_DN16711_c0_g1_i1;Parent=TRINITY_DN16711_c0_g1_i1.mrna1;Target=TRINITY_DN16711_c0_g1_i1 306 10 .
scaffold_1	Conpu1	gene	1600082	1600378	.	+	.	ID=TRINITY_DN16711_c0_g1_i1.path1;Name=TRINITY_DN16711_c0_g1_i1
scaffold_1	Conpu1	mRNA	1600082	1600378	.	+	.	ID=TRINITY_DN16711_c0_g1_i1.mrna1;Name=TRINITY_DN16711_c0_g1_i1;Parent=TRINITY_DN16711_c0_g1_i1.path1;coverage=97.1;identity=100.0;matches=297;mismatches=0;indels=0;unknowns=0
scaffold_1	Conpu1	CDS	1600243	1600338	100	+	0	ID=TRINITY_DN16711_c0_g1_i1.mrna1.cds1;Name=TRINITY_DN16711_c0_g1_i1;Parent=TRINITY_DN16711_c0_g1_i1.mrna1;Target=TRINITY_DN16711_c0_g1_i1 266 171 .
scaffold_1	Conpu1	exon	1630418	1630859	100	-	.	ID=TRINITY_DN16138_c0_g1_i1.mrna1.exon1;Name=TRINITY_DN16138_c0_g1_i1;Parent=TRINITY_DN16138_c0_g1_i1.mrna1;Target=TRINITY_DN16138_c0_g1_i1 442 1 .
scaffold_1	Conpu1	gene	1630418	1630859	.	-	.	ID=TRINITY_DN16138_c0_g1_i1.path1;Name=TRINITY_DN16138_c0_g1_i1
scaffold_1	Conpu1	mRNA	1630418	1630859	.	-	.	ID=TRINITY_DN16138_c0_g1_i1.mrna1;Name=TRINITY_DN16138_c0_g1_i1;Parent=TRINITY_DN16138_c0_g1_i1.path1;coverage=100.0;identity=100.0;matches=442;mismatches=0;indels=0;unknowns=0
scaffold_1	Conpu1	CDS	1630648	1630857	100	-	0	ID=TRINITY_DN16138_c0_g1_i1.mrna1.cds1;Name=TRINITY_DN16138_c0_g1_i1;Parent=TRINITY_DN16138_c0_g1_i1.mrna1;Target=TRINITY_DN16138_c0_g1_i1 212 3 .
scaffold_1	Conpu1	exon	1630820	1631023	99	-	.	ID=TRINITY_DN13935_c0_g1_i1.mrna1.exon1;Name=TRINITY_DN13935_c0_g1_i1;Parent=TRINITY_DN13935_c0_g1_i1.mrna1;Target=TRINITY_DN13935_c0_g1_i1 204 1 .
scaffold_1	Conpu1	gene	1630820	1631023	.	-	.	ID=TRINITY_DN13935_c0_g1_i1.path1;Name=TRINITY_DN13935_c0_g1_i1
scaffold_1	Conpu1	mRNA	1630820	1631023	.	-	.	ID=TRINITY_DN13935_c0_g1_i1.mrna1;Name=TRINITY_DN13935_c0_g1_i1;Parent=TRINITY_DN13935_c0_g1_i1.path1;coverage=100.0;identity=99.5;matches=203;mismatches=1;indels=0;unknowns=0
scaffold_1	Conpu1	CDS	1630822	1631022	99	-	0	ID=TRINITY_DN13935_c0_g1_i1.mrna1.cds1;Name=TRINITY_DN13935_c0_g1_i1;Parent=TRINITY_DN13935_c0_g1_i1.mrna1;Target=TRINITY_DN13935_c0_g1_i1 202 2 .
scaffold_1	Conpu1	exon	1632343	1632453	100	+	.	ID=TRINITY_DN4977_c1_g1_i1.mrna1.exon1;Name=TRINITY_DN4977_c1_g1_i1;Parent=TRINITY_DN4977_c1_g1_i1.mrna1;Target=TRINITY_DN4977_c1_g1_i1 379 489 -
scaffold_1	Conpu1	gene	1632343	1632960	.	+	.	ID=TRINITY_DN4977_c1_g1_i1.path1;Name=TRINITY_DN4977_c1_g1_i1
scaffold_1	Conpu1	mRNA	1632343	1632960	.	+	.	ID=TRINITY_DN4977_c1_g1_i1.mrna1;Name=TRINITY_DN4977_c1_g1_i1;Parent=TRINITY_DN4977_c1_g1_i1.path1;coverage=100.0;identity=100.0;matches=489;mismatches=0;indels=0;unknowns=0
scaffold_1	Conpu1	exon	1632515	1632869	100	+	.	ID=TRINITY_DN4977_c1_g1_i1.mrna1.exon2;Name=TRINITY_DN4977_c1_g1_i1;Parent=TRINITY_DN4977_c1_g1_i1.mrna1;Target=TRINITY_DN4977_c1_g1_i1 24 378 -
scaffold_1	Conpu1	CDS	1632545	1632727	100	+	0	ID=TRINITY_DN4977_c1_g1_i1.mrna1.cds1;Name=TRINITY_DN4977_c1_g1_i1;Parent=TRINITY_DN4977_c1_g1_i1.mrna1;Target=TRINITY_DN4977_c1_g1_i1 166 348 .
scaffold_1	Conpu1	exon	1632865	1633034	100	+	.	ID=TRINITY_DN4977_c0_g1_i1.mrna1.exon1;Name=TRINITY_DN4977_c0_g1_i1;Parent=TRINITY_DN4977_c0_g1_i1.mrna1;Target=TRINITY_DN4977_c0_g1_i1 1 170 +
scaffold_1	Conpu1	gene	1632865	1633997	.	+	.	ID=TRINITY_DN4977_c0_g1_i1.path1;Name=TRINITY_DN4977_c0_g1_i1
scaffold_1	Conpu1	mRNA	1632865	1633997	.	+	.	ID=TRINITY_DN4977_c0_g1_i1.mrna1;Name=TRINITY_DN4977_c0_g1_i1;Parent=TRINITY_DN4977_c0_g1_i1.path1;coverage=100.0;identity=100.0;matches=959;mismatches=0;indels=0;unknowns=0
scaffold_1	Conpu1	exon	1632938	1632960	100	+	.	ID=TRINITY_DN4977_c1_g1_i1.mrna1.exon3;Name=TRINITY_DN4977_c1_g1_i1;Parent=TRINITY_DN4977_c1_g1_i1.mrna1;Target=TRINITY_DN4977_c1_g1_i1 1 23 -
scaffold_1	Conpu1	exon	1633089	1633412	100	+	.	ID=TRINITY_DN4977_c0_g1_i1.mrna1.exon2;Name=TRINITY_DN4977_c0_g1_i1;Parent=TRINITY_DN4977_c0_g1_i1.mrna1;Target=TRINITY_DN4977_c0_g1_i1 171 494 +
scaffold_1	Conpu1	CDS	1633286	1633412	100	+	0	ID=TRINITY_DN4977_c0_g1_i1.mrna1.cds1;Name=TRINITY_DN4977_c0_g1_i1;Parent=TRINITY_DN4977_c0_g1_i1.mrna1;Target=TRINITY_DN4977_c0_g1_i1 368 494 +
scaffold_1	Conpu1	CDS	1633482	1633555	100	+	1	ID=TRINITY_DN4977_c0_g1_i1.mrna1.cds2;Name=TRINITY_DN4977_c0_g1_i1;Parent=TRINITY_DN4977_c0_g1_i1.mrna1;Target=TRINITY_DN4977_c0_g1_i1 495 568 +
scaffold_1	Conpu1	exon	1633482	1633682	100	+	.	ID=TRINITY_DN4977_c0_g1_i1.mrna1.exon3;Name=TRINITY_DN4977_c0_g1_i1;Parent=TRINITY_DN4977_c0_g1_i1.mrna1;Target=TRINITY_DN4977_c0_g1_i1 495 695 +
scaffold_1	Conpu1	exon	1633734	1633997	100	+	.	ID=TRINITY_DN4977_c0_g1_i1.mrna1.exon4;Name=TRINITY_DN4977_c0_g1_i1;Parent=TRINITY_DN4977_c0_g1_i1.mrna1;Target=TRINITY_DN4977_c0_g1_i1 696 959 +
scaffold_1	Conpu1	CDS	1665557	1665659	100	+	0	ID=TRINITY_DN16401_c0_g1_i1.mrna1.cds1;Name=TRINITY_DN16401_c0_g1_i1;Parent=TRINITY_DN16401_c0_g1_i1.mrna1;Target=TRINITY_DN16401_c0_g1_i1 175 277 .
scaffold_1	Conpu1	exon	1665557	1665659	100	+	.	ID=TRINITY_DN16401_c0_g1_i1.mrna1.exon1;Name=TRINITY_DN16401_c0_g1_i1;Parent=TRINITY_DN16401_c0_g1_i1.mrna1;Target=TRINITY_DN16401_c0_g1_i1 175 277 -
scaffold_1	Conpu1	gene	1665557	1665944	.	+	.	ID=TRINITY_DN16401_c0_g1_i1.path1;Name=TRINITY_DN16401_c0_g1_i1
scaffold_1	Conpu1	mRNA	1665557	1665944	.	+	.	ID=TRINITY_DN16401_c0_g1_i1.mrna1;Name=TRINITY_DN16401_c0_g1_i1;Parent=TRINITY_DN16401_c0_g1_i1.path1;coverage=100.0;identity=100.0;matches=277;mismatches=0;indels=0;unknowns=0
scaffold_1	Conpu1	CDS	1665711	1665715	100	+	1	ID=TRINITY_DN16401_c0_g1_i1.mrna1.cds2;Name=TRINITY_DN16401_c0_g1_i1;Parent=TRINITY_DN16401_c0_g1_i1.mrna1;Target=TRINITY_DN16401_c0_g1_i1 170 174 .
scaffold_1	Conpu1	exon	1665711	1665827	100	+	.	ID=TRINITY_DN16401_c0_g1_i1.mrna1.exon2;Name=TRINITY_DN16401_c0_g1_i1;Parent=TRINITY_DN16401_c0_g1_i1.mrna1;Target=TRINITY_DN16401_c0_g1_i1 58 174 -
scaffold_1	Conpu1	exon	1665888	1665944	100	+	.	ID=TRINITY_DN16401_c0_g1_i1.mrna1.exon3;Name=TRINITY_DN16401_c0_g1_i1;Parent=TRINITY_DN16401_c0_g1_i1.mrna1;Target=TRINITY_DN16401_c0_g1_i1 1 57 -
scaffold_1	Conpu1	exon	1701518	1701550	100	+	.	ID=TRINITY_DN15225_c0_g1_i1.mrna1.exon1;Name=TRINITY_DN15225_c0_g1_i1;Parent=TRINITY_DN15225_c0_g1_i1.mrna1;Target=TRINITY_DN15225_c0_g1_i1 1 33 +
scaffold_1	Conpu1	gene	1701518	1702469	.	+	.	ID=TRINITY_DN15225_c0_g1_i1.path1;Name=TRINITY_DN15225_c0_g1_i1
scaffold_1	Conpu1	mRNA	1701518	1702469	.	+	.	ID=TRINITY_DN15225_c0_g1_i1.mrna1;Name=TRINITY_DN15225_c0_g1_i1;Parent=TRINITY_DN15225_c0_g1_i1.path1;coverage=100.0;identity=100.0;matches=709;mismatches=0;indels=0;unknowns=0
scaffold_1	Conpu1	exon	1701603	1701755	100	+	.	ID=TRINITY_DN15225_c0_g1_i1.mrna1.exon2;Name=TRINITY_DN15225_c0_g1_i1;Parent=TRINITY_DN15225_c0_g1_i1.mrna1;Target=TRINITY_DN15225_c0_g1_i1 34 186 +
scaffold_1	Conpu1	exon	1701823	1701995	100	+	.	ID=TRINITY_DN15225_c0_g1_i1.mrna1.exon3;Name=TRINITY_DN15225_c0_g1_i1;Parent=TRINITY_DN15225_c0_g1_i1.mrna1;Target=TRINITY_DN15225_c0_g1_i1 187 359 +
scaffold_1	Conpu1	CDS	1701934	1701995	100	+	0	ID=TRINITY_DN15225_c0_g1_i1.mrna1.cds1;Name=TRINITY_DN15225_c0_g1_i1;Parent=TRINITY_DN15225_c0_g1_i1.mrna1;Target=TRINITY_DN15225_c0_g1_i1 298 359 +
scaffold_1	Conpu1	CDS	1702066	1702117	100	+	2	ID=TRINITY_DN15225_c0_g1_i1.mrna1.cds2;Name=TRINITY_DN15225_c0_g1_i1;Parent=TRINITY_DN15225_c0_g1_i1.mrna1;Target=TRINITY_DN15225_c0_g1_i1 360 411 +
scaffold_1	Conpu1	exon	1702066	1702117	100	+	.	ID=TRINITY_DN15225_c0_g1_i1.mrna1.exon4;Name=TRINITY_DN15225_c0_g1_i1;Parent=TRINITY_DN15225_c0_g1_i1.mrna1;Target=TRINITY_DN15225_c0_g1_i1 360 411 +
scaffold_1	Conpu1	CDS	1702172	1702249	100	+	0	ID=TRINITY_DN15225_c0_g1_i1.mrna1.cds3;Name=TRINITY_DN15225_c0_g1_i1;Parent=TRINITY_DN15225_c0_g1_i1.mrna1;Target=TRINITY_DN15225_c0_g1_i1 412 489 +
scaffold_1	Conpu1	exon	1702172	1702469	100	+	.	ID=TRINITY_DN15225_c0_g1_i1.mrna1.exon5;Name=TRINITY_DN15225_c0_g1_i1;Parent=TRINITY_DN15225_c0_g1_i1.mrna1;Target=TRINITY_DN15225_c0_g1_i1 412 709 +
scaffold_1	Conpu1	CDS	1708993	1709196	100	+	0	ID=TRINITY_DN15333_c0_g1_i1.mrna1.cds1;Name=TRINITY_DN15333_c0_g1_i1;Parent=TRINITY_DN15333_c0_g1_i1.mrna1;Target=TRINITY_DN15333_c0_g1_i1 204 1 .
scaffold_1	Conpu1	exon	1708993	1709304	100	+	.	ID=TRINITY_DN15333_c0_g1_i1.mrna1.exon1;Name=TRINITY_DN15333_c0_g1_i1;Parent=TRINITY_DN15333_c0_g1_i1.mrna1;Target=TRINITY_DN15333_c0_g1_i1 312 1 .
scaffold_1	Conpu1	gene	1708993	1709304	.	+	.	ID=TRINITY_DN15333_c0_g1_i1.path1;Name=TRINITY_DN15333_c0_g1_i1
scaffold_1	Conpu1	mRNA	1708993	1709304	.	+	.	ID=TRINITY_DN15333_c0_g1_i1.mrna1;Name=TRINITY_DN15333_c0_g1_i1;Parent=TRINITY_DN15333_c0_g1_i1.path1;coverage=100.0;identity=100.0;matches=312;mismatches=0;indels=0;unknowns=0
scaffold_1	Conpu1	exon	1709269	1709563	99	+	.	ID=TRINITY_DN14310_c0_g1_i1.mrna1.exon1;Name=TRINITY_DN14310_c0_g1_i1;Parent=TRINITY_DN14310_c0_g1_i1.mrna1;Target=TRINITY_DN14310_c0_g1_i1 4 298 +
scaffold_1	Conpu1	gene	1709269	1709648	.	+	.	ID=TRINITY_DN14310_c0_g1_i1.path1;Name=TRINITY_DN14310_c0_g1_i1
scaffold_1	Conpu1	mRNA	1709269	1709648	.	+	.	ID=TRINITY_DN14310_c0_g1_i1.mrna1;Name=TRINITY_DN14310_c0_g1_i1;Parent=TRINITY_DN14310_c0_g1_i1.path1;coverage=99.1;identity=99.4;matches=327;mismatches=2;indels=0;unknowns=0
scaffold_1	Conpu1	CDS	1709400	1709563	100	+	0	ID=TRINITY_DN14310_c0_g1_i1.mrna1.cds1;Name=TRINITY_DN14310_c0_g1_i1;Parent=TRINITY_DN14310_c0_g1_i1.mrna1;Target=TRINITY_DN14310_c0_g1_i1 135 298 +
scaffold_1	Conpu1	CDS	1709615	1709648	100	+	2	ID=TRINITY_DN14310_c0_g1_i1.mrna1.cds2;Name=TRINITY_DN14310_c0_g1_i1;Parent=TRINITY_DN14310_c0_g1_i1.mrna1;Target=TRINITY_DN14310_c0_g1_i1 299 332 +
scaffold_1	Conpu1	exon	1709615	1709648	100	+	.	ID=TRINITY_DN14310_c0_g1_i1.mrna1.exon2;Name=TRINITY_DN14310_c0_g1_i1;Parent=TRINITY_DN14310_c0_g1_i1.mrna1;Target=TRINITY_DN14310_c0_g1_i1 299 332 +
scaffold_1	Conpu1	exon	1734419	1734981	100	-	.	ID=TRINITY_DN15542_c0_g1_i1.mrna1.exon1;Name=TRINITY_DN15542_c0_g1_i1;Parent=TRINITY_DN15542_c0_g1_i1.mrna1;Target=TRINITY_DN15542_c0_g1_i1 563 1 .
scaffold_1	Conpu1	gene	1734419	1734981	.	-	.	ID=TRINITY_DN15542_c0_g1_i1.path1;Name=TRINITY_DN15542_c0_g1_i1
scaffold_1	Conpu1	mRNA	1734419	1734981	.	-	.	ID=TRINITY_DN15542_c0_g1_i1.mrna1;Name=TRINITY_DN15542_c0_g1_i1;Parent=TRINITY_DN15542_c0_g1_i1.path1;coverage=100.0;identity=100.0;matches=563;mismatches=0;indels=0;unknowns=0
scaffold_1	Conpu1	CDS	1734469	1734663	100	-	0	ID=TRINITY_DN15542_c0_g1_i1.mrna1.cds1;Name=TRINITY_DN15542_c0_g1_i1;Parent=TRINITY_DN15542_c0_g1_i1.mrna1;Target=TRINITY_DN15542_c0_g1_i1 513 319 .
scaffold_1	Conpu1	exon	1786661	1786904	99	-	.	ID=TRINITY_DN6906_c0_g1_i1.mrna1.exon1;Name=TRINITY_DN6906_c0_g1_i1;Parent=TRINITY_DN6906_c0_g1_i1.mrna1;Target=TRINITY_DN6906_c0_g1_i1 277 34 .
scaffold_1	Conpu1	gene	1786661	1786904	.	-	.	ID=TRINITY_DN6906_c0_g1_i1.path1;Name=TRINITY_DN6906_c0_g1_i1
scaffold_1	Conpu1	mRNA	1786661	1786904	.	-	.	ID=TRINITY_DN6906_c0_g1_i1.mrna1;Name=TRINITY_DN6906_c0_g1_i1;Parent=TRINITY_DN6906_c0_g1_i1.path1;coverage=85.0;identity=99.6;matches=243;mismatches=1;indels=0;unknowns=0
scaffold_1	Conpu1	CDS	1786789	1786902	99	-	0	ID=TRINITY_DN6906_c0_g1_i1.mrna1.cds1;Name=TRINITY_DN6906_c0_g1_i1;Parent=TRINITY_DN6906_c0_g1_i1.mrna1;Target=TRINITY_DN6906_c0_g1_i1 149 36 .
scaffold_1	Conpu1	exon	1787732	1788488	100	-	.	ID=TRINITY_DN7687_c0_g1_i1.mrna1.exon1;Name=TRINITY_DN7687_c0_g1_i1;Parent=TRINITY_DN7687_c0_g1_i1.mrna1;Target=TRINITY_DN7687_c0_g1_i1 757 1 .
scaffold_1	Conpu1	gene	1787732	1788488	.	-	.	ID=TRINITY_DN7687_c0_g1_i1.path1;Name=TRINITY_DN7687_c0_g1_i1
scaffold_1	Conpu1	mRNA	1787732	1788488	.	-	.	ID=TRINITY_DN7687_c0_g1_i1.mrna1;Name=TRINITY_DN7687_c0_g1_i1;Parent=TRINITY_DN7687_c0_g1_i1.path1;coverage=100.0;identity=100.0;matches=757;mismatches=0;indels=0;unknowns=0
scaffold_1	Conpu1	CDS	1787857	1788078	100	-	0	ID=TRINITY_DN7687_c0_g1_i1.mrna1.cds1;Name=TRINITY_DN7687_c0_g1_i1;Parent=TRINITY_DN7687_c0_g1_i1.mrna1;Target=TRINITY_DN7687_c0_g1_i1 632 411 .
scaffold_1	Conpu1	CDS	1826520	1826543	100	-	0	ID=TRINITY_DN2626_c1_g1_i1.mrna1.cds2;Name=TRINITY_DN2626_c1_g1_i1;Parent=TRINITY_DN2626_c1_g1_i1.mrna1;Target=TRINITY_DN2626_c1_g1_i1 1 24 .
scaffold_1	Conpu1	exon	1826520	1826543	100	-	.	ID=TRINITY_DN2626_c1_g1_i1.mrna1.exon2;Name=TRINITY_DN2626_c1_g1_i1;Parent=TRINITY_DN2626_c1_g1_i1.mrna1;Target=TRINITY_DN2626_c1_g1_i1 1 24 -
scaffold_1	Conpu1	gene	1826520	1826808	.	-	.	ID=TRINITY_DN2626_c1_g1_i1.path1;Name=TRINITY_DN2626_c1_g1_i1
scaffold_1	Conpu1	mRNA	1826520	1826808	.	-	.	ID=TRINITY_DN2626_c1_g1_i1.mrna1;Name=TRINITY_DN2626_c1_g1_i1;Parent=TRINITY_DN2626_c1_g1_i1.path1;coverage=97.4;identity=100.0;matches=227;mismatches=0;indels=0;unknowns=0
scaffold_1	Conpu1	CDS	1826606	1826806	100	-	0	ID=TRINITY_DN2626_c1_g1_i1.mrna1.cds1;Name=TRINITY_DN2626_c1_g1_i1;Parent=TRINITY_DN2626_c1_g1_i1.mrna1;Target=TRINITY_DN2626_c1_g1_i1 25 225 .
scaffold_1	Conpu1	exon	1826606	1826808	100	-	.	ID=TRINITY_DN2626_c1_g1_i1.mrna1.exon1;Name=TRINITY_DN2626_c1_g1_i1;Parent=TRINITY_DN2626_c1_g1_i1.mrna1;Target=TRINITY_DN2626_c1_g1_i1 25 227 -
scaffold_1	Conpu1	CDS	1891516	1891619	98	+	0	ID=TRINITY_DN13308_c0_g1_i1.mrna1.cds1;Name=TRINITY_DN13308_c0_g1_i1;Parent=TRINITY_DN13308_c0_g1_i1.mrna1;Target=TRINITY_DN13308_c0_g1_i1 105 1 .
scaffold_1	Conpu1	exon	1891516	1891757	99	+	.	ID=TRINITY_DN13308_c0_g1_i1.mrna1.exon1;Name=TRINITY_DN13308_c0_g1_i1;Parent=TRINITY_DN13308_c0_g1_i1.mrna1;Target=TRINITY_DN13308_c0_g1_i1 243 1 .
scaffold_1	Conpu1	gene	1891516	1891757	.	+	.	ID=TRINITY_DN13308_c0_g1_i1.path1;Name=TRINITY_DN13308_c0_g1_i1
scaffold_1	Conpu1	mRNA	1891516	1891757	.	+	.	ID=TRINITY_DN13308_c0_g1_i1.mrna1;Name=TRINITY_DN13308_c0_g1_i1;Parent=TRINITY_DN13308_c0_g1_i1.path1;coverage=100.0;identity=99.2;matches=241;mismatches=1;indels=1;unknowns=0
scaffold_1	Conpu1	CDS	1913338	1913515	98	+	0	ID=TRINITY_DN8192_c0_g1_i1.mrna1.cds1;Name=TRINITY_DN8192_c0_g1_i1;Parent=TRINITY_DN8192_c0_g1_i1.mrna1;Target=TRINITY_DN8192_c0_g1_i1 10 187 +
scaffold_1	Conpu1	exon	1913338	1913515	98	+	.	ID=TRINITY_DN8192_c0_g1_i1.mrna1.exon1;Name=TRINITY_DN8192_c0_g1_i1;Parent=TRINITY_DN8192_c0_g1_i1.mrna1;Target=TRINITY_DN8192_c0_g1_i1 10 187 +
scaffold_1	Conpu1	gene	1913338	1913674	.	+	.	ID=TRINITY_DN8192_c0_g1_i1.path1;Name=TRINITY_DN8192_c0_g1_i1
scaffold_1	Conpu1	mRNA	1913338	1913674	.	+	.	ID=TRINITY_DN8192_c0_g1_i1.mrna1;Name=TRINITY_DN8192_c0_g1_i1;Parent=TRINITY_DN8192_c0_g1_i1.path1;coverage=96.9;identity=99.3;matches=282;mismatches=2;indels=0;unknowns=0
scaffold_1	Conpu1	CDS	1913569	1913672	100	+	1	ID=TRINITY_DN8192_c0_g1_i1.mrna1.cds2;Name=TRINITY_DN8192_c0_g1_i1;Parent=TRINITY_DN8192_c0_g1_i1.mrna1;Target=TRINITY_DN8192_c0_g1_i1 188 291 +
scaffold_1	Conpu1	exon	1913569	1913674	100	+	.	ID=TRINITY_DN8192_c0_g1_i1.mrna1.exon2;Name=TRINITY_DN8192_c0_g1_i1;Parent=TRINITY_DN8192_c0_g1_i1.mrna1;Target=TRINITY_DN8192_c0_g1_i1 188 293 +
scaffold_1	Conpu1	exon	1943347	1943608	100	+	.	ID=TRINITY_DN9308_c0_g1_i1.mrna1.exon1;Name=TRINITY_DN9308_c0_g1_i1;Parent=TRINITY_DN9308_c0_g1_i1.mrna1;Target=TRINITY_DN9308_c0_g1_i1 262 1 .
scaffold_1	Conpu1	gene	1943347	1943608	.	+	.	ID=TRINITY_DN9308_c0_g1_i1.path1;Name=TRINITY_DN9308_c0_g1_i1
scaffold_1	Conpu1	mRNA	1943347	1943608	.	+	.	ID=TRINITY_DN9308_c0_g1_i1.mrna1;Name=TRINITY_DN9308_c0_g1_i1;Parent=TRINITY_DN9308_c0_g1_i1.path1;coverage=100.0;identity=100.0;matches=262;mismatches=0;indels=0;unknowns=0
scaffold_1	Conpu1	CDS	1943348	1943608	100	+	0	ID=TRINITY_DN9308_c0_g1_i1.mrna1.cds1;Name=TRINITY_DN9308_c0_g1_i1;Parent=TRINITY_DN9308_c0_g1_i1.mrna1;Target=TRINITY_DN9308_c0_g1_i1 262 2 .
scaffold_1	Conpu1	exon	1943588	1943866	100	+	.	ID=TRINITY_DN6564_c0_g1_i1.mrna1.exon1;Name=TRINITY_DN6564_c0_g1_i1;Parent=TRINITY_DN6564_c0_g1_i1.mrna1;Target=TRINITY_DN6564_c0_g1_i1 279 1 .
scaffold_1	Conpu1	gene	1943588	1943866	.	+	.	ID=TRINITY_DN6564_c0_g1_i1.path1;Name=TRINITY_DN6564_c0_g1_i1
scaffold_1	Conpu1	mRNA	1943588	1943866	.	+	.	ID=TRINITY_DN6564_c0_g1_i1.mrna1;Name=TRINITY_DN6564_c0_g1_i1;Parent=TRINITY_DN6564_c0_g1_i1.path1;coverage=100.0;identity=100.0;matches=279;mismatches=0;indels=0;unknowns=0
scaffold_1	Conpu1	CDS	1943590	1943712	100	+	0	ID=TRINITY_DN6564_c0_g1_i1.mrna1.cds1;Name=TRINITY_DN6564_c0_g1_i1;Parent=TRINITY_DN6564_c0_g1_i1.mrna1;Target=TRINITY_DN6564_c0_g1_i1 125 3 .
scaffold_1	Conpu1	exon	1943990	1944356	100	+	.	ID=TRINITY_DN6028_c0_g1_i1.mrna1.exon1;Name=TRINITY_DN6028_c0_g1_i1;Parent=TRINITY_DN6028_c0_g1_i1.mrna1;Target=TRINITY_DN6028_c0_g1_i1 367 1 .
scaffold_1	Conpu1	gene	1943990	1944356	.	+	.	ID=TRINITY_DN6028_c0_g1_i1.path1;Name=TRINITY_DN6028_c0_g1_i1
scaffold_1	Conpu1	mRNA	1943990	1944356	.	+	.	ID=TRINITY_DN6028_c0_g1_i1.mrna1;Name=TRINITY_DN6028_c0_g1_i1;Parent=TRINITY_DN6028_c0_g1_i1.path1;coverage=100.0;identity=100.0;matches=367;mismatches=0;indels=0;unknowns=0
scaffold_1	Conpu1	CDS	1944095	1944355	100	+	0	ID=TRINITY_DN6028_c0_g1_i1.mrna1.cds1;Name=TRINITY_DN6028_c0_g1_i1;Parent=TRINITY_DN6028_c0_g1_i1.mrna1;Target=TRINITY_DN6028_c0_g1_i1 366 106 .
scaffold_1	Conpu1	exon	1986847	1987076	100	+	.	ID=TRINITY_DN9610_c0_g1_i1.mrna1.exon1;Name=TRINITY_DN9610_c0_g1_i1;Parent=TRINITY_DN9610_c0_g1_i1.mrna1;Target=TRINITY_DN9610_c0_g1_i1 230 1 .
scaffold_1	Conpu1	gene	1986847	1987076	.	+	.	ID=TRINITY_DN9610_c0_g1_i1.path1;Name=TRINITY_DN9610_c0_g1_i1
scaffold_1	Conpu1	mRNA	1986847	1987076	.	+	.	ID=TRINITY_DN9610_c0_g1_i1.mrna1;Name=TRINITY_DN9610_c0_g1_i1;Parent=TRINITY_DN9610_c0_g1_i1.path1;coverage=100.0;identity=100.0;matches=230;mismatches=0;indels=0;unknowns=0
scaffold_1	Conpu1	CDS	1986849	1986965	100	+	0	ID=TRINITY_DN9610_c0_g1_i1.mrna1.cds1;Name=TRINITY_DN9610_c0_g1_i1;Parent=TRINITY_DN9610_c0_g1_i1.mrna1;Target=TRINITY_DN9610_c0_g1_i1 119 3 .
scaffold_1	Conpu1	exon	2002917	2003166	99	+	.	ID=TRINITY_DN16411_c0_g1_i1.mrna1.exon1;Name=TRINITY_DN16411_c0_g1_i1;Parent=TRINITY_DN16411_c0_g1_i1.mrna1;Target=TRINITY_DN16411_c0_g1_i1 250 1 .
scaffold_1	Conpu1	gene	2002917	2003166	.	+	.	ID=TRINITY_DN16411_c0_g1_i1.path1;Name=TRINITY_DN16411_c0_g1_i1
scaffold_1	Conpu1	mRNA	2002917	2003166	.	+	.	ID=TRINITY_DN16411_c0_g1_i1.mrna1;Name=TRINITY_DN16411_c0_g1_i1;Parent=TRINITY_DN16411_c0_g1_i1.path1;coverage=100.0;identity=99.6;matches=249;mismatches=1;indels=0;unknowns=0
scaffold_1	Conpu1	CDS	2002918	2003106	100	+	0	ID=TRINITY_DN16411_c0_g1_i1.mrna1.cds1;Name=TRINITY_DN16411_c0_g1_i1;Parent=TRINITY_DN16411_c0_g1_i1.mrna1;Target=TRINITY_DN16411_c0_g1_i1 190 2 .
scaffold_1	Conpu1	exon	2022268	2022796	100	+	.	ID=TRINITY_DN8204_c0_g1_i1.mrna1.exon1;Name=TRINITY_DN8204_c0_g1_i1;Parent=TRINITY_DN8204_c0_g1_i1.mrna1;Target=TRINITY_DN8204_c0_g1_i1 529 1 .
scaffold_1	Conpu1	gene	2022268	2022796	.	+	.	ID=TRINITY_DN8204_c0_g1_i1.path1;Name=TRINITY_DN8204_c0_g1_i1
scaffold_1	Conpu1	mRNA	2022268	2022796	.	+	.	ID=TRINITY_DN8204_c0_g1_i1.mrna1;Name=TRINITY_DN8204_c0_g1_i1;Parent=TRINITY_DN8204_c0_g1_i1.path1;coverage=100.0;identity=100.0;matches=529;mismatches=0;indels=0;unknowns=0
scaffold_1	Conpu1	CDS	2022270	2022491	100	+	0	ID=TRINITY_DN8204_c0_g1_i1.mrna1.cds1;Name=TRINITY_DN8204_c0_g1_i1;Parent=TRINITY_DN8204_c0_g1_i1.mrna1;Target=TRINITY_DN8204_c0_g1_i1 224 3 .
scaffold_1	Conpu1	exon	2031193	2031563	100	+	.	ID=TRINITY_DN16503_c0_g1_i1.mrna1.exon1;Name=TRINITY_DN16503_c0_g1_i1;Parent=TRINITY_DN16503_c0_g1_i1.mrna1;Target=TRINITY_DN16503_c0_g1_i1 371 1 .
scaffold_1	Conpu1	gene	2031193	2031563	.	+	.	ID=TRINITY_DN16503_c0_g1_i1.path1;Name=TRINITY_DN16503_c0_g1_i1
scaffold_1	Conpu1	mRNA	2031193	2031563	.	+	.	ID=TRINITY_DN16503_c0_g1_i1.mrna1;Name=TRINITY_DN16503_c0_g1_i1;Parent=TRINITY_DN16503_c0_g1_i1.path1;coverage=100.0;identity=100.0;matches=371;mismatches=0;indels=0;unknowns=0
scaffold_1	Conpu1	CDS	2031305	2031421	100	+	0	ID=TRINITY_DN16503_c0_g1_i1.mrna1.cds1;Name=TRINITY_DN16503_c0_g1_i1;Parent=TRINITY_DN16503_c0_g1_i1.mrna1;Target=TRINITY_DN16503_c0_g1_i1 229 113 .
scaffold_1	Conpu1	CDS	2084733	2084764	100	-	1	ID=TRINITY_DN6140_c0_g1_i1.mrna1.cds2;Name=TRINITY_DN6140_c0_g1_i1;Parent=TRINITY_DN6140_c0_g1_i1.mrna1;Target=TRINITY_DN6140_c0_g1_i1 217 248 +
scaffold_1	Conpu1	exon	2084733	2084764	100	-	.	ID=TRINITY_DN6140_c0_g1_i1.mrna1.exon2;Name=TRINITY_DN6140_c0_g1_i1;Parent=TRINITY_DN6140_c0_g1_i1.mrna1;Target=TRINITY_DN6140_c0_g1_i1 217 248 +
scaffold_1	Conpu1	gene	2084733	2085043	.	-	.	ID=TRINITY_DN6140_c0_g1_i1.path1;Name=TRINITY_DN6140_c0_g1_i1
scaffold_1	Conpu1	mRNA	2084733	2085043	.	-	.	ID=TRINITY_DN6140_c0_g1_i1.mrna1;Name=TRINITY_DN6140_c0_g1_i1;Parent=TRINITY_DN6140_c0_g1_i1.path1;coverage=100.0;identity=100.0;matches=248;mismatches=0;indels=0;unknowns=0
scaffold_1	Conpu1	CDS	2084828	2084924	100	-	0	ID=TRINITY_DN6140_c0_g1_i1.mrna1.cds1;Name=TRINITY_DN6140_c0_g1_i1;Parent=TRINITY_DN6140_c0_g1_i1.mrna1;Target=TRINITY_DN6140_c0_g1_i1 120 216 +
scaffold_1	Conpu1	exon	2084828	2085043	100	-	.	ID=TRINITY_DN6140_c0_g1_i1.mrna1.exon1;Name=TRINITY_DN6140_c0_g1_i1;Parent=TRINITY_DN6140_c0_g1_i1.mrna1;Target=TRINITY_DN6140_c0_g1_i1 1 216 +
scaffold_1	Conpu1	exon	2148967	2149449	100	-	.	ID=TRINITY_DN7348_c0_g1_i1.mrna1.exon2;Name=TRINITY_DN7348_c0_g1_i1;Parent=TRINITY_DN7348_c0_g1_i1.mrna1;Target=TRINITY_DN7348_c0_g1_i1 1 483 -
scaffold_1	Conpu1	gene	2148967	2150022	.	-	.	ID=TRINITY_DN7348_c0_g1_i1.path1;Name=TRINITY_DN7348_c0_g1_i1
scaffold_1	Conpu1	mRNA	2148967	2150022	.	-	.	ID=TRINITY_DN7348_c0_g1_i1.mrna1;Name=TRINITY_DN7348_c0_g1_i1;Parent=TRINITY_DN7348_c0_g1_i1.path1;coverage=100.0;identity=100.0;matches=999;mismatches=0;indels=0;unknowns=0
scaffold_1	Conpu1	CDS	2149428	2149449	100	-	2	ID=TRINITY_DN7348_c0_g1_i1.mrna1.cds2;Name=TRINITY_DN7348_c0_g1_i1;Parent=TRINITY_DN7348_c0_g1_i1.mrna1;Target=TRINITY_DN7348_c0_g1_i1 462 483 .
scaffold_1	Conpu1	CDS	2149507	2149730	100	-	0	ID=TRINITY_DN7348_c0_g1_i1.mrna1.cds1;Name=TRINITY_DN7348_c0_g1_i1;Parent=TRINITY_DN7348_c0_g1_i1.mrna1;Target=TRINITY_DN7348_c0_g1_i1 484 707 .
scaffold_1	Conpu1	exon	2149507	2150022	100	-	.	ID=TRINITY_DN7348_c0_g1_i1.mrna1.exon1;Name=TRINITY_DN7348_c0_g1_i1;Parent=TRINITY_DN7348_c0_g1_i1.mrna1;Target=TRINITY_DN7348_c0_g1_i1 484 999 -
scaffold_1	Conpu1	CDS	2217106	2217201	100	+	0	ID=TRINITY_DN15806_c0_g1_i1.mrna1.cds1;Name=TRINITY_DN15806_c0_g1_i1;Parent=TRINITY_DN15806_c0_g1_i1.mrna1;Target=TRINITY_DN15806_c0_g1_i1 96 1 .
scaffold_1	Conpu1	exon	2217106	2217381	100	+	.	ID=TRINITY_DN15806_c0_g1_i1.mrna1.exon1;Name=TRINITY_DN15806_c0_g1_i1;Parent=TRINITY_DN15806_c0_g1_i1.mrna1;Target=TRINITY_DN15806_c0_g1_i1 276 1 .
scaffold_1	Conpu1	gene	2217106	2217381	.	+	.	ID=TRINITY_DN15806_c0_g1_i1.path1;Name=TRINITY_DN15806_c0_g1_i1
scaffold_1	Conpu1	mRNA	2217106	2217381	.	+	.	ID=TRINITY_DN15806_c0_g1_i1.mrna1;Name=TRINITY_DN15806_c0_g1_i1;Parent=TRINITY_DN15806_c0_g1_i1.path1;coverage=100.0;identity=100.0;matches=276;mismatches=0;indels=0;unknowns=0
scaffold_1	Conpu1	exon	2223639	2223892	100	-	.	ID=TRINITY_DN15400_c0_g1_i1.mrna1.exon1;Name=TRINITY_DN15400_c0_g1_i1;Parent=TRINITY_DN15400_c0_g1_i1.mrna1;Target=TRINITY_DN15400_c0_g1_i1 254 1 .
scaffold_1	Conpu1	gene	2223639	2223892	.	-	.	ID=TRINITY_DN15400_c0_g1_i1.path1;Name=TRINITY_DN15400_c0_g1_i1
scaffold_1	Conpu1	mRNA	2223639	2223892	.	-	.	ID=TRINITY_DN15400_c0_g1_i1.mrna1;Name=TRINITY_DN15400_c0_g1_i1;Parent=TRINITY_DN15400_c0_g1_i1.path1;coverage=100.0;identity=100.0;matches=254;mismatches=0;indels=0;unknowns=0
scaffold_1	Conpu1	CDS	2223666	2223890	100	-	0	ID=TRINITY_DN15400_c0_g1_i1.mrna1.cds1;Name=TRINITY_DN15400_c0_g1_i1;Parent=TRINITY_DN15400_c0_g1_i1.mrna1;Target=TRINITY_DN15400_c0_g1_i1 227 3 .
scaffold_1	Conpu1	exon	2232111	2232397	100	+	.	ID=TRINITY_DN7242_c0_g1_i1.mrna1.exon1;Name=TRINITY_DN7242_c0_g1_i1;Parent=TRINITY_DN7242_c0_g1_i1.mrna1;Target=TRINITY_DN7242_c0_g1_i1 307 21 .
scaffold_1	Conpu1	gene	2232111	2232397	.	+	.	ID=TRINITY_DN7242_c0_g1_i1.path1;Name=TRINITY_DN7242_c0_g1_i1
scaffold_1	Conpu1	mRNA	2232111	2232397	.	+	.	ID=TRINITY_DN7242_c0_g1_i1.mrna1;Name=TRINITY_DN7242_c0_g1_i1;Parent=TRINITY_DN7242_c0_g1_i1.path1;coverage=93.5;identity=100.0;matches=287;mismatches=0;indels=0;unknowns=0
scaffold_1	Conpu1	CDS	2232112	2232270	100	+	0	ID=TRINITY_DN7242_c0_g1_i1.mrna1.cds1;Name=TRINITY_DN7242_c0_g1_i1;Parent=TRINITY_DN7242_c0_g1_i1.mrna1;Target=TRINITY_DN7242_c0_g1_i1 180 22 .
scaffold_1	Conpu1	exon	2284202	2284512	100	+	.	ID=TRINITY_DN3911_c0_g1_i1.mrna1.exon1;Name=TRINITY_DN3911_c0_g1_i1;Parent=TRINITY_DN3911_c0_g1_i1.mrna1;Target=TRINITY_DN3911_c0_g1_i1 311 1 .
scaffold_1	Conpu1	gene	2284202	2284512	.	+	.	ID=TRINITY_DN3911_c0_g1_i1.path1;Name=TRINITY_DN3911_c0_g1_i1
scaffold_1	Conpu1	mRNA	2284202	2284512	.	+	.	ID=TRINITY_DN3911_c0_g1_i1.mrna1;Name=TRINITY_DN3911_c0_g1_i1;Parent=TRINITY_DN3911_c0_g1_i1.path1;coverage=100.0;identity=100.0;matches=311;mismatches=0;indels=0;unknowns=0
scaffold_1	Conpu1	CDS	2284333	2284512	100	+	0	ID=TRINITY_DN3911_c0_g1_i1.mrna1.cds1;Name=TRINITY_DN3911_c0_g1_i1;Parent=TRINITY_DN3911_c0_g1_i1.mrna1;Target=TRINITY_DN3911_c0_g1_i1 311 132 .
scaffold_1	Conpu1	exon	2284663	2284928	100	-	.	ID=TRINITY_DN8147_c0_g1_i1.mrna1.exon2;Name=TRINITY_DN8147_c0_g1_i1;Parent=TRINITY_DN8147_c0_g1_i1.mrna1;Target=TRINITY_DN8147_c0_g1_i1 8 273 -
scaffold_1	Conpu1	gene	2284663	2285006	.	-	.	ID=TRINITY_DN8147_c0_g1_i1.path1;Name=TRINITY_DN8147_c0_g1_i1
scaffold_1	Conpu1	mRNA	2284663	2285006	.	-	.	ID=TRINITY_DN8147_c0_g1_i1.mrna1;Name=TRINITY_DN8147_c0_g1_i1;Parent=TRINITY_DN8147_c0_g1_i1.path1;coverage=97.6;identity=100.0;matches=286;mismatches=0;indels=0;unknowns=0
scaffold_1	Conpu1	CDS	2284729	2284887	100	-	0	ID=TRINITY_DN8147_c0_g1_i1.mrna1.cds1;Name=TRINITY_DN8147_c0_g1_i1;Parent=TRINITY_DN8147_c0_g1_i1.mrna1;Target=TRINITY_DN8147_c0_g1_i1 74 232 .
scaffold_1	Conpu1	exon	2284987	2285006	100	-	.	ID=TRINITY_DN8147_c0_g1_i1.mrna1.exon1;Name=TRINITY_DN8147_c0_g1_i1;Parent=TRINITY_DN8147_c0_g1_i1.mrna1;Target=TRINITY_DN8147_c0_g1_i1 274 293 -
scaffold_1	Conpu1	exon	2292830	2293101	100	-	.	ID=TRINITY_DN13318_c0_g1_i1.mrna1.exon1;Name=TRINITY_DN13318_c0_g1_i1;Parent=TRINITY_DN13318_c0_g1_i1.mrna1;Target=TRINITY_DN13318_c0_g1_i1 272 1 .
scaffold_1	Conpu1	gene	2292830	2293101	.	-	.	ID=TRINITY_DN13318_c0_g1_i1.path1;Name=TRINITY_DN13318_c0_g1_i1
scaffold_1	Conpu1	mRNA	2292830	2293101	.	-	.	ID=TRINITY_DN13318_c0_g1_i1.mrna1;Name=TRINITY_DN13318_c0_g1_i1;Parent=TRINITY_DN13318_c0_g1_i1.path1;coverage=100.0;identity=100.0;matches=272;mismatches=0;indels=0;unknowns=0
scaffold_1	Conpu1	CDS	2292936	2293085	100	-	0	ID=TRINITY_DN13318_c0_g1_i1.mrna1.cds1;Name=TRINITY_DN13318_c0_g1_i1;Parent=TRINITY_DN13318_c0_g1_i1.mrna1;Target=TRINITY_DN13318_c0_g1_i1 166 17 .
scaffold_1	Conpu1	exon	2306985	2307203	100	+	.	ID=TRINITY_DN5292_c0_g1_i1.mrna1.exon1;Name=TRINITY_DN5292_c0_g1_i1;Parent=TRINITY_DN5292_c0_g1_i1.mrna1;Target=TRINITY_DN5292_c0_g1_i1 219 1 .
scaffold_1	Conpu1	gene	2306985	2307203	.	+	.	ID=TRINITY_DN5292_c0_g1_i1.path1;Name=TRINITY_DN5292_c0_g1_i1
scaffold_1	Conpu1	mRNA	2306985	2307203	.	+	.	ID=TRINITY_DN5292_c0_g1_i1.mrna1;Name=TRINITY_DN5292_c0_g1_i1;Parent=TRINITY_DN5292_c0_g1_i1.path1;coverage=100.0;identity=100.0;matches=219;mismatches=0;indels=0;unknowns=0
scaffold_1	Conpu1	CDS	2306986	2307138	100	+	0	ID=TRINITY_DN5292_c0_g1_i1.mrna1.cds1;Name=TRINITY_DN5292_c0_g1_i1;Parent=TRINITY_DN5292_c0_g1_i1.mrna1;Target=TRINITY_DN5292_c0_g1_i1 154 2 .
scaffold_1	Conpu1	exon	2364413	2364800	99	+	.	ID=TRINITY_DN15235_c0_g1_i1.mrna1.exon1;Name=TRINITY_DN15235_c0_g1_i1;Parent=TRINITY_DN15235_c0_g1_i1.mrna1;Target=TRINITY_DN15235_c0_g1_i1 387 1 .
scaffold_1	Conpu1	gene	2364413	2364800	.	+	.	ID=TRINITY_DN15235_c0_g1_i1.path1;Name=TRINITY_DN15235_c0_g1_i1
scaffold_1	Conpu1	mRNA	2364413	2364800	.	+	.	ID=TRINITY_DN15235_c0_g1_i1.mrna1;Name=TRINITY_DN15235_c0_g1_i1;Parent=TRINITY_DN15235_c0_g1_i1.path1;coverage=95.6;identity=99.7;matches=387;mismatches=0;indels=1;unknowns=0
scaffold_1	Conpu1	CDS	2364414	2364471	98	+	0	ID=TRINITY_DN15235_c0_g1_i1.mrna1.cds1;Name=TRINITY_DN15235_c0_g1_i1;Parent=TRINITY_DN15235_c0_g1_i1.mrna1;Target=TRINITY_DN15235_c0_g1_i1 58 2 .
scaffold_1	Conpu1	exon	2418128	2418337	100	-	.	ID=TRINITY_DN15846_c0_g1_i1.mrna1.exon1;Name=TRINITY_DN15846_c0_g1_i1;Parent=TRINITY_DN15846_c0_g1_i1.mrna1;Target=TRINITY_DN15846_c0_g1_i1 210 1 .
scaffold_1	Conpu1	gene	2418128	2418337	.	-	.	ID=TRINITY_DN15846_c0_g1_i1.path1;Name=TRINITY_DN15846_c0_g1_i1
scaffold_1	Conpu1	mRNA	2418128	2418337	.	-	.	ID=TRINITY_DN15846_c0_g1_i1.mrna1;Name=TRINITY_DN15846_c0_g1_i1;Parent=TRINITY_DN15846_c0_g1_i1.path1;coverage=100.0;identity=100.0;matches=210;mismatches=0;indels=0;unknowns=0
scaffold_1	Conpu1	CDS	2418269	2418337	100	-	0	ID=TRINITY_DN15846_c0_g1_i1.mrna1.cds1;Name=TRINITY_DN15846_c0_g1_i1;Parent=TRINITY_DN15846_c0_g1_i1.mrna1;Target=TRINITY_DN15846_c0_g1_i1 69 1 .
scaffold_1	Conpu1	CDS	2565917	2566147	100	+	0	ID=TRINITY_DN11672_c0_g1_i1.mrna1.cds1;Name=TRINITY_DN11672_c0_g1_i1;Parent=TRINITY_DN11672_c0_g1_i1.mrna1;Target=TRINITY_DN11672_c0_g1_i1 231 1 .
scaffold_1	Conpu1	exon	2565917	2566149	100	+	.	ID=TRINITY_DN11672_c0_g1_i1.mrna1.exon1;Name=TRINITY_DN11672_c0_g1_i1;Parent=TRINITY_DN11672_c0_g1_i1.mrna1;Target=TRINITY_DN11672_c0_g1_i1 233 1 .
scaffold_1	Conpu1	gene	2565917	2566149	.	+	.	ID=TRINITY_DN11672_c0_g1_i1.path1;Name=TRINITY_DN11672_c0_g1_i1
scaffold_1	Conpu1	mRNA	2565917	2566149	.	+	.	ID=TRINITY_DN11672_c0_g1_i1.mrna1;Name=TRINITY_DN11672_c0_g1_i1;Parent=TRINITY_DN11672_c0_g1_i1.path1;coverage=100.0;identity=100.0;matches=233;mismatches=0;indels=0;unknowns=0
scaffold_1	Conpu1	exon	2578216	2578453	100	+	.	ID=TRINITY_DN13198_c0_g1_i1.mrna1.exon1;Name=TRINITY_DN13198_c0_g1_i1;Parent=TRINITY_DN13198_c0_g1_i1.mrna1;Target=TRINITY_DN13198_c0_g1_i1 242 5 .
scaffold_1	Conpu1	gene	2578216	2578453	.	+	.	ID=TRINITY_DN13198_c0_g1_i1.path1;Name=TRINITY_DN13198_c0_g1_i1
scaffold_1	Conpu1	mRNA	2578216	2578453	.	+	.	ID=TRINITY_DN13198_c0_g1_i1.mrna1;Name=TRINITY_DN13198_c0_g1_i1;Parent=TRINITY_DN13198_c0_g1_i1.path1;coverage=98.3;identity=100.0;matches=238;mismatches=0;indels=0;unknowns=0
scaffold_1	Conpu1	CDS	2578217	2578378	100	+	0	ID=TRINITY_DN13198_c0_g1_i1.mrna1.cds1;Name=TRINITY_DN13198_c0_g1_i1;Parent=TRINITY_DN13198_c0_g1_i1.mrna1;Target=TRINITY_DN13198_c0_g1_i1 167 6 .
scaffold_1	Conpu1	exon	2578946	2579156	100	-	.	ID=TRINITY_DN4108_c0_g1_i1.mrna1.exon1;Name=TRINITY_DN4108_c0_g1_i1;Parent=TRINITY_DN4108_c0_g1_i1.mrna1;Target=TRINITY_DN4108_c0_g1_i1 211 1 .
scaffold_1	Conpu1	gene	2578946	2579156	.	-	.	ID=TRINITY_DN4108_c0_g1_i1.path1;Name=TRINITY_DN4108_c0_g1_i1
scaffold_1	Conpu1	mRNA	2578946	2579156	.	-	.	ID=TRINITY_DN4108_c0_g1_i1.mrna1;Name=TRINITY_DN4108_c0_g1_i1;Parent=TRINITY_DN4108_c0_g1_i1.path1;coverage=100.0;identity=100.0;matches=211;mismatches=0;indels=0;unknowns=0
scaffold_1	Conpu1	CDS	2578948	2579154	100	-	0	ID=TRINITY_DN4108_c0_g1_i1.mrna1.cds1;Name=TRINITY_DN4108_c0_g1_i1;Parent=TRINITY_DN4108_c0_g1_i1.mrna1;Target=TRINITY_DN4108_c0_g1_i1 209 3 .
scaffold_1	Conpu1	exon	2579268	2579611	99	-	.	ID=TRINITY_DN6017_c0_g1_i1.mrna1.exon1;Name=TRINITY_DN6017_c0_g1_i1;Parent=TRINITY_DN6017_c0_g1_i1.mrna1;Target=TRINITY_DN6017_c0_g1_i1 344 1 .
scaffold_1	Conpu1	gene	2579268	2579611	.	-	.	ID=TRINITY_DN6017_c0_g1_i1.path1;Name=TRINITY_DN6017_c0_g1_i1
scaffold_1	Conpu1	mRNA	2579268	2579611	.	-	.	ID=TRINITY_DN6017_c0_g1_i1.mrna1;Name=TRINITY_DN6017_c0_g1_i1;Parent=TRINITY_DN6017_c0_g1_i1.path1;coverage=98.9;identity=99.7;matches=343;mismatches=1;indels=0;unknowns=0
scaffold_1	Conpu1	CDS	2579478	2579609	100	-	0	ID=TRINITY_DN6017_c0_g1_i1.mrna1.cds1;Name=TRINITY_DN6017_c0_g1_i1;Parent=TRINITY_DN6017_c0_g1_i1.mrna1;Target=TRINITY_DN6017_c0_g1_i1 134 3 .
scaffold_1	Conpu1	exon	2597241	2597473	100	+	.	ID=TRINITY_DN13191_c0_g1_i1.mrna1.exon1;Name=TRINITY_DN13191_c0_g1_i1;Parent=TRINITY_DN13191_c0_g1_i1.mrna1;Target=TRINITY_DN13191_c0_g1_i1 1 233 +
scaffold_1	Conpu1	gene	2597241	2597973	.	+	.	ID=TRINITY_DN13191_c0_g1_i1.path1;Name=TRINITY_DN13191_c0_g1_i1
scaffold_1	Conpu1	mRNA	2597241	2597973	.	+	.	ID=TRINITY_DN13191_c0_g1_i1.mrna1;Name=TRINITY_DN13191_c0_g1_i1;Parent=TRINITY_DN13191_c0_g1_i1.path1;coverage=100.0;identity=100.0;matches=601;mismatches=0;indels=0;unknowns=0
scaffold_1	Conpu1	CDS	2597242	2597472	100	+	0	ID=TRINITY_DN13191_c0_g1_i1.mrna1.cds1;Name=TRINITY_DN13191_c0_g1_i1;Parent=TRINITY_DN13191_c0_g1_i1.mrna1;Target=TRINITY_DN13191_c0_g1_i1 2 232 +
scaffold_1	Conpu1	exon	2597539	2597699	100	+	.	ID=TRINITY_DN13191_c0_g1_i1.mrna1.exon2;Name=TRINITY_DN13191_c0_g1_i1;Parent=TRINITY_DN13191_c0_g1_i1.mrna1;Target=TRINITY_DN13191_c0_g1_i1 234 394 +
scaffold_1	Conpu1	exon	2597767	2597973	100	+	.	ID=TRINITY_DN13191_c0_g1_i1.mrna1.exon3;Name=TRINITY_DN13191_c0_g1_i1;Parent=TRINITY_DN13191_c0_g1_i1.mrna1;Target=TRINITY_DN13191_c0_g1_i1 395 601 +
scaffold_1	Conpu1	exon	2599694	2599897	100	+	.	ID=TRINITY_DN12551_c0_g1_i1.mrna1.exon1;Name=TRINITY_DN12551_c0_g1_i1;Parent=TRINITY_DN12551_c0_g1_i1.mrna1;Target=TRINITY_DN12551_c0_g1_i1 204 1 .
scaffold_1	Conpu1	gene	2599694	2599897	.	+	.	ID=TRINITY_DN12551_c0_g1_i1.path1;Name=TRINITY_DN12551_c0_g1_i1
scaffold_1	Conpu1	mRNA	2599694	2599897	.	+	.	ID=TRINITY_DN12551_c0_g1_i1.mrna1;Name=TRINITY_DN12551_c0_g1_i1;Parent=TRINITY_DN12551_c0_g1_i1.path1;coverage=100.0;identity=100.0;matches=204;mismatches=0;indels=0;unknowns=0
scaffold_1	Conpu1	CDS	2599695	2599847	100	+	0	ID=TRINITY_DN12551_c0_g1_i1.mrna1.cds1;Name=TRINITY_DN12551_c0_g1_i1;Parent=TRINITY_DN12551_c0_g1_i1.mrna1;Target=TRINITY_DN12551_c0_g1_i1 154 2 .
scaffold_1	Conpu1	exon	2603799	2603813	100	+	.	ID=TRINITY_DN9768_c0_g1_i1.mrna1.exon1;Name=TRINITY_DN9768_c0_g1_i1;Parent=TRINITY_DN9768_c0_g1_i1.mrna1;Target=TRINITY_DN9768_c0_g1_i1 1 15 +
scaffold_1	Conpu1	gene	2603799	2604203	.	+	.	ID=TRINITY_DN9768_c0_g1_i1.path1;Name=TRINITY_DN9768_c0_g1_i1
scaffold_1	Conpu1	mRNA	2603799	2604203	.	+	.	ID=TRINITY_DN9768_c0_g1_i1.mrna1;Name=TRINITY_DN9768_c0_g1_i1;Parent=TRINITY_DN9768_c0_g1_i1.path1;coverage=100.0;identity=100.0;matches=230;mismatches=0;indels=0;unknowns=0
scaffold_1	Conpu1	exon	2603989	2604203	100	+	.	ID=TRINITY_DN9768_c0_g1_i1.mrna1.exon2;Name=TRINITY_DN9768_c0_g1_i1;Parent=TRINITY_DN9768_c0_g1_i1.mrna1;Target=TRINITY_DN9768_c0_g1_i1 16 230 +
scaffold_1	Conpu1	CDS	2604044	2604154	100	+	0	ID=TRINITY_DN9768_c0_g1_i1.mrna1.cds1;Name=TRINITY_DN9768_c0_g1_i1;Parent=TRINITY_DN9768_c0_g1_i1.mrna1;Target=TRINITY_DN9768_c0_g1_i1 71 181 +
scaffold_1	Conpu1	CDS	2621701	2621790	100	+	0	ID=TRINITY_DN6435_c0_g1_i1.mrna1.cds1;Name=TRINITY_DN6435_c0_g1_i1;Parent=TRINITY_DN6435_c0_g1_i1.mrna1;Target=TRINITY_DN6435_c0_g1_i1 90 1 .
scaffold_1	Conpu1	exon	2621701	2621916	100	+	.	ID=TRINITY_DN6435_c0_g1_i1.mrna1.exon1;Name=TRINITY_DN6435_c0_g1_i1;Parent=TRINITY_DN6435_c0_g1_i1.mrna1;Target=TRINITY_DN6435_c0_g1_i1 216 1 .
scaffold_1	Conpu1	gene	2621701	2621916	.	+	.	ID=TRINITY_DN6435_c0_g1_i1.path1;Name=TRINITY_DN6435_c0_g1_i1
scaffold_1	Conpu1	mRNA	2621701	2621916	.	+	.	ID=TRINITY_DN6435_c0_g1_i1.mrna1;Name=TRINITY_DN6435_c0_g1_i1;Parent=TRINITY_DN6435_c0_g1_i1.path1;coverage=100.0;identity=100.0;matches=216;mismatches=0;indels=0;unknowns=0
scaffold_1	Conpu1	exon	2622052	2622301	100	-	.	ID=TRINITY_DN10520_c0_g1_i1.mrna1.exon1;Name=TRINITY_DN10520_c0_g1_i1;Parent=TRINITY_DN10520_c0_g1_i1.mrna1;Target=TRINITY_DN10520_c0_g1_i1 250 1 .
scaffold_1	Conpu1	gene	2622052	2622301	.	-	.	ID=TRINITY_DN10520_c0_g1_i1.path1;Name=TRINITY_DN10520_c0_g1_i1
scaffold_1	Conpu1	mRNA	2622052	2622301	.	-	.	ID=TRINITY_DN10520_c0_g1_i1.mrna1;Name=TRINITY_DN10520_c0_g1_i1;Parent=TRINITY_DN10520_c0_g1_i1.path1;coverage=100.0;identity=100.0;matches=250;mismatches=0;indels=0;unknowns=0
scaffold_1	Conpu1	CDS	2622160	2622300	100	-	0	ID=TRINITY_DN10520_c0_g1_i1.mrna1.cds1;Name=TRINITY_DN10520_c0_g1_i1;Parent=TRINITY_DN10520_c0_g1_i1.mrna1;Target=TRINITY_DN10520_c0_g1_i1 142 2 .
scaffold_1	Conpu1	exon	2669458	2669737	100	+	.	ID=TRINITY_DN13040_c0_g1_i1.mrna1.exon1;Name=TRINITY_DN13040_c0_g1_i1;Parent=TRINITY_DN13040_c0_g1_i1.mrna1;Target=TRINITY_DN13040_c0_g1_i1 280 1 .
scaffold_1	Conpu1	gene	2669458	2669737	.	+	.	ID=TRINITY_DN13040_c0_g1_i1.path1;Name=TRINITY_DN13040_c0_g1_i1
scaffold_1	Conpu1	mRNA	2669458	2669737	.	+	.	ID=TRINITY_DN13040_c0_g1_i1.mrna1;Name=TRINITY_DN13040_c0_g1_i1;Parent=TRINITY_DN13040_c0_g1_i1.path1;coverage=100.0;identity=100.0;matches=280;mismatches=0;indels=0;unknowns=0
scaffold_1	Conpu1	CDS	2669529	2669678	100	+	0	ID=TRINITY_DN13040_c0_g1_i1.mrna1.cds1;Name=TRINITY_DN13040_c0_g1_i1;Parent=TRINITY_DN13040_c0_g1_i1.mrna1;Target=TRINITY_DN13040_c0_g1_i1 221 72 .
scaffold_1	Conpu1	exon	2747719	2748205	100	-	.	ID=TRINITY_DN13083_c0_g1_i1.mrna1.exon1;Name=TRINITY_DN13083_c0_g1_i1;Parent=TRINITY_DN13083_c0_g1_i1.mrna1;Target=TRINITY_DN13083_c0_g1_i1 487 1 .
scaffold_1	Conpu1	gene	2747719	2748205	.	-	.	ID=TRINITY_DN13083_c0_g1_i1.path1;Name=TRINITY_DN13083_c0_g1_i1
scaffold_1	Conpu1	mRNA	2747719	2748205	.	-	.	ID=TRINITY_DN13083_c0_g1_i1.mrna1;Name=TRINITY_DN13083_c0_g1_i1;Parent=TRINITY_DN13083_c0_g1_i1.path1;coverage=100.0;identity=100.0;matches=487;mismatches=0;indels=0;unknowns=0
scaffold_1	Conpu1	CDS	2748050	2748205	100	-	0	ID=TRINITY_DN13083_c0_g1_i1.mrna1.cds1;Name=TRINITY_DN13083_c0_g1_i1;Parent=TRINITY_DN13083_c0_g1_i1.mrna1;Target=TRINITY_DN13083_c0_g1_i1 156 1 .
scaffold_1	Conpu1	exon	2804542	2804585	100	+	.	ID=TRINITY_DN12189_c0_g1_i1.mrna1.exon1;Name=TRINITY_DN12189_c0_g1_i1;Parent=TRINITY_DN12189_c0_g1_i1.mrna1;Target=TRINITY_DN12189_c0_g1_i1 1 44 +
scaffold_1	Conpu1	gene	2804542	2805110	.	+	.	ID=TRINITY_DN12189_c0_g1_i1.path1;Name=TRINITY_DN12189_c0_g1_i1
scaffold_1	Conpu1	mRNA	2804542	2805110	.	+	.	ID=TRINITY_DN12189_c0_g1_i1.mrna1;Name=TRINITY_DN12189_c0_g1_i1;Parent=TRINITY_DN12189_c0_g1_i1.path1;coverage=100.0;identity=100.0;matches=454;mismatches=0;indels=0;unknowns=0
scaffold_1	Conpu1	exon	2804649	2805023	100	+	.	ID=TRINITY_DN12189_c0_g1_i1.mrna1.exon2;Name=TRINITY_DN12189_c0_g1_i1;Parent=TRINITY_DN12189_c0_g1_i1.mrna1;Target=TRINITY_DN12189_c0_g1_i1 45 419 +
scaffold_1	Conpu1	CDS	2804651	2804878	100	+	0	ID=TRINITY_DN12189_c0_g1_i1.mrna1.cds1;Name=TRINITY_DN12189_c0_g1_i1;Parent=TRINITY_DN12189_c0_g1_i1.mrna1;Target=TRINITY_DN12189_c0_g1_i1 47 274 +
scaffold_1	Conpu1	exon	2805076	2805110	100	+	.	ID=TRINITY_DN12189_c0_g1_i1.mrna1.exon3;Name=TRINITY_DN12189_c0_g1_i1;Parent=TRINITY_DN12189_c0_g1_i1.mrna1;Target=TRINITY_DN12189_c0_g1_i1 420 454 +
scaffold_1	Conpu1	exon	2870169	2870432	100	-	.	ID=TRINITY_DN16157_c0_g1_i1.mrna1.exon1;Name=TRINITY_DN16157_c0_g1_i1;Parent=TRINITY_DN16157_c0_g1_i1.mrna1;Target=TRINITY_DN16157_c0_g1_i1 264 1 .
scaffold_1	Conpu1	gene	2870169	2870432	.	-	.	ID=TRINITY_DN16157_c0_g1_i1.path1;Name=TRINITY_DN16157_c0_g1_i1
scaffold_1	Conpu1	mRNA	2870169	2870432	.	-	.	ID=TRINITY_DN16157_c0_g1_i1.mrna1;Name=TRINITY_DN16157_c0_g1_i1;Parent=TRINITY_DN16157_c0_g1_i1.path1;coverage=100.0;identity=100.0;matches=264;mismatches=0;indels=0;unknowns=0
scaffold_1	Conpu1	CDS	2870213	2870269	100	-	0	ID=TRINITY_DN16157_c0_g1_i1.mrna1.cds1;Name=TRINITY_DN16157_c0_g1_i1;Parent=TRINITY_DN16157_c0_g1_i1.mrna1;Target=TRINITY_DN16157_c0_g1_i1 220 164 .
scaffold_1	Conpu1	exon	2878922	2879160	100	-	.	ID=TRINITY_DN12992_c0_g1_i1.mrna1.exon1;Name=TRINITY_DN12992_c0_g1_i1;Parent=TRINITY_DN12992_c0_g1_i1.mrna1;Target=TRINITY_DN12992_c0_g1_i1 239 1 .
scaffold_1	Conpu1	gene	2878922	2879160	.	-	.	ID=TRINITY_DN12992_c0_g1_i1.path1;Name=TRINITY_DN12992_c0_g1_i1
scaffold_1	Conpu1	mRNA	2878922	2879160	.	-	.	ID=TRINITY_DN12992_c0_g1_i1.mrna1;Name=TRINITY_DN12992_c0_g1_i1;Parent=TRINITY_DN12992_c0_g1_i1.path1;coverage=100.0;identity=100.0;matches=239;mismatches=0;indels=0;unknowns=0
scaffold_1	Conpu1	CDS	2879094	2879159	100	-	0	ID=TRINITY_DN12992_c0_g1_i1.mrna1.cds1;Name=TRINITY_DN12992_c0_g1_i1;Parent=TRINITY_DN12992_c0_g1_i1.mrna1;Target=TRINITY_DN12992_c0_g1_i1 67 2 .
scaffold_1	Conpu1	exon	2881262	2881466	100	+	.	ID=TRINITY_DN9602_c0_g1_i1.mrna1.exon1;Name=TRINITY_DN9602_c0_g1_i1;Parent=TRINITY_DN9602_c0_g1_i1.mrna1;Target=TRINITY_DN9602_c0_g1_i1 205 1 .
scaffold_1	Conpu1	gene	2881262	2881466	.	+	.	ID=TRINITY_DN9602_c0_g1_i1.path1;Name=TRINITY_DN9602_c0_g1_i1
scaffold_1	Conpu1	mRNA	2881262	2881466	.	+	.	ID=TRINITY_DN9602_c0_g1_i1.mrna1;Name=TRINITY_DN9602_c0_g1_i1;Parent=TRINITY_DN9602_c0_g1_i1.path1;coverage=99.0;identity=100.0;matches=205;mismatches=0;indels=0;unknowns=0
scaffold_1	Conpu1	CDS	2881264	2881383	100	+	0	ID=TRINITY_DN9602_c0_g1_i1.mrna1.cds1;Name=TRINITY_DN9602_c0_g1_i1;Parent=TRINITY_DN9602_c0_g1_i1.mrna1;Target=TRINITY_DN9602_c0_g1_i1 122 3 .
scaffold_1	Conpu1	CDS	2915398	2915559	100	+	0	ID=TRINITY_DN16186_c0_g1_i1.mrna1.cds1;Name=TRINITY_DN16186_c0_g1_i1;Parent=TRINITY_DN16186_c0_g1_i1.mrna1;Target=TRINITY_DN16186_c0_g1_i1 162 1 .
scaffold_1	Conpu1	exon	2915398	2915625	100	+	.	ID=TRINITY_DN16186_c0_g1_i1.mrna1.exon1;Name=TRINITY_DN16186_c0_g1_i1;Parent=TRINITY_DN16186_c0_g1_i1.mrna1;Target=TRINITY_DN16186_c0_g1_i1 228 1 .
scaffold_1	Conpu1	gene	2915398	2915625	.	+	.	ID=TRINITY_DN16186_c0_g1_i1.path1;Name=TRINITY_DN16186_c0_g1_i1
scaffold_1	Conpu1	mRNA	2915398	2915625	.	+	.	ID=TRINITY_DN16186_c0_g1_i1.mrna1;Name=TRINITY_DN16186_c0_g1_i1;Parent=TRINITY_DN16186_c0_g1_i1.path1;coverage=100.0;identity=100.0;matches=228;mismatches=0;indels=0;unknowns=0
scaffold_1	Conpu1	exon	2926260	2926789	100	-	.	ID=TRINITY_DN13008_c0_g1_i1.mrna1.exon1;Name=TRINITY_DN13008_c0_g1_i1;Parent=TRINITY_DN13008_c0_g1_i1.mrna1;Target=TRINITY_DN13008_c0_g1_i1 530 1 .
scaffold_1	Conpu1	gene	2926260	2926789	.	-	.	ID=TRINITY_DN13008_c0_g1_i1.path1;Name=TRINITY_DN13008_c0_g1_i1
scaffold_1	Conpu1	mRNA	2926260	2926789	.	-	.	ID=TRINITY_DN13008_c0_g1_i1.mrna1;Name=TRINITY_DN13008_c0_g1_i1;Parent=TRINITY_DN13008_c0_g1_i1.path1;coverage=100.0;identity=100.0;matches=530;mismatches=0;indels=0;unknowns=0
scaffold_1	Conpu1	CDS	2926270	2926464	100	-	0	ID=TRINITY_DN13008_c0_g1_i1.mrna1.cds1;Name=TRINITY_DN13008_c0_g1_i1;Parent=TRINITY_DN13008_c0_g1_i1.mrna1;Target=TRINITY_DN13008_c0_g1_i1 520 326 .
scaffold_1	Conpu1	exon	3095942	3096081	100	-	.	ID=TRINITY_DN4557_c0_g1_i2.mrna1.exon2;Name=TRINITY_DN4557_c0_g1_i2;Parent=TRINITY_DN4557_c0_g1_i2.mrna1;Target=TRINITY_DN4557_c0_g1_i2 489 628 +
scaffold_1	Conpu1	gene	3095942	3096679	.	-	.	ID=TRINITY_DN4557_c0_g1_i2.path1;Name=TRINITY_DN4557_c0_g1_i2
scaffold_1	Conpu1	mRNA	3095942	3096679	.	-	.	ID=TRINITY_DN4557_c0_g1_i2.mrna1;Name=TRINITY_DN4557_c0_g1_i2;Parent=TRINITY_DN4557_c0_g1_i2.path1;coverage=100.0;identity=100.0;matches=628;mismatches=0;indels=0;unknowns=0
scaffold_1	Conpu1	exon	3096192	3096679	100	-	.	ID=TRINITY_DN4557_c0_g1_i2.mrna1.exon1;Name=TRINITY_DN4557_c0_g1_i2;Parent=TRINITY_DN4557_c0_g1_i2.mrna1;Target=TRINITY_DN4557_c0_g1_i2 1 488 +
scaffold_1	Conpu1	CDS	3096250	3096426	100	-	0	ID=TRINITY_DN4557_c0_g1_i2.mrna1.cds1;Name=TRINITY_DN4557_c0_g1_i2;Parent=TRINITY_DN4557_c0_g1_i2.mrna1;Target=TRINITY_DN4557_c0_g1_i2 254 430 +
scaffold_1	Conpu1	exon	3096819	3097144	100	-	.	ID=TRINITY_DN12145_c0_g1_i1.mrna1.exon1;Name=TRINITY_DN12145_c0_g1_i1;Parent=TRINITY_DN12145_c0_g1_i1.mrna1;Target=TRINITY_DN12145_c0_g1_i1 326 1 .
scaffold_1	Conpu1	gene	3096819	3097144	.	-	.	ID=TRINITY_DN12145_c0_g1_i1.path1;Name=TRINITY_DN12145_c0_g1_i1
scaffold_1	Conpu1	mRNA	3096819	3097144	.	-	.	ID=TRINITY_DN12145_c0_g1_i1.mrna1;Name=TRINITY_DN12145_c0_g1_i1;Parent=TRINITY_DN12145_c0_g1_i1.path1;coverage=100.0;identity=100.0;matches=326;mismatches=0;indels=0;unknowns=0
scaffold_1	Conpu1	CDS	3096950	3097144	100	-	0	ID=TRINITY_DN12145_c0_g1_i1.mrna1.cds1;Name=TRINITY_DN12145_c0_g1_i1;Parent=TRINITY_DN12145_c0_g1_i1.mrna1;Target=TRINITY_DN12145_c0_g1_i1 195 1 .
scaffold_1	Conpu1	exon	3144012	3144680	100	-	.	ID=TRINITY_DN6225_c0_g1_i1.mrna1.exon1;Name=TRINITY_DN6225_c0_g1_i1;Parent=TRINITY_DN6225_c0_g1_i1.mrna1;Target=TRINITY_DN6225_c0_g1_i1 669 1 .
scaffold_1	Conpu1	gene	3144012	3144680	.	-	.	ID=TRINITY_DN6225_c0_g1_i1.path1;Name=TRINITY_DN6225_c0_g1_i1
scaffold_1	Conpu1	mRNA	3144012	3144680	.	-	.	ID=TRINITY_DN6225_c0_g1_i1.mrna1;Name=TRINITY_DN6225_c0_g1_i1;Parent=TRINITY_DN6225_c0_g1_i1.path1;coverage=100.0;identity=100.0;matches=669;mismatches=0;indels=0;unknowns=0
scaffold_1	Conpu1	CDS	3144388	3144678	100	-	0	ID=TRINITY_DN6225_c0_g1_i1.mrna1.cds1;Name=TRINITY_DN6225_c0_g1_i1;Parent=TRINITY_DN6225_c0_g1_i1.mrna1;Target=TRINITY_DN6225_c0_g1_i1 293 3 .
scaffold_1	Conpu1	exon	3211899	3212118	100	-	.	ID=TRINITY_DN9779_c0_g1_i1.mrna1.exon1;Name=TRINITY_DN9779_c0_g1_i1;Parent=TRINITY_DN9779_c0_g1_i1.mrna1;Target=TRINITY_DN9779_c0_g1_i1 220 1 .
scaffold_1	Conpu1	gene	3211899	3212118	.	-	.	ID=TRINITY_DN9779_c0_g1_i1.path1;Name=TRINITY_DN9779_c0_g1_i1
scaffold_1	Conpu1	mRNA	3211899	3212118	.	-	.	ID=TRINITY_DN9779_c0_g1_i1.mrna1;Name=TRINITY_DN9779_c0_g1_i1;Parent=TRINITY_DN9779_c0_g1_i1.path1;coverage=100.0;identity=100.0;matches=220;mismatches=0;indels=0;unknowns=0
scaffold_1	Conpu1	CDS	3211941	3212117	100	-	0	ID=TRINITY_DN9779_c0_g1_i1.mrna1.cds1;Name=TRINITY_DN9779_c0_g1_i1;Parent=TRINITY_DN9779_c0_g1_i1.mrna1;Target=TRINITY_DN9779_c0_g1_i1 178 2 .
scaffold_1	Conpu1	CDS	3229162	3229359	100	+	0	ID=TRINITY_DN11281_c0_g1_i1.mrna1.cds1;Name=TRINITY_DN11281_c0_g1_i1;Parent=TRINITY_DN11281_c0_g1_i1.mrna1;Target=TRINITY_DN11281_c0_g1_i1 198 1 .
scaffold_1	Conpu1	exon	3229162	3229382	100	+	.	ID=TRINITY_DN11281_c0_g1_i1.mrna1.exon1;Name=TRINITY_DN11281_c0_g1_i1;Parent=TRINITY_DN11281_c0_g1_i1.mrna1;Target=TRINITY_DN11281_c0_g1_i1 221 1 .
scaffold_1	Conpu1	gene	3229162	3229382	.	+	.	ID=TRINITY_DN11281_c0_g1_i1.path1;Name=TRINITY_DN11281_c0_g1_i1
scaffold_1	Conpu1	mRNA	3229162	3229382	.	+	.	ID=TRINITY_DN11281_c0_g1_i1.mrna1;Name=TRINITY_DN11281_c0_g1_i1;Parent=TRINITY_DN11281_c0_g1_i1.path1;coverage=100.0;identity=100.0;matches=221;mismatches=0;indels=0;unknowns=0
scaffold_1	Conpu1	exon	3233382	3233584	100	-	.	ID=TRINITY_DN6193_c0_g1_i1.mrna1.exon1;Name=TRINITY_DN6193_c0_g1_i1;Parent=TRINITY_DN6193_c0_g1_i1.mrna1;Target=TRINITY_DN6193_c0_g1_i1 203 1 .
scaffold_1	Conpu1	gene	3233382	3233584	.	-	.	ID=TRINITY_DN6193_c0_g1_i1.path1;Name=TRINITY_DN6193_c0_g1_i1
scaffold_1	Conpu1	mRNA	3233382	3233584	.	-	.	ID=TRINITY_DN6193_c0_g1_i1.mrna1;Name=TRINITY_DN6193_c0_g1_i1;Parent=TRINITY_DN6193_c0_g1_i1.path1;coverage=100.0;identity=100.0;matches=203;mismatches=0;indels=0;unknowns=0
scaffold_1	Conpu1	CDS	3233383	3233583	100	-	0	ID=TRINITY_DN6193_c0_g1_i1.mrna1.cds1;Name=TRINITY_DN6193_c0_g1_i1;Parent=TRINITY_DN6193_c0_g1_i1.mrna1;Target=TRINITY_DN6193_c0_g1_i1 202 2 .
scaffold_1	Conpu1	exon	3240180	3240426	100	+	.	ID=TRINITY_DN9836_c0_g1_i1.mrna1.exon1;Name=TRINITY_DN9836_c0_g1_i1;Parent=TRINITY_DN9836_c0_g1_i1.mrna1;Target=TRINITY_DN9836_c0_g1_i1 247 1 .
scaffold_1	Conpu1	gene	3240180	3240426	.	+	.	ID=TRINITY_DN9836_c0_g1_i1.path1;Name=TRINITY_DN9836_c0_g1_i1
scaffold_1	Conpu1	mRNA	3240180	3240426	.	+	.	ID=TRINITY_DN9836_c0_g1_i1.mrna1;Name=TRINITY_DN9836_c0_g1_i1;Parent=TRINITY_DN9836_c0_g1_i1.path1;coverage=100.0;identity=100.0;matches=247;mismatches=0;indels=0;unknowns=0
scaffold_1	Conpu1	CDS	3240247	3240426	100	+	0	ID=TRINITY_DN9836_c0_g1_i1.mrna1.cds1;Name=TRINITY_DN9836_c0_g1_i1;Parent=TRINITY_DN9836_c0_g1_i1.mrna1;Target=TRINITY_DN9836_c0_g1_i1 247 68 .
scaffold_1	Conpu1	exon	3331971	3331982	100	+	.	ID=TRINITY_DN16025_c0_g1_i1.mrna1.exon1;Name=TRINITY_DN16025_c0_g1_i1;Parent=TRINITY_DN16025_c0_g1_i1.mrna1;Target=TRINITY_DN16025_c0_g1_i1 207 218 -
scaffold_1	Conpu1	gene	3331971	3332391	.	+	.	ID=TRINITY_DN16025_c0_g1_i1.path1;Name=TRINITY_DN16025_c0_g1_i1
scaffold_1	Conpu1	mRNA	3331971	3332391	.	+	.	ID=TRINITY_DN16025_c0_g1_i1.mrna1;Name=TRINITY_DN16025_c0_g1_i1;Parent=TRINITY_DN16025_c0_g1_i1.path1;coverage=100.0;identity=100.0;matches=218;mismatches=0;indels=0;unknowns=0
scaffold_1	Conpu1	CDS	3331973	3331982	100	+	0	ID=TRINITY_DN16025_c0_g1_i1.mrna1.cds1;Name=TRINITY_DN16025_c0_g1_i1;Parent=TRINITY_DN16025_c0_g1_i1.mrna1;Target=TRINITY_DN16025_c0_g1_i1 207 216 .
scaffold_1	Conpu1	CDS	3332037	3332066	100	+	1	ID=TRINITY_DN16025_c0_g1_i1.mrna1.cds2;Name=TRINITY_DN16025_c0_g1_i1;Parent=TRINITY_DN16025_c0_g1_i1.mrna1;Target=TRINITY_DN16025_c0_g1_i1 177 206 .
scaffold_1	Conpu1	exon	3332037	3332066	100	+	.	ID=TRINITY_DN16025_c0_g1_i1.mrna1.exon2;Name=TRINITY_DN16025_c0_g1_i1;Parent=TRINITY_DN16025_c0_g1_i1.mrna1;Target=TRINITY_DN16025_c0_g1_i1 177 206 -
scaffold_1	Conpu1	CDS	3332113	3332207	100	+	1	ID=TRINITY_DN16025_c0_g1_i1.mrna1.cds3;Name=TRINITY_DN16025_c0_g1_i1;Parent=TRINITY_DN16025_c0_g1_i1.mrna1;Target=TRINITY_DN16025_c0_g1_i1 82 176 .
scaffold_1	Conpu1	exon	3332113	3332207	100	+	.	ID=TRINITY_DN16025_c0_g1_i1.mrna1.exon3;Name=TRINITY_DN16025_c0_g1_i1;Parent=TRINITY_DN16025_c0_g1_i1.mrna1;Target=TRINITY_DN16025_c0_g1_i1 82 176 -
scaffold_1	Conpu1	CDS	3332259	3332280	100	+	0	ID=TRINITY_DN16025_c0_g1_i1.mrna1.cds4;Name=TRINITY_DN16025_c0_g1_i1;Parent=TRINITY_DN16025_c0_g1_i1.mrna1;Target=TRINITY_DN16025_c0_g1_i1 60 81 .
scaffold_1	Conpu1	exon	3332259	3332280	100	+	.	ID=TRINITY_DN16025_c0_g1_i1.mrna1.exon4;Name=TRINITY_DN16025_c0_g1_i1;Parent=TRINITY_DN16025_c0_g1_i1.mrna1;Target=TRINITY_DN16025_c0_g1_i1 60 81 -
scaffold_1	Conpu1	CDS	3332333	3332391	100	+	1	ID=TRINITY_DN16025_c0_g1_i1.mrna1.cds5;Name=TRINITY_DN16025_c0_g1_i1;Parent=TRINITY_DN16025_c0_g1_i1.mrna1;Target=TRINITY_DN16025_c0_g1_i1 1 59 .
scaffold_1	Conpu1	exon	3332333	3332391	100	+	.	ID=TRINITY_DN16025_c0_g1_i1.mrna1.exon5;Name=TRINITY_DN16025_c0_g1_i1;Parent=TRINITY_DN16025_c0_g1_i1.mrna1;Target=TRINITY_DN16025_c0_g1_i1 1 59 -
scaffold_1	Conpu1	exon	3332677	3332740	100	+	.	ID=TRINITY_DN16386_c0_g1_i1.mrna1.exon1;Name=TRINITY_DN16386_c0_g1_i1;Parent=TRINITY_DN16386_c0_g1_i1.mrna1;Target=TRINITY_DN16386_c0_g1_i1 512 575 -
scaffold_1	Conpu1	gene	3332677	3333468	.	+	.	ID=TRINITY_DN16386_c0_g1_i1.path1;Name=TRINITY_DN16386_c0_g1_i1
scaffold_1	Conpu1	mRNA	3332677	3333468	.	+	.	ID=TRINITY_DN16386_c0_g1_i1.mrna1;Name=TRINITY_DN16386_c0_g1_i1;Parent=TRINITY_DN16386_c0_g1_i1.path1;coverage=98.3;identity=100.0;matches=575;mismatches=0;indels=0;unknowns=0
scaffold_1	Conpu1	CDS	3332678	3332740	100	+	0	ID=TRINITY_DN16386_c0_g1_i1.mrna1.cds1;Name=TRINITY_DN16386_c0_g1_i1;Parent=TRINITY_DN16386_c0_g1_i1.mrna1;Target=TRINITY_DN16386_c0_g1_i1 512 574 .
scaffold_1	Conpu1	CDS	3332792	3332800	100	+	0	ID=TRINITY_DN16386_c0_g1_i1.mrna1.cds2;Name=TRINITY_DN16386_c0_g1_i1;Parent=TRINITY_DN16386_c0_g1_i1.mrna1;Target=TRINITY_DN16386_c0_g1_i1 503 511 .
scaffold_1	Conpu1	exon	3332792	3332800	100	+	.	ID=TRINITY_DN16386_c0_g1_i1.mrna1.exon2;Name=TRINITY_DN16386_c0_g1_i1;Parent=TRINITY_DN16386_c0_g1_i1.mrna1;Target=TRINITY_DN16386_c0_g1_i1 503 511 -
scaffold_1	Conpu1	CDS	3332862	3332900	100	+	0	ID=TRINITY_DN16386_c0_g1_i1.mrna1.cds3;Name=TRINITY_DN16386_c0_g1_i1;Parent=TRINITY_DN16386_c0_g1_i1.mrna1;Target=TRINITY_DN16386_c0_g1_i1 464 502 .
scaffold_1	Conpu1	exon	3332862	3332900	100	+	.	ID=TRINITY_DN16386_c0_g1_i1.mrna1.exon3;Name=TRINITY_DN16386_c0_g1_i1;Parent=TRINITY_DN16386_c0_g1_i1.mrna1;Target=TRINITY_DN16386_c0_g1_i1 464 502 -
scaffold_1	Conpu1	CDS	3332954	3332984	100	+	0	ID=TRINITY_DN16386_c0_g1_i1.mrna1.cds4;Name=TRINITY_DN16386_c0_g1_i1;Parent=TRINITY_DN16386_c0_g1_i1.mrna1;Target=TRINITY_DN16386_c0_g1_i1 433 463 .
scaffold_1	Conpu1	exon	3332954	3332984	100	+	.	ID=TRINITY_DN16386_c0_g1_i1.mrna1.exon4;Name=TRINITY_DN16386_c0_g1_i1;Parent=TRINITY_DN16386_c0_g1_i1.mrna1;Target=TRINITY_DN16386_c0_g1_i1 433 463 -
scaffold_1	Conpu1	CDS	3333037	3333179	100	+	1	ID=TRINITY_DN16386_c0_g1_i1.mrna1.cds5;Name=TRINITY_DN16386_c0_g1_i1;Parent=TRINITY_DN16386_c0_g1_i1.mrna1;Target=TRINITY_DN16386_c0_g1_i1 290 432 .
scaffold_1	Conpu1	exon	3333037	3333468	100	+	.	ID=TRINITY_DN16386_c0_g1_i1.mrna1.exon5;Name=TRINITY_DN16386_c0_g1_i1;Parent=TRINITY_DN16386_c0_g1_i1.mrna1;Target=TRINITY_DN16386_c0_g1_i1 1 432 -
scaffold_1	Conpu1	exon	3339917	3340253	100	-	.	ID=TRINITY_DN13128_c0_g1_i1.mrna1.exon1;Name=TRINITY_DN13128_c0_g1_i1;Parent=TRINITY_DN13128_c0_g1_i1.mrna1;Target=TRINITY_DN13128_c0_g1_i1 337 1 .
scaffold_1	Conpu1	gene	3339917	3340253	.	-	.	ID=TRINITY_DN13128_c0_g1_i1.path1;Name=TRINITY_DN13128_c0_g1_i1
scaffold_1	Conpu1	mRNA	3339917	3340253	.	-	.	ID=TRINITY_DN13128_c0_g1_i1.mrna1;Name=TRINITY_DN13128_c0_g1_i1;Parent=TRINITY_DN13128_c0_g1_i1.path1;coverage=100.0;identity=100.0;matches=337;mismatches=0;indels=0;unknowns=0
scaffold_1	Conpu1	CDS	3340085	3340252	100	-	0	ID=TRINITY_DN13128_c0_g1_i1.mrna1.cds1;Name=TRINITY_DN13128_c0_g1_i1;Parent=TRINITY_DN13128_c0_g1_i1.mrna1;Target=TRINITY_DN13128_c0_g1_i1 169 2 .
scaffold_1	Conpu1	exon	3340233	3340480	100	+	.	ID=TRINITY_DN9662_c0_g1_i1.mrna1.exon1;Name=TRINITY_DN9662_c0_g1_i1;Parent=TRINITY_DN9662_c0_g1_i1.mrna1;Target=TRINITY_DN9662_c0_g1_i1 248 1 .
scaffold_1	Conpu1	gene	3340233	3340480	.	+	.	ID=TRINITY_DN9662_c0_g1_i1.path1;Name=TRINITY_DN9662_c0_g1_i1
scaffold_1	Conpu1	mRNA	3340233	3340480	.	+	.	ID=TRINITY_DN9662_c0_g1_i1.mrna1;Name=TRINITY_DN9662_c0_g1_i1;Parent=TRINITY_DN9662_c0_g1_i1.path1;coverage=100.0;identity=100.0;matches=248;mismatches=0;indels=0;unknowns=0
scaffold_1	Conpu1	CDS	3340235	3340435	100	+	0	ID=TRINITY_DN9662_c0_g1_i1.mrna1.cds1;Name=TRINITY_DN9662_c0_g1_i1;Parent=TRINITY_DN9662_c0_g1_i1.mrna1;Target=TRINITY_DN9662_c0_g1_i1 203 3 .
scaffold_1	Conpu1	CDS	3354574	3354696	100	+	0	ID=TRINITY_DN14485_c0_g1_i1.mrna1.cds1;Name=TRINITY_DN14485_c0_g1_i1;Parent=TRINITY_DN14485_c0_g1_i1.mrna1;Target=TRINITY_DN14485_c0_g1_i1 123 1 .
scaffold_1	Conpu1	exon	3354574	3354881	100	+	.	ID=TRINITY_DN14485_c0_g1_i1.mrna1.exon1;Name=TRINITY_DN14485_c0_g1_i1;Parent=TRINITY_DN14485_c0_g1_i1.mrna1;Target=TRINITY_DN14485_c0_g1_i1 308 1 .
scaffold_1	Conpu1	gene	3354574	3354881	.	+	.	ID=TRINITY_DN14485_c0_g1_i1.path1;Name=TRINITY_DN14485_c0_g1_i1
scaffold_1	Conpu1	mRNA	3354574	3354881	.	+	.	ID=TRINITY_DN14485_c0_g1_i1.mrna1;Name=TRINITY_DN14485_c0_g1_i1;Parent=TRINITY_DN14485_c0_g1_i1.path1;coverage=100.0;identity=100.0;matches=308;mismatches=0;indels=0;unknowns=0
scaffold_1	Conpu1	exon	3354847	3354893	100	+	.	ID=TRINITY_DN1812_c0_g1_i1.mrna1.exon1;Name=TRINITY_DN1812_c0_g1_i1;Parent=TRINITY_DN1812_c0_g1_i1.mrna1;Target=TRINITY_DN1812_c0_g1_i1 315 361 -
scaffold_1	Conpu1	exon	3354847	3354893	100	+	.	ID=TRINITY_DN1812_c0_g1_i2.mrna1.exon1;Name=TRINITY_DN1812_c0_g1_i2;Parent=TRINITY_DN1812_c0_g1_i2.mrna1;Target=TRINITY_DN1812_c0_g1_i2 259 305 -
scaffold_1	Conpu1	gene	3354847	3355306	.	+	.	ID=TRINITY_DN1812_c0_g1_i1.path1;Name=TRINITY_DN1812_c0_g1_i1
scaffold_1	Conpu1	gene	3354847	3355306	.	+	.	ID=TRINITY_DN1812_c0_g1_i2.path1;Name=TRINITY_DN1812_c0_g1_i2
scaffold_1	Conpu1	mRNA	3354847	3355306	.	+	.	ID=TRINITY_DN1812_c0_g1_i1.mrna1;Name=TRINITY_DN1812_c0_g1_i1;Parent=TRINITY_DN1812_c0_g1_i1.path1;coverage=96.2;identity=100.0;matches=352;mismatches=0;indels=0;unknowns=0
scaffold_1	Conpu1	mRNA	3354847	3355306	.	+	.	ID=TRINITY_DN1812_c0_g1_i2.mrna1;Name=TRINITY_DN1812_c0_g1_i2;Parent=TRINITY_DN1812_c0_g1_i2.path1;coverage=95.5;identity=100.0;matches=296;mismatches=0;indels=0;unknowns=0
scaffold_1	Conpu1	exon	3354955	3355033	100	+	.	ID=TRINITY_DN1812_c0_g1_i2.mrna1.exon2;Name=TRINITY_DN1812_c0_g1_i2;Parent=TRINITY_DN1812_c0_g1_i2.mrna1;Target=TRINITY_DN1812_c0_g1_i2 180 258 -
scaffold_1	Conpu1	exon	3354955	3355112	100	+	.	ID=TRINITY_DN1812_c0_g1_i1.mrna1.exon2;Name=TRINITY_DN1812_c0_g1_i1;Parent=TRINITY_DN1812_c0_g1_i1.mrna1;Target=TRINITY_DN1812_c0_g1_i1 157 314 -
scaffold_1	Conpu1	exon	3355090	3355112	100	+	.	ID=TRINITY_DN1812_c0_g1_i2.mrna1.exon3;Name=TRINITY_DN1812_c0_g1_i2;Parent=TRINITY_DN1812_c0_g1_i2.mrna1;Target=TRINITY_DN1812_c0_g1_i2 157 179 -
scaffold_1	Conpu1	CDS	3355097	3355112	100	+	0	ID=TRINITY_DN1812_c0_g1_i1.mrna1.cds1;Name=TRINITY_DN1812_c0_g1_i1;Parent=TRINITY_DN1812_c0_g1_i1.mrna1;Target=TRINITY_DN1812_c0_g1_i1 157 172 .
scaffold_1	Conpu1	CDS	3355097	3355112	100	+	0	ID=TRINITY_DN1812_c0_g1_i2.mrna1.cds1;Name=TRINITY_DN1812_c0_g1_i2;Parent=TRINITY_DN1812_c0_g1_i2.mrna1;Target=TRINITY_DN1812_c0_g1_i2 157 172 .
scaffold_1	Conpu1	CDS	3355160	3355245	100	+	1	ID=TRINITY_DN1812_c0_g1_i1.mrna1.cds2;Name=TRINITY_DN1812_c0_g1_i1;Parent=TRINITY_DN1812_c0_g1_i1.mrna1;Target=TRINITY_DN1812_c0_g1_i1 71 156 .
scaffold_1	Conpu1	CDS	3355160	3355245	100	+	1	ID=TRINITY_DN1812_c0_g1_i2.mrna1.cds2;Name=TRINITY_DN1812_c0_g1_i2;Parent=TRINITY_DN1812_c0_g1_i2.mrna1;Target=TRINITY_DN1812_c0_g1_i2 71 156 .
scaffold_1	Conpu1	exon	3355160	3355306	100	+	.	ID=TRINITY_DN1812_c0_g1_i1.mrna1.exon3;Name=TRINITY_DN1812_c0_g1_i1;Parent=TRINITY_DN1812_c0_g1_i1.mrna1;Target=TRINITY_DN1812_c0_g1_i1 10 156 -
scaffold_1	Conpu1	exon	3355160	3355306	100	+	.	ID=TRINITY_DN1812_c0_g1_i2.mrna1.exon4;Name=TRINITY_DN1812_c0_g1_i2;Parent=TRINITY_DN1812_c0_g1_i2.mrna1;Target=TRINITY_DN1812_c0_g1_i2 10 156 -
scaffold_1	Conpu1	exon	3358126	3358822	100	+	.	ID=TRINITY_DN14975_c0_g1_i1.mrna1.exon1;Name=TRINITY_DN14975_c0_g1_i1;Parent=TRINITY_DN14975_c0_g1_i1.mrna1;Target=TRINITY_DN14975_c0_g1_i1 1 697 +
scaffold_1	Conpu1	gene	3358126	3359028	.	+	.	ID=TRINITY_DN14975_c0_g1_i1.path1;Name=TRINITY_DN14975_c0_g1_i1
scaffold_1	Conpu1	mRNA	3358126	3359028	.	+	.	ID=TRINITY_DN14975_c0_g1_i1.mrna1;Name=TRINITY_DN14975_c0_g1_i1;Parent=TRINITY_DN14975_c0_g1_i1.path1;coverage=99.2;identity=100.0;matches=848;mismatches=0;indels=0;unknowns=0
scaffold_1	Conpu1	CDS	3358127	3358375	100	+	0	ID=TRINITY_DN14975_c0_g1_i1.mrna1.cds1;Name=TRINITY_DN14975_c0_g1_i1;Parent=TRINITY_DN14975_c0_g1_i1.mrna1;Target=TRINITY_DN14975_c0_g1_i1 2 250 +
scaffold_1	Conpu1	exon	3358878	3359028	100	+	.	ID=TRINITY_DN14975_c0_g1_i1.mrna1.exon2;Name=TRINITY_DN14975_c0_g1_i1;Parent=TRINITY_DN14975_c0_g1_i1.mrna1;Target=TRINITY_DN14975_c0_g1_i1 698 848 +
scaffold_1	Conpu1	exon	3397272	3397472	100	+	.	ID=TRINITY_DN6484_c0_g1_i1.mrna1.exon1;Name=TRINITY_DN6484_c0_g1_i1;Parent=TRINITY_DN6484_c0_g1_i1.mrna1;Target=TRINITY_DN6484_c0_g1_i1 201 1 .
scaffold_1	Conpu1	gene	3397272	3397472	.	+	.	ID=TRINITY_DN6484_c0_g1_i1.path1;Name=TRINITY_DN6484_c0_g1_i1
scaffold_1	Conpu1	mRNA	3397272	3397472	.	+	.	ID=TRINITY_DN6484_c0_g1_i1.mrna1;Name=TRINITY_DN6484_c0_g1_i1;Parent=TRINITY_DN6484_c0_g1_i1.path1;coverage=100.0;identity=100.0;matches=201;mismatches=0;indels=0;unknowns=0
scaffold_1	Conpu1	CDS	3397306	3397470	100	+	0	ID=TRINITY_DN6484_c0_g1_i1.mrna1.cds1;Name=TRINITY_DN6484_c0_g1_i1;Parent=TRINITY_DN6484_c0_g1_i1.mrna1;Target=TRINITY_DN6484_c0_g1_i1 199 35 .
scaffold_1	Conpu1	exon	3397833	3398617	100	-	.	ID=TRINITY_DN5674_c0_g1_i1.mrna1.exon1;Name=TRINITY_DN5674_c0_g1_i1;Parent=TRINITY_DN5674_c0_g1_i1.mrna1;Target=TRINITY_DN5674_c0_g1_i1 785 1 .
scaffold_1	Conpu1	gene	3397833	3398617	.	-	.	ID=TRINITY_DN5674_c0_g1_i1.path1;Name=TRINITY_DN5674_c0_g1_i1
scaffold_1	Conpu1	mRNA	3397833	3398617	.	-	.	ID=TRINITY_DN5674_c0_g1_i1.mrna1;Name=TRINITY_DN5674_c0_g1_i1;Parent=TRINITY_DN5674_c0_g1_i1.path1;coverage=100.0;identity=100.0;matches=785;mismatches=0;indels=0;unknowns=0
scaffold_1	Conpu1	CDS	3398125	3398313	100	-	0	ID=TRINITY_DN5674_c0_g1_i1.mrna1.cds1;Name=TRINITY_DN5674_c0_g1_i1;Parent=TRINITY_DN5674_c0_g1_i1.mrna1;Target=TRINITY_DN5674_c0_g1_i1 493 305 .
scaffold_1	Conpu1	exon	3398885	3398954	100	+	.	ID=TRINITY_DN4996_c0_g1_i1.mrna1.exon1;Name=TRINITY_DN4996_c0_g1_i1;Parent=TRINITY_DN4996_c0_g1_i1.mrna1;Target=TRINITY_DN4996_c0_g1_i1 459 528 -
scaffold_1	Conpu1	gene	3398885	3399466	.	+	.	ID=TRINITY_DN4996_c0_g1_i1.path1;Name=TRINITY_DN4996_c0_g1_i1
scaffold_1	Conpu1	mRNA	3398885	3399466	.	+	.	ID=TRINITY_DN4996_c0_g1_i1.mrna1;Name=TRINITY_DN4996_c0_g1_i1;Parent=TRINITY_DN4996_c0_g1_i1.path1;coverage=100.0;identity=100.0;matches=528;mismatches=0;indels=0;unknowns=0
scaffold_1	Conpu1	exon	3399009	3399466	100	+	.	ID=TRINITY_DN4996_c0_g1_i1.mrna1.exon2;Name=TRINITY_DN4996_c0_g1_i1;Parent=TRINITY_DN4996_c0_g1_i1.mrna1;Target=TRINITY_DN4996_c0_g1_i1 1 458 -
scaffold_1	Conpu1	CDS	3399107	3399391	100	+	0	ID=TRINITY_DN4996_c0_g1_i1.mrna1.cds1;Name=TRINITY_DN4996_c0_g1_i1;Parent=TRINITY_DN4996_c0_g1_i1.mrna1;Target=TRINITY_DN4996_c0_g1_i1 76 360 .
scaffold_1	Conpu1	exon	3414363	3414455	98	+	.	ID=TRINITY_DN6563_c0_g1_i1.mrna1.exon1;Name=TRINITY_DN6563_c0_g1_i1;Parent=TRINITY_DN6563_c0_g1_i1.mrna1;Target=TRINITY_DN6563_c0_g1_i1 93 1 .
scaffold_1	Conpu1	gene	3414363	3414682	.	+	.	ID=TRINITY_DN6563_c0_g1_i1.path1;Name=TRINITY_DN6563_c0_g1_i1
scaffold_1	Conpu1	mRNA	3414363	3414682	.	+	.	ID=TRINITY_DN6563_c0_g1_i1.mrna1;Name=TRINITY_DN6563_c0_g1_i1;Parent=TRINITY_DN6563_c0_g1_i1.path1;coverage=100.0;identity=99.6;matches=270;mismatches=1;indels=0;unknowns=0
scaffold_1	Conpu1	CDS	3414424	3414455	100	+	0	ID=TRINITY_DN6563_c0_g1_i1.mrna1.cds1;Name=TRINITY_DN6563_c0_g1_i1;Parent=TRINITY_DN6563_c0_g1_i1.mrna1;Target=TRINITY_DN6563_c0_g1_i1 93 62 .
scaffold_1	Conpu1	CDS	3414505	3414682	100	+	2	ID=TRINITY_DN6563_c0_g1_i1.mrna1.cds2;Name=TRINITY_DN6563_c0_g1_i1;Parent=TRINITY_DN6563_c0_g1_i1.mrna1;Target=TRINITY_DN6563_c0_g1_i1 271 94 .
scaffold_1	Conpu1	exon	3414505	3414682	100	+	.	ID=TRINITY_DN6563_c0_g1_i1.mrna1.exon2;Name=TRINITY_DN6563_c0_g1_i1;Parent=TRINITY_DN6563_c0_g1_i1.mrna1;Target=TRINITY_DN6563_c0_g1_i1 271 94 .
scaffold_1	Conpu1	exon	3436712	3436945	100	-	.	ID=TRINITY_DN14458_c0_g1_i1.mrna1.exon1;Name=TRINITY_DN14458_c0_g1_i1;Parent=TRINITY_DN14458_c0_g1_i1.mrna1;Target=TRINITY_DN14458_c0_g1_i1 234 1 .
scaffold_1	Conpu1	gene	3436712	3436945	.	-	.	ID=TRINITY_DN14458_c0_g1_i1.path1;Name=TRINITY_DN14458_c0_g1_i1
scaffold_1	Conpu1	mRNA	3436712	3436945	.	-	.	ID=TRINITY_DN14458_c0_g1_i1.mrna1;Name=TRINITY_DN14458_c0_g1_i1;Parent=TRINITY_DN14458_c0_g1_i1.path1;coverage=100.0;identity=100.0;matches=234;mismatches=0;indels=0;unknowns=0
scaffold_1	Conpu1	CDS	3436751	3436945	100	-	0	ID=TRINITY_DN14458_c0_g1_i1.mrna1.cds1;Name=TRINITY_DN14458_c0_g1_i1;Parent=TRINITY_DN14458_c0_g1_i1.mrna1;Target=TRINITY_DN14458_c0_g1_i1 195 1 .
scaffold_1	Conpu1	exon	3436926	3437609	100	-	.	ID=TRINITY_DN16244_c0_g1_i1.mrna1.exon1;Name=TRINITY_DN16244_c0_g1_i1;Parent=TRINITY_DN16244_c0_g1_i1.mrna1;Target=TRINITY_DN16244_c0_g1_i1 684 1 .
scaffold_1	Conpu1	gene	3436926	3437609	.	-	.	ID=TRINITY_DN16244_c0_g1_i1.path1;Name=TRINITY_DN16244_c0_g1_i1
scaffold_1	Conpu1	mRNA	3436926	3437609	.	-	.	ID=TRINITY_DN16244_c0_g1_i1.mrna1;Name=TRINITY_DN16244_c0_g1_i1;Parent=TRINITY_DN16244_c0_g1_i1.path1;coverage=100.0;identity=100.0;matches=684;mismatches=0;indels=0;unknowns=0
scaffold_1	Conpu1	CDS	3437243	3437347	100	-	0	ID=TRINITY_DN16244_c0_g1_i1.mrna1.cds1;Name=TRINITY_DN16244_c0_g1_i1;Parent=TRINITY_DN16244_c0_g1_i1.mrna1;Target=TRINITY_DN16244_c0_g1_i1 367 263 .
scaffold_1	Conpu1	exon	3439072	3439142	100	+	.	ID=TRINITY_DN9481_c0_g1_i1.mrna1.exon1;Name=TRINITY_DN9481_c0_g1_i1;Parent=TRINITY_DN9481_c0_g1_i1.mrna1;Target=TRINITY_DN9481_c0_g1_i1 1 71 +
scaffold_1	Conpu1	gene	3439072	3439344	.	+	.	ID=TRINITY_DN9481_c0_g1_i1.path1;Name=TRINITY_DN9481_c0_g1_i1
scaffold_1	Conpu1	mRNA	3439072	3439344	.	+	.	ID=TRINITY_DN9481_c0_g1_i1.mrna1;Name=TRINITY_DN9481_c0_g1_i1;Parent=TRINITY_DN9481_c0_g1_i1.path1;coverage=100.0;identity=100.0;matches=210;mismatches=0;indels=0;unknowns=0
scaffold_1	Conpu1	CDS	3439074	3439142	100	+	0	ID=TRINITY_DN9481_c0_g1_i1.mrna1.cds1;Name=TRINITY_DN9481_c0_g1_i1;Parent=TRINITY_DN9481_c0_g1_i1.mrna1;Target=TRINITY_DN9481_c0_g1_i1 3 71 +
scaffold_1	Conpu1	CDS	3439206	3439232	100	+	0	ID=TRINITY_DN9481_c0_g1_i1.mrna1.cds2;Name=TRINITY_DN9481_c0_g1_i1;Parent=TRINITY_DN9481_c0_g1_i1.mrna1;Target=TRINITY_DN9481_c0_g1_i1 72 98 +
scaffold_1	Conpu1	exon	3439206	3439344	100	+	.	ID=TRINITY_DN9481_c0_g1_i1.mrna1.exon2;Name=TRINITY_DN9481_c0_g1_i1;Parent=TRINITY_DN9481_c0_g1_i1.mrna1;Target=TRINITY_DN9481_c0_g1_i1 72 210 +
scaffold_1	Conpu1	exon	3439324	3439411	100	+	.	ID=TRINITY_DN12688_c0_g1_i1.mrna1.exon1;Name=TRINITY_DN12688_c0_g1_i1;Parent=TRINITY_DN12688_c0_g1_i1.mrna1;Target=TRINITY_DN12688_c0_g1_i1 1 88 +
scaffold_1	Conpu1	gene	3439324	3439626	.	+	.	ID=TRINITY_DN12688_c0_g1_i1.path1;Name=TRINITY_DN12688_c0_g1_i1
scaffold_1	Conpu1	mRNA	3439324	3439626	.	+	.	ID=TRINITY_DN12688_c0_g1_i1.mrna1;Name=TRINITY_DN12688_c0_g1_i1;Parent=TRINITY_DN12688_c0_g1_i1.path1;coverage=96.9;identity=100.0;matches=252;mismatches=0;indels=0;unknowns=0
scaffold_1	Conpu1	CDS	3439325	3439411	100	+	0	ID=TRINITY_DN12688_c0_g1_i1.mrna1.cds1;Name=TRINITY_DN12688_c0_g1_i1;Parent=TRINITY_DN12688_c0_g1_i1.mrna1;Target=TRINITY_DN12688_c0_g1_i1 2 88 +
scaffold_1	Conpu1	CDS	3439463	3439549	100	+	0	ID=TRINITY_DN12688_c0_g1_i1.mrna1.cds2;Name=TRINITY_DN12688_c0_g1_i1;Parent=TRINITY_DN12688_c0_g1_i1.mrna1;Target=TRINITY_DN12688_c0_g1_i1 89 175 +
scaffold_1	Conpu1	exon	3439463	3439626	100	+	.	ID=TRINITY_DN12688_c0_g1_i1.mrna1.exon2;Name=TRINITY_DN12688_c0_g1_i1;Parent=TRINITY_DN12688_c0_g1_i1.mrna1;Target=TRINITY_DN12688_c0_g1_i1 89 252 +
scaffold_1	Conpu1	CDS	3440312	3440404	100	+	0	ID=TRINITY_DN9230_c0_g1_i1.mrna1.cds1;Name=TRINITY_DN9230_c0_g1_i1;Parent=TRINITY_DN9230_c0_g1_i1.mrna1;Target=TRINITY_DN9230_c0_g1_i1 93 1 .
scaffold_1	Conpu1	exon	3440312	3440728	100	+	.	ID=TRINITY_DN9230_c0_g1_i1.mrna1.exon1;Name=TRINITY_DN9230_c0_g1_i1;Parent=TRINITY_DN9230_c0_g1_i1.mrna1;Target=TRINITY_DN9230_c0_g1_i1 417 1 .
scaffold_1	Conpu1	gene	3440312	3440728	.	+	.	ID=TRINITY_DN9230_c0_g1_i1.path1;Name=TRINITY_DN9230_c0_g1_i1
scaffold_1	Conpu1	mRNA	3440312	3440728	.	+	.	ID=TRINITY_DN9230_c0_g1_i1.mrna1;Name=TRINITY_DN9230_c0_g1_i1;Parent=TRINITY_DN9230_c0_g1_i1.path1;coverage=100.0;identity=100.0;matches=417;mismatches=0;indels=0;unknowns=0
scaffold_1	Conpu1	exon	3452204	3452440	100	+	.	ID=TRINITY_DN14723_c0_g1_i1.mrna1.exon1;Name=TRINITY_DN14723_c0_g1_i1;Parent=TRINITY_DN14723_c0_g1_i1.mrna1;Target=TRINITY_DN14723_c0_g1_i1 237 1 .
scaffold_1	Conpu1	gene	3452204	3452440	.	+	.	ID=TRINITY_DN14723_c0_g1_i1.path1;Name=TRINITY_DN14723_c0_g1_i1
scaffold_1	Conpu1	mRNA	3452204	3452440	.	+	.	ID=TRINITY_DN14723_c0_g1_i1.mrna1;Name=TRINITY_DN14723_c0_g1_i1;Parent=TRINITY_DN14723_c0_g1_i1.path1;coverage=100.0;identity=100.0;matches=237;mismatches=0;indels=0;unknowns=0
scaffold_1	Conpu1	CDS	3452205	3452288	100	+	0	ID=TRINITY_DN14723_c0_g1_i1.mrna1.cds1;Name=TRINITY_DN14723_c0_g1_i1;Parent=TRINITY_DN14723_c0_g1_i1.mrna1;Target=TRINITY_DN14723_c0_g1_i1 85 2 .
scaffold_1	Conpu1	exon	3452509	3452752	100	+	.	ID=TRINITY_DN6232_c0_g1_i1.mrna1.exon1;Name=TRINITY_DN6232_c0_g1_i1;Parent=TRINITY_DN6232_c0_g1_i1.mrna1;Target=TRINITY_DN6232_c0_g1_i1 244 1 .
scaffold_1	Conpu1	gene	3452509	3452752	.	+	.	ID=TRINITY_DN6232_c0_g1_i1.path1;Name=TRINITY_DN6232_c0_g1_i1
scaffold_1	Conpu1	mRNA	3452509	3452752	.	+	.	ID=TRINITY_DN6232_c0_g1_i1.mrna1;Name=TRINITY_DN6232_c0_g1_i1;Parent=TRINITY_DN6232_c0_g1_i1.path1;coverage=100.0;identity=100.0;matches=244;mismatches=0;indels=0;unknowns=0
scaffold_1	Conpu1	CDS	3452511	3452693	100	+	0	ID=TRINITY_DN6232_c0_g1_i1.mrna1.cds1;Name=TRINITY_DN6232_c0_g1_i1;Parent=TRINITY_DN6232_c0_g1_i1.mrna1;Target=TRINITY_DN6232_c0_g1_i1 185 3 .
scaffold_1	Conpu1	CDS	3452733	3452822	100	+	0	ID=TRINITY_DN10275_c0_g1_i1.mrna1.cds1;Name=TRINITY_DN10275_c0_g1_i1;Parent=TRINITY_DN10275_c0_g1_i1.mrna1;Target=TRINITY_DN10275_c0_g1_i1 90 1 .
scaffold_1	Conpu1	exon	3452733	3452974	100	+	.	ID=TRINITY_DN10275_c0_g1_i1.mrna1.exon1;Name=TRINITY_DN10275_c0_g1_i1;Parent=TRINITY_DN10275_c0_g1_i1.mrna1;Target=TRINITY_DN10275_c0_g1_i1 242 1 .
scaffold_1	Conpu1	gene	3452733	3452974	.	+	.	ID=TRINITY_DN10275_c0_g1_i1.path1;Name=TRINITY_DN10275_c0_g1_i1
scaffold_1	Conpu1	mRNA	3452733	3452974	.	+	.	ID=TRINITY_DN10275_c0_g1_i1.mrna1;Name=TRINITY_DN10275_c0_g1_i1;Parent=TRINITY_DN10275_c0_g1_i1.path1;coverage=100.0;identity=100.0;matches=242;mismatches=0;indels=0;unknowns=0
scaffold_1	Conpu1	CDS	3501465	3501614	100	+	0	ID=TRINITY_DN1351_c1_g1_i1.mrna1.cds1;Name=TRINITY_DN1351_c1_g1_i1;Parent=TRINITY_DN1351_c1_g1_i1.mrna1;Target=TRINITY_DN1351_c1_g1_i1 150 1 .
scaffold_1	Conpu1	exon	3501465	3501684	100	+	.	ID=TRINITY_DN1351_c1_g1_i1.mrna1.exon1;Name=TRINITY_DN1351_c1_g1_i1;Parent=TRINITY_DN1351_c1_g1_i1.mrna1;Target=TRINITY_DN1351_c1_g1_i1 220 1 .
scaffold_1	Conpu1	gene	3501465	3501684	.	+	.	ID=TRINITY_DN1351_c1_g1_i1.path1;Name=TRINITY_DN1351_c1_g1_i1
scaffold_1	Conpu1	mRNA	3501465	3501684	.	+	.	ID=TRINITY_DN1351_c1_g1_i1.mrna1;Name=TRINITY_DN1351_c1_g1_i1;Parent=TRINITY_DN1351_c1_g1_i1.path1;coverage=100.0;identity=100.0;matches=220;mismatches=0;indels=0;unknowns=0
scaffold_1	Conpu1	exon	3505273	3505676	100	-	.	ID=TRINITY_DN16522_c0_g1_i1.mrna1.exon1;Name=TRINITY_DN16522_c0_g1_i1;Parent=TRINITY_DN16522_c0_g1_i1.mrna1;Target=TRINITY_DN16522_c0_g1_i1 404 1 .
scaffold_1	Conpu1	gene	3505273	3505676	.	-	.	ID=TRINITY_DN16522_c0_g1_i1.path1;Name=TRINITY_DN16522_c0_g1_i1
scaffold_1	Conpu1	mRNA	3505273	3505676	.	-	.	ID=TRINITY_DN16522_c0_g1_i1.mrna1;Name=TRINITY_DN16522_c0_g1_i1;Parent=TRINITY_DN16522_c0_g1_i1.path1;coverage=100.0;identity=100.0;matches=404;mismatches=0;indels=0;unknowns=0
scaffold_1	Conpu1	CDS	3505507	3505674	100	-	0	ID=TRINITY_DN16522_c0_g1_i1.mrna1.cds1;Name=TRINITY_DN16522_c0_g1_i1;Parent=TRINITY_DN16522_c0_g1_i1.mrna1;Target=TRINITY_DN16522_c0_g1_i1 170 3 .
scaffold_1	Conpu1	exon	3505656	3506174	100	+	.	ID=TRINITY_DN217_c0_g1_i1.mrna1.exon1;Name=TRINITY_DN217_c0_g1_i1;Parent=TRINITY_DN217_c0_g1_i1.mrna1;Target=TRINITY_DN217_c0_g1_i1 519 1 .
scaffold_1	Conpu1	gene	3505656	3506174	.	+	.	ID=TRINITY_DN217_c0_g1_i1.path1;Name=TRINITY_DN217_c0_g1_i1
scaffold_1	Conpu1	mRNA	3505656	3506174	.	+	.	ID=TRINITY_DN217_c0_g1_i1.mrna1;Name=TRINITY_DN217_c0_g1_i1;Parent=TRINITY_DN217_c0_g1_i1.path1;coverage=100.0;identity=100.0;matches=519;mismatches=0;indels=0;unknowns=0
scaffold_1	Conpu1	CDS	3505688	3506119	100	+	0	ID=TRINITY_DN217_c0_g1_i1.mrna1.cds1;Name=TRINITY_DN217_c0_g1_i1;Parent=TRINITY_DN217_c0_g1_i1.mrna1;Target=TRINITY_DN217_c0_g1_i1 464 33 .
scaffold_1	Conpu1	exon	3507312	3507840	100	+	.	ID=TRINITY_DN14232_c0_g1_i1.mrna1.exon1;Name=TRINITY_DN14232_c0_g1_i1;Parent=TRINITY_DN14232_c0_g1_i1.mrna1;Target=TRINITY_DN14232_c0_g1_i1 529 1 .
scaffold_1	Conpu1	gene	3507312	3507840	.	+	.	ID=TRINITY_DN14232_c0_g1_i1.path1;Name=TRINITY_DN14232_c0_g1_i1
scaffold_1	Conpu1	mRNA	3507312	3507840	.	+	.	ID=TRINITY_DN14232_c0_g1_i1.mrna1;Name=TRINITY_DN14232_c0_g1_i1;Parent=TRINITY_DN14232_c0_g1_i1.path1;coverage=100.0;identity=100.0;matches=529;mismatches=0;indels=0;unknowns=0
scaffold_1	Conpu1	CDS	3507314	3507424	100	+	0	ID=TRINITY_DN14232_c0_g1_i1.mrna1.cds1;Name=TRINITY_DN14232_c0_g1_i1;Parent=TRINITY_DN14232_c0_g1_i1.mrna1;Target=TRINITY_DN14232_c0_g1_i1 113 3 .
scaffold_1	Conpu1	exon	3507822	3508208	100	-	.	ID=TRINITY_DN16055_c0_g1_i1.mrna1.exon1;Name=TRINITY_DN16055_c0_g1_i1;Parent=TRINITY_DN16055_c0_g1_i1.mrna1;Target=TRINITY_DN16055_c0_g1_i1 388 2 .
scaffold_1	Conpu1	gene	3507822	3508208	.	-	.	ID=TRINITY_DN16055_c0_g1_i1.path1;Name=TRINITY_DN16055_c0_g1_i1
scaffold_1	Conpu1	mRNA	3507822	3508208	.	-	.	ID=TRINITY_DN16055_c0_g1_i1.mrna1;Name=TRINITY_DN16055_c0_g1_i1;Parent=TRINITY_DN16055_c0_g1_i1.path1;coverage=99.7;identity=100.0;matches=387;mismatches=0;indels=0;unknowns=0
scaffold_1	Conpu1	CDS	3507824	3508123	100	-	0	ID=TRINITY_DN16055_c0_g1_i1.mrna1.cds1;Name=TRINITY_DN16055_c0_g1_i1;Parent=TRINITY_DN16055_c0_g1_i1.mrna1;Target=TRINITY_DN16055_c0_g1_i1 386 87 .
scaffold_1	Conpu1	exon	3509100	3509499	100	+	.	ID=TRINITY_DN6143_c0_g1_i1.mrna1.exon1;Name=TRINITY_DN6143_c0_g1_i1;Parent=TRINITY_DN6143_c0_g1_i1.mrna1;Target=TRINITY_DN6143_c0_g1_i1 400 1 .
scaffold_1	Conpu1	gene	3509100	3509499	.	+	.	ID=TRINITY_DN6143_c0_g1_i1.path1;Name=TRINITY_DN6143_c0_g1_i1
scaffold_1	Conpu1	mRNA	3509100	3509499	.	+	.	ID=TRINITY_DN6143_c0_g1_i1.mrna1;Name=TRINITY_DN6143_c0_g1_i1;Parent=TRINITY_DN6143_c0_g1_i1.path1;coverage=100.0;identity=100.0;matches=400;mismatches=0;indels=0;unknowns=0
scaffold_1	Conpu1	CDS	3509325	3509486	100	+	0	ID=TRINITY_DN6143_c0_g1_i1.mrna1.cds1;Name=TRINITY_DN6143_c0_g1_i1;Parent=TRINITY_DN6143_c0_g1_i1.mrna1;Target=TRINITY_DN6143_c0_g1_i1 387 226 .
scaffold_1	Conpu1	exon	3512080	3512447	100	-	.	ID=TRINITY_DN3669_c0_g1_i1.mrna1.exon1;Name=TRINITY_DN3669_c0_g1_i1;Parent=TRINITY_DN3669_c0_g1_i1.mrna1;Target=TRINITY_DN3669_c0_g1_i1 368 1 .
scaffold_1	Conpu1	gene	3512080	3512447	.	-	.	ID=TRINITY_DN3669_c0_g1_i1.path1;Name=TRINITY_DN3669_c0_g1_i1
scaffold_1	Conpu1	mRNA	3512080	3512447	.	-	.	ID=TRINITY_DN3669_c0_g1_i1.mrna1;Name=TRINITY_DN3669_c0_g1_i1;Parent=TRINITY_DN3669_c0_g1_i1.path1;coverage=100.0;identity=100.0;matches=368;mismatches=0;indels=0;unknowns=0
scaffold_1	Conpu1	CDS	3512328	3512447	100	-	0	ID=TRINITY_DN3669_c0_g1_i1.mrna1.cds1;Name=TRINITY_DN3669_c0_g1_i1;Parent=TRINITY_DN3669_c0_g1_i1.mrna1;Target=TRINITY_DN3669_c0_g1_i1 120 1 .
scaffold_1	Conpu1	CDS	3512432	3512614	100	+	0	ID=TRINITY_DN7990_c0_g1_i1.mrna1.cds1;Name=TRINITY_DN7990_c0_g1_i1;Parent=TRINITY_DN7990_c0_g1_i1.mrna1;Target=TRINITY_DN7990_c0_g1_i1 183 1 .
scaffold_1	Conpu1	exon	3512432	3512743	100	+	.	ID=TRINITY_DN7990_c0_g1_i1.mrna1.exon1;Name=TRINITY_DN7990_c0_g1_i1;Parent=TRINITY_DN7990_c0_g1_i1.mrna1;Target=TRINITY_DN7990_c0_g1_i1 312 1 .
scaffold_1	Conpu1	gene	3512432	3512743	.	+	.	ID=TRINITY_DN7990_c0_g1_i1.path1;Name=TRINITY_DN7990_c0_g1_i1
scaffold_1	Conpu1	mRNA	3512432	3512743	.	+	.	ID=TRINITY_DN7990_c0_g1_i1.mrna1;Name=TRINITY_DN7990_c0_g1_i1;Parent=TRINITY_DN7990_c0_g1_i1.path1;coverage=100.0;identity=100.0;matches=312;mismatches=0;indels=0;unknowns=0
scaffold_1	Conpu1	CDS	3512722	3512865	100	+	0	ID=TRINITY_DN6643_c0_g1_i1.mrna1.cds1;Name=TRINITY_DN6643_c0_g1_i1;Parent=TRINITY_DN6643_c0_g1_i1.mrna1;Target=TRINITY_DN6643_c0_g1_i1 144 1 .
scaffold_1	Conpu1	exon	3512722	3512941	100	+	.	ID=TRINITY_DN6643_c0_g1_i1.mrna1.exon1;Name=TRINITY_DN6643_c0_g1_i1;Parent=TRINITY_DN6643_c0_g1_i1.mrna1;Target=TRINITY_DN6643_c0_g1_i1 220 1 .
scaffold_1	Conpu1	gene	3512722	3512941	.	+	.	ID=TRINITY_DN6643_c0_g1_i1.path1;Name=TRINITY_DN6643_c0_g1_i1
scaffold_1	Conpu1	mRNA	3512722	3512941	.	+	.	ID=TRINITY_DN6643_c0_g1_i1.mrna1;Name=TRINITY_DN6643_c0_g1_i1;Parent=TRINITY_DN6643_c0_g1_i1.path1;coverage=100.0;identity=100.0;matches=220;mismatches=0;indels=0;unknowns=0
scaffold_1	Conpu1	exon	3620965	3621255	100	+	.	ID=TRINITY_DN6014_c0_g1_i1.mrna1.exon1;Name=TRINITY_DN6014_c0_g1_i1;Parent=TRINITY_DN6014_c0_g1_i1.mrna1;Target=TRINITY_DN6014_c0_g1_i1 89 379 -
scaffold_1	Conpu1	gene	3620965	3621400	.	+	.	ID=TRINITY_DN6014_c0_g1_i1.path1;Name=TRINITY_DN6014_c0_g1_i1
scaffold_1	Conpu1	mRNA	3620965	3621400	.	+	.	ID=TRINITY_DN6014_c0_g1_i1.mrna1;Name=TRINITY_DN6014_c0_g1_i1;Parent=TRINITY_DN6014_c0_g1_i1.path1;coverage=100.0;identity=100.0;matches=379;mismatches=0;indels=0;unknowns=0
scaffold_1	Conpu1	CDS	3620967	3621116	100	+	0	ID=TRINITY_DN6014_c0_g1_i1.mrna1.cds1;Name=TRINITY_DN6014_c0_g1_i1;Parent=TRINITY_DN6014_c0_g1_i1.mrna1;Target=TRINITY_DN6014_c0_g1_i1 228 377 .
scaffold_1	Conpu1	exon	3621313	3621400	100	+	.	ID=TRINITY_DN6014_c0_g1_i1.mrna1.exon2;Name=TRINITY_DN6014_c0_g1_i1;Parent=TRINITY_DN6014_c0_g1_i1.mrna1;Target=TRINITY_DN6014_c0_g1_i1 1 88 -
scaffold_1	Conpu1	exon	3621380	3621832	100	+	.	ID=TRINITY_DN15651_c0_g1_i1.mrna1.exon1;Name=TRINITY_DN15651_c0_g1_i1;Parent=TRINITY_DN15651_c0_g1_i1.mrna1;Target=TRINITY_DN15651_c0_g1_i1 453 1 .
scaffold_1	Conpu1	gene	3621380	3621832	.	+	.	ID=TRINITY_DN15651_c0_g1_i1.path1;Name=TRINITY_DN15651_c0_g1_i1
scaffold_1	Conpu1	mRNA	3621380	3621832	.	+	.	ID=TRINITY_DN15651_c0_g1_i1.mrna1;Name=TRINITY_DN15651_c0_g1_i1;Parent=TRINITY_DN15651_c0_g1_i1.path1;coverage=99.6;identity=100.0;matches=453;mismatches=0;indels=0;unknowns=0
scaffold_1	Conpu1	CDS	3621382	3621570	100	+	0	ID=TRINITY_DN15651_c0_g1_i1.mrna1.cds1;Name=TRINITY_DN15651_c0_g1_i1;Parent=TRINITY_DN15651_c0_g1_i1.mrna1;Target=TRINITY_DN15651_c0_g1_i1 191 3 .
scaffold_1	Conpu1	exon	3626722	3626923	100	-	.	ID=TRINITY_DN6649_c0_g1_i1.mrna1.exon1;Name=TRINITY_DN6649_c0_g1_i1;Parent=TRINITY_DN6649_c0_g1_i1.mrna1;Target=TRINITY_DN6649_c0_g1_i1 202 1 .
scaffold_1	Conpu1	gene	3626722	3626923	.	-	.	ID=TRINITY_DN6649_c0_g1_i1.path1;Name=TRINITY_DN6649_c0_g1_i1
scaffold_1	Conpu1	mRNA	3626722	3626923	.	-	.	ID=TRINITY_DN6649_c0_g1_i1.mrna1;Name=TRINITY_DN6649_c0_g1_i1;Parent=TRINITY_DN6649_c0_g1_i1.path1;coverage=100.0;identity=100.0;matches=202;mismatches=0;indels=0;unknowns=0
scaffold_1	Conpu1	CDS	3626863	3626922	100	-	0	ID=TRINITY_DN6649_c0_g1_i1.mrna1.cds1;Name=TRINITY_DN6649_c0_g1_i1;Parent=TRINITY_DN6649_c0_g1_i1.mrna1;Target=TRINITY_DN6649_c0_g1_i1 61 2 .
scaffold_1	Conpu1	exon	3682312	3682574	100	-	.	ID=TRINITY_DN16062_c0_g1_i1.mrna1.exon3;Name=TRINITY_DN16062_c0_g1_i1;Parent=TRINITY_DN16062_c0_g1_i1.mrna1;Target=TRINITY_DN16062_c0_g1_i1 1 263 -
scaffold_1	Conpu1	gene	3682312	3682928	.	-	.	ID=TRINITY_DN16062_c0_g1_i1.path1;Name=TRINITY_DN16062_c0_g1_i1
scaffold_1	Conpu1	mRNA	3682312	3682928	.	-	.	ID=TRINITY_DN16062_c0_g1_i1.mrna1;Name=TRINITY_DN16062_c0_g1_i1;Parent=TRINITY_DN16062_c0_g1_i1.path1;coverage=100.0;identity=100.0;matches=477;mismatches=0;indels=0;unknowns=0
scaffold_1	Conpu1	exon	3682629	3682729	100	-	.	ID=TRINITY_DN16062_c0_g1_i1.mrna1.exon2;Name=TRINITY_DN16062_c0_g1_i1;Parent=TRINITY_DN16062_c0_g1_i1.mrna1;Target=TRINITY_DN16062_c0_g1_i1 264 364 -
scaffold_1	Conpu1	CDS	3682679	3682729	100	-	0	ID=TRINITY_DN16062_c0_g1_i1.mrna1.cds2;Name=TRINITY_DN16062_c0_g1_i1;Parent=TRINITY_DN16062_c0_g1_i1.mrna1;Target=TRINITY_DN16062_c0_g1_i1 314 364 .
scaffold_1	Conpu1	CDS	3682816	3682926	100	-	0	ID=TRINITY_DN16062_c0_g1_i1.mrna1.cds1;Name=TRINITY_DN16062_c0_g1_i1;Parent=TRINITY_DN16062_c0_g1_i1.mrna1;Target=TRINITY_DN16062_c0_g1_i1 365 475 .
scaffold_1	Conpu1	exon	3682816	3682928	100	-	.	ID=TRINITY_DN16062_c0_g1_i1.mrna1.exon1;Name=TRINITY_DN16062_c0_g1_i1;Parent=TRINITY_DN16062_c0_g1_i1.mrna1;Target=TRINITY_DN16062_c0_g1_i1 365 477 -
scaffold_1	Conpu1	exon	3712108	3712582	100	+	.	ID=TRINITY_DN15871_c0_g1_i1.mrna1.exon1;Name=TRINITY_DN15871_c0_g1_i1;Parent=TRINITY_DN15871_c0_g1_i1.mrna1;Target=TRINITY_DN15871_c0_g1_i1 475 1 .
scaffold_1	Conpu1	gene	3712108	3712582	.	+	.	ID=TRINITY_DN15871_c0_g1_i1.path1;Name=TRINITY_DN15871_c0_g1_i1
scaffold_1	Conpu1	mRNA	3712108	3712582	.	+	.	ID=TRINITY_DN15871_c0_g1_i1.mrna1;Name=TRINITY_DN15871_c0_g1_i1;Parent=TRINITY_DN15871_c0_g1_i1.path1;coverage=100.0;identity=100.0;matches=475;mismatches=0;indels=0;unknowns=0
scaffold_1	Conpu1	CDS	3712196	3712330	100	+	0	ID=TRINITY_DN15871_c0_g1_i1.mrna1.cds1;Name=TRINITY_DN15871_c0_g1_i1;Parent=TRINITY_DN15871_c0_g1_i1.mrna1;Target=TRINITY_DN15871_c0_g1_i1 223 89 .
scaffold_1	Conpu1	exon	3718482	3718759	100	+	.	ID=TRINITY_DN15872_c0_g1_i1.mrna1.exon1;Name=TRINITY_DN15872_c0_g1_i1;Parent=TRINITY_DN15872_c0_g1_i1.mrna1;Target=TRINITY_DN15872_c0_g1_i1 278 1 .
scaffold_1	Conpu1	gene	3718482	3718759	.	+	.	ID=TRINITY_DN15872_c0_g1_i1.path1;Name=TRINITY_DN15872_c0_g1_i1
scaffold_1	Conpu1	mRNA	3718482	3718759	.	+	.	ID=TRINITY_DN15872_c0_g1_i1.mrna1;Name=TRINITY_DN15872_c0_g1_i1;Parent=TRINITY_DN15872_c0_g1_i1.path1;coverage=100.0;identity=100.0;matches=278;mismatches=0;indels=0;unknowns=0
scaffold_1	Conpu1	CDS	3718627	3718758	100	+	0	ID=TRINITY_DN15872_c0_g1_i1.mrna1.cds1;Name=TRINITY_DN15872_c0_g1_i1;Parent=TRINITY_DN15872_c0_g1_i1.mrna1;Target=TRINITY_DN15872_c0_g1_i1 277 146 .
scaffold_1	Conpu1	exon	3718846	3719702	100	+	.	ID=TRINITY_DN15077_c0_g1_i1.mrna1.exon1;Name=TRINITY_DN15077_c0_g1_i1;Parent=TRINITY_DN15077_c0_g1_i1.mrna1;Target=TRINITY_DN15077_c0_g1_i1 860 4 .
scaffold_1	Conpu1	gene	3718846	3719702	.	+	.	ID=TRINITY_DN15077_c0_g1_i1.path1;Name=TRINITY_DN15077_c0_g1_i1
scaffold_1	Conpu1	mRNA	3718846	3719702	.	+	.	ID=TRINITY_DN15077_c0_g1_i1.mrna1;Name=TRINITY_DN15077_c0_g1_i1;Parent=TRINITY_DN15077_c0_g1_i1.path1;coverage=99.7;identity=100.0;matches=857;mismatches=0;indels=0;unknowns=0
scaffold_1	Conpu1	CDS	3719445	3719702	100	+	0	ID=TRINITY_DN15077_c0_g1_i1.mrna1.cds1;Name=TRINITY_DN15077_c0_g1_i1;Parent=TRINITY_DN15077_c0_g1_i1.mrna1;Target=TRINITY_DN15077_c0_g1_i1 860 603 .
scaffold_1	Conpu1	exon	3727331	3727576	100	+	.	ID=TRINITY_DN9544_c0_g1_i1.mrna1.exon1;Name=TRINITY_DN9544_c0_g1_i1;Parent=TRINITY_DN9544_c0_g1_i1.mrna1;Target=TRINITY_DN9544_c0_g1_i1 246 1 .
scaffold_1	Conpu1	gene	3727331	3727576	.	+	.	ID=TRINITY_DN9544_c0_g1_i1.path1;Name=TRINITY_DN9544_c0_g1_i1
scaffold_1	Conpu1	mRNA	3727331	3727576	.	+	.	ID=TRINITY_DN9544_c0_g1_i1.mrna1;Name=TRINITY_DN9544_c0_g1_i1;Parent=TRINITY_DN9544_c0_g1_i1.path1;coverage=100.0;identity=100.0;matches=246;mismatches=0;indels=0;unknowns=0
scaffold_1	Conpu1	CDS	3727332	3727442	100	+	0	ID=TRINITY_DN9544_c0_g1_i1.mrna1.cds1;Name=TRINITY_DN9544_c0_g1_i1;Parent=TRINITY_DN9544_c0_g1_i1.mrna1;Target=TRINITY_DN9544_c0_g1_i1 112 2 .
scaffold_1	Conpu1	exon	3727902	3728176	100	+	.	ID=TRINITY_DN16020_c0_g1_i1.mrna1.exon1;Name=TRINITY_DN16020_c0_g1_i1;Parent=TRINITY_DN16020_c0_g1_i1.mrna1;Target=TRINITY_DN16020_c0_g1_i1 275 1 .
scaffold_1	Conpu1	gene	3727902	3728176	.	+	.	ID=TRINITY_DN16020_c0_g1_i1.path1;Name=TRINITY_DN16020_c0_g1_i1
scaffold_1	Conpu1	mRNA	3727902	3728176	.	+	.	ID=TRINITY_DN16020_c0_g1_i1.mrna1;Name=TRINITY_DN16020_c0_g1_i1;Parent=TRINITY_DN16020_c0_g1_i1.path1;coverage=100.0;identity=100.0;matches=275;mismatches=0;indels=0;unknowns=0
scaffold_1	Conpu1	CDS	3727904	3728017	100	+	0	ID=TRINITY_DN16020_c0_g1_i1.mrna1.cds1;Name=TRINITY_DN16020_c0_g1_i1;Parent=TRINITY_DN16020_c0_g1_i1.mrna1;Target=TRINITY_DN16020_c0_g1_i1 116 3 .
scaffold_1	Conpu1	CDS	3748891	3749022	100	+	0	ID=TRINITY_DN6601_c0_g1_i1.mrna1.cds1;Name=TRINITY_DN6601_c0_g1_i1;Parent=TRINITY_DN6601_c0_g1_i1.mrna1;Target=TRINITY_DN6601_c0_g1_i1 132 1 .
scaffold_1	Conpu1	exon	3748891	3749172	100	+	.	ID=TRINITY_DN6601_c0_g1_i1.mrna1.exon1;Name=TRINITY_DN6601_c0_g1_i1;Parent=TRINITY_DN6601_c0_g1_i1.mrna1;Target=TRINITY_DN6601_c0_g1_i1 282 1 .
scaffold_1	Conpu1	gene	3748891	3749172	.	+	.	ID=TRINITY_DN6601_c0_g1_i1.path1;Name=TRINITY_DN6601_c0_g1_i1
scaffold_1	Conpu1	mRNA	3748891	3749172	.	+	.	ID=TRINITY_DN6601_c0_g1_i1.mrna1;Name=TRINITY_DN6601_c0_g1_i1;Parent=TRINITY_DN6601_c0_g1_i1.path1;coverage=100.0;identity=100.0;matches=282;mismatches=0;indels=0;unknowns=0
scaffold_1	Conpu1	exon	3792610	3792882	100	+	.	ID=TRINITY_DN12997_c0_g1_i1.mrna1.exon1;Name=TRINITY_DN12997_c0_g1_i1;Parent=TRINITY_DN12997_c0_g1_i1.mrna1;Target=TRINITY_DN12997_c0_g1_i1 282 10 .
scaffold_1	Conpu1	gene	3792610	3792882	.	+	.	ID=TRINITY_DN12997_c0_g1_i1.path1;Name=TRINITY_DN12997_c0_g1_i1
scaffold_1	Conpu1	mRNA	3792610	3792882	.	+	.	ID=TRINITY_DN12997_c0_g1_i1.mrna1;Name=TRINITY_DN12997_c0_g1_i1;Parent=TRINITY_DN12997_c0_g1_i1.path1;coverage=96.8;identity=100.0;matches=273;mismatches=0;indels=0;unknowns=0
scaffold_1	Conpu1	CDS	3792658	3792837	100	+	0	ID=TRINITY_DN12997_c0_g1_i1.mrna1.cds1;Name=TRINITY_DN12997_c0_g1_i1;Parent=TRINITY_DN12997_c0_g1_i1.mrna1;Target=TRINITY_DN12997_c0_g1_i1 237 58 .
scaffold_1	Conpu1	exon	3812679	3812911	100	-	.	ID=TRINITY_DN16551_c0_g1_i1.mrna1.exon1;Name=TRINITY_DN16551_c0_g1_i1;Parent=TRINITY_DN16551_c0_g1_i1.mrna1;Target=TRINITY_DN16551_c0_g1_i1 233 1 .
scaffold_1	Conpu1	gene	3812679	3812911	.	-	.	ID=TRINITY_DN16551_c0_g1_i1.path1;Name=TRINITY_DN16551_c0_g1_i1
scaffold_1	Conpu1	mRNA	3812679	3812911	.	-	.	ID=TRINITY_DN16551_c0_g1_i1.mrna1;Name=TRINITY_DN16551_c0_g1_i1;Parent=TRINITY_DN16551_c0_g1_i1.path1;coverage=100.0;identity=100.0;matches=233;mismatches=0;indels=0;unknowns=0
scaffold_1	Conpu1	CDS	3812700	3812909	100	-	0	ID=TRINITY_DN16551_c0_g1_i1.mrna1.cds1;Name=TRINITY_DN16551_c0_g1_i1;Parent=TRINITY_DN16551_c0_g1_i1.mrna1;Target=TRINITY_DN16551_c0_g1_i1 212 3 .
scaffold_1	Conpu1	exon	3812902	3813468	100	+	.	ID=TRINITY_DN5056_c0_g1_i1.mrna1.exon1;Name=TRINITY_DN5056_c0_g1_i1;Parent=TRINITY_DN5056_c0_g1_i1.mrna1;Target=TRINITY_DN5056_c0_g1_i1 567 1 .
scaffold_1	Conpu1	gene	3812902	3813468	.	+	.	ID=TRINITY_DN5056_c0_g1_i1.path1;Name=TRINITY_DN5056_c0_g1_i1
scaffold_1	Conpu1	mRNA	3812902	3813468	.	+	.	ID=TRINITY_DN5056_c0_g1_i1.mrna1;Name=TRINITY_DN5056_c0_g1_i1;Parent=TRINITY_DN5056_c0_g1_i1.path1;coverage=100.0;identity=100.0;matches=567;mismatches=0;indels=0;unknowns=0
scaffold_1	Conpu1	CDS	3812903	3813058	100	+	0	ID=TRINITY_DN5056_c0_g1_i1.mrna1.cds1;Name=TRINITY_DN5056_c0_g1_i1;Parent=TRINITY_DN5056_c0_g1_i1.mrna1;Target=TRINITY_DN5056_c0_g1_i1 157 2 .
scaffold_1	Conpu1	CDS	3816052	3816288	99	-	0	ID=TRINITY_DN12928_c0_g1_i1.mrna1.cds1;Name=TRINITY_DN12928_c0_g1_i1;Parent=TRINITY_DN12928_c0_g1_i1.mrna1;Target=TRINITY_DN12928_c0_g1_i1 237 1 .
scaffold_1	Conpu1	exon	3816052	3816288	99	-	.	ID=TRINITY_DN12928_c0_g1_i1.mrna1.exon1;Name=TRINITY_DN12928_c0_g1_i1;Parent=TRINITY_DN12928_c0_g1_i1.mrna1;Target=TRINITY_DN12928_c0_g1_i1 237 1 .
scaffold_1	Conpu1	gene	3816052	3816288	.	-	.	ID=TRINITY_DN12928_c0_g1_i1.path1;Name=TRINITY_DN12928_c0_g1_i1
scaffold_1	Conpu1	mRNA	3816052	3816288	.	-	.	ID=TRINITY_DN12928_c0_g1_i1.mrna1;Name=TRINITY_DN12928_c0_g1_i1;Parent=TRINITY_DN12928_c0_g1_i1.path1;coverage=100.0;identity=99.6;matches=236;mismatches=1;indels=0;unknowns=0
scaffold_1	Conpu1	exon	3832741	3832799	100	+	.	ID=TRINITY_DN3119_c0_g1_i2.mrna1.exon1;Name=TRINITY_DN3119_c0_g1_i2;Parent=TRINITY_DN3119_c0_g1_i2.mrna1;Target=TRINITY_DN3119_c0_g1_i2 279 337 -
scaffold_1	Conpu1	exon	3832741	3832799	100	+	.	ID=TRINITY_DN3119_c0_g1_i4.mrna1.exon1;Name=TRINITY_DN3119_c0_g1_i4;Parent=TRINITY_DN3119_c0_g1_i4.mrna1;Target=TRINITY_DN3119_c0_g1_i4 279 337 -
scaffold_1	Conpu1	gene	3832741	3833127	.	+	.	ID=TRINITY_DN3119_c0_g1_i2.path1;Name=TRINITY_DN3119_c0_g1_i2
scaffold_1	Conpu1	gene	3832741	3833127	.	+	.	ID=TRINITY_DN3119_c0_g1_i4.path1;Name=TRINITY_DN3119_c0_g1_i4
scaffold_1	Conpu1	mRNA	3832741	3833127	.	+	.	ID=TRINITY_DN3119_c0_g1_i2.mrna1;Name=TRINITY_DN3119_c0_g1_i2;Parent=TRINITY_DN3119_c0_g1_i2.path1;coverage=97.6;identity=99.7;matches=328;mismatches=1;indels=0;unknowns=0
scaffold_1	Conpu1	mRNA	3832741	3833127	.	+	.	ID=TRINITY_DN3119_c0_g1_i4.mrna1;Name=TRINITY_DN3119_c0_g1_i4;Parent=TRINITY_DN3119_c0_g1_i4.path1;coverage=97.6;identity=97.6;matches=321;mismatches=8;indels=0;unknowns=0
scaffold_1	Conpu1	exon	3832858	3833127	97	+	.	ID=TRINITY_DN3119_c0_g1_i4.mrna1.exon2;Name=TRINITY_DN3119_c0_g1_i4;Parent=TRINITY_DN3119_c0_g1_i4.mrna1;Target=TRINITY_DN3119_c0_g1_i4 9 278 -
scaffold_1	Conpu1	exon	3832858	3833127	99	+	.	ID=TRINITY_DN3119_c0_g1_i2.mrna1.exon2;Name=TRINITY_DN3119_c0_g1_i2;Parent=TRINITY_DN3119_c0_g1_i2.mrna1;Target=TRINITY_DN3119_c0_g1_i2 9 278 -
scaffold_1	Conpu1	exon	3832866	3833127	96	-	.	ID=TRINITY_DN3119_c0_g1_i3.mrna1.exon1;Name=TRINITY_DN3119_c0_g1_i3;Parent=TRINITY_DN3119_c0_g1_i3.mrna1;Target=TRINITY_DN3119_c0_g1_i3 270 9 .
scaffold_1	Conpu1	exon	3832866	3833127	99	-	.	ID=TRINITY_DN3119_c0_g1_i5.mrna1.exon1;Name=TRINITY_DN3119_c0_g1_i5;Parent=TRINITY_DN3119_c0_g1_i5.mrna1;Target=TRINITY_DN3119_c0_g1_i5 270 9 .
scaffold_1	Conpu1	gene	3832866	3833127	.	-	.	ID=TRINITY_DN3119_c0_g1_i3.path1;Name=TRINITY_DN3119_c0_g1_i3
scaffold_1	Conpu1	gene	3832866	3833127	.	-	.	ID=TRINITY_DN3119_c0_g1_i5.path1;Name=TRINITY_DN3119_c0_g1_i5
scaffold_1	Conpu1	mRNA	3832866	3833127	.	-	.	ID=TRINITY_DN3119_c0_g1_i3.mrna1;Name=TRINITY_DN3119_c0_g1_i3;Parent=TRINITY_DN3119_c0_g1_i3.path1;coverage=77.5;identity=96.9;matches=254;mismatches=8;indels=0;unknowns=0
scaffold_1	Conpu1	mRNA	3832866	3833127	.	-	.	ID=TRINITY_DN3119_c0_g1_i5.mrna1;Name=TRINITY_DN3119_c0_g1_i5;Parent=TRINITY_DN3119_c0_g1_i5.path1;coverage=77.5;identity=99.6;matches=261;mismatches=1;indels=0;unknowns=0
scaffold_1	Conpu1	CDS	3832912	3833052	99	-	0	ID=TRINITY_DN3119_c0_g1_i5.mrna1.cds1;Name=TRINITY_DN3119_c0_g1_i5;Parent=TRINITY_DN3119_c0_g1_i5.mrna1;Target=TRINITY_DN3119_c0_g1_i5 224 84 .
scaffold_1	Conpu1	CDS	3832916	3833068	94	+	0	ID=TRINITY_DN3119_c0_g1_i4.mrna1.cds1;Name=TRINITY_DN3119_c0_g1_i4;Parent=TRINITY_DN3119_c0_g1_i4.mrna1;Target=TRINITY_DN3119_c0_g1_i4 68 220 .
scaffold_1	Conpu1	CDS	3832916	3833068	99	+	0	ID=TRINITY_DN3119_c0_g1_i2.mrna1.cds1;Name=TRINITY_DN3119_c0_g1_i2;Parent=TRINITY_DN3119_c0_g1_i2.mrna1;Target=TRINITY_DN3119_c0_g1_i2 68 220 .
scaffold_1	Conpu1	CDS	3832984	3833052	95	-	0	ID=TRINITY_DN3119_c0_g1_i3.mrna1.cds1;Name=TRINITY_DN3119_c0_g1_i3;Parent=TRINITY_DN3119_c0_g1_i3.mrna1;Target=TRINITY_DN3119_c0_g1_i3 152 84 .
scaffold_1	Conpu1	exon	3839547	3839836	100	-	.	ID=TRINITY_DN13998_c0_g1_i1.mrna1.exon1;Name=TRINITY_DN13998_c0_g1_i1;Parent=TRINITY_DN13998_c0_g1_i1.mrna1;Target=TRINITY_DN13998_c0_g1_i1 290 1 .
scaffold_1	Conpu1	gene	3839547	3839836	.	-	.	ID=TRINITY_DN13998_c0_g1_i1.path1;Name=TRINITY_DN13998_c0_g1_i1
scaffold_1	Conpu1	mRNA	3839547	3839836	.	-	.	ID=TRINITY_DN13998_c0_g1_i1.mrna1;Name=TRINITY_DN13998_c0_g1_i1;Parent=TRINITY_DN13998_c0_g1_i1.path1;coverage=100.0;identity=100.0;matches=290;mismatches=0;indels=0;unknowns=0
scaffold_1	Conpu1	CDS	3839728	3839835	100	-	0	ID=TRINITY_DN13998_c0_g1_i1.mrna1.cds1;Name=TRINITY_DN13998_c0_g1_i1;Parent=TRINITY_DN13998_c0_g1_i1.mrna1;Target=TRINITY_DN13998_c0_g1_i1 109 2 .
scaffold_1	Conpu1	exon	3840242	3840577	100	+	.	ID=TRINITY_DN5224_c0_g1_i1.mrna1.exon1;Name=TRINITY_DN5224_c0_g1_i1;Parent=TRINITY_DN5224_c0_g1_i1.mrna1;Target=TRINITY_DN5224_c0_g1_i1 336 1 .
scaffold_1	Conpu1	gene	3840242	3840577	.	+	.	ID=TRINITY_DN5224_c0_g1_i1.path1;Name=TRINITY_DN5224_c0_g1_i1
scaffold_1	Conpu1	mRNA	3840242	3840577	.	+	.	ID=TRINITY_DN5224_c0_g1_i1.mrna1;Name=TRINITY_DN5224_c0_g1_i1;Parent=TRINITY_DN5224_c0_g1_i1.path1;coverage=100.0;identity=100.0;matches=336;mismatches=0;indels=0;unknowns=0
scaffold_1	Conpu1	CDS	3840430	3840507	100	+	0	ID=TRINITY_DN5224_c0_g1_i1.mrna1.cds1;Name=TRINITY_DN5224_c0_g1_i1;Parent=TRINITY_DN5224_c0_g1_i1.mrna1;Target=TRINITY_DN5224_c0_g1_i1 266 189 .
scaffold_1	Conpu1	exon	3906248	3906741	100	-	.	ID=TRINITY_DN670_c0_g1_i3.mrna1.exon2;Name=TRINITY_DN670_c0_g1_i3;Parent=TRINITY_DN670_c0_g1_i3.mrna1;Target=TRINITY_DN670_c0_g1_i3 80 573 +
scaffold_1	Conpu1	exon	3906248	3906816	100	+	.	ID=TRINITY_DN670_c0_g1_i1.mrna1.exon1;Name=TRINITY_DN670_c0_g1_i1;Parent=TRINITY_DN670_c0_g1_i1.mrna1;Target=TRINITY_DN670_c0_g1_i1 21 589 -
scaffold_1	Conpu1	exon	3906248	3906871	100	-	.	ID=TRINITY_DN670_c0_g1_i2.mrna1.exon1;Name=TRINITY_DN670_c0_g1_i2;Parent=TRINITY_DN670_c0_g1_i2.mrna1;Target=TRINITY_DN670_c0_g1_i2 624 1 .
scaffold_1	Conpu1	gene	3906248	3906871	.	-	.	ID=TRINITY_DN670_c0_g1_i2.path1;Name=TRINITY_DN670_c0_g1_i2
scaffold_1	Conpu1	gene	3906248	3906871	.	-	.	ID=TRINITY_DN670_c0_g1_i3.path1;Name=TRINITY_DN670_c0_g1_i3
scaffold_1	Conpu1	gene	3906248	3906898	.	+	.	ID=TRINITY_DN670_c0_g1_i1.path1;Name=TRINITY_DN670_c0_g1_i1
scaffold_1	Conpu1	mRNA	3906248	3906871	.	-	.	ID=TRINITY_DN670_c0_g1_i2.mrna1;Name=TRINITY_DN670_c0_g1_i2;Parent=TRINITY_DN670_c0_g1_i2.path1;coverage=100.0;identity=100.0;matches=624;mismatches=0;indels=0;unknowns=0
scaffold_1	Conpu1	mRNA	3906248	3906871	.	-	.	ID=TRINITY_DN670_c0_g1_i3.mrna1;Name=TRINITY_DN670_c0_g1_i3;Parent=TRINITY_DN670_c0_g1_i3.path1;coverage=100.0;identity=100.0;matches=573;mismatches=0;indels=0;unknowns=0
scaffold_1	Conpu1	mRNA	3906248	3906898	.	+	.	ID=TRINITY_DN670_c0_g1_i1.mrna1;Name=TRINITY_DN670_c0_g1_i1;Parent=TRINITY_DN670_c0_g1_i1.path1;coverage=100.0;identity=100.0;matches=589;mismatches=0;indels=0;unknowns=0
scaffold_1	Conpu1	CDS	3906288	3906581	100	-	0	ID=TRINITY_DN670_c0_g1_i3.mrna1.cds1;Name=TRINITY_DN670_c0_g1_i3;Parent=TRINITY_DN670_c0_g1_i3.mrna1;Target=TRINITY_DN670_c0_g1_i3 240 533 +
scaffold_1	Conpu1	CDS	3906510	3906647	100	+	0	ID=TRINITY_DN670_c0_g1_i1.mrna1.cds1;Name=TRINITY_DN670_c0_g1_i1;Parent=TRINITY_DN670_c0_g1_i1.mrna1;Target=TRINITY_DN670_c0_g1_i1 190 327 .
scaffold_1	Conpu1	CDS	3906542	3906871	100	-	0	ID=TRINITY_DN670_c0_g1_i2.mrna1.cds1;Name=TRINITY_DN670_c0_g1_i2;Parent=TRINITY_DN670_c0_g1_i2.mrna1;Target=TRINITY_DN670_c0_g1_i2 330 1 .
scaffold_1	Conpu1	exon	3906793	3906871	100	-	.	ID=TRINITY_DN670_c0_g1_i3.mrna1.exon1;Name=TRINITY_DN670_c0_g1_i3;Parent=TRINITY_DN670_c0_g1_i3.mrna1;Target=TRINITY_DN670_c0_g1_i3 1 79 +
scaffold_1	Conpu1	exon	3906855	3907095	100	-	.	ID=TRINITY_DN13617_c0_g1_i1.mrna1.exon3;Name=TRINITY_DN13617_c0_g1_i1;Parent=TRINITY_DN13617_c0_g1_i1.mrna1;Target=TRINITY_DN13617_c0_g1_i1 1 241 -
scaffold_1	Conpu1	gene	3906855	3907598	.	-	.	ID=TRINITY_DN13617_c0_g1_i1.path1;Name=TRINITY_DN13617_c0_g1_i1
scaffold_1	Conpu1	mRNA	3906855	3907598	.	-	.	ID=TRINITY_DN13617_c0_g1_i1.mrna1;Name=TRINITY_DN13617_c0_g1_i1;Parent=TRINITY_DN13617_c0_g1_i1.path1;coverage=100.0;identity=100.0;matches=635;mismatches=0;indels=0;unknowns=0
scaffold_1	Conpu1	exon	3906879	3906898	100	+	.	ID=TRINITY_DN670_c0_g1_i1.mrna1.exon2;Name=TRINITY_DN670_c0_g1_i1;Parent=TRINITY_DN670_c0_g1_i1.mrna1;Target=TRINITY_DN670_c0_g1_i1 1 20 -
scaffold_1	Conpu1	CDS	3907087	3907095	100	-	0	ID=TRINITY_DN13617_c0_g1_i1.mrna1.cds3;Name=TRINITY_DN13617_c0_g1_i1;Parent=TRINITY_DN13617_c0_g1_i1.mrna1;Target=TRINITY_DN13617_c0_g1_i1 233 241 .
scaffold_1	Conpu1	CDS	3907144	3907193	100	-	1	ID=TRINITY_DN13617_c0_g1_i1.mrna1.cds2;Name=TRINITY_DN13617_c0_g1_i1;Parent=TRINITY_DN13617_c0_g1_i1.mrna1;Target=TRINITY_DN13617_c0_g1_i1 242 291 .
scaffold_1	Conpu1	exon	3907144	3907193	100	-	.	ID=TRINITY_DN13617_c0_g1_i1.mrna1.exon2;Name=TRINITY_DN13617_c0_g1_i1;Parent=TRINITY_DN13617_c0_g1_i1.mrna1;Target=TRINITY_DN13617_c0_g1_i1 242 291 -
scaffold_1	Conpu1	CDS	3907255	3907426	100	-	0	ID=TRINITY_DN13617_c0_g1_i1.mrna1.cds1;Name=TRINITY_DN13617_c0_g1_i1;Parent=TRINITY_DN13617_c0_g1_i1.mrna1;Target=TRINITY_DN13617_c0_g1_i1 292 463 .
scaffold_1	Conpu1	exon	3907255	3907598	100	-	.	ID=TRINITY_DN13617_c0_g1_i1.mrna1.exon1;Name=TRINITY_DN13617_c0_g1_i1;Parent=TRINITY_DN13617_c0_g1_i1.mrna1;Target=TRINITY_DN13617_c0_g1_i1 292 635 -
scaffold_1	Conpu1	exon	3962954	3963267	100	+	.	ID=TRINITY_DN9899_c0_g1_i1.mrna1.exon1;Name=TRINITY_DN9899_c0_g1_i1;Parent=TRINITY_DN9899_c0_g1_i1.mrna1;Target=TRINITY_DN9899_c0_g1_i1 314 1 .
scaffold_1	Conpu1	gene	3962954	3963267	.	+	.	ID=TRINITY_DN9899_c0_g1_i1.path1;Name=TRINITY_DN9899_c0_g1_i1
scaffold_1	Conpu1	mRNA	3962954	3963267	.	+	.	ID=TRINITY_DN9899_c0_g1_i1.mrna1;Name=TRINITY_DN9899_c0_g1_i1;Parent=TRINITY_DN9899_c0_g1_i1.path1;coverage=100.0;identity=100.0;matches=314;mismatches=0;indels=0;unknowns=0
scaffold_1	Conpu1	CDS	3963089	3963256	100	+	0	ID=TRINITY_DN9899_c0_g1_i1.mrna1.cds1;Name=TRINITY_DN9899_c0_g1_i1;Parent=TRINITY_DN9899_c0_g1_i1.mrna1;Target=TRINITY_DN9899_c0_g1_i1 303 136 .
scaffold_1	Conpu1	exon	4001803	4002069	100	-	.	ID=TRINITY_DN9834_c0_g1_i1.mrna1.exon1;Name=TRINITY_DN9834_c0_g1_i1;Parent=TRINITY_DN9834_c0_g1_i1.mrna1;Target=TRINITY_DN9834_c0_g1_i1 267 1 .
scaffold_1	Conpu1	gene	4001803	4002069	.	-	.	ID=TRINITY_DN9834_c0_g1_i1.path1;Name=TRINITY_DN9834_c0_g1_i1
scaffold_1	Conpu1	mRNA	4001803	4002069	.	-	.	ID=TRINITY_DN9834_c0_g1_i1.mrna1;Name=TRINITY_DN9834_c0_g1_i1;Parent=TRINITY_DN9834_c0_g1_i1.path1;coverage=100.0;identity=100.0;matches=267;mismatches=0;indels=0;unknowns=0
scaffold_1	Conpu1	CDS	4001828	4001929	100	-	0	ID=TRINITY_DN9834_c0_g1_i1.mrna1.cds1;Name=TRINITY_DN9834_c0_g1_i1;Parent=TRINITY_DN9834_c0_g1_i1.mrna1;Target=TRINITY_DN9834_c0_g1_i1 242 141 .
scaffold_1	Conpu1	exon	4039117	4039335	100	-	.	ID=TRINITY_DN6358_c0_g1_i1.mrna1.exon1;Name=TRINITY_DN6358_c0_g1_i1;Parent=TRINITY_DN6358_c0_g1_i1.mrna1;Target=TRINITY_DN6358_c0_g1_i1 219 1 .
scaffold_1	Conpu1	gene	4039117	4039335	.	-	.	ID=TRINITY_DN6358_c0_g1_i1.path1;Name=TRINITY_DN6358_c0_g1_i1
scaffold_1	Conpu1	mRNA	4039117	4039335	.	-	.	ID=TRINITY_DN6358_c0_g1_i1.mrna1;Name=TRINITY_DN6358_c0_g1_i1;Parent=TRINITY_DN6358_c0_g1_i1.path1;coverage=100.0;identity=100.0;matches=219;mismatches=0;indels=0;unknowns=0
scaffold_1	Conpu1	CDS	4039118	4039333	100	-	0	ID=TRINITY_DN6358_c0_g1_i1.mrna1.cds1;Name=TRINITY_DN6358_c0_g1_i1;Parent=TRINITY_DN6358_c0_g1_i1.mrna1;Target=TRINITY_DN6358_c0_g1_i1 218 3 .
scaffold_1	Conpu1	exon	4040591	4040837	100	-	.	ID=TRINITY_DN9239_c0_g1_i1.mrna1.exon4;Name=TRINITY_DN9239_c0_g1_i1;Parent=TRINITY_DN9239_c0_g1_i1.mrna1;Target=TRINITY_DN9239_c0_g1_i1 256 502 +
scaffold_1	Conpu1	gene	4040591	4041282	.	-	.	ID=TRINITY_DN9239_c0_g1_i1.path1;Name=TRINITY_DN9239_c0_g1_i1
scaffold_1	Conpu1	mRNA	4040591	4041282	.	-	.	ID=TRINITY_DN9239_c0_g1_i1.mrna1;Name=TRINITY_DN9239_c0_g1_i1;Parent=TRINITY_DN9239_c0_g1_i1.path1;coverage=100.0;identity=100.0;matches=502;mismatches=0;indels=0;unknowns=0
scaffold_1	Conpu1	exon	4040885	4040924	100	-	.	ID=TRINITY_DN9239_c0_g1_i1.mrna1.exon3;Name=TRINITY_DN9239_c0_g1_i1;Parent=TRINITY_DN9239_c0_g1_i1.mrna1;Target=TRINITY_DN9239_c0_g1_i1 216 255 +
scaffold_1	Conpu1	exon	4041012	4041096	100	-	.	ID=TRINITY_DN9239_c0_g1_i1.mrna1.exon2;Name=TRINITY_DN9239_c0_g1_i1;Parent=TRINITY_DN9239_c0_g1_i1.mrna1;Target=TRINITY_DN9239_c0_g1_i1 131 215 +
scaffold_1	Conpu1	CDS	4041021	4041096	100	-	2	ID=TRINITY_DN9239_c0_g1_i1.mrna1.cds2;Name=TRINITY_DN9239_c0_g1_i1;Parent=TRINITY_DN9239_c0_g1_i1.mrna1;Target=TRINITY_DN9239_c0_g1_i1 131 206 +
scaffold_1	Conpu1	CDS	4041153	4041232	100	-	0	ID=TRINITY_DN9239_c0_g1_i1.mrna1.cds1;Name=TRINITY_DN9239_c0_g1_i1;Parent=TRINITY_DN9239_c0_g1_i1.mrna1;Target=TRINITY_DN9239_c0_g1_i1 51 130 +
scaffold_1	Conpu1	exon	4041153	4041282	100	-	.	ID=TRINITY_DN9239_c0_g1_i1.mrna1.exon1;Name=TRINITY_DN9239_c0_g1_i1;Parent=TRINITY_DN9239_c0_g1_i1.mrna1;Target=TRINITY_DN9239_c0_g1_i1 1 130 +
scaffold_1	Conpu1	exon	4046208	4046428	99	+	.	ID=TRINITY_DN15448_c0_g1_i1.mrna1.exon1;Name=TRINITY_DN15448_c0_g1_i1;Parent=TRINITY_DN15448_c0_g1_i1.mrna1;Target=TRINITY_DN15448_c0_g1_i1 221 1 .
scaffold_1	Conpu1	gene	4046208	4046428	.	+	.	ID=TRINITY_DN15448_c0_g1_i1.path1;Name=TRINITY_DN15448_c0_g1_i1
scaffold_1	Conpu1	mRNA	4046208	4046428	.	+	.	ID=TRINITY_DN15448_c0_g1_i1.mrna1;Name=TRINITY_DN15448_c0_g1_i1;Parent=TRINITY_DN15448_c0_g1_i1.path1;coverage=100.0;identity=99.5;matches=220;mismatches=1;indels=0;unknowns=0
scaffold_1	Conpu1	CDS	4046277	4046426	100	+	0	ID=TRINITY_DN15448_c0_g1_i1.mrna1.cds1;Name=TRINITY_DN15448_c0_g1_i1;Parent=TRINITY_DN15448_c0_g1_i1.mrna1;Target=TRINITY_DN15448_c0_g1_i1 219 70 .
scaffold_1	Conpu1	exon	4057920	4058631	100	-	.	ID=TRINITY_DN7137_c0_g1_i1.mrna1.exon2;Name=TRINITY_DN7137_c0_g1_i1;Parent=TRINITY_DN7137_c0_g1_i1.mrna1;Target=TRINITY_DN7137_c0_g1_i1 138 849 +
scaffold_1	Conpu1	gene	4057920	4058827	.	-	.	ID=TRINITY_DN7137_c0_g1_i1.path1;Name=TRINITY_DN7137_c0_g1_i1
scaffold_1	Conpu1	mRNA	4057920	4058827	.	-	.	ID=TRINITY_DN7137_c0_g1_i1.mrna1;Name=TRINITY_DN7137_c0_g1_i1;Parent=TRINITY_DN7137_c0_g1_i1.path1;coverage=100.0;identity=100.0;matches=849;mismatches=0;indels=0;unknowns=0
scaffold_1	Conpu1	CDS	4058480	4058631	100	-	1	ID=TRINITY_DN7137_c0_g1_i1.mrna1.cds2;Name=TRINITY_DN7137_c0_g1_i1;Parent=TRINITY_DN7137_c0_g1_i1.mrna1;Target=TRINITY_DN7137_c0_g1_i1 138 289 +
scaffold_1	Conpu1	CDS	4058691	4058826	100	-	0	ID=TRINITY_DN7137_c0_g1_i1.mrna1.cds1;Name=TRINITY_DN7137_c0_g1_i1;Parent=TRINITY_DN7137_c0_g1_i1.mrna1;Target=TRINITY_DN7137_c0_g1_i1 2 137 +
scaffold_1	Conpu1	exon	4058691	4058827	100	-	.	ID=TRINITY_DN7137_c0_g1_i1.mrna1.exon1;Name=TRINITY_DN7137_c0_g1_i1;Parent=TRINITY_DN7137_c0_g1_i1.mrna1;Target=TRINITY_DN7137_c0_g1_i1 1 137 +
scaffold_1	Conpu1	exon	4064095	4064519	100	-	.	ID=TRINITY_DN9679_c0_g1_i1.mrna1.exon1;Name=TRINITY_DN9679_c0_g1_i1;Parent=TRINITY_DN9679_c0_g1_i1.mrna1;Target=TRINITY_DN9679_c0_g1_i1 425 1 .
scaffold_1	Conpu1	gene	4064095	4064519	.	-	.	ID=TRINITY_DN9679_c0_g1_i1.path1;Name=TRINITY_DN9679_c0_g1_i1
scaffold_1	Conpu1	mRNA	4064095	4064519	.	-	.	ID=TRINITY_DN9679_c0_g1_i1.mrna1;Name=TRINITY_DN9679_c0_g1_i1;Parent=TRINITY_DN9679_c0_g1_i1.path1;coverage=100.0;identity=100.0;matches=425;mismatches=0;indels=0;unknowns=0
scaffold_1	Conpu1	CDS	4064097	4064249	100	-	0	ID=TRINITY_DN9679_c0_g1_i1.mrna1.cds1;Name=TRINITY_DN9679_c0_g1_i1;Parent=TRINITY_DN9679_c0_g1_i1.mrna1;Target=TRINITY_DN9679_c0_g1_i1 423 271 .
scaffold_1	Conpu1	CDS	4070238	4070351	100	+	0	ID=TRINITY_DN6376_c0_g1_i1.mrna1.cds1;Name=TRINITY_DN6376_c0_g1_i1;Parent=TRINITY_DN6376_c0_g1_i1.mrna1;Target=TRINITY_DN6376_c0_g1_i1 216 329 .
scaffold_1	Conpu1	exon	4070238	4070516	100	+	.	ID=TRINITY_DN6376_c0_g1_i1.mrna1.exon1;Name=TRINITY_DN6376_c0_g1_i1;Parent=TRINITY_DN6376_c0_g1_i1.mrna1;Target=TRINITY_DN6376_c0_g1_i1 51 329 -
scaffold_1	Conpu1	gene	4070238	4070700	.	+	.	ID=TRINITY_DN6376_c0_g1_i1.path1;Name=TRINITY_DN6376_c0_g1_i1
scaffold_1	Conpu1	mRNA	4070238	4070700	.	+	.	ID=TRINITY_DN6376_c0_g1_i1.mrna1;Name=TRINITY_DN6376_c0_g1_i1;Parent=TRINITY_DN6376_c0_g1_i1.path1;coverage=99.7;identity=100.0;matches=328;mismatches=0;indels=0;unknowns=0
scaffold_1	Conpu1	exon	4070652	4070700	100	+	.	ID=TRINITY_DN6376_c0_g1_i1.mrna1.exon2;Name=TRINITY_DN6376_c0_g1_i1;Parent=TRINITY_DN6376_c0_g1_i1.mrna1;Target=TRINITY_DN6376_c0_g1_i1 2 50 -
scaffold_1	Conpu1	exon	4070794	4071218	100	+	.	ID=TRINITY_DN12734_c0_g1_i1.mrna1.exon1;Name=TRINITY_DN12734_c0_g1_i1;Parent=TRINITY_DN12734_c0_g1_i1.mrna1;Target=TRINITY_DN12734_c0_g1_i1 425 1 .
scaffold_1	Conpu1	gene	4070794	4071218	.	+	.	ID=TRINITY_DN12734_c0_g1_i1.path1;Name=TRINITY_DN12734_c0_g1_i1
scaffold_1	Conpu1	mRNA	4070794	4071218	.	+	.	ID=TRINITY_DN12734_c0_g1_i1.mrna1;Name=TRINITY_DN12734_c0_g1_i1;Parent=TRINITY_DN12734_c0_g1_i1.path1;coverage=100.0;identity=100.0;matches=425;mismatches=0;indels=0;unknowns=0
scaffold_1	Conpu1	CDS	4070796	4071218	100	+	0	ID=TRINITY_DN12734_c0_g1_i1.mrna1.cds1;Name=TRINITY_DN12734_c0_g1_i1;Parent=TRINITY_DN12734_c0_g1_i1.mrna1;Target=TRINITY_DN12734_c0_g1_i1 425 3 .
scaffold_1	Conpu1	exon	4071207	4071274	100	+	.	ID=TRINITY_DN15405_c0_g1_i1.mrna1.exon1;Name=TRINITY_DN15405_c0_g1_i1;Parent=TRINITY_DN15405_c0_g1_i1.mrna1;Target=TRINITY_DN15405_c0_g1_i1 1033 1100 -
scaffold_1	Conpu1	gene	4071207	4072410	.	+	.	ID=TRINITY_DN15405_c0_g1_i1.path1;Name=TRINITY_DN15405_c0_g1_i1
scaffold_1	Conpu1	mRNA	4071207	4072410	.	+	.	ID=TRINITY_DN15405_c0_g1_i1.mrna1;Name=TRINITY_DN15405_c0_g1_i1;Parent=TRINITY_DN15405_c0_g1_i1.path1;coverage=100.0;identity=100.0;matches=1100;mismatches=0;indels=0;unknowns=0
scaffold_1	Conpu1	exon	4071329	4072206	100	+	.	ID=TRINITY_DN15405_c0_g1_i1.mrna1.exon2;Name=TRINITY_DN15405_c0_g1_i1;Parent=TRINITY_DN15405_c0_g1_i1.mrna1;Target=TRINITY_DN15405_c0_g1_i1 155 1032 -
scaffold_1	Conpu1	CDS	4071881	4072206	100	+	0	ID=TRINITY_DN15405_c0_g1_i1.mrna1.cds1;Name=TRINITY_DN15405_c0_g1_i1;Parent=TRINITY_DN15405_c0_g1_i1.mrna1;Target=TRINITY_DN15405_c0_g1_i1 155 480 .
scaffold_1	Conpu1	CDS	4072257	4072371	100	+	2	ID=TRINITY_DN15405_c0_g1_i1.mrna1.cds2;Name=TRINITY_DN15405_c0_g1_i1;Parent=TRINITY_DN15405_c0_g1_i1.mrna1;Target=TRINITY_DN15405_c0_g1_i1 40 154 .
scaffold_1	Conpu1	exon	4072257	4072410	100	+	.	ID=TRINITY_DN15405_c0_g1_i1.mrna1.exon3;Name=TRINITY_DN15405_c0_g1_i1;Parent=TRINITY_DN15405_c0_g1_i1.mrna1;Target=TRINITY_DN15405_c0_g1_i1 1 154 -
scaffold_1	Conpu1	exon	4073766	4073966	100	-	.	ID=TRINITY_DN7115_c0_g1_i1.mrna1.exon2;Name=TRINITY_DN7115_c0_g1_i1;Parent=TRINITY_DN7115_c0_g1_i1.mrna1;Target=TRINITY_DN7115_c0_g1_i1 1 201 -
scaffold_1	Conpu1	gene	4073766	4074371	.	-	.	ID=TRINITY_DN7115_c0_g1_i1.path1;Name=TRINITY_DN7115_c0_g1_i1
scaffold_1	Conpu1	mRNA	4073766	4074371	.	-	.	ID=TRINITY_DN7115_c0_g1_i1.mrna1;Name=TRINITY_DN7115_c0_g1_i1;Parent=TRINITY_DN7115_c0_g1_i1.path1;coverage=100.0;identity=91.2;matches=499;mismatches=0;indels=48;unknowns=0
scaffold_1	Conpu1	CDS	4073963	4073966	100	-	2	ID=TRINITY_DN7115_c0_g1_i1.mrna1.cds2;Name=TRINITY_DN7115_c0_g1_i1;Parent=TRINITY_DN7115_c0_g1_i1.mrna1;Target=TRINITY_DN7115_c0_g1_i1 198 201 .
scaffold_1	Conpu1	CDS	4074026	4074282	81	-	0	ID=TRINITY_DN7115_c0_g1_i1.mrna1.cds1;Name=TRINITY_DN7115_c0_g1_i1;Parent=TRINITY_DN7115_c0_g1_i1.mrna1;Target=TRINITY_DN7115_c0_g1_i1 202 410 .
scaffold_1	Conpu1	exon	4074026	4074371	86	-	.	ID=TRINITY_DN7115_c0_g1_i1.mrna1.exon1;Name=TRINITY_DN7115_c0_g1_i1;Parent=TRINITY_DN7115_c0_g1_i1.mrna1;Target=TRINITY_DN7115_c0_g1_i1 202 499 -
scaffold_1	Conpu1	exon	4088332	4088436	100	-	.	ID=TRINITY_DN6501_c0_g1_i1.mrna1.exon2;Name=TRINITY_DN6501_c0_g1_i1;Parent=TRINITY_DN6501_c0_g1_i1.mrna1;Target=TRINITY_DN6501_c0_g1_i1 97 201 +
scaffold_1	Conpu1	gene	4088332	4088586	.	-	.	ID=TRINITY_DN6501_c0_g1_i1.path1;Name=TRINITY_DN6501_c0_g1_i1
scaffold_1	Conpu1	mRNA	4088332	4088586	.	-	.	ID=TRINITY_DN6501_c0_g1_i1.mrna1;Name=TRINITY_DN6501_c0_g1_i1;Parent=TRINITY_DN6501_c0_g1_i1.path1;coverage=100.0;identity=100.0;matches=201;mismatches=0;indels=0;unknowns=0
scaffold_1	Conpu1	CDS	4088362	4088436	100	-	0	ID=TRINITY_DN6501_c0_g1_i1.mrna1.cds2;Name=TRINITY_DN6501_c0_g1_i1;Parent=TRINITY_DN6501_c0_g1_i1.mrna1;Target=TRINITY_DN6501_c0_g1_i1 97 171 +
scaffold_1	Conpu1	CDS	4088491	4088586	100	-	0	ID=TRINITY_DN6501_c0_g1_i1.mrna1.cds1;Name=TRINITY_DN6501_c0_g1_i1;Parent=TRINITY_DN6501_c0_g1_i1.mrna1;Target=TRINITY_DN6501_c0_g1_i1 1 96 +
scaffold_1	Conpu1	exon	4088491	4088586	100	-	.	ID=TRINITY_DN6501_c0_g1_i1.mrna1.exon1;Name=TRINITY_DN6501_c0_g1_i1;Parent=TRINITY_DN6501_c0_g1_i1.mrna1;Target=TRINITY_DN6501_c0_g1_i1 1 96 +
scaffold_1	Conpu1	exon	4088571	4088684	99	-	.	ID=TRINITY_DN16487_c0_g1_i1.mrna1.exon2;Name=TRINITY_DN16487_c0_g1_i1;Parent=TRINITY_DN16487_c0_g1_i1.mrna1;Target=TRINITY_DN16487_c0_g1_i1 115 228 +
scaffold_1	Conpu1	gene	4088571	4088832	.	-	.	ID=TRINITY_DN16487_c0_g1_i1.path1;Name=TRINITY_DN16487_c0_g1_i1
scaffold_1	Conpu1	mRNA	4088571	4088832	.	-	.	ID=TRINITY_DN16487_c0_g1_i1.mrna1;Name=TRINITY_DN16487_c0_g1_i1;Parent=TRINITY_DN16487_c0_g1_i1.path1;coverage=94.3;identity=99.5;matches=214;mismatches=1;indels=0;unknowns=0
scaffold_1	Conpu1	CDS	4088572	4088684	99	-	1	ID=TRINITY_DN16487_c0_g1_i1.mrna1.cds2;Name=TRINITY_DN16487_c0_g1_i1;Parent=TRINITY_DN16487_c0_g1_i1.mrna1;Target=TRINITY_DN16487_c0_g1_i1 115 227 +
scaffold_1	Conpu1	CDS	4088732	4088738	100	-	0	ID=TRINITY_DN16487_c0_g1_i1.mrna1.cds1;Name=TRINITY_DN16487_c0_g1_i1;Parent=TRINITY_DN16487_c0_g1_i1.mrna1;Target=TRINITY_DN16487_c0_g1_i1 108 114 +
scaffold_1	Conpu1	exon	4088732	4088832	100	-	.	ID=TRINITY_DN16487_c0_g1_i1.mrna1.exon1;Name=TRINITY_DN16487_c0_g1_i1;Parent=TRINITY_DN16487_c0_g1_i1.mrna1;Target=TRINITY_DN16487_c0_g1_i1 14 114 +
scaffold_1	Conpu1	exon	4093849	4094273	100	-	.	ID=TRINITY_DN13726_c0_g1_i1.mrna1.exon1;Name=TRINITY_DN13726_c0_g1_i1;Parent=TRINITY_DN13726_c0_g1_i1.mrna1;Target=TRINITY_DN13726_c0_g1_i1 425 1 .
scaffold_1	Conpu1	gene	4093849	4094273	.	-	.	ID=TRINITY_DN13726_c0_g1_i1.path1;Name=TRINITY_DN13726_c0_g1_i1
scaffold_1	Conpu1	mRNA	4093849	4094273	.	-	.	ID=TRINITY_DN13726_c0_g1_i1.mrna1;Name=TRINITY_DN13726_c0_g1_i1;Parent=TRINITY_DN13726_c0_g1_i1.path1;coverage=100.0;identity=100.0;matches=425;mismatches=0;indels=0;unknowns=0
scaffold_1	Conpu1	CDS	4094114	4094272	100	-	0	ID=TRINITY_DN13726_c0_g1_i1.mrna1.cds1;Name=TRINITY_DN13726_c0_g1_i1;Parent=TRINITY_DN13726_c0_g1_i1.mrna1;Target=TRINITY_DN13726_c0_g1_i1 160 2 .
scaffold_1	Conpu1	exon	4149224	4149438	100	-	.	ID=TRINITY_DN13285_c0_g1_i1.mrna1.exon1;Name=TRINITY_DN13285_c0_g1_i1;Parent=TRINITY_DN13285_c0_g1_i1.mrna1;Target=TRINITY_DN13285_c0_g1_i1 215 1 .
scaffold_1	Conpu1	gene	4149224	4149438	.	-	.	ID=TRINITY_DN13285_c0_g1_i1.path1;Name=TRINITY_DN13285_c0_g1_i1
scaffold_1	Conpu1	mRNA	4149224	4149438	.	-	.	ID=TRINITY_DN13285_c0_g1_i1.mrna1;Name=TRINITY_DN13285_c0_g1_i1;Parent=TRINITY_DN13285_c0_g1_i1.path1;coverage=100.0;identity=100.0;matches=215;mismatches=0;indels=0;unknowns=0
scaffold_1	Conpu1	CDS	4149345	4149437	100	-	0	ID=TRINITY_DN13285_c0_g1_i1.mrna1.cds1;Name=TRINITY_DN13285_c0_g1_i1;Parent=TRINITY_DN13285_c0_g1_i1.mrna1;Target=TRINITY_DN13285_c0_g1_i1 94 2 .
scaffold_1	Conpu1	exon	4150047	4150777	100	-	.	ID=TRINITY_DN8621_c0_g1_i1.mrna1.exon1;Name=TRINITY_DN8621_c0_g1_i1;Parent=TRINITY_DN8621_c0_g1_i1.mrna1;Target=TRINITY_DN8621_c0_g1_i1 731 1 .
scaffold_1	Conpu1	gene	4150047	4150777	.	-	.	ID=TRINITY_DN8621_c0_g1_i1.path1;Name=TRINITY_DN8621_c0_g1_i1
scaffold_1	Conpu1	mRNA	4150047	4150777	.	-	.	ID=TRINITY_DN8621_c0_g1_i1.mrna1;Name=TRINITY_DN8621_c0_g1_i1;Parent=TRINITY_DN8621_c0_g1_i1.path1;coverage=100.0;identity=100.0;matches=731;mismatches=0;indels=0;unknowns=0
scaffold_1	Conpu1	CDS	4150462	4150659	100	-	0	ID=TRINITY_DN8621_c0_g1_i1.mrna1.cds1;Name=TRINITY_DN8621_c0_g1_i1;Parent=TRINITY_DN8621_c0_g1_i1.mrna1;Target=TRINITY_DN8621_c0_g1_i1 316 119 .
scaffold_1	Conpu1	CDS	4152681	4152956	100	+	0	ID=TRINITY_DN16229_c0_g1_i1.mrna1.cds1;Name=TRINITY_DN16229_c0_g1_i1;Parent=TRINITY_DN16229_c0_g1_i1.mrna1;Target=TRINITY_DN16229_c0_g1_i1 276 1 .
scaffold_1	Conpu1	exon	4152681	4152957	100	+	.	ID=TRINITY_DN16229_c0_g1_i1.mrna1.exon1;Name=TRINITY_DN16229_c0_g1_i1;Parent=TRINITY_DN16229_c0_g1_i1.mrna1;Target=TRINITY_DN16229_c0_g1_i1 277 1 .
scaffold_1	Conpu1	gene	4152681	4152957	.	+	.	ID=TRINITY_DN16229_c0_g1_i1.path1;Name=TRINITY_DN16229_c0_g1_i1
scaffold_1	Conpu1	mRNA	4152681	4152957	.	+	.	ID=TRINITY_DN16229_c0_g1_i1.mrna1;Name=TRINITY_DN16229_c0_g1_i1;Parent=TRINITY_DN16229_c0_g1_i1.path1;coverage=100.0;identity=100.0;matches=277;mismatches=0;indels=0;unknowns=0
scaffold_1	Conpu1	exon	4155644	4156117	100	+	.	ID=TRINITY_DN2132_c1_g1_i1.mrna1.exon1;Name=TRINITY_DN2132_c1_g1_i1;Parent=TRINITY_DN2132_c1_g1_i1.mrna1;Target=TRINITY_DN2132_c1_g1_i1 474 1 .
scaffold_1	Conpu1	gene	4155644	4156117	.	+	.	ID=TRINITY_DN2132_c1_g1_i1.path1;Name=TRINITY_DN2132_c1_g1_i1
scaffold_1	Conpu1	mRNA	4155644	4156117	.	+	.	ID=TRINITY_DN2132_c1_g1_i1.mrna1;Name=TRINITY_DN2132_c1_g1_i1;Parent=TRINITY_DN2132_c1_g1_i1.path1;coverage=100.0;identity=100.0;matches=474;mismatches=0;indels=0;unknowns=0
scaffold_1	Conpu1	CDS	4155769	4156116	100	+	0	ID=TRINITY_DN2132_c1_g1_i1.mrna1.cds1;Name=TRINITY_DN2132_c1_g1_i1;Parent=TRINITY_DN2132_c1_g1_i1.mrna1;Target=TRINITY_DN2132_c1_g1_i1 473 126 .
scaffold_1	Conpu1	exon	4156277	4156487	100	+	.	ID=TRINITY_DN13150_c0_g1_i1.mrna1.exon1;Name=TRINITY_DN13150_c0_g1_i1;Parent=TRINITY_DN13150_c0_g1_i1.mrna1;Target=TRINITY_DN13150_c0_g1_i1 270 480 -
scaffold_1	Conpu1	gene	4156277	4156868	.	+	.	ID=TRINITY_DN13150_c0_g1_i1.path1;Name=TRINITY_DN13150_c0_g1_i1
scaffold_1	Conpu1	mRNA	4156277	4156868	.	+	.	ID=TRINITY_DN13150_c0_g1_i1.mrna1;Name=TRINITY_DN13150_c0_g1_i1;Parent=TRINITY_DN13150_c0_g1_i1.path1;coverage=100.0;identity=100.0;matches=480;mismatches=0;indels=0;unknowns=0
scaffold_1	Conpu1	exon	4156545	4156687	100	+	.	ID=TRINITY_DN13150_c0_g1_i1.mrna1.exon2;Name=TRINITY_DN13150_c0_g1_i1;Parent=TRINITY_DN13150_c0_g1_i1.mrna1;Target=TRINITY_DN13150_c0_g1_i1 127 269 -
scaffold_1	Conpu1	CDS	4156630	4156687	100	+	0	ID=TRINITY_DN13150_c0_g1_i1.mrna1.cds1;Name=TRINITY_DN13150_c0_g1_i1;Parent=TRINITY_DN13150_c0_g1_i1.mrna1;Target=TRINITY_DN13150_c0_g1_i1 127 184 .
scaffold_1	Conpu1	CDS	4156743	4156831	100	+	1	ID=TRINITY_DN13150_c0_g1_i1.mrna1.cds2;Name=TRINITY_DN13150_c0_g1_i1;Parent=TRINITY_DN13150_c0_g1_i1.mrna1;Target=TRINITY_DN13150_c0_g1_i1 38 126 .
scaffold_1	Conpu1	exon	4156743	4156868	100	+	.	ID=TRINITY_DN13150_c0_g1_i1.mrna1.exon3;Name=TRINITY_DN13150_c0_g1_i1;Parent=TRINITY_DN13150_c0_g1_i1.mrna1;Target=TRINITY_DN13150_c0_g1_i1 1 126 -
scaffold_1	Conpu1	exon	4156852	4157068	100	-	.	ID=TRINITY_DN8400_c0_g1_i1.mrna1.exon1;Name=TRINITY_DN8400_c0_g1_i1;Parent=TRINITY_DN8400_c0_g1_i1.mrna1;Target=TRINITY_DN8400_c0_g1_i1 217 1 .
scaffold_1	Conpu1	gene	4156852	4157068	.	-	.	ID=TRINITY_DN8400_c0_g1_i1.path1;Name=TRINITY_DN8400_c0_g1_i1
scaffold_1	Conpu1	mRNA	4156852	4157068	.	-	.	ID=TRINITY_DN8400_c0_g1_i1.mrna1;Name=TRINITY_DN8400_c0_g1_i1;Parent=TRINITY_DN8400_c0_g1_i1.path1;coverage=100.0;identity=100.0;matches=217;mismatches=0;indels=0;unknowns=0
scaffold_1	Conpu1	CDS	4156923	4157015	100	-	0	ID=TRINITY_DN8400_c0_g1_i1.mrna1.cds1;Name=TRINITY_DN8400_c0_g1_i1;Parent=TRINITY_DN8400_c0_g1_i1.mrna1;Target=TRINITY_DN8400_c0_g1_i1 146 54 .
scaffold_1	Conpu1	exon	4277574	4277612	97	+	.	ID=TRINITY_DN9732_c0_g1_i1.mrna1.exon1;Name=TRINITY_DN9732_c0_g1_i1;Parent=TRINITY_DN9732_c0_g1_i1.mrna1;Target=TRINITY_DN9732_c0_g1_i1 325 363 -
scaffold_1	Conpu1	gene	4277574	4277992	.	+	.	ID=TRINITY_DN9732_c0_g1_i1.path1;Name=TRINITY_DN9732_c0_g1_i1
scaffold_1	Conpu1	mRNA	4277574	4277992	.	+	.	ID=TRINITY_DN9732_c0_g1_i1.mrna1;Name=TRINITY_DN9732_c0_g1_i1;Parent=TRINITY_DN9732_c0_g1_i1.path1;coverage=100.0;identity=99.7;matches=362;mismatches=1;indels=0;unknowns=0
scaffold_1	Conpu1	exon	4277669	4277992	100	+	.	ID=TRINITY_DN9732_c0_g1_i1.mrna1.exon2;Name=TRINITY_DN9732_c0_g1_i1;Parent=TRINITY_DN9732_c0_g1_i1.mrna1;Target=TRINITY_DN9732_c0_g1_i1 1 324 -
scaffold_1	Conpu1	CDS	4277775	4277918	100	+	0	ID=TRINITY_DN9732_c0_g1_i1.mrna1.cds1;Name=TRINITY_DN9732_c0_g1_i1;Parent=TRINITY_DN9732_c0_g1_i1.mrna1;Target=TRINITY_DN9732_c0_g1_i1 75 218 .
scaffold_1	Conpu1	exon	4315356	4315772	99	-	.	ID=TRINITY_DN12782_c0_g1_i1.mrna1.exon2;Name=TRINITY_DN12782_c0_g1_i1;Parent=TRINITY_DN12782_c0_g1_i1.mrna1;Target=TRINITY_DN12782_c0_g1_i1 91 507 +
scaffold_1	Conpu1	gene	4315356	4316046	.	-	.	ID=TRINITY_DN12782_c0_g1_i1.path1;Name=TRINITY_DN12782_c0_g1_i1
scaffold_1	Conpu1	mRNA	4315356	4316046	.	-	.	ID=TRINITY_DN12782_c0_g1_i1.mrna1;Name=TRINITY_DN12782_c0_g1_i1;Parent=TRINITY_DN12782_c0_g1_i1.path1;coverage=100.0;identity=99.8;matches=506;mismatches=1;indels=0;unknowns=0
scaffold_1	Conpu1	CDS	4315711	4315772	100	-	1	ID=TRINITY_DN12782_c0_g1_i1.mrna1.cds2;Name=TRINITY_DN12782_c0_g1_i1;Parent=TRINITY_DN12782_c0_g1_i1.mrna1;Target=TRINITY_DN12782_c0_g1_i1 91 152 +
scaffold_1	Conpu1	exon	4315741	4315981	100	-	.	ID=TRINITY_DN16560_c0_g1_i1.mrna1.exon1;Name=TRINITY_DN16560_c0_g1_i1;Parent=TRINITY_DN16560_c0_g1_i1.mrna1;Target=TRINITY_DN16560_c0_g1_i1 241 1 .
scaffold_1	Conpu1	gene	4315741	4315981	.	-	.	ID=TRINITY_DN16560_c0_g1_i1.path1;Name=TRINITY_DN16560_c0_g1_i1
scaffold_1	Conpu1	mRNA	4315741	4315981	.	-	.	ID=TRINITY_DN16560_c0_g1_i1.mrna1;Name=TRINITY_DN16560_c0_g1_i1;Parent=TRINITY_DN16560_c0_g1_i1.path1;coverage=100.0;identity=100.0;matches=241;mismatches=0;indels=0;unknowns=0
scaffold_1	Conpu1	CDS	4315834	4315980	100	-	0	ID=TRINITY_DN16560_c0_g1_i1.mrna1.cds1;Name=TRINITY_DN16560_c0_g1_i1;Parent=TRINITY_DN16560_c0_g1_i1.mrna1;Target=TRINITY_DN16560_c0_g1_i1 148 2 .
scaffold_1	Conpu1	CDS	4315957	4316044	100	-	0	ID=TRINITY_DN12782_c0_g1_i1.mrna1.cds1;Name=TRINITY_DN12782_c0_g1_i1;Parent=TRINITY_DN12782_c0_g1_i1.mrna1;Target=TRINITY_DN12782_c0_g1_i1 3 90 +
scaffold_1	Conpu1	exon	4315957	4316046	100	-	.	ID=TRINITY_DN12782_c0_g1_i1.mrna1.exon1;Name=TRINITY_DN12782_c0_g1_i1;Parent=TRINITY_DN12782_c0_g1_i1.mrna1;Target=TRINITY_DN12782_c0_g1_i1 1 90 +
scaffold_1	Conpu1	exon	4325485	4325911	99	-	.	ID=TRINITY_DN12874_c0_g1_i1.mrna1.exon2;Name=TRINITY_DN12874_c0_g1_i1;Parent=TRINITY_DN12874_c0_g1_i1.mrna1;Target=TRINITY_DN12874_c0_g1_i1 124 550 +
scaffold_1	Conpu1	gene	4325485	4326085	.	-	.	ID=TRINITY_DN12874_c0_g1_i1.path1;Name=TRINITY_DN12874_c0_g1_i1
scaffold_1	Conpu1	mRNA	4325485	4326085	.	-	.	ID=TRINITY_DN12874_c0_g1_i1.mrna1;Name=TRINITY_DN12874_c0_g1_i1;Parent=TRINITY_DN12874_c0_g1_i1.path1;coverage=100.0;identity=99.8;matches=549;mismatches=1;indels=0;unknowns=0
scaffold_1	Conpu1	CDS	4325805	4325897	100	-	0	ID=TRINITY_DN12874_c0_g1_i1.mrna1.cds1;Name=TRINITY_DN12874_c0_g1_i1;Parent=TRINITY_DN12874_c0_g1_i1.mrna1;Target=TRINITY_DN12874_c0_g1_i1 138 230 +
scaffold_1	Conpu1	exon	4325963	4326085	100	-	.	ID=TRINITY_DN12874_c0_g1_i1.mrna1.exon1;Name=TRINITY_DN12874_c0_g1_i1;Parent=TRINITY_DN12874_c0_g1_i1.mrna1;Target=TRINITY_DN12874_c0_g1_i1 1 123 +
scaffold_1	Conpu1	exon	4330048	4330351	100	-	.	ID=TRINITY_DN7244_c0_g1_i1.mrna1.exon2;Name=TRINITY_DN7244_c0_g1_i1;Parent=TRINITY_DN7244_c0_g1_i1.mrna1;Target=TRINITY_DN7244_c0_g1_i1 1 304 -
scaffold_1	Conpu1	gene	4330048	4330680	.	-	.	ID=TRINITY_DN7244_c0_g1_i1.path1;Name=TRINITY_DN7244_c0_g1_i1
scaffold_1	Conpu1	mRNA	4330048	4330680	.	-	.	ID=TRINITY_DN7244_c0_g1_i1.mrna1;Name=TRINITY_DN7244_c0_g1_i1;Parent=TRINITY_DN7244_c0_g1_i1.path1;coverage=100.0;identity=100.0;matches=561;mismatches=0;indels=0;unknowns=0
scaffold_1	Conpu1	CDS	4330269	4330351	100	-	1	ID=TRINITY_DN7244_c0_g1_i1.mrna1.cds2;Name=TRINITY_DN7244_c0_g1_i1;Parent=TRINITY_DN7244_c0_g1_i1.mrna1;Target=TRINITY_DN7244_c0_g1_i1 222 304 .
scaffold_1	Conpu1	CDS	4330424	4330487	100	-	0	ID=TRINITY_DN7244_c0_g1_i1.mrna1.cds1;Name=TRINITY_DN7244_c0_g1_i1;Parent=TRINITY_DN7244_c0_g1_i1.mrna1;Target=TRINITY_DN7244_c0_g1_i1 305 368 .
scaffold_1	Conpu1	exon	4330424	4330680	100	-	.	ID=TRINITY_DN7244_c0_g1_i1.mrna1.exon1;Name=TRINITY_DN7244_c0_g1_i1;Parent=TRINITY_DN7244_c0_g1_i1.mrna1;Target=TRINITY_DN7244_c0_g1_i1 305 561 -
scaffold_1	Conpu1	CDS	4331017	4331085	100	-	0	ID=TRINITY_DN7948_c0_g1_i1.mrna1.cds1;Name=TRINITY_DN7948_c0_g1_i1;Parent=TRINITY_DN7948_c0_g1_i1.mrna1;Target=TRINITY_DN7948_c0_g1_i1 1 69 .
scaffold_1	Conpu1	exon	4331017	4331281	100	-	.	ID=TRINITY_DN7948_c0_g1_i1.mrna1.exon2;Name=TRINITY_DN7948_c0_g1_i1;Parent=TRINITY_DN7948_c0_g1_i1.mrna1;Target=TRINITY_DN7948_c0_g1_i1 1 265 -
scaffold_1	Conpu1	gene	4331017	4331382	.	-	.	ID=TRINITY_DN7948_c0_g1_i1.path1;Name=TRINITY_DN7948_c0_g1_i1
scaffold_1	Conpu1	mRNA	4331017	4331382	.	-	.	ID=TRINITY_DN7948_c0_g1_i1.mrna1;Name=TRINITY_DN7948_c0_g1_i1;Parent=TRINITY_DN7948_c0_g1_i1.path1;coverage=100.0;identity=100.0;matches=303;mismatches=0;indels=0;unknowns=0
scaffold_1	Conpu1	exon	4331345	4331382	100	-	.	ID=TRINITY_DN7948_c0_g1_i1.mrna1.exon1;Name=TRINITY_DN7948_c0_g1_i1;Parent=TRINITY_DN7948_c0_g1_i1.mrna1;Target=TRINITY_DN7948_c0_g1_i1 266 303 -
scaffold_1	Conpu1	exon	4340966	4341118	100	-	.	ID=TRINITY_DN9819_c0_g1_i1.mrna1.exon3;Name=TRINITY_DN9819_c0_g1_i1;Parent=TRINITY_DN9819_c0_g1_i1.mrna1;Target=TRINITY_DN9819_c0_g1_i1 238 390 +
scaffold_1	Conpu1	gene	4340966	4341533	.	-	.	ID=TRINITY_DN9819_c0_g1_i1.path1;Name=TRINITY_DN9819_c0_g1_i1
scaffold_1	Conpu1	mRNA	4340966	4341533	.	-	.	ID=TRINITY_DN9819_c0_g1_i1.mrna1;Name=TRINITY_DN9819_c0_g1_i1;Parent=TRINITY_DN9819_c0_g1_i1.path1;coverage=100.0;identity=100.0;matches=390;mismatches=0;indels=0;unknowns=0
scaffold_1	Conpu1	CDS	4341025	4341118	100	-	2	ID=TRINITY_DN9819_c0_g1_i1.mrna1.cds2;Name=TRINITY_DN9819_c0_g1_i1;Parent=TRINITY_DN9819_c0_g1_i1.mrna1;Target=TRINITY_DN9819_c0_g1_i1 238 331 +
scaffold_1	Conpu1	CDS	4341242	4341264	100	-	0	ID=TRINITY_DN9819_c0_g1_i1.mrna1.cds1;Name=TRINITY_DN9819_c0_g1_i1;Parent=TRINITY_DN9819_c0_g1_i1.mrna1;Target=TRINITY_DN9819_c0_g1_i1 215 237 +
scaffold_1	Conpu1	exon	4341242	4341300	100	-	.	ID=TRINITY_DN9819_c0_g1_i1.mrna1.exon2;Name=TRINITY_DN9819_c0_g1_i1;Parent=TRINITY_DN9819_c0_g1_i1.mrna1;Target=TRINITY_DN9819_c0_g1_i1 179 237 +
scaffold_1	Conpu1	exon	4341356	4341533	100	-	.	ID=TRINITY_DN9819_c0_g1_i1.mrna1.exon1;Name=TRINITY_DN9819_c0_g1_i1;Parent=TRINITY_DN9819_c0_g1_i1.mrna1;Target=TRINITY_DN9819_c0_g1_i1 1 178 +
scaffold_1	Conpu1	exon	4341731	4341978	100	-	.	ID=TRINITY_DN5596_c0_g1_i1.mrna1.exon1;Name=TRINITY_DN5596_c0_g1_i1;Parent=TRINITY_DN5596_c0_g1_i1.mrna1;Target=TRINITY_DN5596_c0_g1_i1 248 1 .
scaffold_1	Conpu1	gene	4341731	4341978	.	-	.	ID=TRINITY_DN5596_c0_g1_i1.path1;Name=TRINITY_DN5596_c0_g1_i1
scaffold_1	Conpu1	mRNA	4341731	4341978	.	-	.	ID=TRINITY_DN5596_c0_g1_i1.mrna1;Name=TRINITY_DN5596_c0_g1_i1;Parent=TRINITY_DN5596_c0_g1_i1.path1;coverage=100.0;identity=100.0;matches=248;mismatches=0;indels=0;unknowns=0
scaffold_1	Conpu1	CDS	4341733	4341978	100	-	0	ID=TRINITY_DN5596_c0_g1_i1.mrna1.cds1;Name=TRINITY_DN5596_c0_g1_i1;Parent=TRINITY_DN5596_c0_g1_i1.mrna1;Target=TRINITY_DN5596_c0_g1_i1 246 1 .
scaffold_1	Conpu1	exon	4342106	4342327	100	-	.	ID=TRINITY_DN5896_c0_g1_i1.mrna1.exon1;Name=TRINITY_DN5896_c0_g1_i1;Parent=TRINITY_DN5896_c0_g1_i1.mrna1;Target=TRINITY_DN5896_c0_g1_i1 222 1 .
scaffold_1	Conpu1	gene	4342106	4342327	.	-	.	ID=TRINITY_DN5896_c0_g1_i1.path1;Name=TRINITY_DN5896_c0_g1_i1
scaffold_1	Conpu1	mRNA	4342106	4342327	.	-	.	ID=TRINITY_DN5896_c0_g1_i1.mrna1;Name=TRINITY_DN5896_c0_g1_i1;Parent=TRINITY_DN5896_c0_g1_i1.path1;coverage=100.0;identity=100.0;matches=222;mismatches=0;indels=0;unknowns=0
scaffold_1	Conpu1	CDS	4342178	4342327	100	-	0	ID=TRINITY_DN5896_c0_g1_i1.mrna1.cds1;Name=TRINITY_DN5896_c0_g1_i1;Parent=TRINITY_DN5896_c0_g1_i1.mrna1;Target=TRINITY_DN5896_c0_g1_i1 150 1 .
scaffold_1	Conpu1	CDS	4356977	4357150	100	+	0	ID=TRINITY_DN4317_c0_g1_i1.mrna1.cds1;Name=TRINITY_DN4317_c0_g1_i1;Parent=TRINITY_DN4317_c0_g1_i1.mrna1;Target=TRINITY_DN4317_c0_g1_i1 174 1 .
scaffold_1	Conpu1	exon	4356977	4357267	100	+	.	ID=TRINITY_DN4317_c0_g1_i1.mrna1.exon1;Name=TRINITY_DN4317_c0_g1_i1;Parent=TRINITY_DN4317_c0_g1_i1.mrna1;Target=TRINITY_DN4317_c0_g1_i1 291 1 .
scaffold_1	Conpu1	gene	4356977	4357267	.	+	.	ID=TRINITY_DN4317_c0_g1_i1.path1;Name=TRINITY_DN4317_c0_g1_i1
scaffold_1	Conpu1	mRNA	4356977	4357267	.	+	.	ID=TRINITY_DN4317_c0_g1_i1.mrna1;Name=TRINITY_DN4317_c0_g1_i1;Parent=TRINITY_DN4317_c0_g1_i1.path1;coverage=99.7;identity=100.0;matches=291;mismatches=0;indels=0;unknowns=0
scaffold_1	Conpu1	exon	4359963	4360072	100	-	.	ID=TRINITY_DN6432_c0_g1_i1.mrna1.exon2;Name=TRINITY_DN6432_c0_g1_i1;Parent=TRINITY_DN6432_c0_g1_i1.mrna1;Target=TRINITY_DN6432_c0_g1_i1 1 110 -
scaffold_1	Conpu1	gene	4359963	4360264	.	-	.	ID=TRINITY_DN6432_c0_g1_i1.path1;Name=TRINITY_DN6432_c0_g1_i1
scaffold_1	Conpu1	mRNA	4359963	4360264	.	-	.	ID=TRINITY_DN6432_c0_g1_i1.mrna1;Name=TRINITY_DN6432_c0_g1_i1;Parent=TRINITY_DN6432_c0_g1_i1.path1;coverage=100.0;identity=100.0;matches=227;mismatches=0;indels=0;unknowns=0
scaffold_1	Conpu1	CDS	4360057	4360072	100	-	2	ID=TRINITY_DN6432_c0_g1_i1.mrna1.cds2;Name=TRINITY_DN6432_c0_g1_i1;Parent=TRINITY_DN6432_c0_g1_i1.mrna1;Target=TRINITY_DN6432_c0_g1_i1 95 110 .
scaffold_1	Conpu1	CDS	4360148	4360263	100	-	0	ID=TRINITY_DN6432_c0_g1_i1.mrna1.cds1;Name=TRINITY_DN6432_c0_g1_i1;Parent=TRINITY_DN6432_c0_g1_i1.mrna1;Target=TRINITY_DN6432_c0_g1_i1 111 226 .
scaffold_1	Conpu1	exon	4360148	4360264	100	-	.	ID=TRINITY_DN6432_c0_g1_i1.mrna1.exon1;Name=TRINITY_DN6432_c0_g1_i1;Parent=TRINITY_DN6432_c0_g1_i1.mrna1;Target=TRINITY_DN6432_c0_g1_i1 111 227 -
scaffold_1	Conpu1	exon	4365985	4366245	100	-	.	ID=TRINITY_DN7419_c0_g1_i1.mrna1.exon1;Name=TRINITY_DN7419_c0_g1_i1;Parent=TRINITY_DN7419_c0_g1_i1.mrna1;Target=TRINITY_DN7419_c0_g1_i1 261 1 .
scaffold_1	Conpu1	gene	4365985	4366245	.	-	.	ID=TRINITY_DN7419_c0_g1_i1.path1;Name=TRINITY_DN7419_c0_g1_i1
scaffold_1	Conpu1	mRNA	4365985	4366245	.	-	.	ID=TRINITY_DN7419_c0_g1_i1.mrna1;Name=TRINITY_DN7419_c0_g1_i1;Parent=TRINITY_DN7419_c0_g1_i1.path1;coverage=100.0;identity=100.0;matches=261;mismatches=0;indels=0;unknowns=0
scaffold_1	Conpu1	CDS	4365987	4366244	100	-	0	ID=TRINITY_DN7419_c0_g1_i1.mrna1.cds1;Name=TRINITY_DN7419_c0_g1_i1;Parent=TRINITY_DN7419_c0_g1_i1.mrna1;Target=TRINITY_DN7419_c0_g1_i1 259 2 .
scaffold_1	Conpu1	exon	4407589	4407876	100	+	.	ID=TRINITY_DN15064_c0_g1_i1.mrna1.exon1;Name=TRINITY_DN15064_c0_g1_i1;Parent=TRINITY_DN15064_c0_g1_i1.mrna1;Target=TRINITY_DN15064_c0_g1_i1 1 288 +
scaffold_1	Conpu1	gene	4407589	4408371	.	+	.	ID=TRINITY_DN15064_c0_g1_i1.path1;Name=TRINITY_DN15064_c0_g1_i1
scaffold_1	Conpu1	mRNA	4407589	4408371	.	+	.	ID=TRINITY_DN15064_c0_g1_i1.mrna1;Name=TRINITY_DN15064_c0_g1_i1;Parent=TRINITY_DN15064_c0_g1_i1.path1;coverage=100.0;identity=100.0;matches=628;mismatches=0;indels=0;unknowns=0
scaffold_1	Conpu1	CDS	4407707	4407853	100	+	0	ID=TRINITY_DN15064_c0_g1_i1.mrna1.cds1;Name=TRINITY_DN15064_c0_g1_i1;Parent=TRINITY_DN15064_c0_g1_i1.mrna1;Target=TRINITY_DN15064_c0_g1_i1 119 265 +
scaffold_1	Conpu1	exon	4407933	4408121	100	+	.	ID=TRINITY_DN15064_c0_g1_i1.mrna1.exon2;Name=TRINITY_DN15064_c0_g1_i1;Parent=TRINITY_DN15064_c0_g1_i1.mrna1;Target=TRINITY_DN15064_c0_g1_i1 289 477 +
scaffold_1	Conpu1	exon	4408221	4408371	100	+	.	ID=TRINITY_DN15064_c0_g1_i1.mrna1.exon3;Name=TRINITY_DN15064_c0_g1_i1;Parent=TRINITY_DN15064_c0_g1_i1.mrna1;Target=TRINITY_DN15064_c0_g1_i1 478 628 +
scaffold_1	Conpu1	exon	4409441	4409795	100	-	.	ID=TRINITY_DN12500_c0_g1_i1.mrna1.exon2;Name=TRINITY_DN12500_c0_g1_i1;Parent=TRINITY_DN12500_c0_g1_i1.mrna1;Target=TRINITY_DN12500_c0_g1_i1 22 376 +
scaffold_1	Conpu1	gene	4409441	4409888	.	-	.	ID=TRINITY_DN12500_c0_g1_i1.path1;Name=TRINITY_DN12500_c0_g1_i1
scaffold_1	Conpu1	mRNA	4409441	4409888	.	-	.	ID=TRINITY_DN12500_c0_g1_i1.mrna1;Name=TRINITY_DN12500_c0_g1_i1;Parent=TRINITY_DN12500_c0_g1_i1.path1;coverage=100.0;identity=100.0;matches=376;mismatches=0;indels=0;unknowns=0
scaffold_1	Conpu1	CDS	4409442	4409555	100	-	0	ID=TRINITY_DN12500_c0_g1_i1.mrna1.cds1;Name=TRINITY_DN12500_c0_g1_i1;Parent=TRINITY_DN12500_c0_g1_i1.mrna1;Target=TRINITY_DN12500_c0_g1_i1 262 375 +
scaffold_1	Conpu1	exon	4409868	4409888	100	-	.	ID=TRINITY_DN12500_c0_g1_i1.mrna1.exon1;Name=TRINITY_DN12500_c0_g1_i1;Parent=TRINITY_DN12500_c0_g1_i1.mrna1;Target=TRINITY_DN12500_c0_g1_i1 1 21 +
scaffold_1	Conpu1	exon	4411424	4411755	100	+	.	ID=TRINITY_DN5158_c0_g1_i1.mrna1.exon1;Name=TRINITY_DN5158_c0_g1_i1;Parent=TRINITY_DN5158_c0_g1_i1.mrna1;Target=TRINITY_DN5158_c0_g1_i1 332 1 .
scaffold_1	Conpu1	gene	4411424	4411755	.	+	.	ID=TRINITY_DN5158_c0_g1_i1.path1;Name=TRINITY_DN5158_c0_g1_i1
scaffold_1	Conpu1	mRNA	4411424	4411755	.	+	.	ID=TRINITY_DN5158_c0_g1_i1.mrna1;Name=TRINITY_DN5158_c0_g1_i1;Parent=TRINITY_DN5158_c0_g1_i1.path1;coverage=100.0;identity=100.0;matches=332;mismatches=0;indels=0;unknowns=0
scaffold_1	Conpu1	CDS	4411667	4411753	100	+	0	ID=TRINITY_DN5158_c0_g1_i1.mrna1.cds1;Name=TRINITY_DN5158_c0_g1_i1;Parent=TRINITY_DN5158_c0_g1_i1.mrna1;Target=TRINITY_DN5158_c0_g1_i1 330 244 .
scaffold_1	Conpu1	exon	4412038	4412391	100	+	.	ID=TRINITY_DN15894_c0_g1_i1.mrna1.exon1;Name=TRINITY_DN15894_c0_g1_i1;Parent=TRINITY_DN15894_c0_g1_i1.mrna1;Target=TRINITY_DN15894_c0_g1_i1 354 1 .
scaffold_1	Conpu1	gene	4412038	4412391	.	+	.	ID=TRINITY_DN15894_c0_g1_i1.path1;Name=TRINITY_DN15894_c0_g1_i1
scaffold_1	Conpu1	mRNA	4412038	4412391	.	+	.	ID=TRINITY_DN15894_c0_g1_i1.mrna1;Name=TRINITY_DN15894_c0_g1_i1;Parent=TRINITY_DN15894_c0_g1_i1.path1;coverage=100.0;identity=100.0;matches=354;mismatches=0;indels=0;unknowns=0
scaffold_1	Conpu1	CDS	4412147	4412302	100	+	0	ID=TRINITY_DN15894_c0_g1_i1.mrna1.cds1;Name=TRINITY_DN15894_c0_g1_i1;Parent=TRINITY_DN15894_c0_g1_i1.mrna1;Target=TRINITY_DN15894_c0_g1_i1 265 110 .
scaffold_1	Conpu1	exon	4413522	4413761	100	-	.	ID=TRINITY_DN9897_c0_g1_i1.mrna1.exon1;Name=TRINITY_DN9897_c0_g1_i1;Parent=TRINITY_DN9897_c0_g1_i1.mrna1;Target=TRINITY_DN9897_c0_g1_i1 240 1 .
scaffold_1	Conpu1	gene	4413522	4413761	.	-	.	ID=TRINITY_DN9897_c0_g1_i1.path1;Name=TRINITY_DN9897_c0_g1_i1
scaffold_1	Conpu1	mRNA	4413522	4413761	.	-	.	ID=TRINITY_DN9897_c0_g1_i1.mrna1;Name=TRINITY_DN9897_c0_g1_i1;Parent=TRINITY_DN9897_c0_g1_i1.path1;coverage=100.0;identity=100.0;matches=240;mismatches=0;indels=0;unknowns=0
scaffold_1	Conpu1	CDS	4413658	4413759	100	-	0	ID=TRINITY_DN9897_c0_g1_i1.mrna1.cds1;Name=TRINITY_DN9897_c0_g1_i1;Parent=TRINITY_DN9897_c0_g1_i1.mrna1;Target=TRINITY_DN9897_c0_g1_i1 104 3 .
scaffold_1	Conpu1	exon	4443042	4443291	100	+	.	ID=TRINITY_DN9089_c0_g1_i1.mrna1.exon1;Name=TRINITY_DN9089_c0_g1_i1;Parent=TRINITY_DN9089_c0_g1_i1.mrna1;Target=TRINITY_DN9089_c0_g1_i1 250 1 .
scaffold_1	Conpu1	gene	4443042	4443291	.	+	.	ID=TRINITY_DN9089_c0_g1_i1.path1;Name=TRINITY_DN9089_c0_g1_i1
scaffold_1	Conpu1	mRNA	4443042	4443291	.	+	.	ID=TRINITY_DN9089_c0_g1_i1.mrna1;Name=TRINITY_DN9089_c0_g1_i1;Parent=TRINITY_DN9089_c0_g1_i1.path1;coverage=100.0;identity=100.0;matches=250;mismatches=0;indels=0;unknowns=0
scaffold_1	Conpu1	CDS	4443143	4443265	100	+	0	ID=TRINITY_DN9089_c0_g1_i1.mrna1.cds1;Name=TRINITY_DN9089_c0_g1_i1;Parent=TRINITY_DN9089_c0_g1_i1.mrna1;Target=TRINITY_DN9089_c0_g1_i1 224 102 .
scaffold_1	Conpu1	exon	4483405	4483624	100	-	.	ID=TRINITY_DN16438_c0_g1_i1.mrna1.exon1;Name=TRINITY_DN16438_c0_g1_i1;Parent=TRINITY_DN16438_c0_g1_i1.mrna1;Target=TRINITY_DN16438_c0_g1_i1 220 1 .
scaffold_1	Conpu1	gene	4483405	4483624	.	-	.	ID=TRINITY_DN16438_c0_g1_i1.path1;Name=TRINITY_DN16438_c0_g1_i1
scaffold_1	Conpu1	mRNA	4483405	4483624	.	-	.	ID=TRINITY_DN16438_c0_g1_i1.mrna1;Name=TRINITY_DN16438_c0_g1_i1;Parent=TRINITY_DN16438_c0_g1_i1.path1;coverage=100.0;identity=100.0;matches=220;mismatches=0;indels=0;unknowns=0
scaffold_1	Conpu1	CDS	4483535	4483624	100	-	0	ID=TRINITY_DN16438_c0_g1_i1.mrna1.cds1;Name=TRINITY_DN16438_c0_g1_i1;Parent=TRINITY_DN16438_c0_g1_i1.mrna1;Target=TRINITY_DN16438_c0_g1_i1 90 1 .
scaffold_1	Conpu1	exon	4516632	4517011	100	+	.	ID=TRINITY_DN15962_c0_g1_i1.mrna1.exon1;Name=TRINITY_DN15962_c0_g1_i1;Parent=TRINITY_DN15962_c0_g1_i1.mrna1;Target=TRINITY_DN15962_c0_g1_i1 380 1 .
scaffold_1	Conpu1	gene	4516632	4517011	.	+	.	ID=TRINITY_DN15962_c0_g1_i1.path1;Name=TRINITY_DN15962_c0_g1_i1
scaffold_1	Conpu1	mRNA	4516632	4517011	.	+	.	ID=TRINITY_DN15962_c0_g1_i1.mrna1;Name=TRINITY_DN15962_c0_g1_i1;Parent=TRINITY_DN15962_c0_g1_i1.path1;coverage=100.0;identity=100.0;matches=380;mismatches=0;indels=0;unknowns=0
scaffold_1	Conpu1	CDS	4516633	4516800	100	+	0	ID=TRINITY_DN15962_c0_g1_i1.mrna1.cds1;Name=TRINITY_DN15962_c0_g1_i1;Parent=TRINITY_DN15962_c0_g1_i1.mrna1;Target=TRINITY_DN15962_c0_g1_i1 169 2 .
scaffold_10	Conpu1	exon	16140	16379	100	-	.	ID=TRINITY_DN9799_c0_g1_i1.mrna1.exon2;Name=TRINITY_DN9799_c0_g1_i1;Parent=TRINITY_DN9799_c0_g1_i1.mrna1;Target=TRINITY_DN9799_c0_g1_i1 1 240 -
scaffold_10	Conpu1	gene	16140	16513	.	-	.	ID=TRINITY_DN9799_c0_g1_i1.path1;Name=TRINITY_DN9799_c0_g1_i1
scaffold_10	Conpu1	mRNA	16140	16513	.	-	.	ID=TRINITY_DN9799_c0_g1_i1.mrna1;Name=TRINITY_DN9799_c0_g1_i1;Parent=TRINITY_DN9799_c0_g1_i1.path1;coverage=96.7;identity=100.0;matches=292;mismatches=0;indels=0;unknowns=0
scaffold_10	Conpu1	CDS	16266	16379	100	-	0	ID=TRINITY_DN9799_c0_g1_i1.mrna1.cds2;Name=TRINITY_DN9799_c0_g1_i1;Parent=TRINITY_DN9799_c0_g1_i1.mrna1;Target=TRINITY_DN9799_c0_g1_i1 127 240 .
scaffold_10	Conpu1	CDS	16462	16512	100	-	0	ID=TRINITY_DN9799_c0_g1_i1.mrna1.cds1;Name=TRINITY_DN9799_c0_g1_i1;Parent=TRINITY_DN9799_c0_g1_i1.mrna1;Target=TRINITY_DN9799_c0_g1_i1 241 291 .
scaffold_10	Conpu1	exon	16462	16513	100	-	.	ID=TRINITY_DN9799_c0_g1_i1.mrna1.exon1;Name=TRINITY_DN9799_c0_g1_i1;Parent=TRINITY_DN9799_c0_g1_i1.mrna1;Target=TRINITY_DN9799_c0_g1_i1 241 292 -
scaffold_10	Conpu1	exon	21285	21480	100	-	.	ID=TRINITY_DN8907_c0_g1_i1.mrna1.exon2;Name=TRINITY_DN8907_c0_g1_i1;Parent=TRINITY_DN8907_c0_g1_i1.mrna1;Target=TRINITY_DN8907_c0_g1_i1 234 39 .
scaffold_10	Conpu1	gene	21285	21566	.	-	.	ID=TRINITY_DN8907_c0_g1_i1.path1;Name=TRINITY_DN8907_c0_g1_i1
scaffold_10	Conpu1	mRNA	21285	21566	.	-	.	ID=TRINITY_DN8907_c0_g1_i1.mrna1;Name=TRINITY_DN8907_c0_g1_i1;Parent=TRINITY_DN8907_c0_g1_i1.path1;coverage=100.0;identity=100.0;matches=234;mismatches=0;indels=0;unknowns=0
scaffold_10	Conpu1	CDS	21304	21438	100	-	0	ID=TRINITY_DN8907_c0_g1_i1.mrna1.cds1;Name=TRINITY_DN8907_c0_g1_i1;Parent=TRINITY_DN8907_c0_g1_i1.mrna1;Target=TRINITY_DN8907_c0_g1_i1 215 81 .
scaffold_10	Conpu1	exon	21529	21566	100	-	.	ID=TRINITY_DN8907_c0_g1_i1.mrna1.exon1;Name=TRINITY_DN8907_c0_g1_i1;Parent=TRINITY_DN8907_c0_g1_i1.mrna1;Target=TRINITY_DN8907_c0_g1_i1 38 1 .
scaffold_10	Conpu1	exon	26960	27182	100	+	.	ID=TRINITY_DN5501_c0_g1_i1.mrna1.exon1;Name=TRINITY_DN5501_c0_g1_i1;Parent=TRINITY_DN5501_c0_g1_i1.mrna1;Target=TRINITY_DN5501_c0_g1_i1 223 1 .
scaffold_10	Conpu1	gene	26960	27182	.	+	.	ID=TRINITY_DN5501_c0_g1_i1.path1;Name=TRINITY_DN5501_c0_g1_i1
scaffold_10	Conpu1	mRNA	26960	27182	.	+	.	ID=TRINITY_DN5501_c0_g1_i1.mrna1;Name=TRINITY_DN5501_c0_g1_i1;Parent=TRINITY_DN5501_c0_g1_i1.path1;coverage=100.0;identity=100.0;matches=223;mismatches=0;indels=0;unknowns=0
scaffold_10	Conpu1	CDS	26961	27110	100	+	0	ID=TRINITY_DN5501_c0_g1_i1.mrna1.cds1;Name=TRINITY_DN5501_c0_g1_i1;Parent=TRINITY_DN5501_c0_g1_i1.mrna1;Target=TRINITY_DN5501_c0_g1_i1 151 2 .
scaffold_10	Conpu1	exon	27293	27821	100	-	.	ID=TRINITY_DN11968_c0_g1_i1.mrna1.exon1;Name=TRINITY_DN11968_c0_g1_i1;Parent=TRINITY_DN11968_c0_g1_i1.mrna1;Target=TRINITY_DN11968_c0_g1_i1 530 2 .
scaffold_10	Conpu1	gene	27293	27821	.	-	.	ID=TRINITY_DN11968_c0_g1_i1.path1;Name=TRINITY_DN11968_c0_g1_i1
scaffold_10	Conpu1	mRNA	27293	27821	.	-	.	ID=TRINITY_DN11968_c0_g1_i1.mrna1;Name=TRINITY_DN11968_c0_g1_i1;Parent=TRINITY_DN11968_c0_g1_i1.path1;coverage=99.8;identity=100.0;matches=529;mismatches=0;indels=0;unknowns=0
scaffold_10	Conpu1	CDS	27446	27631	100	-	0	ID=TRINITY_DN11968_c0_g1_i1.mrna1.cds1;Name=TRINITY_DN11968_c0_g1_i1;Parent=TRINITY_DN11968_c0_g1_i1.mrna1;Target=TRINITY_DN11968_c0_g1_i1 377 192 .
scaffold_10	Conpu1	exon	48076	48451	100	+	.	ID=TRINITY_DN12165_c0_g1_i1.mrna1.exon1;Name=TRINITY_DN12165_c0_g1_i1;Parent=TRINITY_DN12165_c0_g1_i1.mrna1;Target=TRINITY_DN12165_c0_g1_i1 1 376 +
scaffold_10	Conpu1	gene	48076	48609	.	+	.	ID=TRINITY_DN12165_c0_g1_i1.path1;Name=TRINITY_DN12165_c0_g1_i1
scaffold_10	Conpu1	mRNA	48076	48609	.	+	.	ID=TRINITY_DN12165_c0_g1_i1.mrna1;Name=TRINITY_DN12165_c0_g1_i1;Parent=TRINITY_DN12165_c0_g1_i1.path1;coverage=100.0;identity=100.0;matches=454;mismatches=0;indels=0;unknowns=0
scaffold_10	Conpu1	CDS	48220	48405	100	+	0	ID=TRINITY_DN12165_c0_g1_i1.mrna1.cds1;Name=TRINITY_DN12165_c0_g1_i1;Parent=TRINITY_DN12165_c0_g1_i1.mrna1;Target=TRINITY_DN12165_c0_g1_i1 145 330 +
scaffold_10	Conpu1	exon	48532	48609	100	+	.	ID=TRINITY_DN12165_c0_g1_i1.mrna1.exon2;Name=TRINITY_DN12165_c0_g1_i1;Parent=TRINITY_DN12165_c0_g1_i1.mrna1;Target=TRINITY_DN12165_c0_g1_i1 377 454 +
scaffold_10	Conpu1	exon	57875	57984	100	-	.	ID=TRINITY_DN16046_c0_g1_i1.mrna1.exon2;Name=TRINITY_DN16046_c0_g1_i1;Parent=TRINITY_DN16046_c0_g1_i1.mrna1;Target=TRINITY_DN16046_c0_g1_i1 337 228 .
scaffold_10	Conpu1	gene	57875	58284	.	-	.	ID=TRINITY_DN16046_c0_g1_i1.path1;Name=TRINITY_DN16046_c0_g1_i1
scaffold_10	Conpu1	mRNA	57875	58284	.	-	.	ID=TRINITY_DN16046_c0_g1_i1.mrna1;Name=TRINITY_DN16046_c0_g1_i1;Parent=TRINITY_DN16046_c0_g1_i1.path1;coverage=100.0;identity=99.1;matches=334;mismatches=3;indels=0;unknowns=0
scaffold_10	Conpu1	exon	58058	58284	98	-	.	ID=TRINITY_DN16046_c0_g1_i1.mrna1.exon1;Name=TRINITY_DN16046_c0_g1_i1;Parent=TRINITY_DN16046_c0_g1_i1.mrna1;Target=TRINITY_DN16046_c0_g1_i1 227 1 .
scaffold_10	Conpu1	CDS	58147	58284	100	-	0	ID=TRINITY_DN16046_c0_g1_i1.mrna1.cds1;Name=TRINITY_DN16046_c0_g1_i1;Parent=TRINITY_DN16046_c0_g1_i1.mrna1;Target=TRINITY_DN16046_c0_g1_i1 138 1 .
scaffold_10	Conpu1	exon	95600	95706	100	+	.	ID=TRINITY_DN8779_c0_g1_i1.mrna1.exon1;Name=TRINITY_DN8779_c0_g1_i1;Parent=TRINITY_DN8779_c0_g1_i1.mrna1;Target=TRINITY_DN8779_c0_g1_i1 387 493 -
scaffold_10	Conpu1	gene	95600	96276	.	+	.	ID=TRINITY_DN8779_c0_g1_i1.path1;Name=TRINITY_DN8779_c0_g1_i1
scaffold_10	Conpu1	mRNA	95600	96276	.	+	.	ID=TRINITY_DN8779_c0_g1_i1.mrna1;Name=TRINITY_DN8779_c0_g1_i1;Parent=TRINITY_DN8779_c0_g1_i1.path1;coverage=100.0;identity=100.0;matches=493;mismatches=0;indels=0;unknowns=0
scaffold_10	Conpu1	CDS	95602	95706	100	+	0	ID=TRINITY_DN8779_c0_g1_i1.mrna1.cds1;Name=TRINITY_DN8779_c0_g1_i1;Parent=TRINITY_DN8779_c0_g1_i1.mrna1;Target=TRINITY_DN8779_c0_g1_i1 387 491 .
scaffold_10	Conpu1	CDS	95764	95851	100	+	0	ID=TRINITY_DN8779_c0_g1_i1.mrna1.cds2;Name=TRINITY_DN8779_c0_g1_i1;Parent=TRINITY_DN8779_c0_g1_i1.mrna1;Target=TRINITY_DN8779_c0_g1_i1 299 386 .
scaffold_10	Conpu1	exon	95764	95851	100	+	.	ID=TRINITY_DN8779_c0_g1_i1.mrna1.exon2;Name=TRINITY_DN8779_c0_g1_i1;Parent=TRINITY_DN8779_c0_g1_i1.mrna1;Target=TRINITY_DN8779_c0_g1_i1 299 386 -
scaffold_10	Conpu1	CDS	95907	96008	100	+	1	ID=TRINITY_DN8779_c0_g1_i1.mrna1.cds3;Name=TRINITY_DN8779_c0_g1_i1;Parent=TRINITY_DN8779_c0_g1_i1.mrna1;Target=TRINITY_DN8779_c0_g1_i1 197 298 .
scaffold_10	Conpu1	exon	95907	96008	100	+	.	ID=TRINITY_DN8779_c0_g1_i1.mrna1.exon3;Name=TRINITY_DN8779_c0_g1_i1;Parent=TRINITY_DN8779_c0_g1_i1.mrna1;Target=TRINITY_DN8779_c0_g1_i1 197 298 -
scaffold_10	Conpu1	CDS	96081	96094	100	+	1	ID=TRINITY_DN8779_c0_g1_i1.mrna1.cds4;Name=TRINITY_DN8779_c0_g1_i1;Parent=TRINITY_DN8779_c0_g1_i1.mrna1;Target=TRINITY_DN8779_c0_g1_i1 183 196 .
scaffold_10	Conpu1	exon	96081	96276	100	+	.	ID=TRINITY_DN8779_c0_g1_i1.mrna1.exon4;Name=TRINITY_DN8779_c0_g1_i1;Parent=TRINITY_DN8779_c0_g1_i1.mrna1;Target=TRINITY_DN8779_c0_g1_i1 1 196 -
scaffold_10	Conpu1	exon	107677	107945	99	+	.	ID=TRINITY_DN16112_c0_g1_i1.mrna1.exon1;Name=TRINITY_DN16112_c0_g1_i1;Parent=TRINITY_DN16112_c0_g1_i1.mrna1;Target=TRINITY_DN16112_c0_g1_i1 269 1 .
scaffold_10	Conpu1	gene	107677	107945	.	+	.	ID=TRINITY_DN16112_c0_g1_i1.path1;Name=TRINITY_DN16112_c0_g1_i1
scaffold_10	Conpu1	mRNA	107677	107945	.	+	.	ID=TRINITY_DN16112_c0_g1_i1.mrna1;Name=TRINITY_DN16112_c0_g1_i1;Parent=TRINITY_DN16112_c0_g1_i1.path1;coverage=100.0;identity=99.6;matches=268;mismatches=1;indels=0;unknowns=0
scaffold_10	Conpu1	CDS	107791	107907	100	+	0	ID=TRINITY_DN16112_c0_g1_i1.mrna1.cds1;Name=TRINITY_DN16112_c0_g1_i1;Parent=TRINITY_DN16112_c0_g1_i1.mrna1;Target=TRINITY_DN16112_c0_g1_i1 231 115 .
scaffold_10	Conpu1	exon	107910	108531	99	-	.	ID=TRINITY_DN9134_c0_g1_i1.mrna1.exon1;Name=TRINITY_DN9134_c0_g1_i1;Parent=TRINITY_DN9134_c0_g1_i1.mrna1;Target=TRINITY_DN9134_c0_g1_i1 622 1 .
scaffold_10	Conpu1	gene	107910	108531	.	-	.	ID=TRINITY_DN9134_c0_g1_i1.path1;Name=TRINITY_DN9134_c0_g1_i1
scaffold_10	Conpu1	mRNA	107910	108531	.	-	.	ID=TRINITY_DN9134_c0_g1_i1.mrna1;Name=TRINITY_DN9134_c0_g1_i1;Parent=TRINITY_DN9134_c0_g1_i1.path1;coverage=100.0;identity=99.8;matches=621;mismatches=1;indels=0;unknowns=0
scaffold_10	Conpu1	CDS	108279	108530	100	-	0	ID=TRINITY_DN9134_c0_g1_i1.mrna1.cds1;Name=TRINITY_DN9134_c0_g1_i1;Parent=TRINITY_DN9134_c0_g1_i1.mrna1;Target=TRINITY_DN9134_c0_g1_i1 253 2 .
scaffold_10	Conpu1	exon	108517	108777	99	+	.	ID=TRINITY_DN15745_c0_g1_i1.mrna1.exon1;Name=TRINITY_DN15745_c0_g1_i1;Parent=TRINITY_DN15745_c0_g1_i1.mrna1;Target=TRINITY_DN15745_c0_g1_i1 261 1 .
scaffold_10	Conpu1	gene	108517	108777	.	+	.	ID=TRINITY_DN15745_c0_g1_i1.path1;Name=TRINITY_DN15745_c0_g1_i1
scaffold_10	Conpu1	mRNA	108517	108777	.	+	.	ID=TRINITY_DN15745_c0_g1_i1.mrna1;Name=TRINITY_DN15745_c0_g1_i1;Parent=TRINITY_DN15745_c0_g1_i1.path1;coverage=100.0;identity=99.6;matches=260;mismatches=1;indels=0;unknowns=0
scaffold_10	Conpu1	CDS	108527	108775	99	+	0	ID=TRINITY_DN15745_c0_g1_i1.mrna1.cds1;Name=TRINITY_DN15745_c0_g1_i1;Parent=TRINITY_DN15745_c0_g1_i1.mrna1;Target=TRINITY_DN15745_c0_g1_i1 259 11 .
scaffold_10	Conpu1	exon	113530	113771	99	+	.	ID=TRINITY_DN6598_c0_g1_i1.mrna1.exon1;Name=TRINITY_DN6598_c0_g1_i1;Parent=TRINITY_DN6598_c0_g1_i1.mrna1;Target=TRINITY_DN6598_c0_g1_i1 242 1 .
scaffold_10	Conpu1	gene	113530	113771	.	+	.	ID=TRINITY_DN6598_c0_g1_i1.path1;Name=TRINITY_DN6598_c0_g1_i1
scaffold_10	Conpu1	mRNA	113530	113771	.	+	.	ID=TRINITY_DN6598_c0_g1_i1.mrna1;Name=TRINITY_DN6598_c0_g1_i1;Parent=TRINITY_DN6598_c0_g1_i1.path1;coverage=100.0;identity=99.6;matches=241;mismatches=1;indels=0;unknowns=0
scaffold_10	Conpu1	CDS	113549	113644	100	+	0	ID=TRINITY_DN6598_c0_g1_i1.mrna1.cds1;Name=TRINITY_DN6598_c0_g1_i1;Parent=TRINITY_DN6598_c0_g1_i1.mrna1;Target=TRINITY_DN6598_c0_g1_i1 115 20 .
scaffold_10	Conpu1	exon	140954	141054	100	-	.	ID=TRINITY_DN9904_c0_g1_i1.mrna1.exon2;Name=TRINITY_DN9904_c0_g1_i1;Parent=TRINITY_DN9904_c0_g1_i1.mrna1;Target=TRINITY_DN9904_c0_g1_i1 128 228 +
scaffold_10	Conpu1	gene	140954	141236	.	-	.	ID=TRINITY_DN9904_c0_g1_i1.path1;Name=TRINITY_DN9904_c0_g1_i1
scaffold_10	Conpu1	mRNA	140954	141236	.	-	.	ID=TRINITY_DN9904_c0_g1_i1.mrna1;Name=TRINITY_DN9904_c0_g1_i1;Parent=TRINITY_DN9904_c0_g1_i1.path1;coverage=100.0;identity=100.0;matches=228;mismatches=0;indels=0;unknowns=0
scaffold_10	Conpu1	CDS	140955	141002	100	-	0	ID=TRINITY_DN9904_c0_g1_i1.mrna1.cds1;Name=TRINITY_DN9904_c0_g1_i1;Parent=TRINITY_DN9904_c0_g1_i1.mrna1;Target=TRINITY_DN9904_c0_g1_i1 180 227 +
scaffold_10	Conpu1	exon	141110	141236	100	-	.	ID=TRINITY_DN9904_c0_g1_i1.mrna1.exon1;Name=TRINITY_DN9904_c0_g1_i1;Parent=TRINITY_DN9904_c0_g1_i1.mrna1;Target=TRINITY_DN9904_c0_g1_i1 1 127 +
scaffold_10	Conpu1	exon	141217	141413	100	+	.	ID=TRINITY_DN16455_c0_g1_i1.mrna1.exon1;Name=TRINITY_DN16455_c0_g1_i1;Parent=TRINITY_DN16455_c0_g1_i1.mrna1;Target=TRINITY_DN16455_c0_g1_i1 197 1 .
scaffold_10	Conpu1	gene	141217	141413	.	+	.	ID=TRINITY_DN16455_c0_g1_i1.path1;Name=TRINITY_DN16455_c0_g1_i1
scaffold_10	Conpu1	mRNA	141217	141413	.	+	.	ID=TRINITY_DN16455_c0_g1_i1.mrna1;Name=TRINITY_DN16455_c0_g1_i1;Parent=TRINITY_DN16455_c0_g1_i1.path1;coverage=94.7;identity=100.0;matches=197;mismatches=0;indels=0;unknowns=0
scaffold_10	Conpu1	CDS	141218	141355	100	+	0	ID=TRINITY_DN16455_c0_g1_i1.mrna1.cds1;Name=TRINITY_DN16455_c0_g1_i1;Parent=TRINITY_DN16455_c0_g1_i1.mrna1;Target=TRINITY_DN16455_c0_g1_i1 139 2 .
scaffold_10	Conpu1	CDS	142955	143134	100	+	0	ID=TRINITY_DN12680_c0_g1_i1.mrna1.cds1;Name=TRINITY_DN12680_c0_g1_i1;Parent=TRINITY_DN12680_c0_g1_i1.mrna1;Target=TRINITY_DN12680_c0_g1_i1 76 255 .
scaffold_10	Conpu1	exon	142955	143187	100	+	.	ID=TRINITY_DN12680_c0_g1_i1.mrna1.exon1;Name=TRINITY_DN12680_c0_g1_i1;Parent=TRINITY_DN12680_c0_g1_i1.mrna1;Target=TRINITY_DN12680_c0_g1_i1 23 255 -
scaffold_10	Conpu1	gene	142955	143263	.	+	.	ID=TRINITY_DN12680_c0_g1_i1.path1;Name=TRINITY_DN12680_c0_g1_i1
scaffold_10	Conpu1	mRNA	142955	143263	.	+	.	ID=TRINITY_DN12680_c0_g1_i1.mrna1;Name=TRINITY_DN12680_c0_g1_i1;Parent=TRINITY_DN12680_c0_g1_i1.path1;coverage=100.0;identity=100.0;matches=255;mismatches=0;indels=0;unknowns=0
scaffold_10	Conpu1	exon	143242	143263	100	+	.	ID=TRINITY_DN12680_c0_g1_i1.mrna1.exon2;Name=TRINITY_DN12680_c0_g1_i1;Parent=TRINITY_DN12680_c0_g1_i1.mrna1;Target=TRINITY_DN12680_c0_g1_i1 1 22 -
scaffold_10	Conpu1	exon	146248	146735	100	-	.	ID=TRINITY_DN15555_c0_g1_i1.mrna1.exon2;Name=TRINITY_DN15555_c0_g1_i1;Parent=TRINITY_DN15555_c0_g1_i1.mrna1;Target=TRINITY_DN15555_c0_g1_i1 1 488 -
scaffold_10	Conpu1	gene	146248	146976	.	-	.	ID=TRINITY_DN15555_c0_g1_i1.path1;Name=TRINITY_DN15555_c0_g1_i1
scaffold_10	Conpu1	mRNA	146248	146976	.	-	.	ID=TRINITY_DN15555_c0_g1_i1.mrna1;Name=TRINITY_DN15555_c0_g1_i1;Parent=TRINITY_DN15555_c0_g1_i1.path1;coverage=100.0;identity=100.0;matches=678;mismatches=0;indels=0;unknowns=0
scaffold_10	Conpu1	CDS	146711	146735	100	-	2	ID=TRINITY_DN15555_c0_g1_i1.mrna1.cds2;Name=TRINITY_DN15555_c0_g1_i1;Parent=TRINITY_DN15555_c0_g1_i1.mrna1;Target=TRINITY_DN15555_c0_g1_i1 464 488 .
scaffold_10	Conpu1	CDS	146787	146857	100	-	0	ID=TRINITY_DN15555_c0_g1_i1.mrna1.cds1;Name=TRINITY_DN15555_c0_g1_i1;Parent=TRINITY_DN15555_c0_g1_i1.mrna1;Target=TRINITY_DN15555_c0_g1_i1 489 559 .
scaffold_10	Conpu1	exon	146787	146976	100	-	.	ID=TRINITY_DN15555_c0_g1_i1.mrna1.exon1;Name=TRINITY_DN15555_c0_g1_i1;Parent=TRINITY_DN15555_c0_g1_i1.mrna1;Target=TRINITY_DN15555_c0_g1_i1 489 678 -
scaffold_10	Conpu1	CDS	149643	149855	100	+	0	ID=TRINITY_DN4587_c0_g1_i1.mrna1.cds1;Name=TRINITY_DN4587_c0_g1_i1;Parent=TRINITY_DN4587_c0_g1_i1.mrna1;Target=TRINITY_DN4587_c0_g1_i1 213 1 .
scaffold_10	Conpu1	exon	149643	150667	100	+	.	ID=TRINITY_DN4587_c0_g1_i1.mrna1.exon1;Name=TRINITY_DN4587_c0_g1_i1;Parent=TRINITY_DN4587_c0_g1_i1.mrna1;Target=TRINITY_DN4587_c0_g1_i1 1025 1 .
scaffold_10	Conpu1	gene	149643	150667	.	+	.	ID=TRINITY_DN4587_c0_g1_i1.path1;Name=TRINITY_DN4587_c0_g1_i1
scaffold_10	Conpu1	mRNA	149643	150667	.	+	.	ID=TRINITY_DN4587_c0_g1_i1.mrna1;Name=TRINITY_DN4587_c0_g1_i1;Parent=TRINITY_DN4587_c0_g1_i1.path1;coverage=99.9;identity=100.0;matches=1025;mismatches=0;indels=0;unknowns=0
scaffold_10	Conpu1	exon	150657	150892	100	-	.	ID=TRINITY_DN15536_c1_g1_i1.mrna1.exon1;Name=TRINITY_DN15536_c1_g1_i1;Parent=TRINITY_DN15536_c1_g1_i1.mrna1;Target=TRINITY_DN15536_c1_g1_i1 236 1 .
scaffold_10	Conpu1	gene	150657	150892	.	-	.	ID=TRINITY_DN15536_c1_g1_i1.path1;Name=TRINITY_DN15536_c1_g1_i1
scaffold_10	Conpu1	mRNA	150657	150892	.	-	.	ID=TRINITY_DN15536_c1_g1_i1.mrna1;Name=TRINITY_DN15536_c1_g1_i1;Parent=TRINITY_DN15536_c1_g1_i1.path1;coverage=96.7;identity=100.0;matches=236;mismatches=0;indels=0;unknowns=0
scaffold_10	Conpu1	CDS	150761	150892	100	-	0	ID=TRINITY_DN15536_c1_g1_i1.mrna1.cds1;Name=TRINITY_DN15536_c1_g1_i1;Parent=TRINITY_DN15536_c1_g1_i1.mrna1;Target=TRINITY_DN15536_c1_g1_i1 132 1 .
scaffold_10	Conpu1	exon	150855	151177	99	+	.	ID=TRINITY_DN15536_c0_g1_i1.mrna1.exon1;Name=TRINITY_DN15536_c0_g1_i1;Parent=TRINITY_DN15536_c0_g1_i1.mrna1;Target=TRINITY_DN15536_c0_g1_i1 323 1 .
scaffold_10	Conpu1	gene	150855	151177	.	+	.	ID=TRINITY_DN15536_c0_g1_i1.path1;Name=TRINITY_DN15536_c0_g1_i1
scaffold_10	Conpu1	mRNA	150855	151177	.	+	.	ID=TRINITY_DN15536_c0_g1_i1.mrna1;Name=TRINITY_DN15536_c0_g1_i1;Parent=TRINITY_DN15536_c0_g1_i1.path1;coverage=100.0;identity=99.7;matches=322;mismatches=1;indels=0;unknowns=0
scaffold_10	Conpu1	CDS	150954	151175	100	+	0	ID=TRINITY_DN15536_c0_g1_i1.mrna1.cds1;Name=TRINITY_DN15536_c0_g1_i1;Parent=TRINITY_DN15536_c0_g1_i1.mrna1;Target=TRINITY_DN15536_c0_g1_i1 321 100 .
scaffold_10	Conpu1	exon	157728	157943	100	-	.	ID=TRINITY_DN9931_c0_g1_i1.mrna1.exon1;Name=TRINITY_DN9931_c0_g1_i1;Parent=TRINITY_DN9931_c0_g1_i1.mrna1;Target=TRINITY_DN9931_c0_g1_i1 216 1 .
scaffold_10	Conpu1	gene	157728	157943	.	-	.	ID=TRINITY_DN9931_c0_g1_i1.path1;Name=TRINITY_DN9931_c0_g1_i1
scaffold_10	Conpu1	mRNA	157728	157943	.	-	.	ID=TRINITY_DN9931_c0_g1_i1.mrna1;Name=TRINITY_DN9931_c0_g1_i1;Parent=TRINITY_DN9931_c0_g1_i1.path1;coverage=100.0;identity=100.0;matches=216;mismatches=0;indels=0;unknowns=0
scaffold_10	Conpu1	CDS	157819	157941	100	-	0	ID=TRINITY_DN9931_c0_g1_i1.mrna1.cds1;Name=TRINITY_DN9931_c0_g1_i1;Parent=TRINITY_DN9931_c0_g1_i1.mrna1;Target=TRINITY_DN9931_c0_g1_i1 125 3 .
scaffold_10	Conpu1	exon	157956	158223	100	+	.	ID=TRINITY_DN8328_c0_g1_i1.mrna1.exon1;Name=TRINITY_DN8328_c0_g1_i1;Parent=TRINITY_DN8328_c0_g1_i1.mrna1;Target=TRINITY_DN8328_c0_g1_i1 268 1 .
scaffold_10	Conpu1	gene	157956	158223	.	+	.	ID=TRINITY_DN8328_c0_g1_i1.path1;Name=TRINITY_DN8328_c0_g1_i1
scaffold_10	Conpu1	mRNA	157956	158223	.	+	.	ID=TRINITY_DN8328_c0_g1_i1.mrna1;Name=TRINITY_DN8328_c0_g1_i1;Parent=TRINITY_DN8328_c0_g1_i1.path1;coverage=100.0;identity=100.0;matches=268;mismatches=0;indels=0;unknowns=0
scaffold_10	Conpu1	CDS	158006	158221	100	+	0	ID=TRINITY_DN8328_c0_g1_i1.mrna1.cds1;Name=TRINITY_DN8328_c0_g1_i1;Parent=TRINITY_DN8328_c0_g1_i1.mrna1;Target=TRINITY_DN8328_c0_g1_i1 266 51 .
scaffold_10	Conpu1	exon	158446	158699	100	+	.	ID=TRINITY_DN10263_c0_g1_i1.mrna1.exon1;Name=TRINITY_DN10263_c0_g1_i1;Parent=TRINITY_DN10263_c0_g1_i1.mrna1;Target=TRINITY_DN10263_c0_g1_i1 254 1 .
scaffold_10	Conpu1	gene	158446	158699	.	+	.	ID=TRINITY_DN10263_c0_g1_i1.path1;Name=TRINITY_DN10263_c0_g1_i1
scaffold_10	Conpu1	mRNA	158446	158699	.	+	.	ID=TRINITY_DN10263_c0_g1_i1.mrna1;Name=TRINITY_DN10263_c0_g1_i1;Parent=TRINITY_DN10263_c0_g1_i1.path1;coverage=100.0;identity=100.0;matches=254;mismatches=0;indels=0;unknowns=0
scaffold_10	Conpu1	CDS	158448	158576	100	+	0	ID=TRINITY_DN10263_c0_g1_i1.mrna1.cds1;Name=TRINITY_DN10263_c0_g1_i1;Parent=TRINITY_DN10263_c0_g1_i1.mrna1;Target=TRINITY_DN10263_c0_g1_i1 131 3 .
scaffold_10	Conpu1	exon	161536	161909	100	-	.	ID=TRINITY_DN8719_c0_g1_i1.mrna1.exon1;Name=TRINITY_DN8719_c0_g1_i1;Parent=TRINITY_DN8719_c0_g1_i1.mrna1;Target=TRINITY_DN8719_c0_g1_i1 374 1 .
scaffold_10	Conpu1	gene	161536	161909	.	-	.	ID=TRINITY_DN8719_c0_g1_i1.path1;Name=TRINITY_DN8719_c0_g1_i1
scaffold_10	Conpu1	mRNA	161536	161909	.	-	.	ID=TRINITY_DN8719_c0_g1_i1.mrna1;Name=TRINITY_DN8719_c0_g1_i1;Parent=TRINITY_DN8719_c0_g1_i1.path1;coverage=100.0;identity=100.0;matches=374;mismatches=0;indels=0;unknowns=0
scaffold_10	Conpu1	CDS	161762	161908	100	-	0	ID=TRINITY_DN8719_c0_g1_i1.mrna1.cds1;Name=TRINITY_DN8719_c0_g1_i1;Parent=TRINITY_DN8719_c0_g1_i1.mrna1;Target=TRINITY_DN8719_c0_g1_i1 148 2 .
scaffold_10	Conpu1	exon	162592	162808	100	+	.	ID=TRINITY_DN9366_c0_g1_i1.mrna1.exon1;Name=TRINITY_DN9366_c0_g1_i1;Parent=TRINITY_DN9366_c0_g1_i1.mrna1;Target=TRINITY_DN9366_c0_g1_i1 217 1 .
scaffold_10	Conpu1	gene	162592	162808	.	+	.	ID=TRINITY_DN9366_c0_g1_i1.path1;Name=TRINITY_DN9366_c0_g1_i1
scaffold_10	Conpu1	mRNA	162592	162808	.	+	.	ID=TRINITY_DN9366_c0_g1_i1.mrna1;Name=TRINITY_DN9366_c0_g1_i1;Parent=TRINITY_DN9366_c0_g1_i1.path1;coverage=100.0;identity=100.0;matches=217;mismatches=0;indels=0;unknowns=0
scaffold_10	Conpu1	CDS	162621	162707	100	+	0	ID=TRINITY_DN9366_c0_g1_i1.mrna1.cds1;Name=TRINITY_DN9366_c0_g1_i1;Parent=TRINITY_DN9366_c0_g1_i1.mrna1;Target=TRINITY_DN9366_c0_g1_i1 116 30 .
scaffold_10	Conpu1	exon	163309	163537	100	-	.	ID=TRINITY_DN9358_c0_g1_i1.mrna1.exon1;Name=TRINITY_DN9358_c0_g1_i1;Parent=TRINITY_DN9358_c0_g1_i1.mrna1;Target=TRINITY_DN9358_c0_g1_i1 229 1 .
scaffold_10	Conpu1	gene	163309	163537	.	-	.	ID=TRINITY_DN9358_c0_g1_i1.path1;Name=TRINITY_DN9358_c0_g1_i1
scaffold_10	Conpu1	mRNA	163309	163537	.	-	.	ID=TRINITY_DN9358_c0_g1_i1.mrna1;Name=TRINITY_DN9358_c0_g1_i1;Parent=TRINITY_DN9358_c0_g1_i1.path1;coverage=100.0;identity=100.0;matches=229;mismatches=0;indels=0;unknowns=0
scaffold_10	Conpu1	CDS	163361	163441	100	-	0	ID=TRINITY_DN9358_c0_g1_i1.mrna1.cds1;Name=TRINITY_DN9358_c0_g1_i1;Parent=TRINITY_DN9358_c0_g1_i1.mrna1;Target=TRINITY_DN9358_c0_g1_i1 177 97 .
scaffold_10	Conpu1	exon	163644	163883	100	-	.	ID=TRINITY_DN8989_c0_g1_i1.mrna1.exon1;Name=TRINITY_DN8989_c0_g1_i1;Parent=TRINITY_DN8989_c0_g1_i1.mrna1;Target=TRINITY_DN8989_c0_g1_i1 240 1 .
scaffold_10	Conpu1	gene	163644	163883	.	-	.	ID=TRINITY_DN8989_c0_g1_i1.path1;Name=TRINITY_DN8989_c0_g1_i1
scaffold_10	Conpu1	mRNA	163644	163883	.	-	.	ID=TRINITY_DN8989_c0_g1_i1.mrna1;Name=TRINITY_DN8989_c0_g1_i1;Parent=TRINITY_DN8989_c0_g1_i1.path1;coverage=100.0;identity=100.0;matches=240;mismatches=0;indels=0;unknowns=0
scaffold_10	Conpu1	CDS	163698	163883	100	-	0	ID=TRINITY_DN8989_c0_g1_i1.mrna1.cds1;Name=TRINITY_DN8989_c0_g1_i1;Parent=TRINITY_DN8989_c0_g1_i1.mrna1;Target=TRINITY_DN8989_c0_g1_i1 186 1 .
scaffold_10	Conpu1	exon	163919	164122	100	-	.	ID=TRINITY_DN10877_c0_g1_i1.mrna1.exon1;Name=TRINITY_DN10877_c0_g1_i1;Parent=TRINITY_DN10877_c0_g1_i1.mrna1;Target=TRINITY_DN10877_c0_g1_i1 204 1 .
scaffold_10	Conpu1	gene	163919	164122	.	-	.	ID=TRINITY_DN10877_c0_g1_i1.path1;Name=TRINITY_DN10877_c0_g1_i1
scaffold_10	Conpu1	mRNA	163919	164122	.	-	.	ID=TRINITY_DN10877_c0_g1_i1.mrna1;Name=TRINITY_DN10877_c0_g1_i1;Parent=TRINITY_DN10877_c0_g1_i1.path1;coverage=100.0;identity=100.0;matches=204;mismatches=0;indels=0;unknowns=0
scaffold_10	Conpu1	CDS	163979	164107	100	-	0	ID=TRINITY_DN10877_c0_g1_i1.mrna1.cds1;Name=TRINITY_DN10877_c0_g1_i1;Parent=TRINITY_DN10877_c0_g1_i1.mrna1;Target=TRINITY_DN10877_c0_g1_i1 144 16 .
scaffold_10	Conpu1	exon	164272	164453	100	+	.	ID=TRINITY_DN15034_c0_g1_i1.mrna1.exon1;Name=TRINITY_DN15034_c0_g1_i1;Parent=TRINITY_DN15034_c0_g1_i1.mrna1;Target=TRINITY_DN15034_c0_g1_i1 276 457 -
scaffold_10	Conpu1	gene	164272	164785	.	+	.	ID=TRINITY_DN15034_c0_g1_i1.path1;Name=TRINITY_DN15034_c0_g1_i1
scaffold_10	Conpu1	mRNA	164272	164785	.	+	.	ID=TRINITY_DN15034_c0_g1_i1.mrna1;Name=TRINITY_DN15034_c0_g1_i1;Parent=TRINITY_DN15034_c0_g1_i1.path1;coverage=100.0;identity=100.0;matches=457;mismatches=0;indels=0;unknowns=0
scaffold_10	Conpu1	CDS	164274	164453	100	+	0	ID=TRINITY_DN15034_c0_g1_i1.mrna1.cds1;Name=TRINITY_DN15034_c0_g1_i1;Parent=TRINITY_DN15034_c0_g1_i1.mrna1;Target=TRINITY_DN15034_c0_g1_i1 276 455 .
scaffold_10	Conpu1	CDS	164511	164708	100	+	0	ID=TRINITY_DN15034_c0_g1_i1.mrna1.cds2;Name=TRINITY_DN15034_c0_g1_i1;Parent=TRINITY_DN15034_c0_g1_i1.mrna1;Target=TRINITY_DN15034_c0_g1_i1 78 275 .
scaffold_10	Conpu1	exon	164511	164785	100	+	.	ID=TRINITY_DN15034_c0_g1_i1.mrna1.exon2;Name=TRINITY_DN15034_c0_g1_i1;Parent=TRINITY_DN15034_c0_g1_i1.mrna1;Target=TRINITY_DN15034_c0_g1_i1 1 275 -
scaffold_10	Conpu1	exon	164763	164915	100	+	.	ID=TRINITY_DN12425_c0_g1_i1.mrna1.exon1;Name=TRINITY_DN12425_c0_g1_i1;Parent=TRINITY_DN12425_c0_g1_i1.mrna1;Target=TRINITY_DN12425_c0_g1_i1 319 471 -
scaffold_10	Conpu1	gene	164763	165351	.	+	.	ID=TRINITY_DN12425_c0_g1_i1.path1;Name=TRINITY_DN12425_c0_g1_i1
scaffold_10	Conpu1	mRNA	164763	165351	.	+	.	ID=TRINITY_DN12425_c0_g1_i1.mrna1;Name=TRINITY_DN12425_c0_g1_i1;Parent=TRINITY_DN12425_c0_g1_i1.path1;coverage=100.0;identity=100.0;matches=471;mismatches=0;indels=0;unknowns=0
scaffold_10	Conpu1	CDS	164777	164915	100	+	0	ID=TRINITY_DN12425_c0_g1_i1.mrna1.cds1;Name=TRINITY_DN12425_c0_g1_i1;Parent=TRINITY_DN12425_c0_g1_i1.mrna1;Target=TRINITY_DN12425_c0_g1_i1 319 457 .
scaffold_10	Conpu1	CDS	164973	165019	100	+	1	ID=TRINITY_DN12425_c0_g1_i1.mrna1.cds2;Name=TRINITY_DN12425_c0_g1_i1;Parent=TRINITY_DN12425_c0_g1_i1.mrna1;Target=TRINITY_DN12425_c0_g1_i1 272 318 .
scaffold_10	Conpu1	exon	164973	165267	100	+	.	ID=TRINITY_DN12425_c0_g1_i1.mrna1.exon2;Name=TRINITY_DN12425_c0_g1_i1;Parent=TRINITY_DN12425_c0_g1_i1.mrna1;Target=TRINITY_DN12425_c0_g1_i1 24 318 -
scaffold_10	Conpu1	exon	165329	165351	100	+	.	ID=TRINITY_DN12425_c0_g1_i1.mrna1.exon3;Name=TRINITY_DN12425_c0_g1_i1;Parent=TRINITY_DN12425_c0_g1_i1.mrna1;Target=TRINITY_DN12425_c0_g1_i1 1 23 -
scaffold_10	Conpu1	exon	221741	222171	100	-	.	ID=TRINITY_DN11868_c0_g1_i1.mrna1.exon1;Name=TRINITY_DN11868_c0_g1_i1;Parent=TRINITY_DN11868_c0_g1_i1.mrna1;Target=TRINITY_DN11868_c0_g1_i1 431 1 .
scaffold_10	Conpu1	gene	221741	222171	.	-	.	ID=TRINITY_DN11868_c0_g1_i1.path1;Name=TRINITY_DN11868_c0_g1_i1
scaffold_10	Conpu1	mRNA	221741	222171	.	-	.	ID=TRINITY_DN11868_c0_g1_i1.mrna1;Name=TRINITY_DN11868_c0_g1_i1;Parent=TRINITY_DN11868_c0_g1_i1.path1;coverage=100.0;identity=100.0;matches=431;mismatches=0;indels=0;unknowns=0
scaffold_10	Conpu1	CDS	221944	222171	100	-	0	ID=TRINITY_DN11868_c0_g1_i1.mrna1.cds1;Name=TRINITY_DN11868_c0_g1_i1;Parent=TRINITY_DN11868_c0_g1_i1.mrna1;Target=TRINITY_DN11868_c0_g1_i1 228 1 .
scaffold_10	Conpu1	exon	222322	222786	100	-	.	ID=TRINITY_DN15930_c0_g1_i1.mrna1.exon1;Name=TRINITY_DN15930_c0_g1_i1;Parent=TRINITY_DN15930_c0_g1_i1.mrna1;Target=TRINITY_DN15930_c0_g1_i1 465 1 .
scaffold_10	Conpu1	gene	222322	222786	.	-	.	ID=TRINITY_DN15930_c0_g1_i1.path1;Name=TRINITY_DN15930_c0_g1_i1
scaffold_10	Conpu1	mRNA	222322	222786	.	-	.	ID=TRINITY_DN15930_c0_g1_i1.mrna1;Name=TRINITY_DN15930_c0_g1_i1;Parent=TRINITY_DN15930_c0_g1_i1.path1;coverage=100.0;identity=100.0;matches=465;mismatches=0;indels=0;unknowns=0
scaffold_10	Conpu1	CDS	222333	222437	100	-	0	ID=TRINITY_DN15930_c0_g1_i1.mrna1.cds1;Name=TRINITY_DN15930_c0_g1_i1;Parent=TRINITY_DN15930_c0_g1_i1.mrna1;Target=TRINITY_DN15930_c0_g1_i1 454 350 .
scaffold_10	Conpu1	exon	250070	250377	100	+	.	ID=TRINITY_DN12315_c0_g1_i1.mrna1.exon1;Name=TRINITY_DN12315_c0_g1_i1;Parent=TRINITY_DN12315_c0_g1_i1.mrna1;Target=TRINITY_DN12315_c0_g1_i1 308 1 .
scaffold_10	Conpu1	gene	250070	250377	.	+	.	ID=TRINITY_DN12315_c0_g1_i1.path1;Name=TRINITY_DN12315_c0_g1_i1
scaffold_10	Conpu1	mRNA	250070	250377	.	+	.	ID=TRINITY_DN12315_c0_g1_i1.mrna1;Name=TRINITY_DN12315_c0_g1_i1;Parent=TRINITY_DN12315_c0_g1_i1.path1;coverage=100.0;identity=100.0;matches=308;mismatches=0;indels=0;unknowns=0
scaffold_10	Conpu1	CDS	250072	250317	100	+	0	ID=TRINITY_DN12315_c0_g1_i1.mrna1.cds1;Name=TRINITY_DN12315_c0_g1_i1;Parent=TRINITY_DN12315_c0_g1_i1.mrna1;Target=TRINITY_DN12315_c0_g1_i1 248 3 .
scaffold_10	Conpu1	CDS	260880	261058	100	-	1	ID=TRINITY_DN11800_c0_g1_i1.mrna1.cds2;Name=TRINITY_DN11800_c0_g1_i1;Parent=TRINITY_DN11800_c0_g1_i1.mrna1;Target=TRINITY_DN11800_c0_g1_i1 1 179 .
scaffold_10	Conpu1	exon	260880	261058	100	-	.	ID=TRINITY_DN11800_c0_g1_i1.mrna1.exon2;Name=TRINITY_DN11800_c0_g1_i1;Parent=TRINITY_DN11800_c0_g1_i1.mrna1;Target=TRINITY_DN11800_c0_g1_i1 1 179 -
scaffold_10	Conpu1	gene	260880	261140	.	-	.	ID=TRINITY_DN11800_c0_g1_i1.path1;Name=TRINITY_DN11800_c0_g1_i1
scaffold_10	Conpu1	mRNA	260880	261140	.	-	.	ID=TRINITY_DN11800_c0_g1_i1.mrna1;Name=TRINITY_DN11800_c0_g1_i1;Parent=TRINITY_DN11800_c0_g1_i1.path1;coverage=100.0;identity=100.0;matches=205;mismatches=0;indels=0;unknowns=0
scaffold_10	Conpu1	CDS	261115	261139	100	-	0	ID=TRINITY_DN11800_c0_g1_i1.mrna1.cds1;Name=TRINITY_DN11800_c0_g1_i1;Parent=TRINITY_DN11800_c0_g1_i1.mrna1;Target=TRINITY_DN11800_c0_g1_i1 180 204 .
scaffold_10	Conpu1	exon	261115	261140	100	-	.	ID=TRINITY_DN11800_c0_g1_i1.mrna1.exon1;Name=TRINITY_DN11800_c0_g1_i1;Parent=TRINITY_DN11800_c0_g1_i1.mrna1;Target=TRINITY_DN11800_c0_g1_i1 180 205 -
scaffold_10	Conpu1	exon	293102	293445	100	-	.	ID=TRINITY_DN16335_c0_g1_i1.mrna1.exon2;Name=TRINITY_DN16335_c0_g1_i1;Parent=TRINITY_DN16335_c0_g1_i1.mrna1;Target=TRINITY_DN16335_c0_g1_i1 360 17 .
scaffold_10	Conpu1	gene	293102	293507	.	-	.	ID=TRINITY_DN16335_c0_g1_i1.path1;Name=TRINITY_DN16335_c0_g1_i1
scaffold_10	Conpu1	mRNA	293102	293507	.	-	.	ID=TRINITY_DN16335_c0_g1_i1.mrna1;Name=TRINITY_DN16335_c0_g1_i1;Parent=TRINITY_DN16335_c0_g1_i1.path1;coverage=98.6;identity=100.0;matches=360;mismatches=0;indels=0;unknowns=0
scaffold_10	Conpu1	CDS	293278	293445	100	-	0	ID=TRINITY_DN16335_c0_g1_i1.mrna1.cds2;Name=TRINITY_DN16335_c0_g1_i1;Parent=TRINITY_DN16335_c0_g1_i1.mrna1;Target=TRINITY_DN16335_c0_g1_i1 184 17 .
scaffold_10	Conpu1	CDS	293492	293506	100	-	0	ID=TRINITY_DN16335_c0_g1_i1.mrna1.cds1;Name=TRINITY_DN16335_c0_g1_i1;Parent=TRINITY_DN16335_c0_g1_i1.mrna1;Target=TRINITY_DN16335_c0_g1_i1 16 2 .
scaffold_10	Conpu1	exon	293492	293507	100	-	.	ID=TRINITY_DN16335_c0_g1_i1.mrna1.exon1;Name=TRINITY_DN16335_c0_g1_i1;Parent=TRINITY_DN16335_c0_g1_i1.mrna1;Target=TRINITY_DN16335_c0_g1_i1 16 1 .
scaffold_10	Conpu1	exon	293492	293743	100	-	.	ID=TRINITY_DN14454_c0_g1_i1.mrna1.exon1;Name=TRINITY_DN14454_c0_g1_i1;Parent=TRINITY_DN14454_c0_g1_i1.mrna1;Target=TRINITY_DN14454_c0_g1_i1 272 21 .
scaffold_10	Conpu1	gene	293492	293743	.	-	.	ID=TRINITY_DN14454_c0_g1_i1.path1;Name=TRINITY_DN14454_c0_g1_i1
scaffold_10	Conpu1	mRNA	293492	293743	.	-	.	ID=TRINITY_DN14454_c0_g1_i1.mrna1;Name=TRINITY_DN14454_c0_g1_i1;Parent=TRINITY_DN14454_c0_g1_i1.path1;coverage=90.3;identity=100.0;matches=252;mismatches=0;indels=0;unknowns=0
scaffold_10	Conpu1	CDS	293588	293743	100	-	0	ID=TRINITY_DN14454_c0_g1_i1.mrna1.cds1;Name=TRINITY_DN14454_c0_g1_i1;Parent=TRINITY_DN14454_c0_g1_i1.mrna1;Target=TRINITY_DN14454_c0_g1_i1 176 21 .
scaffold_10	Conpu1	exon	295587	295859	99	-	.	ID=TRINITY_DN9913_c0_g1_i1.mrna1.exon1;Name=TRINITY_DN9913_c0_g1_i1;Parent=TRINITY_DN9913_c0_g1_i1.mrna1;Target=TRINITY_DN9913_c0_g1_i1 273 1 .
scaffold_10	Conpu1	gene	295587	295859	.	-	.	ID=TRINITY_DN9913_c0_g1_i1.path1;Name=TRINITY_DN9913_c0_g1_i1
scaffold_10	Conpu1	mRNA	295587	295859	.	-	.	ID=TRINITY_DN9913_c0_g1_i1.mrna1;Name=TRINITY_DN9913_c0_g1_i1;Parent=TRINITY_DN9913_c0_g1_i1.path1;coverage=100.0;identity=99.6;matches=272;mismatches=1;indels=0;unknowns=0
scaffold_10	Conpu1	CDS	295644	295805	100	-	0	ID=TRINITY_DN9913_c0_g1_i1.mrna1.cds1;Name=TRINITY_DN9913_c0_g1_i1;Parent=TRINITY_DN9913_c0_g1_i1.mrna1;Target=TRINITY_DN9913_c0_g1_i1 216 55 .
scaffold_10	Conpu1	exon	297298	297668	100	-	.	ID=TRINITY_DN10513_c0_g1_i1.mrna1.exon1;Name=TRINITY_DN10513_c0_g1_i1;Parent=TRINITY_DN10513_c0_g1_i1.mrna1;Target=TRINITY_DN10513_c0_g1_i1 371 1 .
scaffold_10	Conpu1	gene	297298	297668	.	-	.	ID=TRINITY_DN10513_c0_g1_i1.path1;Name=TRINITY_DN10513_c0_g1_i1
scaffold_10	Conpu1	mRNA	297298	297668	.	-	.	ID=TRINITY_DN10513_c0_g1_i1.mrna1;Name=TRINITY_DN10513_c0_g1_i1;Parent=TRINITY_DN10513_c0_g1_i1.path1;coverage=100.0;identity=100.0;matches=371;mismatches=0;indels=0;unknowns=0
scaffold_10	Conpu1	CDS	297299	297667	100	-	0	ID=TRINITY_DN10513_c0_g1_i1.mrna1.cds1;Name=TRINITY_DN10513_c0_g1_i1;Parent=TRINITY_DN10513_c0_g1_i1.mrna1;Target=TRINITY_DN10513_c0_g1_i1 370 2 .
scaffold_10	Conpu1	exon	297652	298089	100	+	.	ID=TRINITY_DN4176_c0_g1_i1.mrna1.exon1;Name=TRINITY_DN4176_c0_g1_i1;Parent=TRINITY_DN4176_c0_g1_i1.mrna1;Target=TRINITY_DN4176_c0_g1_i1 438 1 .
scaffold_10	Conpu1	gene	297652	298089	.	+	.	ID=TRINITY_DN4176_c0_g1_i1.path1;Name=TRINITY_DN4176_c0_g1_i1
scaffold_10	Conpu1	mRNA	297652	298089	.	+	.	ID=TRINITY_DN4176_c0_g1_i1.mrna1;Name=TRINITY_DN4176_c0_g1_i1;Parent=TRINITY_DN4176_c0_g1_i1.path1;coverage=100.0;identity=100.0;matches=438;mismatches=0;indels=0;unknowns=0
scaffold_10	Conpu1	CDS	297803	298039	100	+	0	ID=TRINITY_DN4176_c0_g1_i1.mrna1.cds1;Name=TRINITY_DN4176_c0_g1_i1;Parent=TRINITY_DN4176_c0_g1_i1.mrna1;Target=TRINITY_DN4176_c0_g1_i1 388 152 .
scaffold_10	Conpu1	exon	298317	298577	100	-	.	ID=TRINITY_DN11989_c0_g1_i1.mrna1.exon1;Name=TRINITY_DN11989_c0_g1_i1;Parent=TRINITY_DN11989_c0_g1_i1.mrna1;Target=TRINITY_DN11989_c0_g1_i1 261 1 .
scaffold_10	Conpu1	gene	298317	298577	.	-	.	ID=TRINITY_DN11989_c0_g1_i1.path1;Name=TRINITY_DN11989_c0_g1_i1
scaffold_10	Conpu1	mRNA	298317	298577	.	-	.	ID=TRINITY_DN11989_c0_g1_i1.mrna1;Name=TRINITY_DN11989_c0_g1_i1;Parent=TRINITY_DN11989_c0_g1_i1.path1;coverage=100.0;identity=100.0;matches=261;mismatches=0;indels=0;unknowns=0
scaffold_10	Conpu1	CDS	298319	298576	100	-	0	ID=TRINITY_DN11989_c0_g1_i1.mrna1.cds1;Name=TRINITY_DN11989_c0_g1_i1;Parent=TRINITY_DN11989_c0_g1_i1.mrna1;Target=TRINITY_DN11989_c0_g1_i1 259 2 .
scaffold_10	Conpu1	exon	317089	317182	100	-	.	ID=TRINITY_DN13142_c0_g1_i1.mrna1.exon2;Name=TRINITY_DN13142_c0_g1_i1;Parent=TRINITY_DN13142_c0_g1_i1.mrna1;Target=TRINITY_DN13142_c0_g1_i1 136 229 +
scaffold_10	Conpu1	gene	317089	317403	.	-	.	ID=TRINITY_DN13142_c0_g1_i1.path1;Name=TRINITY_DN13142_c0_g1_i1
scaffold_10	Conpu1	mRNA	317089	317403	.	-	.	ID=TRINITY_DN13142_c0_g1_i1.mrna1;Name=TRINITY_DN13142_c0_g1_i1;Parent=TRINITY_DN13142_c0_g1_i1.path1;coverage=99.6;identity=100.0;matches=229;mismatches=0;indels=0;unknowns=0
scaffold_10	Conpu1	CDS	317180	317182	100	-	0	ID=TRINITY_DN13142_c0_g1_i1.mrna1.cds2;Name=TRINITY_DN13142_c0_g1_i1;Parent=TRINITY_DN13142_c0_g1_i1.mrna1;Target=TRINITY_DN13142_c0_g1_i1 136 138 +
scaffold_10	Conpu1	CDS	317269	317403	100	-	0	ID=TRINITY_DN13142_c0_g1_i1.mrna1.cds1;Name=TRINITY_DN13142_c0_g1_i1;Parent=TRINITY_DN13142_c0_g1_i1.mrna1;Target=TRINITY_DN13142_c0_g1_i1 1 135 +
scaffold_10	Conpu1	exon	317269	317403	100	-	.	ID=TRINITY_DN13142_c0_g1_i1.mrna1.exon1;Name=TRINITY_DN13142_c0_g1_i1;Parent=TRINITY_DN13142_c0_g1_i1.mrna1;Target=TRINITY_DN13142_c0_g1_i1 1 135 +
scaffold_10	Conpu1	exon	326471	326698	100	+	.	ID=TRINITY_DN9578_c0_g1_i1.mrna1.exon1;Name=TRINITY_DN9578_c0_g1_i1;Parent=TRINITY_DN9578_c0_g1_i1.mrna1;Target=TRINITY_DN9578_c0_g1_i1 228 1 .
scaffold_10	Conpu1	gene	326471	326698	.	+	.	ID=TRINITY_DN9578_c0_g1_i1.path1;Name=TRINITY_DN9578_c0_g1_i1
scaffold_10	Conpu1	mRNA	326471	326698	.	+	.	ID=TRINITY_DN9578_c0_g1_i1.mrna1;Name=TRINITY_DN9578_c0_g1_i1;Parent=TRINITY_DN9578_c0_g1_i1.path1;coverage=100.0;identity=100.0;matches=228;mismatches=0;indels=0;unknowns=0
scaffold_10	Conpu1	CDS	326472	326696	100	+	0	ID=TRINITY_DN9578_c0_g1_i1.mrna1.cds1;Name=TRINITY_DN9578_c0_g1_i1;Parent=TRINITY_DN9578_c0_g1_i1.mrna1;Target=TRINITY_DN9578_c0_g1_i1 226 2 .
scaffold_10	Conpu1	exon	352520	352881	100	+	.	ID=TRINITY_DN9566_c0_g1_i1.mrna1.exon1;Name=TRINITY_DN9566_c0_g1_i1;Parent=TRINITY_DN9566_c0_g1_i1.mrna1;Target=TRINITY_DN9566_c0_g1_i1 362 1 .
scaffold_10	Conpu1	gene	352520	352881	.	+	.	ID=TRINITY_DN9566_c0_g1_i1.path1;Name=TRINITY_DN9566_c0_g1_i1
scaffold_10	Conpu1	mRNA	352520	352881	.	+	.	ID=TRINITY_DN9566_c0_g1_i1.mrna1;Name=TRINITY_DN9566_c0_g1_i1;Parent=TRINITY_DN9566_c0_g1_i1.path1;coverage=100.0;identity=100.0;matches=362;mismatches=0;indels=0;unknowns=0
scaffold_10	Conpu1	CDS	352522	352806	100	+	0	ID=TRINITY_DN9566_c0_g1_i1.mrna1.cds1;Name=TRINITY_DN9566_c0_g1_i1;Parent=TRINITY_DN9566_c0_g1_i1.mrna1;Target=TRINITY_DN9566_c0_g1_i1 287 3 .
scaffold_10	Conpu1	exon	353700	353792	100	-	.	ID=TRINITY_DN9745_c0_g1_i1.mrna1.exon2;Name=TRINITY_DN9745_c0_g1_i1;Parent=TRINITY_DN9745_c0_g1_i1.mrna1;Target=TRINITY_DN9745_c0_g1_i1 1 93 -
scaffold_10	Conpu1	gene	353700	354140	.	-	.	ID=TRINITY_DN9745_c0_g1_i1.path1;Name=TRINITY_DN9745_c0_g1_i1
scaffold_10	Conpu1	mRNA	353700	354140	.	-	.	ID=TRINITY_DN9745_c0_g1_i1.mrna1;Name=TRINITY_DN9745_c0_g1_i1;Parent=TRINITY_DN9745_c0_g1_i1.path1;coverage=100.0;identity=100.0;matches=366;mismatches=0;indels=0;unknowns=0
scaffold_10	Conpu1	CDS	353701	353792	100	-	1	ID=TRINITY_DN9745_c0_g1_i1.mrna1.cds2;Name=TRINITY_DN9745_c0_g1_i1;Parent=TRINITY_DN9745_c0_g1_i1.mrna1;Target=TRINITY_DN9745_c0_g1_i1 2 93 .
scaffold_10	Conpu1	CDS	353868	353880	100	-	0	ID=TRINITY_DN9745_c0_g1_i1.mrna1.cds1;Name=TRINITY_DN9745_c0_g1_i1;Parent=TRINITY_DN9745_c0_g1_i1.mrna1;Target=TRINITY_DN9745_c0_g1_i1 94 106 .
scaffold_10	Conpu1	exon	353868	354140	100	-	.	ID=TRINITY_DN9745_c0_g1_i1.mrna1.exon1;Name=TRINITY_DN9745_c0_g1_i1;Parent=TRINITY_DN9745_c0_g1_i1.mrna1;Target=TRINITY_DN9745_c0_g1_i1 94 366 -
scaffold_10	Conpu1	exon	363006	363208	100	+	.	ID=TRINITY_DN6178_c0_g1_i1.mrna1.exon1;Name=TRINITY_DN6178_c0_g1_i1;Parent=TRINITY_DN6178_c0_g1_i1.mrna1;Target=TRINITY_DN6178_c0_g1_i1 132 334 -
scaffold_10	Conpu1	gene	363006	363462	.	+	.	ID=TRINITY_DN6178_c0_g1_i1.path1;Name=TRINITY_DN6178_c0_g1_i1
scaffold_10	Conpu1	mRNA	363006	363462	.	+	.	ID=TRINITY_DN6178_c0_g1_i1.mrna1;Name=TRINITY_DN6178_c0_g1_i1;Parent=TRINITY_DN6178_c0_g1_i1.path1;coverage=100.0;identity=99.7;matches=333;mismatches=1;indels=0;unknowns=0
scaffold_10	Conpu1	CDS	363138	363208	100	+	0	ID=TRINITY_DN6178_c0_g1_i1.mrna1.cds1;Name=TRINITY_DN6178_c0_g1_i1;Parent=TRINITY_DN6178_c0_g1_i1.mrna1;Target=TRINITY_DN6178_c0_g1_i1 132 202 .
scaffold_10	Conpu1	CDS	363260	363347	100	+	2	ID=TRINITY_DN6178_c0_g1_i1.mrna1.cds2;Name=TRINITY_DN6178_c0_g1_i1;Parent=TRINITY_DN6178_c0_g1_i1.mrna1;Target=TRINITY_DN6178_c0_g1_i1 44 131 .
scaffold_10	Conpu1	exon	363260	363367	100	+	.	ID=TRINITY_DN6178_c0_g1_i1.mrna1.exon2;Name=TRINITY_DN6178_c0_g1_i1;Parent=TRINITY_DN6178_c0_g1_i1.mrna1;Target=TRINITY_DN6178_c0_g1_i1 24 131 -
scaffold_10	Conpu1	exon	363440	363462	95	+	.	ID=TRINITY_DN6178_c0_g1_i1.mrna1.exon3;Name=TRINITY_DN6178_c0_g1_i1;Parent=TRINITY_DN6178_c0_g1_i1.mrna1;Target=TRINITY_DN6178_c0_g1_i1 1 23 -
scaffold_10	Conpu1	exon	384877	385531	100	+	.	ID=TRINITY_DN8643_c0_g1_i1.mrna1.exon1;Name=TRINITY_DN8643_c0_g1_i1;Parent=TRINITY_DN8643_c0_g1_i1.mrna1;Target=TRINITY_DN8643_c0_g1_i1 655 1 .
scaffold_10	Conpu1	gene	384877	385531	.	+	.	ID=TRINITY_DN8643_c0_g1_i1.path1;Name=TRINITY_DN8643_c0_g1_i1
scaffold_10	Conpu1	mRNA	384877	385531	.	+	.	ID=TRINITY_DN8643_c0_g1_i1.mrna1;Name=TRINITY_DN8643_c0_g1_i1;Parent=TRINITY_DN8643_c0_g1_i1.path1;coverage=100.0;identity=100.0;matches=655;mismatches=0;indels=0;unknowns=0
scaffold_10	Conpu1	CDS	384878	385177	100	+	0	ID=TRINITY_DN8643_c0_g1_i1.mrna1.cds1;Name=TRINITY_DN8643_c0_g1_i1;Parent=TRINITY_DN8643_c0_g1_i1.mrna1;Target=TRINITY_DN8643_c0_g1_i1 301 2 .
scaffold_10	Conpu1	exon	393359	393404	100	+	.	ID=TRINITY_DN4136_c0_g1_i1.mrna1.exon1;Name=TRINITY_DN4136_c0_g1_i1;Parent=TRINITY_DN4136_c0_g1_i1.mrna1;Target=TRINITY_DN4136_c0_g1_i1 727 772 -
scaffold_10	Conpu1	gene	393359	394195	.	+	.	ID=TRINITY_DN4136_c0_g1_i1.path1;Name=TRINITY_DN4136_c0_g1_i1
scaffold_10	Conpu1	mRNA	393359	394195	.	+	.	ID=TRINITY_DN4136_c0_g1_i1.mrna1;Name=TRINITY_DN4136_c0_g1_i1;Parent=TRINITY_DN4136_c0_g1_i1.path1;coverage=100.0;identity=100.0;matches=772;mismatches=0;indels=0;unknowns=0
scaffold_10	Conpu1	exon	393470	394195	100	+	.	ID=TRINITY_DN4136_c0_g1_i1.mrna1.exon2;Name=TRINITY_DN4136_c0_g1_i1;Parent=TRINITY_DN4136_c0_g1_i1.mrna1;Target=TRINITY_DN4136_c0_g1_i1 1 726 -
scaffold_10	Conpu1	CDS	393813	394010	100	+	0	ID=TRINITY_DN4136_c0_g1_i1.mrna1.cds1;Name=TRINITY_DN4136_c0_g1_i1;Parent=TRINITY_DN4136_c0_g1_i1.mrna1;Target=TRINITY_DN4136_c0_g1_i1 186 383 .
scaffold_10	Conpu1	exon	395482	395682	100	+	.	ID=TRINITY_DN16692_c0_g1_i1.mrna1.exon1;Name=TRINITY_DN16692_c0_g1_i1;Parent=TRINITY_DN16692_c0_g1_i1.mrna1;Target=TRINITY_DN16692_c0_g1_i1 201 1 .
scaffold_10	Conpu1	gene	395482	395682	.	+	.	ID=TRINITY_DN16692_c0_g1_i1.path1;Name=TRINITY_DN16692_c0_g1_i1
scaffold_10	Conpu1	mRNA	395482	395682	.	+	.	ID=TRINITY_DN16692_c0_g1_i1.mrna1;Name=TRINITY_DN16692_c0_g1_i1;Parent=TRINITY_DN16692_c0_g1_i1.path1;coverage=100.0;identity=100.0;matches=201;mismatches=0;indels=0;unknowns=0
scaffold_10	Conpu1	CDS	395484	395657	100	+	0	ID=TRINITY_DN16692_c0_g1_i1.mrna1.cds1;Name=TRINITY_DN16692_c0_g1_i1;Parent=TRINITY_DN16692_c0_g1_i1.mrna1;Target=TRINITY_DN16692_c0_g1_i1 176 3 .
scaffold_10	Conpu1	exon	423622	423878	100	+	.	ID=TRINITY_DN7759_c0_g1_i1.mrna1.exon1;Name=TRINITY_DN7759_c0_g1_i1;Parent=TRINITY_DN7759_c0_g1_i1.mrna1;Target=TRINITY_DN7759_c0_g1_i1 257 1 .
scaffold_10	Conpu1	gene	423622	423878	.	+	.	ID=TRINITY_DN7759_c0_g1_i1.path1;Name=TRINITY_DN7759_c0_g1_i1
scaffold_10	Conpu1	mRNA	423622	423878	.	+	.	ID=TRINITY_DN7759_c0_g1_i1.mrna1;Name=TRINITY_DN7759_c0_g1_i1;Parent=TRINITY_DN7759_c0_g1_i1.path1;coverage=100.0;identity=100.0;matches=257;mismatches=0;indels=0;unknowns=0
scaffold_10	Conpu1	CDS	423672	423878	100	+	0	ID=TRINITY_DN7759_c0_g1_i1.mrna1.cds1;Name=TRINITY_DN7759_c0_g1_i1;Parent=TRINITY_DN7759_c0_g1_i1.mrna1;Target=TRINITY_DN7759_c0_g1_i1 257 51 .
scaffold_10	Conpu1	exon	425443	425618	100	-	.	ID=TRINITY_DN13243_c0_g1_i1.mrna1.exon2;Name=TRINITY_DN13243_c0_g1_i1;Parent=TRINITY_DN13243_c0_g1_i1.mrna1;Target=TRINITY_DN13243_c0_g1_i1 1 176 -
scaffold_10	Conpu1	gene	425443	425777	.	-	.	ID=TRINITY_DN13243_c0_g1_i1.path1;Name=TRINITY_DN13243_c0_g1_i1
scaffold_10	Conpu1	mRNA	425443	425777	.	-	.	ID=TRINITY_DN13243_c0_g1_i1.mrna1;Name=TRINITY_DN13243_c0_g1_i1;Parent=TRINITY_DN13243_c0_g1_i1.path1;coverage=100.0;identity=100.0;matches=280;mismatches=0;indels=0;unknowns=0
scaffold_10	Conpu1	CDS	425515	425577	100	-	0	ID=TRINITY_DN13243_c0_g1_i1.mrna1.cds1;Name=TRINITY_DN13243_c0_g1_i1;Parent=TRINITY_DN13243_c0_g1_i1.mrna1;Target=TRINITY_DN13243_c0_g1_i1 73 135 .
scaffold_10	Conpu1	exon	425674	425777	100	-	.	ID=TRINITY_DN13243_c0_g1_i1.mrna1.exon1;Name=TRINITY_DN13243_c0_g1_i1;Parent=TRINITY_DN13243_c0_g1_i1.mrna1;Target=TRINITY_DN13243_c0_g1_i1 177 280 -
scaffold_10	Conpu1	exon	446044	446314	100	+	.	ID=TRINITY_DN9526_c0_g1_i1.mrna1.exon1;Name=TRINITY_DN9526_c0_g1_i1;Parent=TRINITY_DN9526_c0_g1_i1.mrna1;Target=TRINITY_DN9526_c0_g1_i1 271 1 .
scaffold_10	Conpu1	gene	446044	446314	.	+	.	ID=TRINITY_DN9526_c0_g1_i1.path1;Name=TRINITY_DN9526_c0_g1_i1
scaffold_10	Conpu1	mRNA	446044	446314	.	+	.	ID=TRINITY_DN9526_c0_g1_i1.mrna1;Name=TRINITY_DN9526_c0_g1_i1;Parent=TRINITY_DN9526_c0_g1_i1.path1;coverage=100.0;identity=100.0;matches=271;mismatches=0;indels=0;unknowns=0
scaffold_10	Conpu1	CDS	446046	446180	100	+	0	ID=TRINITY_DN9526_c0_g1_i1.mrna1.cds1;Name=TRINITY_DN9526_c0_g1_i1;Parent=TRINITY_DN9526_c0_g1_i1.mrna1;Target=TRINITY_DN9526_c0_g1_i1 137 3 .
scaffold_10	Conpu1	exon	449232	449548	100	+	.	ID=TRINITY_DN15938_c0_g1_i1.mrna1.exon1;Name=TRINITY_DN15938_c0_g1_i1;Parent=TRINITY_DN15938_c0_g1_i1.mrna1;Target=TRINITY_DN15938_c0_g1_i1 108 424 -
scaffold_10	Conpu1	gene	449232	449728	.	+	.	ID=TRINITY_DN15938_c0_g1_i1.path1;Name=TRINITY_DN15938_c0_g1_i1
scaffold_10	Conpu1	mRNA	449232	449728	.	+	.	ID=TRINITY_DN15938_c0_g1_i1.mrna1;Name=TRINITY_DN15938_c0_g1_i1;Parent=TRINITY_DN15938_c0_g1_i1.path1;coverage=100.0;identity=100.0;matches=424;mismatches=0;indels=0;unknowns=0
scaffold_10	Conpu1	CDS	449375	449482	100	+	0	ID=TRINITY_DN15938_c0_g1_i1.mrna1.cds1;Name=TRINITY_DN15938_c0_g1_i1;Parent=TRINITY_DN15938_c0_g1_i1.mrna1;Target=TRINITY_DN15938_c0_g1_i1 174 281 .
scaffold_10	Conpu1	exon	449622	449728	100	+	.	ID=TRINITY_DN15938_c0_g1_i1.mrna1.exon2;Name=TRINITY_DN15938_c0_g1_i1;Parent=TRINITY_DN15938_c0_g1_i1.mrna1;Target=TRINITY_DN15938_c0_g1_i1 1 107 -
scaffold_10	Conpu1	exon	477570	477781	100	+	.	ID=TRINITY_DN5356_c0_g1_i1.mrna1.exon1;Name=TRINITY_DN5356_c0_g1_i1;Parent=TRINITY_DN5356_c0_g1_i1.mrna1;Target=TRINITY_DN5356_c0_g1_i1 212 1 .
scaffold_10	Conpu1	gene	477570	477781	.	+	.	ID=TRINITY_DN5356_c0_g1_i1.path1;Name=TRINITY_DN5356_c0_g1_i1
scaffold_10	Conpu1	mRNA	477570	477781	.	+	.	ID=TRINITY_DN5356_c0_g1_i1.mrna1;Name=TRINITY_DN5356_c0_g1_i1;Parent=TRINITY_DN5356_c0_g1_i1.path1;coverage=100.0;identity=100.0;matches=212;mismatches=0;indels=0;unknowns=0
scaffold_10	Conpu1	CDS	477571	477732	100	+	0	ID=TRINITY_DN5356_c0_g1_i1.mrna1.cds1;Name=TRINITY_DN5356_c0_g1_i1;Parent=TRINITY_DN5356_c0_g1_i1.mrna1;Target=TRINITY_DN5356_c0_g1_i1 163 2 .
scaffold_10	Conpu1	exon	478085	478653	100	+	.	ID=TRINITY_DN1381_c0_g1_i1.mrna1.exon1;Name=TRINITY_DN1381_c0_g1_i1;Parent=TRINITY_DN1381_c0_g1_i1.mrna1;Target=TRINITY_DN1381_c0_g1_i1 569 1 .
scaffold_10	Conpu1	gene	478085	478653	.	+	.	ID=TRINITY_DN1381_c0_g1_i1.path1;Name=TRINITY_DN1381_c0_g1_i1
scaffold_10	Conpu1	mRNA	478085	478653	.	+	.	ID=TRINITY_DN1381_c0_g1_i1.mrna1;Name=TRINITY_DN1381_c0_g1_i1;Parent=TRINITY_DN1381_c0_g1_i1.path1;coverage=100.0;identity=100.0;matches=569;mismatches=0;indels=0;unknowns=0
scaffold_10	Conpu1	CDS	478519	478632	100	+	0	ID=TRINITY_DN1381_c0_g1_i1.mrna1.cds1;Name=TRINITY_DN1381_c0_g1_i1;Parent=TRINITY_DN1381_c0_g1_i1.mrna1;Target=TRINITY_DN1381_c0_g1_i1 548 435 .
scaffold_10	Conpu1	exon	508558	508606	100	-	.	ID=TRINITY_DN5862_c0_g1_i1.mrna1.exon2;Name=TRINITY_DN5862_c0_g1_i1;Parent=TRINITY_DN5862_c0_g1_i1.mrna1;Target=TRINITY_DN5862_c0_g1_i1 317 365 +
scaffold_10	Conpu1	gene	508558	508985	.	-	.	ID=TRINITY_DN5862_c0_g1_i1.path1;Name=TRINITY_DN5862_c0_g1_i1
scaffold_10	Conpu1	mRNA	508558	508985	.	-	.	ID=TRINITY_DN5862_c0_g1_i1.mrna1;Name=TRINITY_DN5862_c0_g1_i1;Parent=TRINITY_DN5862_c0_g1_i1.path1;coverage=100.0;identity=100.0;matches=365;mismatches=0;indels=0;unknowns=0
scaffold_10	Conpu1	CDS	508559	508606	100	-	0	ID=TRINITY_DN5862_c0_g1_i1.mrna1.cds2;Name=TRINITY_DN5862_c0_g1_i1;Parent=TRINITY_DN5862_c0_g1_i1.mrna1;Target=TRINITY_DN5862_c0_g1_i1 317 364 +
scaffold_10	Conpu1	CDS	508670	508753	100	-	0	ID=TRINITY_DN5862_c0_g1_i1.mrna1.cds1;Name=TRINITY_DN5862_c0_g1_i1;Parent=TRINITY_DN5862_c0_g1_i1.mrna1;Target=TRINITY_DN5862_c0_g1_i1 233 316 +
scaffold_10	Conpu1	exon	508670	508985	100	-	.	ID=TRINITY_DN5862_c0_g1_i1.mrna1.exon1;Name=TRINITY_DN5862_c0_g1_i1;Parent=TRINITY_DN5862_c0_g1_i1.mrna1;Target=TRINITY_DN5862_c0_g1_i1 1 316 +
scaffold_10	Conpu1	exon	511674	512011	100	+	.	ID=TRINITY_DN16446_c0_g1_i1.mrna1.exon1;Name=TRINITY_DN16446_c0_g1_i1;Parent=TRINITY_DN16446_c0_g1_i1.mrna1;Target=TRINITY_DN16446_c0_g1_i1 338 1 .
scaffold_10	Conpu1	gene	511674	512011	.	+	.	ID=TRINITY_DN16446_c0_g1_i1.path1;Name=TRINITY_DN16446_c0_g1_i1
scaffold_10	Conpu1	mRNA	511674	512011	.	+	.	ID=TRINITY_DN16446_c0_g1_i1.mrna1;Name=TRINITY_DN16446_c0_g1_i1;Parent=TRINITY_DN16446_c0_g1_i1.path1;coverage=100.0;identity=100.0;matches=338;mismatches=0;indels=0;unknowns=0
scaffold_10	Conpu1	CDS	511675	511947	100	+	0	ID=TRINITY_DN16446_c0_g1_i1.mrna1.cds1;Name=TRINITY_DN16446_c0_g1_i1;Parent=TRINITY_DN16446_c0_g1_i1.mrna1;Target=TRINITY_DN16446_c0_g1_i1 274 2 .
scaffold_10	Conpu1	exon	523191	523462	100	-	.	ID=TRINITY_DN9851_c0_g1_i1.mrna1.exon1;Name=TRINITY_DN9851_c0_g1_i1;Parent=TRINITY_DN9851_c0_g1_i1.mrna1;Target=TRINITY_DN9851_c0_g1_i1 272 1 .
scaffold_10	Conpu1	gene	523191	523462	.	-	.	ID=TRINITY_DN9851_c0_g1_i1.path1;Name=TRINITY_DN9851_c0_g1_i1
scaffold_10	Conpu1	mRNA	523191	523462	.	-	.	ID=TRINITY_DN9851_c0_g1_i1.mrna1;Name=TRINITY_DN9851_c0_g1_i1;Parent=TRINITY_DN9851_c0_g1_i1.path1;coverage=100.0;identity=100.0;matches=272;mismatches=0;indels=0;unknowns=0
scaffold_10	Conpu1	CDS	523193	523462	100	-	0	ID=TRINITY_DN9851_c0_g1_i1.mrna1.cds1;Name=TRINITY_DN9851_c0_g1_i1;Parent=TRINITY_DN9851_c0_g1_i1.mrna1;Target=TRINITY_DN9851_c0_g1_i1 270 1 .
scaffold_10	Conpu1	CDS	633849	634094	100	+	0	ID=TRINITY_DN9397_c0_g1_i1.mrna1.cds1;Name=TRINITY_DN9397_c0_g1_i1;Parent=TRINITY_DN9397_c0_g1_i1.mrna1;Target=TRINITY_DN9397_c0_g1_i1 246 1 .
scaffold_10	Conpu1	exon	633849	634094	100	+	.	ID=TRINITY_DN9397_c0_g1_i1.mrna1.exon1;Name=TRINITY_DN9397_c0_g1_i1;Parent=TRINITY_DN9397_c0_g1_i1.mrna1;Target=TRINITY_DN9397_c0_g1_i1 246 1 .
scaffold_10	Conpu1	gene	633849	634094	.	+	.	ID=TRINITY_DN9397_c0_g1_i1.path1;Name=TRINITY_DN9397_c0_g1_i1
scaffold_10	Conpu1	mRNA	633849	634094	.	+	.	ID=TRINITY_DN9397_c0_g1_i1.mrna1;Name=TRINITY_DN9397_c0_g1_i1;Parent=TRINITY_DN9397_c0_g1_i1.path1;coverage=100.0;identity=100.0;matches=246;mismatches=0;indels=0;unknowns=0
scaffold_10	Conpu1	exon	637458	637688	100	+	.	ID=TRINITY_DN12674_c0_g1_i1.mrna1.exon1;Name=TRINITY_DN12674_c0_g1_i1;Parent=TRINITY_DN12674_c0_g1_i1.mrna1;Target=TRINITY_DN12674_c0_g1_i1 232 2 .
scaffold_10	Conpu1	gene	637458	637688	.	+	.	ID=TRINITY_DN12674_c0_g1_i1.path1;Name=TRINITY_DN12674_c0_g1_i1
scaffold_10	Conpu1	mRNA	637458	637688	.	+	.	ID=TRINITY_DN12674_c0_g1_i1.mrna1;Name=TRINITY_DN12674_c0_g1_i1;Parent=TRINITY_DN12674_c0_g1_i1.path1;coverage=99.6;identity=100.0;matches=231;mismatches=0;indels=0;unknowns=0
scaffold_10	Conpu1	CDS	637544	637666	100	+	0	ID=TRINITY_DN12674_c0_g1_i1.mrna1.cds1;Name=TRINITY_DN12674_c0_g1_i1;Parent=TRINITY_DN12674_c0_g1_i1.mrna1;Target=TRINITY_DN12674_c0_g1_i1 210 88 .
scaffold_10	Conpu1	exon	651356	651530	100	-	.	ID=TRINITY_DN15639_c0_g1_i1.mrna1.exon3;Name=TRINITY_DN15639_c0_g1_i1;Parent=TRINITY_DN15639_c0_g1_i1.mrna1;Target=TRINITY_DN15639_c0_g1_i1 213 387 +
scaffold_10	Conpu1	gene	651356	651841	.	-	.	ID=TRINITY_DN15639_c0_g1_i1.path1;Name=TRINITY_DN15639_c0_g1_i1
scaffold_10	Conpu1	mRNA	651356	651841	.	-	.	ID=TRINITY_DN15639_c0_g1_i1.mrna1;Name=TRINITY_DN15639_c0_g1_i1;Parent=TRINITY_DN15639_c0_g1_i1.path1;coverage=100.0;identity=100.0;matches=387;mismatches=0;indels=0;unknowns=0
scaffold_10	Conpu1	exon	651578	651714	100	-	.	ID=TRINITY_DN15639_c0_g1_i1.mrna1.exon2;Name=TRINITY_DN15639_c0_g1_i1;Parent=TRINITY_DN15639_c0_g1_i1.mrna1;Target=TRINITY_DN15639_c0_g1_i1 76 212 +
scaffold_10	Conpu1	CDS	651685	651714	100	-	0	ID=TRINITY_DN15639_c0_g1_i1.mrna1.cds2;Name=TRINITY_DN15639_c0_g1_i1;Parent=TRINITY_DN15639_c0_g1_i1.mrna1;Target=TRINITY_DN15639_c0_g1_i1 76 105 +
scaffold_10	Conpu1	CDS	651767	651841	100	-	0	ID=TRINITY_DN15639_c0_g1_i1.mrna1.cds1;Name=TRINITY_DN15639_c0_g1_i1;Parent=TRINITY_DN15639_c0_g1_i1.mrna1;Target=TRINITY_DN15639_c0_g1_i1 1 75 +
scaffold_10	Conpu1	exon	651767	651841	100	-	.	ID=TRINITY_DN15639_c0_g1_i1.mrna1.exon1;Name=TRINITY_DN15639_c0_g1_i1;Parent=TRINITY_DN15639_c0_g1_i1.mrna1;Target=TRINITY_DN15639_c0_g1_i1 1 75 +
scaffold_10	Conpu1	exon	665074	665372	100	-	.	ID=TRINITY_DN16602_c0_g1_i1.mrna1.exon1;Name=TRINITY_DN16602_c0_g1_i1;Parent=TRINITY_DN16602_c0_g1_i1.mrna1;Target=TRINITY_DN16602_c0_g1_i1 299 1 .
scaffold_10	Conpu1	gene	665074	665372	.	-	.	ID=TRINITY_DN16602_c0_g1_i1.path1;Name=TRINITY_DN16602_c0_g1_i1
scaffold_10	Conpu1	mRNA	665074	665372	.	-	.	ID=TRINITY_DN16602_c0_g1_i1.mrna1;Name=TRINITY_DN16602_c0_g1_i1;Parent=TRINITY_DN16602_c0_g1_i1.path1;coverage=100.0;identity=100.0;matches=299;mismatches=0;indels=0;unknowns=0
scaffold_10	Conpu1	CDS	665238	665372	100	-	0	ID=TRINITY_DN16602_c0_g1_i1.mrna1.cds1;Name=TRINITY_DN16602_c0_g1_i1;Parent=TRINITY_DN16602_c0_g1_i1.mrna1;Target=TRINITY_DN16602_c0_g1_i1 135 1 .
scaffold_10	Conpu1	CDS	673368	673550	100	+	0	ID=TRINITY_DN729_c0_g1_i1.mrna1.cds1;Name=TRINITY_DN729_c0_g1_i1;Parent=TRINITY_DN729_c0_g1_i1.mrna1;Target=TRINITY_DN729_c0_g1_i1 399 581 .
scaffold_10	Conpu1	exon	673368	673588	100	+	.	ID=TRINITY_DN729_c0_g1_i1.mrna1.exon1;Name=TRINITY_DN729_c0_g1_i1;Parent=TRINITY_DN729_c0_g1_i1.mrna1;Target=TRINITY_DN729_c0_g1_i1 361 581 -
scaffold_10	Conpu1	gene	673368	674056	.	+	.	ID=TRINITY_DN729_c0_g1_i1.path1;Name=TRINITY_DN729_c0_g1_i1
scaffold_10	Conpu1	mRNA	673368	674056	.	+	.	ID=TRINITY_DN729_c0_g1_i1.mrna1;Name=TRINITY_DN729_c0_g1_i1;Parent=TRINITY_DN729_c0_g1_i1.path1;coverage=100.0;identity=100.0;matches=581;mismatches=0;indels=0;unknowns=0
scaffold_10	Conpu1	exon	673645	673961	100	+	.	ID=TRINITY_DN729_c0_g1_i1.mrna1.exon2;Name=TRINITY_DN729_c0_g1_i1;Parent=TRINITY_DN729_c0_g1_i1.mrna1;Target=TRINITY_DN729_c0_g1_i1 44 360 -
scaffold_10	Conpu1	exon	674014	674056	100	+	.	ID=TRINITY_DN729_c0_g1_i1.mrna1.exon3;Name=TRINITY_DN729_c0_g1_i1;Parent=TRINITY_DN729_c0_g1_i1.mrna1;Target=TRINITY_DN729_c0_g1_i1 1 43 -
scaffold_10	Conpu1	exon	692660	692886	99	+	.	ID=TRINITY_DN9224_c0_g1_i1.mrna1.exon1;Name=TRINITY_DN9224_c0_g1_i1;Parent=TRINITY_DN9224_c0_g1_i1.mrna1;Target=TRINITY_DN9224_c0_g1_i1 225 1 .
scaffold_10	Conpu1	gene	692660	692886	.	+	.	ID=TRINITY_DN9224_c0_g1_i1.path1;Name=TRINITY_DN9224_c0_g1_i1
scaffold_10	Conpu1	mRNA	692660	692886	.	+	.	ID=TRINITY_DN9224_c0_g1_i1.mrna1;Name=TRINITY_DN9224_c0_g1_i1;Parent=TRINITY_DN9224_c0_g1_i1.path1;coverage=99.6;identity=99.1;matches=225;mismatches=0;indels=2;unknowns=0
scaffold_10	Conpu1	CDS	692789	692880	97	+	0	ID=TRINITY_DN9224_c0_g1_i1.mrna1.cds1;Name=TRINITY_DN9224_c0_g1_i1;Parent=TRINITY_DN9224_c0_g1_i1.mrna1;Target=TRINITY_DN9224_c0_g1_i1 219 130 .
scaffold_10	Conpu1	exon	703207	703750	100	+	.	ID=TRINITY_DN15729_c0_g1_i1.mrna1.exon1;Name=TRINITY_DN15729_c0_g1_i1;Parent=TRINITY_DN15729_c0_g1_i1.mrna1;Target=TRINITY_DN15729_c0_g1_i1 544 1 .
scaffold_10	Conpu1	gene	703207	703750	.	+	.	ID=TRINITY_DN15729_c0_g1_i1.path1;Name=TRINITY_DN15729_c0_g1_i1
scaffold_10	Conpu1	mRNA	703207	703750	.	+	.	ID=TRINITY_DN15729_c0_g1_i1.mrna1;Name=TRINITY_DN15729_c0_g1_i1;Parent=TRINITY_DN15729_c0_g1_i1.path1;coverage=100.0;identity=100.0;matches=544;mismatches=0;indels=0;unknowns=0
scaffold_10	Conpu1	CDS	703209	703625	100	+	0	ID=TRINITY_DN15729_c0_g1_i1.mrna1.cds1;Name=TRINITY_DN15729_c0_g1_i1;Parent=TRINITY_DN15729_c0_g1_i1.mrna1;Target=TRINITY_DN15729_c0_g1_i1 419 3 .
scaffold_10	Conpu1	CDS	712532	712660	100	+	0	ID=TRINITY_DN11475_c0_g1_i1.mrna1.cds1;Name=TRINITY_DN11475_c0_g1_i1;Parent=TRINITY_DN11475_c0_g1_i1.mrna1;Target=TRINITY_DN11475_c0_g1_i1 141 13 .
scaffold_10	Conpu1	exon	712532	712743	100	+	.	ID=TRINITY_DN11475_c0_g1_i1.mrna1.exon1;Name=TRINITY_DN11475_c0_g1_i1;Parent=TRINITY_DN11475_c0_g1_i1.mrna1;Target=TRINITY_DN11475_c0_g1_i1 224 13 .
scaffold_10	Conpu1	gene	712532	712743	.	+	.	ID=TRINITY_DN11475_c0_g1_i1.path1;Name=TRINITY_DN11475_c0_g1_i1
scaffold_10	Conpu1	mRNA	712532	712743	.	+	.	ID=TRINITY_DN11475_c0_g1_i1.mrna1;Name=TRINITY_DN11475_c0_g1_i1;Parent=TRINITY_DN11475_c0_g1_i1.path1;coverage=94.6;identity=100.0;matches=212;mismatches=0;indels=0;unknowns=0
scaffold_10	Conpu1	exon	720828	721298	100	-	.	ID=TRINITY_DN10152_c0_g1_i1.mrna1.exon1;Name=TRINITY_DN10152_c0_g1_i1;Parent=TRINITY_DN10152_c0_g1_i1.mrna1;Target=TRINITY_DN10152_c0_g1_i1 471 1 .
scaffold_10	Conpu1	gene	720828	721298	.	-	.	ID=TRINITY_DN10152_c0_g1_i1.path1;Name=TRINITY_DN10152_c0_g1_i1
scaffold_10	Conpu1	mRNA	720828	721298	.	-	.	ID=TRINITY_DN10152_c0_g1_i1.mrna1;Name=TRINITY_DN10152_c0_g1_i1;Parent=TRINITY_DN10152_c0_g1_i1.path1;coverage=100.0;identity=100.0;matches=471;mismatches=0;indels=0;unknowns=0
scaffold_10	Conpu1	CDS	721088	721297	100	-	0	ID=TRINITY_DN10152_c0_g1_i1.mrna1.cds1;Name=TRINITY_DN10152_c0_g1_i1;Parent=TRINITY_DN10152_c0_g1_i1.mrna1;Target=TRINITY_DN10152_c0_g1_i1 211 2 .
scaffold_10	Conpu1	exon	721280	721519	100	+	.	ID=TRINITY_DN9440_c0_g1_i1.mrna1.exon1;Name=TRINITY_DN9440_c0_g1_i1;Parent=TRINITY_DN9440_c0_g1_i1.mrna1;Target=TRINITY_DN9440_c0_g1_i1 240 1 .
scaffold_10	Conpu1	gene	721280	721519	.	+	.	ID=TRINITY_DN9440_c0_g1_i1.path1;Name=TRINITY_DN9440_c0_g1_i1
scaffold_10	Conpu1	mRNA	721280	721519	.	+	.	ID=TRINITY_DN9440_c0_g1_i1.mrna1;Name=TRINITY_DN9440_c0_g1_i1;Parent=TRINITY_DN9440_c0_g1_i1.path1;coverage=100.0;identity=100.0;matches=240;mismatches=0;indels=0;unknowns=0
scaffold_10	Conpu1	CDS	721281	721451	100	+	0	ID=TRINITY_DN9440_c0_g1_i1.mrna1.cds1;Name=TRINITY_DN9440_c0_g1_i1;Parent=TRINITY_DN9440_c0_g1_i1.mrna1;Target=TRINITY_DN9440_c0_g1_i1 172 2 .
scaffold_10	Conpu1	exon	721499	721927	100	-	.	ID=TRINITY_DN16064_c0_g1_i1.mrna1.exon1;Name=TRINITY_DN16064_c0_g1_i1;Parent=TRINITY_DN16064_c0_g1_i1.mrna1;Target=TRINITY_DN16064_c0_g1_i1 429 1 .
scaffold_10	Conpu1	gene	721499	721927	.	-	.	ID=TRINITY_DN16064_c0_g1_i1.path1;Name=TRINITY_DN16064_c0_g1_i1
scaffold_10	Conpu1	mRNA	721499	721927	.	-	.	ID=TRINITY_DN16064_c0_g1_i1.mrna1;Name=TRINITY_DN16064_c0_g1_i1;Parent=TRINITY_DN16064_c0_g1_i1.path1;coverage=100.0;identity=100.0;matches=429;mismatches=0;indels=0;unknowns=0
scaffold_10	Conpu1	CDS	721668	721925	100	-	0	ID=TRINITY_DN16064_c0_g1_i1.mrna1.cds1;Name=TRINITY_DN16064_c0_g1_i1;Parent=TRINITY_DN16064_c0_g1_i1.mrna1;Target=TRINITY_DN16064_c0_g1_i1 260 3 .
scaffold_10	Conpu1	exon	722730	722934	100	+	.	ID=TRINITY_DN9666_c0_g1_i1.mrna1.exon1;Name=TRINITY_DN9666_c0_g1_i1;Parent=TRINITY_DN9666_c0_g1_i1.mrna1;Target=TRINITY_DN9666_c0_g1_i1 2 206 +
scaffold_10	Conpu1	gene	722730	723056	.	+	.	ID=TRINITY_DN9666_c0_g1_i1.path1;Name=TRINITY_DN9666_c0_g1_i1
scaffold_10	Conpu1	mRNA	722730	723056	.	+	.	ID=TRINITY_DN9666_c0_g1_i1.mrna1;Name=TRINITY_DN9666_c0_g1_i1;Parent=TRINITY_DN9666_c0_g1_i1.path1;coverage=99.6;identity=100.0;matches=267;mismatches=0;indels=0;unknowns=0
scaffold_10	Conpu1	CDS	722732	722854	100	+	0	ID=TRINITY_DN9666_c0_g1_i1.mrna1.cds1;Name=TRINITY_DN9666_c0_g1_i1;Parent=TRINITY_DN9666_c0_g1_i1.mrna1;Target=TRINITY_DN9666_c0_g1_i1 4 126 +
scaffold_10	Conpu1	exon	722995	723056	100	+	.	ID=TRINITY_DN9666_c0_g1_i1.mrna1.exon2;Name=TRINITY_DN9666_c0_g1_i1;Parent=TRINITY_DN9666_c0_g1_i1.mrna1;Target=TRINITY_DN9666_c0_g1_i1 207 268 +
scaffold_10	Conpu1	exon	723226	723792	100	-	.	ID=TRINITY_DN12428_c0_g1_i1.mrna1.exon1;Name=TRINITY_DN12428_c0_g1_i1;Parent=TRINITY_DN12428_c0_g1_i1.mrna1;Target=TRINITY_DN12428_c0_g1_i1 582 16 .
scaffold_10	Conpu1	gene	723226	723792	.	-	.	ID=TRINITY_DN12428_c0_g1_i1.path1;Name=TRINITY_DN12428_c0_g1_i1
scaffold_10	Conpu1	mRNA	723226	723792	.	-	.	ID=TRINITY_DN12428_c0_g1_i1.mrna1;Name=TRINITY_DN12428_c0_g1_i1;Parent=TRINITY_DN12428_c0_g1_i1.path1;coverage=97.4;identity=100.0;matches=567;mismatches=0;indels=0;unknowns=0
scaffold_10	Conpu1	CDS	723503	723679	100	-	0	ID=TRINITY_DN12428_c0_g1_i1.mrna1.cds1;Name=TRINITY_DN12428_c0_g1_i1;Parent=TRINITY_DN12428_c0_g1_i1.mrna1;Target=TRINITY_DN12428_c0_g1_i1 305 129 .
scaffold_10	Conpu1	exon	723772	724174	100	+	.	ID=TRINITY_DN628_c0_g1_i2.mrna1.exon1;Name=TRINITY_DN628_c0_g1_i2;Parent=TRINITY_DN628_c0_g1_i2.mrna1;Target=TRINITY_DN628_c0_g1_i2 1 403 +
scaffold_10	Conpu1	gene	723772	724564	.	+	.	ID=TRINITY_DN628_c0_g1_i2.path1;Name=TRINITY_DN628_c0_g1_i2
scaffold_10	Conpu1	mRNA	723772	724564	.	+	.	ID=TRINITY_DN628_c0_g1_i2.mrna1;Name=TRINITY_DN628_c0_g1_i2;Parent=TRINITY_DN628_c0_g1_i2.path1;coverage=99.9;identity=100.0;matches=734;mismatches=0;indels=0;unknowns=0
scaffold_10	Conpu1	CDS	723832	724137	100	+	0	ID=TRINITY_DN628_c0_g1_i2.mrna1.cds1;Name=TRINITY_DN628_c0_g1_i2;Parent=TRINITY_DN628_c0_g1_i2.mrna1;Target=TRINITY_DN628_c0_g1_i2 61 366 +
scaffold_10	Conpu1	exon	724074	724174	100	+	.	ID=TRINITY_DN628_c0_g1_i1.mrna1.exon1;Name=TRINITY_DN628_c0_g1_i1;Parent=TRINITY_DN628_c0_g1_i1.mrna1;Target=TRINITY_DN628_c0_g1_i1 14 114 +
scaffold_10	Conpu1	gene	724074	724564	.	+	.	ID=TRINITY_DN628_c0_g1_i1.path1;Name=TRINITY_DN628_c0_g1_i1
scaffold_10	Conpu1	mRNA	724074	724564	.	+	.	ID=TRINITY_DN628_c0_g1_i1.mrna1;Name=TRINITY_DN628_c0_g1_i1;Parent=TRINITY_DN628_c0_g1_i1.path1;coverage=96.9;identity=100.0;matches=432;mismatches=0;indels=0;unknowns=0
scaffold_10	Conpu1	CDS	724076	724174	100	+	0	ID=TRINITY_DN628_c0_g1_i1.mrna1.cds1;Name=TRINITY_DN628_c0_g1_i1;Parent=TRINITY_DN628_c0_g1_i1.mrna1;Target=TRINITY_DN628_c0_g1_i1 16 114 +
scaffold_10	Conpu1	CDS	724234	724323	100	+	0	ID=TRINITY_DN628_c0_g1_i1.mrna1.cds2;Name=TRINITY_DN628_c0_g1_i1;Parent=TRINITY_DN628_c0_g1_i1.mrna1;Target=TRINITY_DN628_c0_g1_i1 115 204 +
scaffold_10	Conpu1	exon	724234	724564	100	+	.	ID=TRINITY_DN628_c0_g1_i1.mrna1.exon2;Name=TRINITY_DN628_c0_g1_i1;Parent=TRINITY_DN628_c0_g1_i1.mrna1;Target=TRINITY_DN628_c0_g1_i1 115 445 +
scaffold_10	Conpu1	exon	724234	724564	100	+	.	ID=TRINITY_DN628_c0_g1_i2.mrna1.exon2;Name=TRINITY_DN628_c0_g1_i2;Parent=TRINITY_DN628_c0_g1_i2.mrna1;Target=TRINITY_DN628_c0_g1_i2 404 734 +
scaffold_10	Conpu1	exon	741669	742016	100	+	.	ID=TRINITY_DN12135_c0_g1_i1.mrna1.exon1;Name=TRINITY_DN12135_c0_g1_i1;Parent=TRINITY_DN12135_c0_g1_i1.mrna1;Target=TRINITY_DN12135_c0_g1_i1 348 1 .
scaffold_10	Conpu1	gene	741669	742016	.	+	.	ID=TRINITY_DN12135_c0_g1_i1.path1;Name=TRINITY_DN12135_c0_g1_i1
scaffold_10	Conpu1	mRNA	741669	742016	.	+	.	ID=TRINITY_DN12135_c0_g1_i1.mrna1;Name=TRINITY_DN12135_c0_g1_i1;Parent=TRINITY_DN12135_c0_g1_i1.path1;coverage=100.0;identity=100.0;matches=348;mismatches=0;indels=0;unknowns=0
scaffold_10	Conpu1	CDS	741672	741797	100	+	0	ID=TRINITY_DN12135_c0_g1_i1.mrna1.cds1;Name=TRINITY_DN12135_c0_g1_i1;Parent=TRINITY_DN12135_c0_g1_i1.mrna1;Target=TRINITY_DN12135_c0_g1_i1 129 4 .
scaffold_10	Conpu1	exon	801135	801376	100	-	.	ID=TRINITY_DN10025_c0_g1_i1.mrna1.exon1;Name=TRINITY_DN10025_c0_g1_i1;Parent=TRINITY_DN10025_c0_g1_i1.mrna1;Target=TRINITY_DN10025_c0_g1_i1 242 1 .
scaffold_10	Conpu1	gene	801135	801376	.	-	.	ID=TRINITY_DN10025_c0_g1_i1.path1;Name=TRINITY_DN10025_c0_g1_i1
scaffold_10	Conpu1	mRNA	801135	801376	.	-	.	ID=TRINITY_DN10025_c0_g1_i1.mrna1;Name=TRINITY_DN10025_c0_g1_i1;Parent=TRINITY_DN10025_c0_g1_i1.path1;coverage=100.0;identity=100.0;matches=242;mismatches=0;indels=0;unknowns=0
scaffold_10	Conpu1	CDS	801137	801376	100	-	0	ID=TRINITY_DN10025_c0_g1_i1.mrna1.cds1;Name=TRINITY_DN10025_c0_g1_i1;Parent=TRINITY_DN10025_c0_g1_i1.mrna1;Target=TRINITY_DN10025_c0_g1_i1 240 1 .
scaffold_10	Conpu1	CDS	810534	810677	100	+	0	ID=TRINITY_DN6571_c0_g1_i1.mrna1.cds1;Name=TRINITY_DN6571_c0_g1_i1;Parent=TRINITY_DN6571_c0_g1_i1.mrna1;Target=TRINITY_DN6571_c0_g1_i1 144 1 .
scaffold_10	Conpu1	exon	810534	810687	100	+	.	ID=TRINITY_DN6571_c0_g1_i1.mrna1.exon1;Name=TRINITY_DN6571_c0_g1_i1;Parent=TRINITY_DN6571_c0_g1_i1.mrna1;Target=TRINITY_DN6571_c0_g1_i1 154 1 .
scaffold_10	Conpu1	gene	810534	810798	.	+	.	ID=TRINITY_DN6571_c0_g1_i1.path1;Name=TRINITY_DN6571_c0_g1_i1
scaffold_10	Conpu1	mRNA	810534	810798	.	+	.	ID=TRINITY_DN6571_c0_g1_i1.mrna1;Name=TRINITY_DN6571_c0_g1_i1;Parent=TRINITY_DN6571_c0_g1_i1.path1;coverage=100.0;identity=99.5;matches=218;mismatches=1;indels=0;unknowns=0
scaffold_10	Conpu1	exon	810734	810798	98	+	.	ID=TRINITY_DN6571_c0_g1_i1.mrna1.exon2;Name=TRINITY_DN6571_c0_g1_i1;Parent=TRINITY_DN6571_c0_g1_i1.mrna1;Target=TRINITY_DN6571_c0_g1_i1 219 155 .
scaffold_10	Conpu1	exon	824368	824636	100	+	.	ID=TRINITY_DN12155_c0_g1_i1.mrna1.exon1;Name=TRINITY_DN12155_c0_g1_i1;Parent=TRINITY_DN12155_c0_g1_i1.mrna1;Target=TRINITY_DN12155_c0_g1_i1 272 4 .
scaffold_10	Conpu1	gene	824368	824636	.	+	.	ID=TRINITY_DN12155_c0_g1_i1.path1;Name=TRINITY_DN12155_c0_g1_i1
scaffold_10	Conpu1	mRNA	824368	824636	.	+	.	ID=TRINITY_DN12155_c0_g1_i1.mrna1;Name=TRINITY_DN12155_c0_g1_i1;Parent=TRINITY_DN12155_c0_g1_i1.path1;coverage=98.9;identity=100.0;matches=269;mismatches=0;indels=0;unknowns=0
scaffold_10	Conpu1	CDS	824486	824635	100	+	0	ID=TRINITY_DN12155_c0_g1_i1.mrna1.cds1;Name=TRINITY_DN12155_c0_g1_i1;Parent=TRINITY_DN12155_c0_g1_i1.mrna1;Target=TRINITY_DN12155_c0_g1_i1 271 122 .
scaffold_10	Conpu1	exon	828102	828648	100	+	.	ID=TRINITY_DN8489_c0_g1_i1.mrna1.exon1;Name=TRINITY_DN8489_c0_g1_i1;Parent=TRINITY_DN8489_c0_g1_i1.mrna1;Target=TRINITY_DN8489_c0_g1_i1 547 1 .
scaffold_10	Conpu1	gene	828102	828648	.	+	.	ID=TRINITY_DN8489_c0_g1_i1.path1;Name=TRINITY_DN8489_c0_g1_i1
scaffold_10	Conpu1	mRNA	828102	828648	.	+	.	ID=TRINITY_DN8489_c0_g1_i1.mrna1;Name=TRINITY_DN8489_c0_g1_i1;Parent=TRINITY_DN8489_c0_g1_i1.path1;coverage=100.0;identity=100.0;matches=547;mismatches=0;indels=0;unknowns=0
scaffold_10	Conpu1	CDS	828261	828542	100	+	0	ID=TRINITY_DN8489_c0_g1_i1.mrna1.cds1;Name=TRINITY_DN8489_c0_g1_i1;Parent=TRINITY_DN8489_c0_g1_i1.mrna1;Target=TRINITY_DN8489_c0_g1_i1 441 160 .
scaffold_10	Conpu1	exon	828632	829203	100	-	.	ID=TRINITY_DN5586_c0_g1_i1.mrna1.exon1;Name=TRINITY_DN5586_c0_g1_i1;Parent=TRINITY_DN5586_c0_g1_i1.mrna1;Target=TRINITY_DN5586_c0_g1_i1 572 1 .
scaffold_10	Conpu1	gene	828632	829203	.	-	.	ID=TRINITY_DN5586_c0_g1_i1.path1;Name=TRINITY_DN5586_c0_g1_i1
scaffold_10	Conpu1	mRNA	828632	829203	.	-	.	ID=TRINITY_DN5586_c0_g1_i1.mrna1;Name=TRINITY_DN5586_c0_g1_i1;Parent=TRINITY_DN5586_c0_g1_i1.path1;coverage=100.0;identity=100.0;matches=572;mismatches=0;indels=0;unknowns=0
scaffold_10	Conpu1	CDS	828803	828910	100	-	0	ID=TRINITY_DN5586_c0_g1_i1.mrna1.cds1;Name=TRINITY_DN5586_c0_g1_i1;Parent=TRINITY_DN5586_c0_g1_i1.mrna1;Target=TRINITY_DN5586_c0_g1_i1 401 294 .
scaffold_10	Conpu1	exon	829789	830200	100	-	.	ID=TRINITY_DN6160_c0_g1_i1.mrna1.exon1;Name=TRINITY_DN6160_c0_g1_i1;Parent=TRINITY_DN6160_c0_g1_i1.mrna1;Target=TRINITY_DN6160_c0_g1_i1 412 1 .
scaffold_10	Conpu1	gene	829789	830200	.	-	.	ID=TRINITY_DN6160_c0_g1_i1.path1;Name=TRINITY_DN6160_c0_g1_i1
scaffold_10	Conpu1	mRNA	829789	830200	.	-	.	ID=TRINITY_DN6160_c0_g1_i1.mrna1;Name=TRINITY_DN6160_c0_g1_i1;Parent=TRINITY_DN6160_c0_g1_i1.path1;coverage=100.0;identity=100.0;matches=412;mismatches=0;indels=0;unknowns=0
scaffold_10	Conpu1	CDS	830078	830200	100	-	0	ID=TRINITY_DN6160_c0_g1_i1.mrna1.cds1;Name=TRINITY_DN6160_c0_g1_i1;Parent=TRINITY_DN6160_c0_g1_i1.mrna1;Target=TRINITY_DN6160_c0_g1_i1 123 1 .
scaffold_10	Conpu1	exon	830189	830658	100	+	.	ID=TRINITY_DN13775_c0_g1_i1.mrna1.exon1;Name=TRINITY_DN13775_c0_g1_i1;Parent=TRINITY_DN13775_c0_g1_i1.mrna1;Target=TRINITY_DN13775_c0_g1_i1 696 1165 -
scaffold_10	Conpu1	gene	830189	831464	.	+	.	ID=TRINITY_DN13775_c0_g1_i1.path1;Name=TRINITY_DN13775_c0_g1_i1
scaffold_10	Conpu1	mRNA	830189	831464	.	+	.	ID=TRINITY_DN13775_c0_g1_i1.mrna1;Name=TRINITY_DN13775_c0_g1_i1;Parent=TRINITY_DN13775_c0_g1_i1.path1;coverage=100.0;identity=100.0;matches=1165;mismatches=0;indels=0;unknowns=0
scaffold_10	Conpu1	CDS	830190	830525	100	+	0	ID=TRINITY_DN13775_c0_g1_i1.mrna1.cds1;Name=TRINITY_DN13775_c0_g1_i1;Parent=TRINITY_DN13775_c0_g1_i1.mrna1;Target=TRINITY_DN13775_c0_g1_i1 829 1164 .
scaffold_10	Conpu1	exon	830719	831059	100	+	.	ID=TRINITY_DN13775_c0_g1_i1.mrna1.exon2;Name=TRINITY_DN13775_c0_g1_i1;Parent=TRINITY_DN13775_c0_g1_i1.mrna1;Target=TRINITY_DN13775_c0_g1_i1 355 695 -
scaffold_10	Conpu1	exon	831111	831464	100	+	.	ID=TRINITY_DN13775_c0_g1_i1.mrna1.exon3;Name=TRINITY_DN13775_c0_g1_i1;Parent=TRINITY_DN13775_c0_g1_i1.mrna1;Target=TRINITY_DN13775_c0_g1_i1 1 354 -
scaffold_10	Conpu1	exon	835419	835662	100	+	.	ID=TRINITY_DN11148_c0_g1_i1.mrna1.exon1;Name=TRINITY_DN11148_c0_g1_i1;Parent=TRINITY_DN11148_c0_g1_i1.mrna1;Target=TRINITY_DN11148_c0_g1_i1 244 1 .
scaffold_10	Conpu1	gene	835419	835662	.	+	.	ID=TRINITY_DN11148_c0_g1_i1.path1;Name=TRINITY_DN11148_c0_g1_i1
scaffold_10	Conpu1	mRNA	835419	835662	.	+	.	ID=TRINITY_DN11148_c0_g1_i1.mrna1;Name=TRINITY_DN11148_c0_g1_i1;Parent=TRINITY_DN11148_c0_g1_i1.path1;coverage=100.0;identity=100.0;matches=244;mismatches=0;indels=0;unknowns=0
scaffold_10	Conpu1	CDS	835420	835470	100	+	0	ID=TRINITY_DN11148_c0_g1_i1.mrna1.cds1;Name=TRINITY_DN11148_c0_g1_i1;Parent=TRINITY_DN11148_c0_g1_i1.mrna1;Target=TRINITY_DN11148_c0_g1_i1 52 2 .
scaffold_10	Conpu1	exon	841653	841876	100	+	.	ID=TRINITY_DN14919_c0_g1_i1.mrna1.exon1;Name=TRINITY_DN14919_c0_g1_i1;Parent=TRINITY_DN14919_c0_g1_i1.mrna1;Target=TRINITY_DN14919_c0_g1_i1 224 1 .
scaffold_10	Conpu1	gene	841653	841876	.	+	.	ID=TRINITY_DN14919_c0_g1_i1.path1;Name=TRINITY_DN14919_c0_g1_i1
scaffold_10	Conpu1	mRNA	841653	841876	.	+	.	ID=TRINITY_DN14919_c0_g1_i1.mrna1;Name=TRINITY_DN14919_c0_g1_i1;Parent=TRINITY_DN14919_c0_g1_i1.path1;coverage=100.0;identity=100.0;matches=224;mismatches=0;indels=0;unknowns=0
scaffold_10	Conpu1	CDS	841655	841846	100	+	0	ID=TRINITY_DN14919_c0_g1_i1.mrna1.cds1;Name=TRINITY_DN14919_c0_g1_i1;Parent=TRINITY_DN14919_c0_g1_i1.mrna1;Target=TRINITY_DN14919_c0_g1_i1 194 3 .
scaffold_10	Conpu1	exon	844198	844436	100	-	.	ID=TRINITY_DN8150_c0_g1_i1.mrna1.exon1;Name=TRINITY_DN8150_c0_g1_i1;Parent=TRINITY_DN8150_c0_g1_i1.mrna1;Target=TRINITY_DN8150_c0_g1_i1 239 1 .
scaffold_10	Conpu1	gene	844198	844436	.	-	.	ID=TRINITY_DN8150_c0_g1_i1.path1;Name=TRINITY_DN8150_c0_g1_i1
scaffold_10	Conpu1	mRNA	844198	844436	.	-	.	ID=TRINITY_DN8150_c0_g1_i1.mrna1;Name=TRINITY_DN8150_c0_g1_i1;Parent=TRINITY_DN8150_c0_g1_i1.path1;coverage=100.0;identity=100.0;matches=239;mismatches=0;indels=0;unknowns=0
scaffold_10	Conpu1	CDS	844377	844436	100	-	0	ID=TRINITY_DN8150_c0_g1_i1.mrna1.cds1;Name=TRINITY_DN8150_c0_g1_i1;Parent=TRINITY_DN8150_c0_g1_i1.mrna1;Target=TRINITY_DN8150_c0_g1_i1 60 1 .
scaffold_10	Conpu1	exon	861123	861482	100	-	.	ID=TRINITY_DN7165_c0_g1_i1.mrna1.exon1;Name=TRINITY_DN7165_c0_g1_i1;Parent=TRINITY_DN7165_c0_g1_i1.mrna1;Target=TRINITY_DN7165_c0_g1_i1 360 1 .
scaffold_10	Conpu1	gene	861123	861482	.	-	.	ID=TRINITY_DN7165_c0_g1_i1.path1;Name=TRINITY_DN7165_c0_g1_i1
scaffold_10	Conpu1	mRNA	861123	861482	.	-	.	ID=TRINITY_DN7165_c0_g1_i1.mrna1;Name=TRINITY_DN7165_c0_g1_i1;Parent=TRINITY_DN7165_c0_g1_i1.path1;coverage=100.0;identity=100.0;matches=360;mismatches=0;indels=0;unknowns=0
scaffold_10	Conpu1	CDS	861215	861277	100	-	0	ID=TRINITY_DN7165_c0_g1_i1.mrna1.cds1;Name=TRINITY_DN7165_c0_g1_i1;Parent=TRINITY_DN7165_c0_g1_i1.mrna1;Target=TRINITY_DN7165_c0_g1_i1 268 206 .
scaffold_10	Conpu1	exon	861898	862510	100	+	.	ID=TRINITY_DN8670_c0_g1_i1.mrna1.exon1;Name=TRINITY_DN8670_c0_g1_i1;Parent=TRINITY_DN8670_c0_g1_i1.mrna1;Target=TRINITY_DN8670_c0_g1_i1 613 1 .
scaffold_10	Conpu1	gene	861898	862510	.	+	.	ID=TRINITY_DN8670_c0_g1_i1.path1;Name=TRINITY_DN8670_c0_g1_i1
scaffold_10	Conpu1	mRNA	861898	862510	.	+	.	ID=TRINITY_DN8670_c0_g1_i1.mrna1;Name=TRINITY_DN8670_c0_g1_i1;Parent=TRINITY_DN8670_c0_g1_i1.path1;coverage=100.0;identity=100.0;matches=613;mismatches=0;indels=0;unknowns=0
scaffold_10	Conpu1	CDS	861899	862174	100	+	0	ID=TRINITY_DN8670_c0_g1_i1.mrna1.cds1;Name=TRINITY_DN8670_c0_g1_i1;Parent=TRINITY_DN8670_c0_g1_i1.mrna1;Target=TRINITY_DN8670_c0_g1_i1 277 2 .
scaffold_10	Conpu1	exon	888475	888707	100	-	.	ID=TRINITY_DN4873_c0_g1_i1.mrna1.exon1;Name=TRINITY_DN4873_c0_g1_i1;Parent=TRINITY_DN4873_c0_g1_i1.mrna1;Target=TRINITY_DN4873_c0_g1_i1 233 1 .
scaffold_10	Conpu1	gene	888475	888707	.	-	.	ID=TRINITY_DN4873_c0_g1_i1.path1;Name=TRINITY_DN4873_c0_g1_i1
scaffold_10	Conpu1	mRNA	888475	888707	.	-	.	ID=TRINITY_DN4873_c0_g1_i1.mrna1;Name=TRINITY_DN4873_c0_g1_i1;Parent=TRINITY_DN4873_c0_g1_i1.path1;coverage=88.9;identity=100.0;matches=233;mismatches=0;indels=0;unknowns=0
scaffold_10	Conpu1	CDS	888477	888707	100	-	0	ID=TRINITY_DN4873_c0_g1_i1.mrna1.cds1;Name=TRINITY_DN4873_c0_g1_i1;Parent=TRINITY_DN4873_c0_g1_i1.mrna1;Target=TRINITY_DN4873_c0_g1_i1 231 1 .
scaffold_10	Conpu1	exon	895007	895220	100	-	.	ID=TRINITY_DN16724_c0_g1_i1.mrna1.exon1;Name=TRINITY_DN16724_c0_g1_i1;Parent=TRINITY_DN16724_c0_g1_i1.mrna1;Target=TRINITY_DN16724_c0_g1_i1 214 1 .
scaffold_10	Conpu1	gene	895007	895220	.	-	.	ID=TRINITY_DN16724_c0_g1_i1.path1;Name=TRINITY_DN16724_c0_g1_i1
scaffold_10	Conpu1	mRNA	895007	895220	.	-	.	ID=TRINITY_DN16724_c0_g1_i1.mrna1;Name=TRINITY_DN16724_c0_g1_i1;Parent=TRINITY_DN16724_c0_g1_i1.path1;coverage=100.0;identity=100.0;matches=214;mismatches=0;indels=0;unknowns=0
scaffold_10	Conpu1	CDS	895067	895219	100	-	0	ID=TRINITY_DN16724_c0_g1_i1.mrna1.cds1;Name=TRINITY_DN16724_c0_g1_i1;Parent=TRINITY_DN16724_c0_g1_i1.mrna1;Target=TRINITY_DN16724_c0_g1_i1 154 2 .
scaffold_10	Conpu1	exon	900907	900941	100	+	.	ID=TRINITY_DN13064_c0_g1_i1.mrna1.exon1;Name=TRINITY_DN13064_c0_g1_i1;Parent=TRINITY_DN13064_c0_g1_i1.mrna1;Target=TRINITY_DN13064_c0_g1_i1 1 35 +
scaffold_10	Conpu1	gene	900907	901286	.	+	.	ID=TRINITY_DN13064_c0_g1_i1.path1;Name=TRINITY_DN13064_c0_g1_i1
scaffold_10	Conpu1	mRNA	900907	901286	.	+	.	ID=TRINITY_DN13064_c0_g1_i1.mrna1;Name=TRINITY_DN13064_c0_g1_i1;Parent=TRINITY_DN13064_c0_g1_i1.path1;coverage=99.2;identity=100.0;matches=241;mismatches=0;indels=0;unknowns=0
scaffold_10	Conpu1	CDS	900909	900941	100	+	0	ID=TRINITY_DN13064_c0_g1_i1.mrna1.cds1;Name=TRINITY_DN13064_c0_g1_i1;Parent=TRINITY_DN13064_c0_g1_i1.mrna1;Target=TRINITY_DN13064_c0_g1_i1 3 35 +
scaffold_10	Conpu1	CDS	901081	901224	100	+	0	ID=TRINITY_DN13064_c0_g1_i1.mrna1.cds2;Name=TRINITY_DN13064_c0_g1_i1;Parent=TRINITY_DN13064_c0_g1_i1.mrna1;Target=TRINITY_DN13064_c0_g1_i1 36 179 +
scaffold_10	Conpu1	exon	901081	901286	100	+	.	ID=TRINITY_DN13064_c0_g1_i1.mrna1.exon2;Name=TRINITY_DN13064_c0_g1_i1;Parent=TRINITY_DN13064_c0_g1_i1.mrna1;Target=TRINITY_DN13064_c0_g1_i1 36 241 +
scaffold_10	Conpu1	exon	958332	958378	100	-	.	ID=TRINITY_DN7641_c0_g1_i1.mrna1.exon2;Name=TRINITY_DN7641_c0_g1_i1;Parent=TRINITY_DN7641_c0_g1_i1.mrna1;Target=TRINITY_DN7641_c0_g1_i1 1 47 -
scaffold_10	Conpu1	gene	958332	958607	.	-	.	ID=TRINITY_DN7641_c0_g1_i1.path1;Name=TRINITY_DN7641_c0_g1_i1
scaffold_10	Conpu1	mRNA	958332	958607	.	-	.	ID=TRINITY_DN7641_c0_g1_i1.mrna1;Name=TRINITY_DN7641_c0_g1_i1;Parent=TRINITY_DN7641_c0_g1_i1.path1;coverage=100.0;identity=100.0;matches=215;mismatches=0;indels=0;unknowns=0
scaffold_10	Conpu1	exon	958440	958607	100	-	.	ID=TRINITY_DN7641_c0_g1_i1.mrna1.exon1;Name=TRINITY_DN7641_c0_g1_i1;Parent=TRINITY_DN7641_c0_g1_i1.mrna1;Target=TRINITY_DN7641_c0_g1_i1 48 215 -
scaffold_10	Conpu1	CDS	958454	958606	100	-	0	ID=TRINITY_DN7641_c0_g1_i1.mrna1.cds1;Name=TRINITY_DN7641_c0_g1_i1;Parent=TRINITY_DN7641_c0_g1_i1.mrna1;Target=TRINITY_DN7641_c0_g1_i1 62 214 .
scaffold_10	Conpu1	exon	958705	958956	100	+	.	ID=TRINITY_DN12523_c0_g1_i1.mrna1.exon1;Name=TRINITY_DN12523_c0_g1_i1;Parent=TRINITY_DN12523_c0_g1_i1.mrna1;Target=TRINITY_DN12523_c0_g1_i1 252 1 .
scaffold_10	Conpu1	gene	958705	958956	.	+	.	ID=TRINITY_DN12523_c0_g1_i1.path1;Name=TRINITY_DN12523_c0_g1_i1
scaffold_10	Conpu1	mRNA	958705	958956	.	+	.	ID=TRINITY_DN12523_c0_g1_i1.mrna1;Name=TRINITY_DN12523_c0_g1_i1;Parent=TRINITY_DN12523_c0_g1_i1.path1;coverage=100.0;identity=100.0;matches=252;mismatches=0;indels=0;unknowns=0
scaffold_10	Conpu1	CDS	958707	958796	100	+	0	ID=TRINITY_DN12523_c0_g1_i1.mrna1.cds1;Name=TRINITY_DN12523_c0_g1_i1;Parent=TRINITY_DN12523_c0_g1_i1.mrna1;Target=TRINITY_DN12523_c0_g1_i1 92 3 .
scaffold_10	Conpu1	exon	958963	959188	100	+	.	ID=TRINITY_DN12732_c0_g1_i1.mrna1.exon1;Name=TRINITY_DN12732_c0_g1_i1;Parent=TRINITY_DN12732_c0_g1_i1.mrna1;Target=TRINITY_DN12732_c0_g1_i1 226 1 .
scaffold_10	Conpu1	gene	958963	959188	.	+	.	ID=TRINITY_DN12732_c0_g1_i1.path1;Name=TRINITY_DN12732_c0_g1_i1
scaffold_10	Conpu1	mRNA	958963	959188	.	+	.	ID=TRINITY_DN12732_c0_g1_i1.mrna1;Name=TRINITY_DN12732_c0_g1_i1;Parent=TRINITY_DN12732_c0_g1_i1.path1;coverage=100.0;identity=100.0;matches=226;mismatches=0;indels=0;unknowns=0
scaffold_10	Conpu1	CDS	958965	959186	100	+	0	ID=TRINITY_DN12732_c0_g1_i1.mrna1.cds1;Name=TRINITY_DN12732_c0_g1_i1;Parent=TRINITY_DN12732_c0_g1_i1.mrna1;Target=TRINITY_DN12732_c0_g1_i1 224 3 .
scaffold_10	Conpu1	exon	1001636	1001937	100	-	.	ID=TRINITY_DN12922_c0_g1_i1.mrna1.exon1;Name=TRINITY_DN12922_c0_g1_i1;Parent=TRINITY_DN12922_c0_g1_i1.mrna1;Target=TRINITY_DN12922_c0_g1_i1 302 1 .
scaffold_10	Conpu1	gene	1001636	1001937	.	-	.	ID=TRINITY_DN12922_c0_g1_i1.path1;Name=TRINITY_DN12922_c0_g1_i1
scaffold_10	Conpu1	mRNA	1001636	1001937	.	-	.	ID=TRINITY_DN12922_c0_g1_i1.mrna1;Name=TRINITY_DN12922_c0_g1_i1;Parent=TRINITY_DN12922_c0_g1_i1.path1;coverage=100.0;identity=100.0;matches=302;mismatches=0;indels=0;unknowns=0
scaffold_10	Conpu1	CDS	1001739	1001936	100	-	0	ID=TRINITY_DN12922_c0_g1_i1.mrna1.cds1;Name=TRINITY_DN12922_c0_g1_i1;Parent=TRINITY_DN12922_c0_g1_i1.mrna1;Target=TRINITY_DN12922_c0_g1_i1 199 2 .
scaffold_10	Conpu1	exon	1003358	1003580	99	+	.	ID=TRINITY_DN3195_c1_g1_i1.mrna1.exon1;Name=TRINITY_DN3195_c1_g1_i1;Parent=TRINITY_DN3195_c1_g1_i1.mrna1;Target=TRINITY_DN3195_c1_g1_i1 223 1 .
scaffold_10	Conpu1	gene	1003358	1003580	.	+	.	ID=TRINITY_DN3195_c1_g1_i1.path1;Name=TRINITY_DN3195_c1_g1_i1
scaffold_10	Conpu1	mRNA	1003358	1003580	.	+	.	ID=TRINITY_DN3195_c1_g1_i1.mrna1;Name=TRINITY_DN3195_c1_g1_i1;Parent=TRINITY_DN3195_c1_g1_i1.path1;coverage=100.0;identity=99.6;matches=222;mismatches=1;indels=0;unknowns=0
scaffold_10	Conpu1	CDS	1003432	1003578	99	+	0	ID=TRINITY_DN3195_c1_g1_i1.mrna1.cds1;Name=TRINITY_DN3195_c1_g1_i1;Parent=TRINITY_DN3195_c1_g1_i1.mrna1;Target=TRINITY_DN3195_c1_g1_i1 221 75 .
scaffold_10	Conpu1	exon	1017493	1017979	100	-	.	ID=TRINITY_DN9994_c0_g1_i1.mrna1.exon1;Name=TRINITY_DN9994_c0_g1_i1;Parent=TRINITY_DN9994_c0_g1_i1.mrna1;Target=TRINITY_DN9994_c0_g1_i1 487 1 .
scaffold_10	Conpu1	gene	1017493	1017979	.	-	.	ID=TRINITY_DN9994_c0_g1_i1.path1;Name=TRINITY_DN9994_c0_g1_i1
scaffold_10	Conpu1	mRNA	1017493	1017979	.	-	.	ID=TRINITY_DN9994_c0_g1_i1.mrna1;Name=TRINITY_DN9994_c0_g1_i1;Parent=TRINITY_DN9994_c0_g1_i1.path1;coverage=100.0;identity=100.0;matches=487;mismatches=0;indels=0;unknowns=0
scaffold_10	Conpu1	CDS	1017896	1017979	100	-	0	ID=TRINITY_DN9994_c0_g1_i1.mrna1.cds1;Name=TRINITY_DN9994_c0_g1_i1;Parent=TRINITY_DN9994_c0_g1_i1.mrna1;Target=TRINITY_DN9994_c0_g1_i1 84 1 .
scaffold_10	Conpu1	exon	1017962	1018205	100	-	.	ID=TRINITY_DN6566_c0_g1_i1.mrna1.exon1;Name=TRINITY_DN6566_c0_g1_i1;Parent=TRINITY_DN6566_c0_g1_i1.mrna1;Target=TRINITY_DN6566_c0_g1_i1 244 1 .
scaffold_10	Conpu1	gene	1017962	1018205	.	-	.	ID=TRINITY_DN6566_c0_g1_i1.path1;Name=TRINITY_DN6566_c0_g1_i1
scaffold_10	Conpu1	mRNA	1017962	1018205	.	-	.	ID=TRINITY_DN6566_c0_g1_i1.mrna1;Name=TRINITY_DN6566_c0_g1_i1;Parent=TRINITY_DN6566_c0_g1_i1.path1;coverage=100.0;identity=100.0;matches=244;mismatches=0;indels=0;unknowns=0
scaffold_10	Conpu1	CDS	1018000	1018038	100	-	0	ID=TRINITY_DN6566_c0_g1_i1.mrna1.cds1;Name=TRINITY_DN6566_c0_g1_i1;Parent=TRINITY_DN6566_c0_g1_i1.mrna1;Target=TRINITY_DN6566_c0_g1_i1 206 168 .
scaffold_10	Conpu1	exon	1062821	1063042	100	+	.	ID=TRINITY_DN678_c1_g1_i1.mrna1.exon1;Name=TRINITY_DN678_c1_g1_i1;Parent=TRINITY_DN678_c1_g1_i1.mrna1;Target=TRINITY_DN678_c1_g1_i1 233 12 .
scaffold_10	Conpu1	gene	1062821	1063042	.	+	.	ID=TRINITY_DN678_c1_g1_i1.path1;Name=TRINITY_DN678_c1_g1_i1
scaffold_10	Conpu1	mRNA	1062821	1063042	.	+	.	ID=TRINITY_DN678_c1_g1_i1.mrna1;Name=TRINITY_DN678_c1_g1_i1;Parent=TRINITY_DN678_c1_g1_i1.path1;coverage=95.3;identity=100.0;matches=222;mismatches=0;indels=0;unknowns=0
scaffold_10	Conpu1	CDS	1062823	1062906	100	+	0	ID=TRINITY_DN678_c1_g1_i1.mrna1.cds1;Name=TRINITY_DN678_c1_g1_i1;Parent=TRINITY_DN678_c1_g1_i1.mrna1;Target=TRINITY_DN678_c1_g1_i1 97 14 .
scaffold_10	Conpu1	exon	1068271	1068555	100	+	.	ID=TRINITY_DN16539_c0_g1_i1.mrna1.exon1;Name=TRINITY_DN16539_c0_g1_i1;Parent=TRINITY_DN16539_c0_g1_i1.mrna1;Target=TRINITY_DN16539_c0_g1_i1 285 1 .
scaffold_10	Conpu1	gene	1068271	1068555	.	+	.	ID=TRINITY_DN16539_c0_g1_i1.path1;Name=TRINITY_DN16539_c0_g1_i1
scaffold_10	Conpu1	mRNA	1068271	1068555	.	+	.	ID=TRINITY_DN16539_c0_g1_i1.mrna1;Name=TRINITY_DN16539_c0_g1_i1;Parent=TRINITY_DN16539_c0_g1_i1.path1;coverage=100.0;identity=100.0;matches=285;mismatches=0;indels=0;unknowns=0
scaffold_10	Conpu1	CDS	1068385	1068555	100	+	0	ID=TRINITY_DN16539_c0_g1_i1.mrna1.cds1;Name=TRINITY_DN16539_c0_g1_i1;Parent=TRINITY_DN16539_c0_g1_i1.mrna1;Target=TRINITY_DN16539_c0_g1_i1 285 115 .
scaffold_10	Conpu1	exon	1077636	1077902	100	+	.	ID=TRINITY_DN12341_c0_g1_i1.mrna1.exon1;Name=TRINITY_DN12341_c0_g1_i1;Parent=TRINITY_DN12341_c0_g1_i1.mrna1;Target=TRINITY_DN12341_c0_g1_i1 267 1 .
scaffold_10	Conpu1	gene	1077636	1077902	.	+	.	ID=TRINITY_DN12341_c0_g1_i1.path1;Name=TRINITY_DN12341_c0_g1_i1
scaffold_10	Conpu1	mRNA	1077636	1077902	.	+	.	ID=TRINITY_DN12341_c0_g1_i1.mrna1;Name=TRINITY_DN12341_c0_g1_i1;Parent=TRINITY_DN12341_c0_g1_i1.path1;coverage=100.0;identity=100.0;matches=267;mismatches=0;indels=0;unknowns=0
scaffold_10	Conpu1	CDS	1077637	1077732	100	+	0	ID=TRINITY_DN12341_c0_g1_i1.mrna1.cds1;Name=TRINITY_DN12341_c0_g1_i1;Parent=TRINITY_DN12341_c0_g1_i1.mrna1;Target=TRINITY_DN12341_c0_g1_i1 97 2 .
scaffold_10	Conpu1	exon	1086285	1086475	100	-	.	ID=TRINITY_DN8260_c0_g1_i1.mrna1.exon2;Name=TRINITY_DN8260_c0_g1_i1;Parent=TRINITY_DN8260_c0_g1_i1.mrna1;Target=TRINITY_DN8260_c0_g1_i1 106 296 +
scaffold_10	Conpu1	gene	1086285	1086666	.	-	.	ID=TRINITY_DN8260_c0_g1_i1.path1;Name=TRINITY_DN8260_c0_g1_i1
scaffold_10	Conpu1	mRNA	1086285	1086666	.	-	.	ID=TRINITY_DN8260_c0_g1_i1.mrna1;Name=TRINITY_DN8260_c0_g1_i1;Parent=TRINITY_DN8260_c0_g1_i1.path1;coverage=100.0;identity=100.0;matches=296;mismatches=0;indels=0;unknowns=0
scaffold_10	Conpu1	CDS	1086286	1086465	100	-	0	ID=TRINITY_DN8260_c0_g1_i1.mrna1.cds1;Name=TRINITY_DN8260_c0_g1_i1;Parent=TRINITY_DN8260_c0_g1_i1.mrna1;Target=TRINITY_DN8260_c0_g1_i1 116 295 +
scaffold_10	Conpu1	exon	1086562	1086666	100	-	.	ID=TRINITY_DN8260_c0_g1_i1.mrna1.exon1;Name=TRINITY_DN8260_c0_g1_i1;Parent=TRINITY_DN8260_c0_g1_i1.mrna1;Target=TRINITY_DN8260_c0_g1_i1 1 105 +
scaffold_10	Conpu1	exon	1087660	1087691	100	+	.	ID=TRINITY_DN15401_c0_g1_i1.mrna1.exon1;Name=TRINITY_DN15401_c0_g1_i1;Parent=TRINITY_DN15401_c0_g1_i1.mrna1;Target=TRINITY_DN15401_c0_g1_i1 1 32 +
scaffold_10	Conpu1	gene	1087660	1088820	.	+	.	ID=TRINITY_DN15401_c0_g1_i1.path1;Name=TRINITY_DN15401_c0_g1_i1
scaffold_10	Conpu1	mRNA	1087660	1088820	.	+	.	ID=TRINITY_DN15401_c0_g1_i1.mrna1;Name=TRINITY_DN15401_c0_g1_i1;Parent=TRINITY_DN15401_c0_g1_i1.path1;coverage=100.0;identity=100.0;matches=990;mismatches=0;indels=0;unknowns=0
scaffold_10	Conpu1	exon	1087751	1088102	100	+	.	ID=TRINITY_DN15401_c0_g1_i1.mrna1.exon2;Name=TRINITY_DN15401_c0_g1_i1;Parent=TRINITY_DN15401_c0_g1_i1.mrna1;Target=TRINITY_DN15401_c0_g1_i1 33 384 +
scaffold_10	Conpu1	exon	1088160	1088731	100	+	.	ID=TRINITY_DN15401_c0_g1_i1.mrna1.exon3;Name=TRINITY_DN15401_c0_g1_i1;Parent=TRINITY_DN15401_c0_g1_i1.mrna1;Target=TRINITY_DN15401_c0_g1_i1 385 956 +
scaffold_10	Conpu1	CDS	1088480	1088731	100	+	0	ID=TRINITY_DN15401_c0_g1_i1.mrna1.cds1;Name=TRINITY_DN15401_c0_g1_i1;Parent=TRINITY_DN15401_c0_g1_i1.mrna1;Target=TRINITY_DN15401_c0_g1_i1 705 956 +
scaffold_10	Conpu1	CDS	1088787	1088789	100	+	0	ID=TRINITY_DN15401_c0_g1_i1.mrna1.cds2;Name=TRINITY_DN15401_c0_g1_i1;Parent=TRINITY_DN15401_c0_g1_i1.mrna1;Target=TRINITY_DN15401_c0_g1_i1 957 959 +
scaffold_10	Conpu1	exon	1088787	1088820	100	+	.	ID=TRINITY_DN15401_c0_g1_i1.mrna1.exon4;Name=TRINITY_DN15401_c0_g1_i1;Parent=TRINITY_DN15401_c0_g1_i1.mrna1;Target=TRINITY_DN15401_c0_g1_i1 957 990 +
scaffold_10	Conpu1	exon	1128815	1128829	100	+	.	ID=TRINITY_DN15556_c0_g1_i1.mrna1.exon1;Name=TRINITY_DN15556_c0_g1_i1;Parent=TRINITY_DN15556_c0_g1_i1.mrna1;Target=TRINITY_DN15556_c0_g1_i1 323 337 -
scaffold_10	Conpu1	gene	1128815	1129227	.	+	.	ID=TRINITY_DN15556_c0_g1_i1.path1;Name=TRINITY_DN15556_c0_g1_i1
scaffold_10	Conpu1	mRNA	1128815	1129227	.	+	.	ID=TRINITY_DN15556_c0_g1_i1.mrna1;Name=TRINITY_DN15556_c0_g1_i1;Parent=TRINITY_DN15556_c0_g1_i1.path1;coverage=100.0;identity=100.0;matches=337;mismatches=0;indels=0;unknowns=0
scaffold_10	Conpu1	exon	1128906	1129227	100	+	.	ID=TRINITY_DN15556_c0_g1_i1.mrna1.exon2;Name=TRINITY_DN15556_c0_g1_i1;Parent=TRINITY_DN15556_c0_g1_i1.mrna1;Target=TRINITY_DN15556_c0_g1_i1 1 322 -
scaffold_10	Conpu1	CDS	1128929	1129225	100	+	0	ID=TRINITY_DN15556_c0_g1_i1.mrna1.cds1;Name=TRINITY_DN15556_c0_g1_i1;Parent=TRINITY_DN15556_c0_g1_i1.mrna1;Target=TRINITY_DN15556_c0_g1_i1 3 299 .
scaffold_10	Conpu1	exon	1137827	1138215	100	+	.	ID=TRINITY_DN4599_c0_g1_i1.mrna1.exon1;Name=TRINITY_DN4599_c0_g1_i1;Parent=TRINITY_DN4599_c0_g1_i1.mrna1;Target=TRINITY_DN4599_c0_g1_i1 389 1 .
scaffold_10	Conpu1	gene	1137827	1138215	.	+	.	ID=TRINITY_DN4599_c0_g1_i1.path1;Name=TRINITY_DN4599_c0_g1_i1
scaffold_10	Conpu1	mRNA	1137827	1138215	.	+	.	ID=TRINITY_DN4599_c0_g1_i1.mrna1;Name=TRINITY_DN4599_c0_g1_i1;Parent=TRINITY_DN4599_c0_g1_i1.path1;coverage=100.0;identity=100.0;matches=389;mismatches=0;indels=0;unknowns=0
scaffold_10	Conpu1	CDS	1137954	1138214	100	+	0	ID=TRINITY_DN4599_c0_g1_i1.mrna1.cds1;Name=TRINITY_DN4599_c0_g1_i1;Parent=TRINITY_DN4599_c0_g1_i1.mrna1;Target=TRINITY_DN4599_c0_g1_i1 388 128 .
scaffold_10	Conpu1	exon	1146119	1146147	100	-	.	ID=TRINITY_DN16253_c0_g1_i1.mrna1.exon2;Name=TRINITY_DN16253_c0_g1_i1;Parent=TRINITY_DN16253_c0_g1_i1.mrna1;Target=TRINITY_DN16253_c0_g1_i1 1 29 -
scaffold_10	Conpu1	gene	1146119	1146440	.	-	.	ID=TRINITY_DN16253_c0_g1_i1.path1;Name=TRINITY_DN16253_c0_g1_i1
scaffold_10	Conpu1	mRNA	1146119	1146440	.	-	.	ID=TRINITY_DN16253_c0_g1_i1.mrna1;Name=TRINITY_DN16253_c0_g1_i1;Parent=TRINITY_DN16253_c0_g1_i1.path1;coverage=100.0;identity=100.0;matches=224;mismatches=0;indels=0;unknowns=0
scaffold_10	Conpu1	CDS	1146120	1146147	100	-	2	ID=TRINITY_DN16253_c0_g1_i1.mrna1.cds2;Name=TRINITY_DN16253_c0_g1_i1;Parent=TRINITY_DN16253_c0_g1_i1.mrna1;Target=TRINITY_DN16253_c0_g1_i1 2 29 .
scaffold_10	Conpu1	CDS	1146246	1146364	100	-	0	ID=TRINITY_DN16253_c0_g1_i1.mrna1.cds1;Name=TRINITY_DN16253_c0_g1_i1;Parent=TRINITY_DN16253_c0_g1_i1.mrna1;Target=TRINITY_DN16253_c0_g1_i1 30 148 .
scaffold_10	Conpu1	exon	1146246	1146440	100	-	.	ID=TRINITY_DN16253_c0_g1_i1.mrna1.exon1;Name=TRINITY_DN16253_c0_g1_i1;Parent=TRINITY_DN16253_c0_g1_i1.mrna1;Target=TRINITY_DN16253_c0_g1_i1 30 224 -
scaffold_10	Conpu1	exon	1164063	1164268	100	-	.	ID=TRINITY_DN16745_c0_g1_i1.mrna1.exon1;Name=TRINITY_DN16745_c0_g1_i1;Parent=TRINITY_DN16745_c0_g1_i1.mrna1;Target=TRINITY_DN16745_c0_g1_i1 206 1 .
scaffold_10	Conpu1	gene	1164063	1164268	.	-	.	ID=TRINITY_DN16745_c0_g1_i1.path1;Name=TRINITY_DN16745_c0_g1_i1
scaffold_10	Conpu1	mRNA	1164063	1164268	.	-	.	ID=TRINITY_DN16745_c0_g1_i1.mrna1;Name=TRINITY_DN16745_c0_g1_i1;Parent=TRINITY_DN16745_c0_g1_i1.path1;coverage=100.0;identity=100.0;matches=206;mismatches=0;indels=0;unknowns=0
scaffold_10	Conpu1	CDS	1164065	1164205	100	-	0	ID=TRINITY_DN16745_c0_g1_i1.mrna1.cds1;Name=TRINITY_DN16745_c0_g1_i1;Parent=TRINITY_DN16745_c0_g1_i1.mrna1;Target=TRINITY_DN16745_c0_g1_i1 204 64 .
scaffold_10	Conpu1	exon	1175959	1176527	100	-	.	ID=TRINITY_DN5928_c0_g1_i1.mrna1.exon1;Name=TRINITY_DN5928_c0_g1_i1;Parent=TRINITY_DN5928_c0_g1_i1.mrna1;Target=TRINITY_DN5928_c0_g1_i1 569 1 .
scaffold_10	Conpu1	gene	1175959	1176527	.	-	.	ID=TRINITY_DN5928_c0_g1_i1.path1;Name=TRINITY_DN5928_c0_g1_i1
scaffold_10	Conpu1	mRNA	1175959	1176527	.	-	.	ID=TRINITY_DN5928_c0_g1_i1.mrna1;Name=TRINITY_DN5928_c0_g1_i1;Parent=TRINITY_DN5928_c0_g1_i1.path1;coverage=100.0;identity=100.0;matches=569;mismatches=0;indels=0;unknowns=0
scaffold_10	Conpu1	CDS	1176302	1176469	100	-	0	ID=TRINITY_DN5928_c0_g1_i1.mrna1.cds1;Name=TRINITY_DN5928_c0_g1_i1;Parent=TRINITY_DN5928_c0_g1_i1.mrna1;Target=TRINITY_DN5928_c0_g1_i1 226 59 .
scaffold_10	Conpu1	exon	1180094	1180313	100	-	.	ID=TRINITY_DN9500_c0_g1_i1.mrna1.exon1;Name=TRINITY_DN9500_c0_g1_i1;Parent=TRINITY_DN9500_c0_g1_i1.mrna1;Target=TRINITY_DN9500_c0_g1_i1 220 1 .
scaffold_10	Conpu1	gene	1180094	1180313	.	-	.	ID=TRINITY_DN9500_c0_g1_i1.path1;Name=TRINITY_DN9500_c0_g1_i1
scaffold_10	Conpu1	mRNA	1180094	1180313	.	-	.	ID=TRINITY_DN9500_c0_g1_i1.mrna1;Name=TRINITY_DN9500_c0_g1_i1;Parent=TRINITY_DN9500_c0_g1_i1.path1;coverage=100.0;identity=100.0;matches=220;mismatches=0;indels=0;unknowns=0
scaffold_10	Conpu1	CDS	1180220	1180312	100	-	0	ID=TRINITY_DN9500_c0_g1_i1.mrna1.cds1;Name=TRINITY_DN9500_c0_g1_i1;Parent=TRINITY_DN9500_c0_g1_i1.mrna1;Target=TRINITY_DN9500_c0_g1_i1 94 2 .
scaffold_10	Conpu1	CDS	1188606	1188654	100	+	0	ID=TRINITY_DN3914_c0_g1_i1.mrna1.cds1;Name=TRINITY_DN3914_c0_g1_i1;Parent=TRINITY_DN3914_c0_g1_i1.mrna1;Target=TRINITY_DN3914_c0_g1_i1 167 215 .
scaffold_10	Conpu1	exon	1188606	1188654	100	+	.	ID=TRINITY_DN3914_c0_g1_i1.mrna1.exon1;Name=TRINITY_DN3914_c0_g1_i1;Parent=TRINITY_DN3914_c0_g1_i1.mrna1;Target=TRINITY_DN3914_c0_g1_i1 167 215 -
scaffold_10	Conpu1	gene	1188606	1188899	.	+	.	ID=TRINITY_DN3914_c0_g1_i1.path1;Name=TRINITY_DN3914_c0_g1_i1
scaffold_10	Conpu1	mRNA	1188606	1188899	.	+	.	ID=TRINITY_DN3914_c0_g1_i1.mrna1;Name=TRINITY_DN3914_c0_g1_i1;Parent=TRINITY_DN3914_c0_g1_i1.path1;coverage=100.0;identity=100.0;matches=215;mismatches=0;indels=0;unknowns=0
scaffold_10	Conpu1	CDS	1188734	1188840	100	+	1	ID=TRINITY_DN3914_c0_g1_i1.mrna1.cds2;Name=TRINITY_DN3914_c0_g1_i1;Parent=TRINITY_DN3914_c0_g1_i1.mrna1;Target=TRINITY_DN3914_c0_g1_i1 60 166 .
scaffold_10	Conpu1	exon	1188734	1188899	100	+	.	ID=TRINITY_DN3914_c0_g1_i1.mrna1.exon2;Name=TRINITY_DN3914_c0_g1_i1;Parent=TRINITY_DN3914_c0_g1_i1.mrna1;Target=TRINITY_DN3914_c0_g1_i1 1 166 -
scaffold_10	Conpu1	exon	1188887	1189128	100	+	.	ID=TRINITY_DN5256_c0_g1_i1.mrna1.exon1;Name=TRINITY_DN5256_c0_g1_i1;Parent=TRINITY_DN5256_c0_g1_i1.mrna1;Target=TRINITY_DN5256_c0_g1_i1 242 1 .
scaffold_10	Conpu1	gene	1188887	1189128	.	+	.	ID=TRINITY_DN5256_c0_g1_i1.path1;Name=TRINITY_DN5256_c0_g1_i1
scaffold_10	Conpu1	mRNA	1188887	1189128	.	+	.	ID=TRINITY_DN5256_c0_g1_i1.mrna1;Name=TRINITY_DN5256_c0_g1_i1;Parent=TRINITY_DN5256_c0_g1_i1.path1;coverage=100.0;identity=100.0;matches=242;mismatches=0;indels=0;unknowns=0
scaffold_10	Conpu1	CDS	1188929	1189126	100	+	0	ID=TRINITY_DN5256_c0_g1_i1.mrna1.cds1;Name=TRINITY_DN5256_c0_g1_i1;Parent=TRINITY_DN5256_c0_g1_i1.mrna1;Target=TRINITY_DN5256_c0_g1_i1 240 43 .
scaffold_10	Conpu1	CDS	1201976	1202325	99	+	0	ID=TRINITY_DN3442_c0_g1_i2.mrna1.cds1;Name=TRINITY_DN3442_c0_g1_i2;Parent=TRINITY_DN3442_c0_g1_i2.mrna1;Target=TRINITY_DN3442_c0_g1_i2 351 1 .
scaffold_10	Conpu1	exon	1201976	1202327	99	+	.	ID=TRINITY_DN3442_c0_g1_i2.mrna1.exon1;Name=TRINITY_DN3442_c0_g1_i2;Parent=TRINITY_DN3442_c0_g1_i2.mrna1;Target=TRINITY_DN3442_c0_g1_i2 353 1 .
scaffold_10	Conpu1	gene	1201976	1202327	.	+	.	ID=TRINITY_DN3442_c0_g1_i2.path1;Name=TRINITY_DN3442_c0_g1_i2
scaffold_10	Conpu1	mRNA	1201976	1202327	.	+	.	ID=TRINITY_DN3442_c0_g1_i2.mrna1;Name=TRINITY_DN3442_c0_g1_i2;Parent=TRINITY_DN3442_c0_g1_i2.path1;coverage=100.0;identity=99.7;matches=352;mismatches=0;indels=1;unknowns=0
scaffold_10	Conpu1	exon	1237755	1237988	100	-	.	ID=TRINITY_DN12646_c0_g1_i1.mrna1.exon1;Name=TRINITY_DN12646_c0_g1_i1;Parent=TRINITY_DN12646_c0_g1_i1.mrna1;Target=TRINITY_DN12646_c0_g1_i1 234 1 .
scaffold_10	Conpu1	gene	1237755	1237988	.	-	.	ID=TRINITY_DN12646_c0_g1_i1.path1;Name=TRINITY_DN12646_c0_g1_i1
scaffold_10	Conpu1	mRNA	1237755	1237988	.	-	.	ID=TRINITY_DN12646_c0_g1_i1.mrna1;Name=TRINITY_DN12646_c0_g1_i1;Parent=TRINITY_DN12646_c0_g1_i1.path1;coverage=100.0;identity=100.0;matches=234;mismatches=0;indels=0;unknowns=0
scaffold_10	Conpu1	CDS	1237824	1237928	100	-	0	ID=TRINITY_DN12646_c0_g1_i1.mrna1.cds1;Name=TRINITY_DN12646_c0_g1_i1;Parent=TRINITY_DN12646_c0_g1_i1.mrna1;Target=TRINITY_DN12646_c0_g1_i1 165 61 .
scaffold_10	Conpu1	exon	1268805	1269158	100	+	.	ID=TRINITY_DN2003_c1_g1_i1.mrna1.exon1;Name=TRINITY_DN2003_c1_g1_i1;Parent=TRINITY_DN2003_c1_g1_i1.mrna1;Target=TRINITY_DN2003_c1_g1_i1 1 354 +
scaffold_10	Conpu1	gene	1268805	1269500	.	+	.	ID=TRINITY_DN2003_c1_g1_i1.path1;Name=TRINITY_DN2003_c1_g1_i1
scaffold_10	Conpu1	mRNA	1268805	1269500	.	+	.	ID=TRINITY_DN2003_c1_g1_i1.mrna1;Name=TRINITY_DN2003_c1_g1_i1;Parent=TRINITY_DN2003_c1_g1_i1.path1;coverage=100.0;identity=100.0;matches=643;mismatches=0;indels=0;unknowns=0
scaffold_10	Conpu1	exon	1269212	1269500	100	+	.	ID=TRINITY_DN2003_c1_g1_i1.mrna1.exon2;Name=TRINITY_DN2003_c1_g1_i1;Parent=TRINITY_DN2003_c1_g1_i1.mrna1;Target=TRINITY_DN2003_c1_g1_i1 355 643 +
scaffold_10	Conpu1	CDS	1269320	1269436	100	+	0	ID=TRINITY_DN2003_c1_g1_i1.mrna1.cds1;Name=TRINITY_DN2003_c1_g1_i1;Parent=TRINITY_DN2003_c1_g1_i1.mrna1;Target=TRINITY_DN2003_c1_g1_i1 463 579 +
scaffold_10	Conpu1	exon	1273494	1273636	100	+	.	ID=TRINITY_DN14096_c0_g1_i1.mrna1.exon1;Name=TRINITY_DN14096_c0_g1_i1;Parent=TRINITY_DN14096_c0_g1_i1.mrna1;Target=TRINITY_DN14096_c0_g1_i1 297 439 -
scaffold_10	Conpu1	gene	1273494	1274039	.	+	.	ID=TRINITY_DN14096_c0_g1_i1.path1;Name=TRINITY_DN14096_c0_g1_i1
scaffold_10	Conpu1	mRNA	1273494	1274039	.	+	.	ID=TRINITY_DN14096_c0_g1_i1.mrna1;Name=TRINITY_DN14096_c0_g1_i1;Parent=TRINITY_DN14096_c0_g1_i1.path1;coverage=100.0;identity=100.0;matches=439;mismatches=0;indels=0;unknowns=0
scaffold_10	Conpu1	CDS	1273495	1273636	100	+	0	ID=TRINITY_DN14096_c0_g1_i1.mrna1.cds1;Name=TRINITY_DN14096_c0_g1_i1;Parent=TRINITY_DN14096_c0_g1_i1.mrna1;Target=TRINITY_DN14096_c0_g1_i1 297 438 .
scaffold_10	Conpu1	CDS	1273691	1273725	100	+	1	ID=TRINITY_DN14096_c0_g1_i1.mrna1.cds2;Name=TRINITY_DN14096_c0_g1_i1;Parent=TRINITY_DN14096_c0_g1_i1.mrna1;Target=TRINITY_DN14096_c0_g1_i1 262 296 .
scaffold_10	Conpu1	exon	1273691	1273731	100	+	.	ID=TRINITY_DN14096_c0_g1_i1.mrna1.exon2;Name=TRINITY_DN14096_c0_g1_i1;Parent=TRINITY_DN14096_c0_g1_i1.mrna1;Target=TRINITY_DN14096_c0_g1_i1 256 296 -
scaffold_10	Conpu1	exon	1273785	1274039	100	+	.	ID=TRINITY_DN14096_c0_g1_i1.mrna1.exon3;Name=TRINITY_DN14096_c0_g1_i1;Parent=TRINITY_DN14096_c0_g1_i1.mrna1;Target=TRINITY_DN14096_c0_g1_i1 1 255 -
scaffold_10	Conpu1	exon	1282529	1282663	100	+	.	ID=TRINITY_DN9186_c0_g1_i1.mrna1.exon1;Name=TRINITY_DN9186_c0_g1_i1;Parent=TRINITY_DN9186_c0_g1_i1.mrna1;Target=TRINITY_DN9186_c0_g1_i1 347 481 -
scaffold_10	Conpu1	gene	1282529	1283315	.	+	.	ID=TRINITY_DN9186_c0_g1_i1.path1;Name=TRINITY_DN9186_c0_g1_i1
scaffold_10	Conpu1	mRNA	1282529	1283315	.	+	.	ID=TRINITY_DN9186_c0_g1_i1.mrna1;Name=TRINITY_DN9186_c0_g1_i1;Parent=TRINITY_DN9186_c0_g1_i1.path1;coverage=100.0;identity=100.0;matches=481;mismatches=0;indels=0;unknowns=0
scaffold_10	Conpu1	exon	1282754	1282823	100	+	.	ID=TRINITY_DN9186_c0_g1_i1.mrna1.exon2;Name=TRINITY_DN9186_c0_g1_i1;Parent=TRINITY_DN9186_c0_g1_i1.mrna1;Target=TRINITY_DN9186_c0_g1_i1 277 346 -
scaffold_10	Conpu1	exon	1282879	1282985	100	+	.	ID=TRINITY_DN9186_c0_g1_i1.mrna1.exon3;Name=TRINITY_DN9186_c0_g1_i1;Parent=TRINITY_DN9186_c0_g1_i1.mrna1;Target=TRINITY_DN9186_c0_g1_i1 170 276 -
scaffold_10	Conpu1	CDS	1282935	1282985	100	+	0	ID=TRINITY_DN9186_c0_g1_i1.mrna1.cds1;Name=TRINITY_DN9186_c0_g1_i1;Parent=TRINITY_DN9186_c0_g1_i1.mrna1;Target=TRINITY_DN9186_c0_g1_i1 170 220 .
scaffold_10	Conpu1	CDS	1283036	1283061	100	+	0	ID=TRINITY_DN9186_c0_g1_i1.mrna1.cds2;Name=TRINITY_DN9186_c0_g1_i1;Parent=TRINITY_DN9186_c0_g1_i1.mrna1;Target=TRINITY_DN9186_c0_g1_i1 144 169 .
scaffold_10	Conpu1	exon	1283036	1283061	100	+	.	ID=TRINITY_DN9186_c0_g1_i1.mrna1.exon4;Name=TRINITY_DN9186_c0_g1_i1;Parent=TRINITY_DN9186_c0_g1_i1.mrna1;Target=TRINITY_DN9186_c0_g1_i1 144 169 -
scaffold_10	Conpu1	CDS	1283121	1283235	100	+	2	ID=TRINITY_DN9186_c0_g1_i1.mrna1.cds3;Name=TRINITY_DN9186_c0_g1_i1;Parent=TRINITY_DN9186_c0_g1_i1.mrna1;Target=TRINITY_DN9186_c0_g1_i1 29 143 .
scaffold_10	Conpu1	exon	1283121	1283235	100	+	.	ID=TRINITY_DN9186_c0_g1_i1.mrna1.exon5;Name=TRINITY_DN9186_c0_g1_i1;Parent=TRINITY_DN9186_c0_g1_i1.mrna1;Target=TRINITY_DN9186_c0_g1_i1 29 143 -
scaffold_10	Conpu1	CDS	1283288	1283293	100	+	0	ID=TRINITY_DN9186_c0_g1_i1.mrna1.cds4;Name=TRINITY_DN9186_c0_g1_i1;Parent=TRINITY_DN9186_c0_g1_i1.mrna1;Target=TRINITY_DN9186_c0_g1_i1 23 28 .
scaffold_10	Conpu1	exon	1283288	1283315	100	+	.	ID=TRINITY_DN9186_c0_g1_i1.mrna1.exon6;Name=TRINITY_DN9186_c0_g1_i1;Parent=TRINITY_DN9186_c0_g1_i1.mrna1;Target=TRINITY_DN9186_c0_g1_i1 1 28 -
scaffold_10	Conpu1	exon	1283490	1283604	100	-	.	ID=TRINITY_DN9784_c0_g1_i1.mrna1.exon3;Name=TRINITY_DN9784_c0_g1_i1;Parent=TRINITY_DN9784_c0_g1_i1.mrna1;Target=TRINITY_DN9784_c0_g1_i1 217 103 .
scaffold_10	Conpu1	gene	1283490	1283799	.	-	.	ID=TRINITY_DN9784_c0_g1_i1.path1;Name=TRINITY_DN9784_c0_g1_i1
scaffold_10	Conpu1	mRNA	1283490	1283799	.	-	.	ID=TRINITY_DN9784_c0_g1_i1.mrna1;Name=TRINITY_DN9784_c0_g1_i1;Parent=TRINITY_DN9784_c0_g1_i1.path1;coverage=100.0;identity=100.0;matches=217;mismatches=0;indels=0;unknowns=0
scaffold_10	Conpu1	exon	1283654	1283712	100	-	.	ID=TRINITY_DN9784_c0_g1_i1.mrna1.exon2;Name=TRINITY_DN9784_c0_g1_i1;Parent=TRINITY_DN9784_c0_g1_i1.mrna1;Target=TRINITY_DN9784_c0_g1_i1 102 44 .
scaffold_10	Conpu1	CDS	1283677	1283712	100	-	0	ID=TRINITY_DN9784_c0_g1_i1.mrna1.cds2;Name=TRINITY_DN9784_c0_g1_i1;Parent=TRINITY_DN9784_c0_g1_i1.mrna1;Target=TRINITY_DN9784_c0_g1_i1 79 44 .
scaffold_10	Conpu1	CDS	1283757	1283798	100	-	0	ID=TRINITY_DN9784_c0_g1_i1.mrna1.cds1;Name=TRINITY_DN9784_c0_g1_i1;Parent=TRINITY_DN9784_c0_g1_i1.mrna1;Target=TRINITY_DN9784_c0_g1_i1 43 2 .
scaffold_10	Conpu1	exon	1283757	1283799	100	-	.	ID=TRINITY_DN9784_c0_g1_i1.mrna1.exon1;Name=TRINITY_DN9784_c0_g1_i1;Parent=TRINITY_DN9784_c0_g1_i1.mrna1;Target=TRINITY_DN9784_c0_g1_i1 43 1 .
scaffold_10	Conpu1	exon	1287719	1287937	100	+	.	ID=TRINITY_DN6058_c0_g1_i1.mrna1.exon1;Name=TRINITY_DN6058_c0_g1_i1;Parent=TRINITY_DN6058_c0_g1_i1.mrna1;Target=TRINITY_DN6058_c0_g1_i1 219 1 .
scaffold_10	Conpu1	gene	1287719	1287937	.	+	.	ID=TRINITY_DN6058_c0_g1_i1.path1;Name=TRINITY_DN6058_c0_g1_i1
scaffold_10	Conpu1	mRNA	1287719	1287937	.	+	.	ID=TRINITY_DN6058_c0_g1_i1.mrna1;Name=TRINITY_DN6058_c0_g1_i1;Parent=TRINITY_DN6058_c0_g1_i1.path1;coverage=100.0;identity=100.0;matches=219;mismatches=0;indels=0;unknowns=0
scaffold_10	Conpu1	CDS	1287721	1287927	100	+	0	ID=TRINITY_DN6058_c0_g1_i1.mrna1.cds1;Name=TRINITY_DN6058_c0_g1_i1;Parent=TRINITY_DN6058_c0_g1_i1.mrna1;Target=TRINITY_DN6058_c0_g1_i1 209 3 .
scaffold_10	Conpu1	CDS	1293728	1293841	100	+	0	ID=TRINITY_DN4129_c0_g1_i1.mrna1.cds1;Name=TRINITY_DN4129_c0_g1_i1;Parent=TRINITY_DN4129_c0_g1_i1.mrna1;Target=TRINITY_DN4129_c0_g1_i1 114 1 .
scaffold_10	Conpu1	exon	1293728	1293956	100	+	.	ID=TRINITY_DN4129_c0_g1_i1.mrna1.exon1;Name=TRINITY_DN4129_c0_g1_i1;Parent=TRINITY_DN4129_c0_g1_i1.mrna1;Target=TRINITY_DN4129_c0_g1_i1 229 1 .
scaffold_10	Conpu1	gene	1293728	1293956	.	+	.	ID=TRINITY_DN4129_c0_g1_i1.path1;Name=TRINITY_DN4129_c0_g1_i1
scaffold_10	Conpu1	mRNA	1293728	1293956	.	+	.	ID=TRINITY_DN4129_c0_g1_i1.mrna1;Name=TRINITY_DN4129_c0_g1_i1;Parent=TRINITY_DN4129_c0_g1_i1.path1;coverage=100.0;identity=100.0;matches=229;mismatches=0;indels=0;unknowns=0
scaffold_10	Conpu1	exon	1295743	1296536	99	-	.	ID=TRINITY_DN10018_c0_g1_i1.mrna1.exon4;Name=TRINITY_DN10018_c0_g1_i1;Parent=TRINITY_DN10018_c0_g1_i1.mrna1;Target=TRINITY_DN10018_c0_g1_i1 510 1303 +
scaffold_10	Conpu1	gene	1295743	1297202	.	-	.	ID=TRINITY_DN10018_c0_g1_i1.path1;Name=TRINITY_DN10018_c0_g1_i1
scaffold_10	Conpu1	mRNA	1295743	1297202	.	-	.	ID=TRINITY_DN10018_c0_g1_i1.mrna1;Name=TRINITY_DN10018_c0_g1_i1;Parent=TRINITY_DN10018_c0_g1_i1.path1;coverage=99.8;identity=99.9;matches=1300;mismatches=1;indels=0;unknowns=0
scaffold_10	Conpu1	CDS	1296118	1296381	100	-	0	ID=TRINITY_DN10018_c0_g1_i1.mrna1.cds1;Name=TRINITY_DN10018_c0_g1_i1;Parent=TRINITY_DN10018_c0_g1_i1.mrna1;Target=TRINITY_DN10018_c0_g1_i1 665 928 +
scaffold_10	Conpu1	exon	1296587	1296700	100	-	.	ID=TRINITY_DN10018_c0_g1_i1.mrna1.exon3;Name=TRINITY_DN10018_c0_g1_i1;Parent=TRINITY_DN10018_c0_g1_i1.mrna1;Target=TRINITY_DN10018_c0_g1_i1 396 509 +
scaffold_10	Conpu1	exon	1296763	1296974	100	-	.	ID=TRINITY_DN10018_c0_g1_i1.mrna1.exon2;Name=TRINITY_DN10018_c0_g1_i1;Parent=TRINITY_DN10018_c0_g1_i1.mrna1;Target=TRINITY_DN10018_c0_g1_i1 184 395 +
scaffold_10	Conpu1	exon	1297022	1297202	100	-	.	ID=TRINITY_DN10018_c0_g1_i1.mrna1.exon1;Name=TRINITY_DN10018_c0_g1_i1;Parent=TRINITY_DN10018_c0_g1_i1.mrna1;Target=TRINITY_DN10018_c0_g1_i1 3 183 +
scaffold_10	Conpu1	exon	1297181	1297410	100	+	.	ID=TRINITY_DN12700_c0_g1_i1.mrna1.exon1;Name=TRINITY_DN12700_c0_g1_i1;Parent=TRINITY_DN12700_c0_g1_i1.mrna1;Target=TRINITY_DN12700_c0_g1_i1 230 1 .
scaffold_10	Conpu1	gene	1297181	1297410	.	+	.	ID=TRINITY_DN12700_c0_g1_i1.path1;Name=TRINITY_DN12700_c0_g1_i1
scaffold_10	Conpu1	mRNA	1297181	1297410	.	+	.	ID=TRINITY_DN12700_c0_g1_i1.mrna1;Name=TRINITY_DN12700_c0_g1_i1;Parent=TRINITY_DN12700_c0_g1_i1.path1;coverage=100.0;identity=100.0;matches=230;mismatches=0;indels=0;unknowns=0
scaffold_10	Conpu1	CDS	1297183	1297347	100	+	0	ID=TRINITY_DN12700_c0_g1_i1.mrna1.cds1;Name=TRINITY_DN12700_c0_g1_i1;Parent=TRINITY_DN12700_c0_g1_i1.mrna1;Target=TRINITY_DN12700_c0_g1_i1 167 3 .
scaffold_10	Conpu1	exon	1297744	1297837	98	-	.	ID=TRINITY_DN13039_c0_g1_i1.mrna1.exon2;Name=TRINITY_DN13039_c0_g1_i1;Parent=TRINITY_DN13039_c0_g1_i1.mrna1;Target=TRINITY_DN13039_c0_g1_i1 126 219 +
scaffold_10	Conpu1	gene	1297744	1298048	.	-	.	ID=TRINITY_DN13039_c0_g1_i1.path1;Name=TRINITY_DN13039_c0_g1_i1
scaffold_10	Conpu1	mRNA	1297744	1298048	.	-	.	ID=TRINITY_DN13039_c0_g1_i1.mrna1;Name=TRINITY_DN13039_c0_g1_i1;Parent=TRINITY_DN13039_c0_g1_i1.path1;coverage=100.0;identity=99.5;matches=218;mismatches=1;indels=0;unknowns=0
scaffold_10	Conpu1	CDS	1297745	1297837	98	-	0	ID=TRINITY_DN13039_c0_g1_i1.mrna1.cds2;Name=TRINITY_DN13039_c0_g1_i1;Parent=TRINITY_DN13039_c0_g1_i1.mrna1;Target=TRINITY_DN13039_c0_g1_i1 126 218 +
scaffold_10	Conpu1	CDS	1297924	1298046	100	-	0	ID=TRINITY_DN13039_c0_g1_i1.mrna1.cds1;Name=TRINITY_DN13039_c0_g1_i1;Parent=TRINITY_DN13039_c0_g1_i1.mrna1;Target=TRINITY_DN13039_c0_g1_i1 3 125 +
scaffold_10	Conpu1	exon	1297924	1298048	100	-	.	ID=TRINITY_DN13039_c0_g1_i1.mrna1.exon1;Name=TRINITY_DN13039_c0_g1_i1;Parent=TRINITY_DN13039_c0_g1_i1.mrna1;Target=TRINITY_DN13039_c0_g1_i1 1 125 +
scaffold_10	Conpu1	exon	1301240	1301508	100	+	.	ID=TRINITY_DN9568_c0_g1_i1.mrna1.exon1;Name=TRINITY_DN9568_c0_g1_i1;Parent=TRINITY_DN9568_c0_g1_i1.mrna1;Target=TRINITY_DN9568_c0_g1_i1 269 1 .
scaffold_10	Conpu1	gene	1301240	1301508	.	+	.	ID=TRINITY_DN9568_c0_g1_i1.path1;Name=TRINITY_DN9568_c0_g1_i1
scaffold_10	Conpu1	mRNA	1301240	1301508	.	+	.	ID=TRINITY_DN9568_c0_g1_i1.mrna1;Name=TRINITY_DN9568_c0_g1_i1;Parent=TRINITY_DN9568_c0_g1_i1.path1;coverage=96.8;identity=100.0;matches=269;mismatches=0;indels=0;unknowns=0
scaffold_10	Conpu1	CDS	1301241	1301435	100	+	0	ID=TRINITY_DN9568_c0_g1_i1.mrna1.cds1;Name=TRINITY_DN9568_c0_g1_i1;Parent=TRINITY_DN9568_c0_g1_i1.mrna1;Target=TRINITY_DN9568_c0_g1_i1 196 2 .
scaffold_10	Conpu1	CDS	1304632	1304702	100	+	0	ID=TRINITY_DN16592_c0_g1_i1.mrna1.cds1;Name=TRINITY_DN16592_c0_g1_i1;Parent=TRINITY_DN16592_c0_g1_i1.mrna1;Target=TRINITY_DN16592_c0_g1_i1 131 201 .
scaffold_10	Conpu1	exon	1304632	1304702	100	+	.	ID=TRINITY_DN16592_c0_g1_i1.mrna1.exon1;Name=TRINITY_DN16592_c0_g1_i1;Parent=TRINITY_DN16592_c0_g1_i1.mrna1;Target=TRINITY_DN16592_c0_g1_i1 131 201 -
scaffold_10	Conpu1	gene	1304632	1304901	.	+	.	ID=TRINITY_DN16592_c0_g1_i1.path1;Name=TRINITY_DN16592_c0_g1_i1
scaffold_10	Conpu1	mRNA	1304632	1304901	.	+	.	ID=TRINITY_DN16592_c0_g1_i1.mrna1;Name=TRINITY_DN16592_c0_g1_i1;Parent=TRINITY_DN16592_c0_g1_i1.path1;coverage=100.0;identity=100.0;matches=201;mismatches=0;indels=0;unknowns=0
scaffold_10	Conpu1	CDS	1304772	1304802	100	+	2	ID=TRINITY_DN16592_c0_g1_i1.mrna1.cds2;Name=TRINITY_DN16592_c0_g1_i1;Parent=TRINITY_DN16592_c0_g1_i1.mrna1;Target=TRINITY_DN16592_c0_g1_i1 100 130 .
scaffold_10	Conpu1	exon	1304772	1304901	100	+	.	ID=TRINITY_DN16592_c0_g1_i1.mrna1.exon2;Name=TRINITY_DN16592_c0_g1_i1;Parent=TRINITY_DN16592_c0_g1_i1.mrna1;Target=TRINITY_DN16592_c0_g1_i1 1 130 -
scaffold_10	Conpu1	exon	1304881	1305109	100	+	.	ID=TRINITY_DN5608_c0_g1_i1.mrna1.exon1;Name=TRINITY_DN5608_c0_g1_i1;Parent=TRINITY_DN5608_c0_g1_i1.mrna1;Target=TRINITY_DN5608_c0_g1_i1 229 1 .
scaffold_10	Conpu1	gene	1304881	1305109	.	+	.	ID=TRINITY_DN5608_c0_g1_i1.path1;Name=TRINITY_DN5608_c0_g1_i1
scaffold_10	Conpu1	mRNA	1304881	1305109	.	+	.	ID=TRINITY_DN5608_c0_g1_i1.mrna1;Name=TRINITY_DN5608_c0_g1_i1;Parent=TRINITY_DN5608_c0_g1_i1.path1;coverage=100.0;identity=100.0;matches=229;mismatches=0;indels=0;unknowns=0
scaffold_10	Conpu1	CDS	1304883	1304945	100	+	0	ID=TRINITY_DN5608_c0_g1_i1.mrna1.cds1;Name=TRINITY_DN5608_c0_g1_i1;Parent=TRINITY_DN5608_c0_g1_i1.mrna1;Target=TRINITY_DN5608_c0_g1_i1 65 3 .
scaffold_10	Conpu1	exon	1308347	1308605	100	+	.	ID=TRINITY_DN9930_c0_g1_i1.mrna1.exon1;Name=TRINITY_DN9930_c0_g1_i1;Parent=TRINITY_DN9930_c0_g1_i1.mrna1;Target=TRINITY_DN9930_c0_g1_i1 259 1 .
scaffold_10	Conpu1	gene	1308347	1308605	.	+	.	ID=TRINITY_DN9930_c0_g1_i1.path1;Name=TRINITY_DN9930_c0_g1_i1
scaffold_10	Conpu1	mRNA	1308347	1308605	.	+	.	ID=TRINITY_DN9930_c0_g1_i1.mrna1;Name=TRINITY_DN9930_c0_g1_i1;Parent=TRINITY_DN9930_c0_g1_i1.path1;coverage=100.0;identity=100.0;matches=259;mismatches=0;indels=0;unknowns=0
scaffold_10	Conpu1	CDS	1308348	1308425	100	+	0	ID=TRINITY_DN9930_c0_g1_i1.mrna1.cds1;Name=TRINITY_DN9930_c0_g1_i1;Parent=TRINITY_DN9930_c0_g1_i1.mrna1;Target=TRINITY_DN9930_c0_g1_i1 79 2 .
scaffold_10	Conpu1	exon	1308586	1308876	100	-	.	ID=TRINITY_DN12827_c0_g1_i1.mrna1.exon1;Name=TRINITY_DN12827_c0_g1_i1;Parent=TRINITY_DN12827_c0_g1_i1.mrna1;Target=TRINITY_DN12827_c0_g1_i1 291 1 .
scaffold_10	Conpu1	gene	1308586	1308876	.	-	.	ID=TRINITY_DN12827_c0_g1_i1.path1;Name=TRINITY_DN12827_c0_g1_i1
scaffold_10	Conpu1	mRNA	1308586	1308876	.	-	.	ID=TRINITY_DN12827_c0_g1_i1.mrna1;Name=TRINITY_DN12827_c0_g1_i1;Parent=TRINITY_DN12827_c0_g1_i1.path1;coverage=100.0;identity=100.0;matches=291;mismatches=0;indels=0;unknowns=0
scaffold_10	Conpu1	CDS	1308587	1308682	100	-	0	ID=TRINITY_DN12827_c0_g1_i1.mrna1.cds1;Name=TRINITY_DN12827_c0_g1_i1;Parent=TRINITY_DN12827_c0_g1_i1.mrna1;Target=TRINITY_DN12827_c0_g1_i1 290 195 .
scaffold_10	Conpu1	exon	1318594	1318617	100	-	.	ID=TRINITY_DN5825_c0_g1_i1.mrna1.exon2;Name=TRINITY_DN5825_c0_g1_i1;Parent=TRINITY_DN5825_c0_g1_i1.mrna1;Target=TRINITY_DN5825_c0_g1_i1 1 24 -
scaffold_10	Conpu1	gene	1318594	1318866	.	-	.	ID=TRINITY_DN5825_c0_g1_i1.path1;Name=TRINITY_DN5825_c0_g1_i1
scaffold_10	Conpu1	mRNA	1318594	1318866	.	-	.	ID=TRINITY_DN5825_c0_g1_i1.mrna1;Name=TRINITY_DN5825_c0_g1_i1;Parent=TRINITY_DN5825_c0_g1_i1.path1;coverage=100.0;identity=100.0;matches=216;mismatches=0;indels=0;unknowns=0
scaffold_10	Conpu1	exon	1318675	1318866	100	-	.	ID=TRINITY_DN5825_c0_g1_i1.mrna1.exon1;Name=TRINITY_DN5825_c0_g1_i1;Parent=TRINITY_DN5825_c0_g1_i1.mrna1;Target=TRINITY_DN5825_c0_g1_i1 25 216 -
scaffold_10	Conpu1	CDS	1318725	1318865	100	-	0	ID=TRINITY_DN5825_c0_g1_i1.mrna1.cds1;Name=TRINITY_DN5825_c0_g1_i1;Parent=TRINITY_DN5825_c0_g1_i1.mrna1;Target=TRINITY_DN5825_c0_g1_i1 75 215 .
scaffold_10	Conpu1	exon	1329649	1329868	100	+	.	ID=TRINITY_DN6266_c0_g1_i1.mrna1.exon1;Name=TRINITY_DN6266_c0_g1_i1;Parent=TRINITY_DN6266_c0_g1_i1.mrna1;Target=TRINITY_DN6266_c0_g1_i1 220 1 .
scaffold_10	Conpu1	gene	1329649	1329868	.	+	.	ID=TRINITY_DN6266_c0_g1_i1.path1;Name=TRINITY_DN6266_c0_g1_i1
scaffold_10	Conpu1	mRNA	1329649	1329868	.	+	.	ID=TRINITY_DN6266_c0_g1_i1.mrna1;Name=TRINITY_DN6266_c0_g1_i1;Parent=TRINITY_DN6266_c0_g1_i1.path1;coverage=100.0;identity=100.0;matches=220;mismatches=0;indels=0;unknowns=0
scaffold_10	Conpu1	CDS	1329650	1329868	100	+	0	ID=TRINITY_DN6266_c0_g1_i1.mrna1.cds1;Name=TRINITY_DN6266_c0_g1_i1;Parent=TRINITY_DN6266_c0_g1_i1.mrna1;Target=TRINITY_DN6266_c0_g1_i1 220 2 .
scaffold_10	Conpu1	exon	1345401	1345620	100	-	.	ID=TRINITY_DN12753_c0_g1_i1.mrna1.exon1;Name=TRINITY_DN12753_c0_g1_i1;Parent=TRINITY_DN12753_c0_g1_i1.mrna1;Target=TRINITY_DN12753_c0_g1_i1 220 1 .
scaffold_10	Conpu1	gene	1345401	1345620	.	-	.	ID=TRINITY_DN12753_c0_g1_i1.path1;Name=TRINITY_DN12753_c0_g1_i1
scaffold_10	Conpu1	mRNA	1345401	1345620	.	-	.	ID=TRINITY_DN12753_c0_g1_i1.mrna1;Name=TRINITY_DN12753_c0_g1_i1;Parent=TRINITY_DN12753_c0_g1_i1.path1;coverage=100.0;identity=100.0;matches=220;mismatches=0;indels=0;unknowns=0
scaffold_10	Conpu1	CDS	1345403	1345618	100	-	0	ID=TRINITY_DN12753_c0_g1_i1.mrna1.cds1;Name=TRINITY_DN12753_c0_g1_i1;Parent=TRINITY_DN12753_c0_g1_i1.mrna1;Target=TRINITY_DN12753_c0_g1_i1 218 3 .
scaffold_10	Conpu1	exon	1378873	1379319	100	+	.	ID=TRINITY_DN16528_c0_g1_i1.mrna1.exon1;Name=TRINITY_DN16528_c0_g1_i1;Parent=TRINITY_DN16528_c0_g1_i1.mrna1;Target=TRINITY_DN16528_c0_g1_i1 447 1 .
scaffold_10	Conpu1	gene	1378873	1379319	.	+	.	ID=TRINITY_DN16528_c0_g1_i1.path1;Name=TRINITY_DN16528_c0_g1_i1
scaffold_10	Conpu1	mRNA	1378873	1379319	.	+	.	ID=TRINITY_DN16528_c0_g1_i1.mrna1;Name=TRINITY_DN16528_c0_g1_i1;Parent=TRINITY_DN16528_c0_g1_i1.path1;coverage=96.5;identity=100.0;matches=447;mismatches=0;indels=0;unknowns=0
scaffold_10	Conpu1	CDS	1378874	1379308	100	+	0	ID=TRINITY_DN16528_c0_g1_i1.mrna1.cds1;Name=TRINITY_DN16528_c0_g1_i1;Parent=TRINITY_DN16528_c0_g1_i1.mrna1;Target=TRINITY_DN16528_c0_g1_i1 436 2 .
scaffold_10	Conpu1	CDS	1381135	1381254	100	+	0	ID=TRINITY_DN6075_c0_g1_i1.mrna1.cds1;Name=TRINITY_DN6075_c0_g1_i1;Parent=TRINITY_DN6075_c0_g1_i1.mrna1;Target=TRINITY_DN6075_c0_g1_i1 120 1 .
scaffold_10	Conpu1	exon	1381135	1381365	99	+	.	ID=TRINITY_DN6075_c0_g1_i1.mrna1.exon1;Name=TRINITY_DN6075_c0_g1_i1;Parent=TRINITY_DN6075_c0_g1_i1.mrna1;Target=TRINITY_DN6075_c0_g1_i1 229 1 .
scaffold_10	Conpu1	gene	1381135	1381365	.	+	.	ID=TRINITY_DN6075_c0_g1_i1.path1;Name=TRINITY_DN6075_c0_g1_i1
scaffold_10	Conpu1	mRNA	1381135	1381365	.	+	.	ID=TRINITY_DN6075_c0_g1_i1.mrna1;Name=TRINITY_DN6075_c0_g1_i1;Parent=TRINITY_DN6075_c0_g1_i1.path1;coverage=100.0;identity=99.1;matches=229;mismatches=0;indels=2;unknowns=0
scaffold_10	Conpu1	exon	1381320	1381533	100	-	.	ID=TRINITY_DN6075_c1_g1_i1.mrna1.exon1;Name=TRINITY_DN6075_c1_g1_i1;Parent=TRINITY_DN6075_c1_g1_i1.mrna1;Target=TRINITY_DN6075_c1_g1_i1 228 15 .
scaffold_10	Conpu1	gene	1381320	1381533	.	-	.	ID=TRINITY_DN6075_c1_g1_i1.path1;Name=TRINITY_DN6075_c1_g1_i1
scaffold_10	Conpu1	mRNA	1381320	1381533	.	-	.	ID=TRINITY_DN6075_c1_g1_i1.mrna1;Name=TRINITY_DN6075_c1_g1_i1;Parent=TRINITY_DN6075_c1_g1_i1.path1;coverage=93.9;identity=100.0;matches=214;mismatches=0;indels=0;unknowns=0
scaffold_10	Conpu1	CDS	1381380	1381532	100	-	0	ID=TRINITY_DN6075_c1_g1_i1.mrna1.cds1;Name=TRINITY_DN6075_c1_g1_i1;Parent=TRINITY_DN6075_c1_g1_i1.mrna1;Target=TRINITY_DN6075_c1_g1_i1 168 16 .
scaffold_10	Conpu1	exon	1383505	1383534	100	-	.	ID=TRINITY_DN11519_c0_g1_i1.mrna1.exon2;Name=TRINITY_DN11519_c0_g1_i1;Parent=TRINITY_DN11519_c0_g1_i1.mrna1;Target=TRINITY_DN11519_c0_g1_i1 1 30 -
scaffold_10	Conpu1	gene	1383505	1383951	.	-	.	ID=TRINITY_DN11519_c0_g1_i1.path1;Name=TRINITY_DN11519_c0_g1_i1
scaffold_10	Conpu1	mRNA	1383505	1383951	.	-	.	ID=TRINITY_DN11519_c0_g1_i1.mrna1;Name=TRINITY_DN11519_c0_g1_i1;Parent=TRINITY_DN11519_c0_g1_i1.path1;coverage=100.0;identity=100.0;matches=389;mismatches=0;indels=0;unknowns=0
scaffold_10	Conpu1	CDS	1383506	1383534	100	-	1	ID=TRINITY_DN11519_c0_g1_i1.mrna1.cds2;Name=TRINITY_DN11519_c0_g1_i1;Parent=TRINITY_DN11519_c0_g1_i1.mrna1;Target=TRINITY_DN11519_c0_g1_i1 2 30 .
scaffold_10	Conpu1	CDS	1383593	1383758	100	-	0	ID=TRINITY_DN11519_c0_g1_i1.mrna1.cds1;Name=TRINITY_DN11519_c0_g1_i1;Parent=TRINITY_DN11519_c0_g1_i1.mrna1;Target=TRINITY_DN11519_c0_g1_i1 31 196 .
scaffold_10	Conpu1	exon	1383593	1383951	100	-	.	ID=TRINITY_DN11519_c0_g1_i1.mrna1.exon1;Name=TRINITY_DN11519_c0_g1_i1;Parent=TRINITY_DN11519_c0_g1_i1.mrna1;Target=TRINITY_DN11519_c0_g1_i1 31 389 -
scaffold_10	Conpu1	CDS	1385226	1385441	100	-	0	ID=TRINITY_DN9695_c0_g1_i1.mrna1.cds1;Name=TRINITY_DN9695_c0_g1_i1;Parent=TRINITY_DN9695_c0_g1_i1.mrna1;Target=TRINITY_DN9695_c0_g1_i1 218 3 .
scaffold_10	Conpu1	exon	1385226	1385443	100	-	.	ID=TRINITY_DN9695_c0_g1_i1.mrna1.exon1;Name=TRINITY_DN9695_c0_g1_i1;Parent=TRINITY_DN9695_c0_g1_i1.mrna1;Target=TRINITY_DN9695_c0_g1_i1 218 1 .
scaffold_10	Conpu1	gene	1385226	1385443	.	-	.	ID=TRINITY_DN9695_c0_g1_i1.path1;Name=TRINITY_DN9695_c0_g1_i1
scaffold_10	Conpu1	mRNA	1385226	1385443	.	-	.	ID=TRINITY_DN9695_c0_g1_i1.mrna1;Name=TRINITY_DN9695_c0_g1_i1;Parent=TRINITY_DN9695_c0_g1_i1.path1;coverage=100.0;identity=100.0;matches=218;mismatches=0;indels=0;unknowns=0
scaffold_10	Conpu1	exon	1413194	1413340	100	+	.	ID=TRINITY_DN12371_c0_g1_i1.mrna1.exon1;Name=TRINITY_DN12371_c0_g1_i1;Parent=TRINITY_DN12371_c0_g1_i1.mrna1;Target=TRINITY_DN12371_c0_g1_i1 1 147 +
scaffold_10	Conpu1	gene	1413194	1413449	.	+	.	ID=TRINITY_DN12371_c0_g1_i1.path1;Name=TRINITY_DN12371_c0_g1_i1
scaffold_10	Conpu1	mRNA	1413194	1413449	.	+	.	ID=TRINITY_DN12371_c0_g1_i1.mrna1;Name=TRINITY_DN12371_c0_g1_i1;Parent=TRINITY_DN12371_c0_g1_i1.path1;coverage=100.0;identity=100.0;matches=204;mismatches=0;indels=0;unknowns=0
scaffold_10	Conpu1	CDS	1413196	1413324	100	+	0	ID=TRINITY_DN12371_c0_g1_i1.mrna1.cds1;Name=TRINITY_DN12371_c0_g1_i1;Parent=TRINITY_DN12371_c0_g1_i1.mrna1;Target=TRINITY_DN12371_c0_g1_i1 3 131 +
scaffold_10	Conpu1	exon	1413393	1413449	100	+	.	ID=TRINITY_DN12371_c0_g1_i1.mrna1.exon2;Name=TRINITY_DN12371_c0_g1_i1;Parent=TRINITY_DN12371_c0_g1_i1.mrna1;Target=TRINITY_DN12371_c0_g1_i1 148 204 +
scaffold_10	Conpu1	exon	1432500	1432734	100	-	.	ID=TRINITY_DN13331_c0_g1_i1.mrna1.exon1;Name=TRINITY_DN13331_c0_g1_i1;Parent=TRINITY_DN13331_c0_g1_i1.mrna1;Target=TRINITY_DN13331_c0_g1_i1 235 1 .
scaffold_10	Conpu1	gene	1432500	1432734	.	-	.	ID=TRINITY_DN13331_c0_g1_i1.path1;Name=TRINITY_DN13331_c0_g1_i1
scaffold_10	Conpu1	mRNA	1432500	1432734	.	-	.	ID=TRINITY_DN13331_c0_g1_i1.mrna1;Name=TRINITY_DN13331_c0_g1_i1;Parent=TRINITY_DN13331_c0_g1_i1.path1;coverage=100.0;identity=100.0;matches=235;mismatches=0;indels=0;unknowns=0
scaffold_10	Conpu1	CDS	1432514	1432732	100	-	0	ID=TRINITY_DN13331_c0_g1_i1.mrna1.cds1;Name=TRINITY_DN13331_c0_g1_i1;Parent=TRINITY_DN13331_c0_g1_i1.mrna1;Target=TRINITY_DN13331_c0_g1_i1 221 3 .
scaffold_10	Conpu1	exon	1432818	1433096	100	-	.	ID=TRINITY_DN15961_c0_g1_i1.mrna1.exon1;Name=TRINITY_DN15961_c0_g1_i1;Parent=TRINITY_DN15961_c0_g1_i1.mrna1;Target=TRINITY_DN15961_c0_g1_i1 279 1 .
scaffold_10	Conpu1	gene	1432818	1433096	.	-	.	ID=TRINITY_DN15961_c0_g1_i1.path1;Name=TRINITY_DN15961_c0_g1_i1
scaffold_10	Conpu1	mRNA	1432818	1433096	.	-	.	ID=TRINITY_DN15961_c0_g1_i1.mrna1;Name=TRINITY_DN15961_c0_g1_i1;Parent=TRINITY_DN15961_c0_g1_i1.path1;coverage=100.0;identity=100.0;matches=279;mismatches=0;indels=0;unknowns=0
scaffold_10	Conpu1	CDS	1432882	1433094	100	-	0	ID=TRINITY_DN15961_c0_g1_i1.mrna1.cds1;Name=TRINITY_DN15961_c0_g1_i1;Parent=TRINITY_DN15961_c0_g1_i1.mrna1;Target=TRINITY_DN15961_c0_g1_i1 215 3 .
scaffold_10	Conpu1	exon	1435765	1435990	100	-	.	ID=TRINITY_DN7324_c0_g1_i1.mrna1.exon1;Name=TRINITY_DN7324_c0_g1_i1;Parent=TRINITY_DN7324_c0_g1_i1.mrna1;Target=TRINITY_DN7324_c0_g1_i1 226 1 .
scaffold_10	Conpu1	gene	1435765	1435990	.	-	.	ID=TRINITY_DN7324_c0_g1_i1.path1;Name=TRINITY_DN7324_c0_g1_i1
scaffold_10	Conpu1	mRNA	1435765	1435990	.	-	.	ID=TRINITY_DN7324_c0_g1_i1.mrna1;Name=TRINITY_DN7324_c0_g1_i1;Parent=TRINITY_DN7324_c0_g1_i1.path1;coverage=100.0;identity=100.0;matches=226;mismatches=0;indels=0;unknowns=0
scaffold_10	Conpu1	CDS	1435848	1435988	100	-	0	ID=TRINITY_DN7324_c0_g1_i1.mrna1.cds1;Name=TRINITY_DN7324_c0_g1_i1;Parent=TRINITY_DN7324_c0_g1_i1.mrna1;Target=TRINITY_DN7324_c0_g1_i1 143 3 .
scaffold_10	Conpu1	exon	1435971	1436210	100	-	.	ID=TRINITY_DN6811_c0_g1_i1.mrna1.exon1;Name=TRINITY_DN6811_c0_g1_i1;Parent=TRINITY_DN6811_c0_g1_i1.mrna1;Target=TRINITY_DN6811_c0_g1_i1 240 1 .
scaffold_10	Conpu1	gene	1435971	1436210	.	-	.	ID=TRINITY_DN6811_c0_g1_i1.path1;Name=TRINITY_DN6811_c0_g1_i1
scaffold_10	Conpu1	mRNA	1435971	1436210	.	-	.	ID=TRINITY_DN6811_c0_g1_i1.mrna1;Name=TRINITY_DN6811_c0_g1_i1;Parent=TRINITY_DN6811_c0_g1_i1.path1;coverage=100.0;identity=100.0;matches=240;mismatches=0;indels=0;unknowns=0
scaffold_10	Conpu1	CDS	1436131	1436208	100	-	0	ID=TRINITY_DN6811_c0_g1_i1.mrna1.cds1;Name=TRINITY_DN6811_c0_g1_i1;Parent=TRINITY_DN6811_c0_g1_i1.mrna1;Target=TRINITY_DN6811_c0_g1_i1 80 3 .
scaffold_10	Conpu1	exon	1446370	1446636	100	-	.	ID=TRINITY_DN15865_c0_g1_i1.mrna1.exon1;Name=TRINITY_DN15865_c0_g1_i1;Parent=TRINITY_DN15865_c0_g1_i1.mrna1;Target=TRINITY_DN15865_c0_g1_i1 267 1 .
scaffold_10	Conpu1	gene	1446370	1446636	.	-	.	ID=TRINITY_DN15865_c0_g1_i1.path1;Name=TRINITY_DN15865_c0_g1_i1
scaffold_10	Conpu1	mRNA	1446370	1446636	.	-	.	ID=TRINITY_DN15865_c0_g1_i1.mrna1;Name=TRINITY_DN15865_c0_g1_i1;Parent=TRINITY_DN15865_c0_g1_i1.path1;coverage=100.0;identity=100.0;matches=267;mismatches=0;indels=0;unknowns=0
scaffold_10	Conpu1	CDS	1446494	1446634	100	-	0	ID=TRINITY_DN15865_c0_g1_i1.mrna1.cds1;Name=TRINITY_DN15865_c0_g1_i1;Parent=TRINITY_DN15865_c0_g1_i1.mrna1;Target=TRINITY_DN15865_c0_g1_i1 143 3 .
scaffold_10	Conpu1	exon	1450547	1450680	100	+	.	ID=TRINITY_DN1669_c0_g1_i2.mrna1.exon1;Name=TRINITY_DN1669_c0_g1_i2;Parent=TRINITY_DN1669_c0_g1_i2.mrna1;Target=TRINITY_DN1669_c0_g1_i2 401 534 -
scaffold_10	Conpu1	exon	1450547	1451136	100	-	.	ID=TRINITY_DN1669_c0_g1_i1.mrna1.exon1;Name=TRINITY_DN1669_c0_g1_i1;Parent=TRINITY_DN1669_c0_g1_i1.mrna1;Target=TRINITY_DN1669_c0_g1_i1 590 1 .
scaffold_10	Conpu1	gene	1450547	1451136	.	-	.	ID=TRINITY_DN1669_c0_g1_i1.path1;Name=TRINITY_DN1669_c0_g1_i1
scaffold_10	Conpu1	gene	1450547	1451136	.	+	.	ID=TRINITY_DN1669_c0_g1_i2.path1;Name=TRINITY_DN1669_c0_g1_i2
scaffold_10	Conpu1	mRNA	1450547	1451136	.	-	.	ID=TRINITY_DN1669_c0_g1_i1.mrna1;Name=TRINITY_DN1669_c0_g1_i1;Parent=TRINITY_DN1669_c0_g1_i1.path1;coverage=100.0;identity=100.0;matches=590;mismatches=0;indels=0;unknowns=0
scaffold_10	Conpu1	mRNA	1450547	1451136	.	+	.	ID=TRINITY_DN1669_c0_g1_i2.mrna1;Name=TRINITY_DN1669_c0_g1_i2;Parent=TRINITY_DN1669_c0_g1_i2.path1;coverage=100.0;identity=100.0;matches=534;mismatches=0;indels=0;unknowns=0
scaffold_10	Conpu1	exon	1450737	1451136	100	+	.	ID=TRINITY_DN1669_c0_g1_i2.mrna1.exon2;Name=TRINITY_DN1669_c0_g1_i2;Parent=TRINITY_DN1669_c0_g1_i2.mrna1;Target=TRINITY_DN1669_c0_g1_i2 1 400 -
scaffold_10	Conpu1	CDS	1450739	1450933	100	-	0	ID=TRINITY_DN1669_c0_g1_i1.mrna1.cds1;Name=TRINITY_DN1669_c0_g1_i1;Parent=TRINITY_DN1669_c0_g1_i1.mrna1;Target=TRINITY_DN1669_c0_g1_i1 398 204 .
scaffold_10	Conpu1	CDS	1450917	1451018	100	+	0	ID=TRINITY_DN1669_c0_g1_i2.mrna1.cds1;Name=TRINITY_DN1669_c0_g1_i2;Parent=TRINITY_DN1669_c0_g1_i2.mrna1;Target=TRINITY_DN1669_c0_g1_i2 119 220 .
scaffold_10	Conpu1	CDS	1452664	1452848	100	+	0	ID=TRINITY_DN15934_c0_g1_i1.mrna1.cds1;Name=TRINITY_DN15934_c0_g1_i1;Parent=TRINITY_DN15934_c0_g1_i1.mrna1;Target=TRINITY_DN15934_c0_g1_i1 1 185 +
scaffold_10	Conpu1	exon	1452664	1452848	100	+	.	ID=TRINITY_DN15934_c0_g1_i1.mrna1.exon1;Name=TRINITY_DN15934_c0_g1_i1;Parent=TRINITY_DN15934_c0_g1_i1.mrna1;Target=TRINITY_DN15934_c0_g1_i1 1 185 +
scaffold_10	Conpu1	gene	1452664	1452966	.	+	.	ID=TRINITY_DN15934_c0_g1_i1.path1;Name=TRINITY_DN15934_c0_g1_i1
scaffold_10	Conpu1	mRNA	1452664	1452966	.	+	.	ID=TRINITY_DN15934_c0_g1_i1.mrna1;Name=TRINITY_DN15934_c0_g1_i1;Parent=TRINITY_DN15934_c0_g1_i1.path1;coverage=99.6;identity=100.0;matches=248;mismatches=0;indels=0;unknowns=0
scaffold_10	Conpu1	CDS	1452904	1452964	100	+	2	ID=TRINITY_DN15934_c0_g1_i1.mrna1.cds2;Name=TRINITY_DN15934_c0_g1_i1;Parent=TRINITY_DN15934_c0_g1_i1.mrna1;Target=TRINITY_DN15934_c0_g1_i1 186 246 +
scaffold_10	Conpu1	exon	1452904	1452966	100	+	.	ID=TRINITY_DN15934_c0_g1_i1.mrna1.exon2;Name=TRINITY_DN15934_c0_g1_i1;Parent=TRINITY_DN15934_c0_g1_i1.mrna1;Target=TRINITY_DN15934_c0_g1_i1 186 248 +
scaffold_10	Conpu1	exon	1515878	1516218	99	-	.	ID=TRINITY_DN9583_c0_g1_i1.mrna1.exon2;Name=TRINITY_DN9583_c0_g1_i1;Parent=TRINITY_DN9583_c0_g1_i1.mrna1;Target=TRINITY_DN9583_c0_g1_i1 1 341 -
scaffold_10	Conpu1	gene	1515878	1516332	.	-	.	ID=TRINITY_DN9583_c0_g1_i1.path1;Name=TRINITY_DN9583_c0_g1_i1
scaffold_10	Conpu1	mRNA	1515878	1516332	.	-	.	ID=TRINITY_DN9583_c0_g1_i1.mrna1;Name=TRINITY_DN9583_c0_g1_i1;Parent=TRINITY_DN9583_c0_g1_i1.path1;coverage=100.0;identity=99.7;matches=384;mismatches=1;indels=0;unknowns=0
scaffold_10	Conpu1	CDS	1515956	1516180	100	-	0	ID=TRINITY_DN9583_c0_g1_i1.mrna1.cds1;Name=TRINITY_DN9583_c0_g1_i1;Parent=TRINITY_DN9583_c0_g1_i1.mrna1;Target=TRINITY_DN9583_c0_g1_i1 79 303 .
scaffold_10	Conpu1	exon	1516289	1516332	100	-	.	ID=TRINITY_DN9583_c0_g1_i1.mrna1.exon1;Name=TRINITY_DN9583_c0_g1_i1;Parent=TRINITY_DN9583_c0_g1_i1.mrna1;Target=TRINITY_DN9583_c0_g1_i1 342 385 -
scaffold_10	Conpu1	CDS	1516628	1516744	100	+	0	ID=TRINITY_DN11595_c0_g1_i1.mrna1.cds1;Name=TRINITY_DN11595_c0_g1_i1;Parent=TRINITY_DN11595_c0_g1_i1.mrna1;Target=TRINITY_DN11595_c0_g1_i1 1 117 +
scaffold_10	Conpu1	exon	1516628	1516744	100	+	.	ID=TRINITY_DN11595_c0_g1_i1.mrna1.exon1;Name=TRINITY_DN11595_c0_g1_i1;Parent=TRINITY_DN11595_c0_g1_i1.mrna1;Target=TRINITY_DN11595_c0_g1_i1 1 117 +
scaffold_10	Conpu1	gene	1516628	1517245	.	+	.	ID=TRINITY_DN11595_c0_g1_i1.path1;Name=TRINITY_DN11595_c0_g1_i1
scaffold_10	Conpu1	mRNA	1516628	1517245	.	+	.	ID=TRINITY_DN11595_c0_g1_i1.mrna1;Name=TRINITY_DN11595_c0_g1_i1;Parent=TRINITY_DN11595_c0_g1_i1.path1;coverage=100.0;identity=99.8;matches=444;mismatches=1;indels=0;unknowns=0
scaffold_10	Conpu1	CDS	1516809	1516901	100	+	0	ID=TRINITY_DN11595_c0_g1_i1.mrna1.cds2;Name=TRINITY_DN11595_c0_g1_i1;Parent=TRINITY_DN11595_c0_g1_i1.mrna1;Target=TRINITY_DN11595_c0_g1_i1 118 210 +
scaffold_10	Conpu1	exon	1516809	1516993	100	+	.	ID=TRINITY_DN11595_c0_g1_i1.mrna1.exon2;Name=TRINITY_DN11595_c0_g1_i1;Parent=TRINITY_DN11595_c0_g1_i1.mrna1;Target=TRINITY_DN11595_c0_g1_i1 118 302 +
scaffold_10	Conpu1	exon	1517047	1517122	100	+	.	ID=TRINITY_DN11595_c0_g1_i1.mrna1.exon3;Name=TRINITY_DN11595_c0_g1_i1;Parent=TRINITY_DN11595_c0_g1_i1.mrna1;Target=TRINITY_DN11595_c0_g1_i1 303 378 +
scaffold_10	Conpu1	exon	1517179	1517245	98	+	.	ID=TRINITY_DN11595_c0_g1_i1.mrna1.exon4;Name=TRINITY_DN11595_c0_g1_i1;Parent=TRINITY_DN11595_c0_g1_i1.mrna1;Target=TRINITY_DN11595_c0_g1_i1 379 445 +
scaffold_10	Conpu1	CDS	1576069	1576299	100	-	0	ID=TRINITY_DN8698_c0_g1_i1.mrna1.cds1;Name=TRINITY_DN8698_c0_g1_i1;Parent=TRINITY_DN8698_c0_g1_i1.mrna1;Target=TRINITY_DN8698_c0_g1_i1 231 1 .
scaffold_10	Conpu1	exon	1576069	1576299	100	-	.	ID=TRINITY_DN8698_c0_g1_i1.mrna1.exon1;Name=TRINITY_DN8698_c0_g1_i1;Parent=TRINITY_DN8698_c0_g1_i1.mrna1;Target=TRINITY_DN8698_c0_g1_i1 231 1 .
scaffold_10	Conpu1	gene	1576069	1576299	.	-	.	ID=TRINITY_DN8698_c0_g1_i1.path1;Name=TRINITY_DN8698_c0_g1_i1
scaffold_10	Conpu1	mRNA	1576069	1576299	.	-	.	ID=TRINITY_DN8698_c0_g1_i1.mrna1;Name=TRINITY_DN8698_c0_g1_i1;Parent=TRINITY_DN8698_c0_g1_i1.path1;coverage=100.0;identity=100.0;matches=231;mismatches=0;indels=0;unknowns=0
scaffold_10	Conpu1	exon	1582884	1583146	100	-	.	ID=TRINITY_DN8819_c0_g1_i1.mrna1.exon1;Name=TRINITY_DN8819_c0_g1_i1;Parent=TRINITY_DN8819_c0_g1_i1.mrna1;Target=TRINITY_DN8819_c0_g1_i1 263 1 .
scaffold_10	Conpu1	gene	1582884	1583146	.	-	.	ID=TRINITY_DN8819_c0_g1_i1.path1;Name=TRINITY_DN8819_c0_g1_i1
scaffold_10	Conpu1	mRNA	1582884	1583146	.	-	.	ID=TRINITY_DN8819_c0_g1_i1.mrna1;Name=TRINITY_DN8819_c0_g1_i1;Parent=TRINITY_DN8819_c0_g1_i1.path1;coverage=100.0;identity=100.0;matches=263;mismatches=0;indels=0;unknowns=0
scaffold_10	Conpu1	CDS	1582885	1583145	100	-	0	ID=TRINITY_DN8819_c0_g1_i1.mrna1.cds1;Name=TRINITY_DN8819_c0_g1_i1;Parent=TRINITY_DN8819_c0_g1_i1.mrna1;Target=TRINITY_DN8819_c0_g1_i1 262 2 .
scaffold_10	Conpu1	exon	1614814	1615246	100	-	.	ID=TRINITY_DN5945_c0_g1_i1.mrna1.exon1;Name=TRINITY_DN5945_c0_g1_i1;Parent=TRINITY_DN5945_c0_g1_i1.mrna1;Target=TRINITY_DN5945_c0_g1_i1 434 2 .
scaffold_10	Conpu1	gene	1614814	1615246	.	-	.	ID=TRINITY_DN5945_c0_g1_i1.path1;Name=TRINITY_DN5945_c0_g1_i1
scaffold_10	Conpu1	mRNA	1614814	1615246	.	-	.	ID=TRINITY_DN5945_c0_g1_i1.mrna1;Name=TRINITY_DN5945_c0_g1_i1;Parent=TRINITY_DN5945_c0_g1_i1.path1;coverage=99.8;identity=100.0;matches=433;mismatches=0;indels=0;unknowns=0
scaffold_10	Conpu1	CDS	1615132	1615245	100	-	0	ID=TRINITY_DN5945_c0_g1_i1.mrna1.cds1;Name=TRINITY_DN5945_c0_g1_i1;Parent=TRINITY_DN5945_c0_g1_i1.mrna1;Target=TRINITY_DN5945_c0_g1_i1 116 3 .
scaffold_10	Conpu1	CDS	1619700	1619852	100	+	0	ID=TRINITY_DN15958_c0_g1_i1.mrna1.cds1;Name=TRINITY_DN15958_c0_g1_i1;Parent=TRINITY_DN15958_c0_g1_i1.mrna1;Target=TRINITY_DN15958_c0_g1_i1 153 1 .
scaffold_10	Conpu1	exon	1619700	1620066	100	+	.	ID=TRINITY_DN15958_c0_g1_i1.mrna1.exon1;Name=TRINITY_DN15958_c0_g1_i1;Parent=TRINITY_DN15958_c0_g1_i1.mrna1;Target=TRINITY_DN15958_c0_g1_i1 367 1 .
scaffold_10	Conpu1	gene	1619700	1620066	.	+	.	ID=TRINITY_DN15958_c0_g1_i1.path1;Name=TRINITY_DN15958_c0_g1_i1
scaffold_10	Conpu1	mRNA	1619700	1620066	.	+	.	ID=TRINITY_DN15958_c0_g1_i1.mrna1;Name=TRINITY_DN15958_c0_g1_i1;Parent=TRINITY_DN15958_c0_g1_i1.path1;coverage=100.0;identity=100.0;matches=367;mismatches=0;indels=0;unknowns=0
scaffold_10	Conpu1	exon	1625333	1626357	100	-	.	ID=TRINITY_DN4811_c0_g1_i1.mrna1.exon1;Name=TRINITY_DN4811_c0_g1_i1;Parent=TRINITY_DN4811_c0_g1_i1.mrna1;Target=TRINITY_DN4811_c0_g1_i1 1025 1 .
scaffold_10	Conpu1	gene	1625333	1626357	.	-	.	ID=TRINITY_DN4811_c0_g1_i1.path1;Name=TRINITY_DN4811_c0_g1_i1
scaffold_10	Conpu1	mRNA	1625333	1626357	.	-	.	ID=TRINITY_DN4811_c0_g1_i1.mrna1;Name=TRINITY_DN4811_c0_g1_i1;Parent=TRINITY_DN4811_c0_g1_i1.path1;coverage=100.0;identity=100.0;matches=1025;mismatches=0;indels=0;unknowns=0
scaffold_10	Conpu1	CDS	1625778	1625987	100	-	0	ID=TRINITY_DN4811_c0_g1_i1.mrna1.cds1;Name=TRINITY_DN4811_c0_g1_i1;Parent=TRINITY_DN4811_c0_g1_i1.mrna1;Target=TRINITY_DN4811_c0_g1_i1 580 371 .
scaffold_10	Conpu1	exon	1626337	1626572	100	+	.	ID=TRINITY_DN14697_c0_g1_i1.mrna1.exon1;Name=TRINITY_DN14697_c0_g1_i1;Parent=TRINITY_DN14697_c0_g1_i1.mrna1;Target=TRINITY_DN14697_c0_g1_i1 236 1 .
scaffold_10	Conpu1	gene	1626337	1626572	.	+	.	ID=TRINITY_DN14697_c0_g1_i1.path1;Name=TRINITY_DN14697_c0_g1_i1
scaffold_10	Conpu1	mRNA	1626337	1626572	.	+	.	ID=TRINITY_DN14697_c0_g1_i1.mrna1;Name=TRINITY_DN14697_c0_g1_i1;Parent=TRINITY_DN14697_c0_g1_i1.path1;coverage=100.0;identity=100.0;matches=236;mismatches=0;indels=0;unknowns=0
scaffold_10	Conpu1	CDS	1626338	1626499	100	+	0	ID=TRINITY_DN14697_c0_g1_i1.mrna1.cds1;Name=TRINITY_DN14697_c0_g1_i1;Parent=TRINITY_DN14697_c0_g1_i1.mrna1;Target=TRINITY_DN14697_c0_g1_i1 163 2 .
scaffold_10	Conpu1	CDS	1690797	1691024	100	+	0	ID=TRINITY_DN6156_c0_g1_i1.mrna1.cds1;Name=TRINITY_DN6156_c0_g1_i1;Parent=TRINITY_DN6156_c0_g1_i1.mrna1;Target=TRINITY_DN6156_c0_g1_i1 228 1 .
scaffold_10	Conpu1	exon	1690797	1691026	100	+	.	ID=TRINITY_DN6156_c0_g1_i1.mrna1.exon1;Name=TRINITY_DN6156_c0_g1_i1;Parent=TRINITY_DN6156_c0_g1_i1.mrna1;Target=TRINITY_DN6156_c0_g1_i1 230 1 .
scaffold_10	Conpu1	gene	1690797	1691026	.	+	.	ID=TRINITY_DN6156_c0_g1_i1.path1;Name=TRINITY_DN6156_c0_g1_i1
scaffold_10	Conpu1	mRNA	1690797	1691026	.	+	.	ID=TRINITY_DN6156_c0_g1_i1.mrna1;Name=TRINITY_DN6156_c0_g1_i1;Parent=TRINITY_DN6156_c0_g1_i1.path1;coverage=100.0;identity=100.0;matches=230;mismatches=0;indels=0;unknowns=0
scaffold_10	Conpu1	CDS	1691017	1691130	100	+	0	ID=TRINITY_DN6506_c0_g1_i1.mrna1.cds1;Name=TRINITY_DN6506_c0_g1_i1;Parent=TRINITY_DN6506_c0_g1_i1.mrna1;Target=TRINITY_DN6506_c0_g1_i1 114 1 .
scaffold_10	Conpu1	exon	1691017	1691340	100	+	.	ID=TRINITY_DN6506_c0_g1_i1.mrna1.exon1;Name=TRINITY_DN6506_c0_g1_i1;Parent=TRINITY_DN6506_c0_g1_i1.mrna1;Target=TRINITY_DN6506_c0_g1_i1 324 1 .
scaffold_10	Conpu1	gene	1691017	1691340	.	+	.	ID=TRINITY_DN6506_c0_g1_i1.path1;Name=TRINITY_DN6506_c0_g1_i1
scaffold_10	Conpu1	mRNA	1691017	1691340	.	+	.	ID=TRINITY_DN6506_c0_g1_i1.mrna1;Name=TRINITY_DN6506_c0_g1_i1;Parent=TRINITY_DN6506_c0_g1_i1.path1;coverage=100.0;identity=100.0;matches=324;mismatches=0;indels=0;unknowns=0
scaffold_10	Conpu1	exon	1691341	1691658	100	+	.	ID=TRINITY_DN11116_c0_g1_i1.mrna1.exon1;Name=TRINITY_DN11116_c0_g1_i1;Parent=TRINITY_DN11116_c0_g1_i1.mrna1;Target=TRINITY_DN11116_c0_g1_i1 318 1 .
scaffold_10	Conpu1	gene	1691341	1691658	.	+	.	ID=TRINITY_DN11116_c0_g1_i1.path1;Name=TRINITY_DN11116_c0_g1_i1
scaffold_10	Conpu1	mRNA	1691341	1691658	.	+	.	ID=TRINITY_DN11116_c0_g1_i1.mrna1;Name=TRINITY_DN11116_c0_g1_i1;Parent=TRINITY_DN11116_c0_g1_i1.path1;coverage=100.0;identity=100.0;matches=318;mismatches=0;indels=0;unknowns=0
scaffold_10	Conpu1	CDS	1691342	1691656	100	+	0	ID=TRINITY_DN11116_c0_g1_i1.mrna1.cds1;Name=TRINITY_DN11116_c0_g1_i1;Parent=TRINITY_DN11116_c0_g1_i1.mrna1;Target=TRINITY_DN11116_c0_g1_i1 316 2 .
scaffold_10	Conpu1	exon	1703597	1704040	100	-	.	ID=TRINITY_DN9701_c0_g1_i1.mrna1.exon2;Name=TRINITY_DN9701_c0_g1_i1;Parent=TRINITY_DN9701_c0_g1_i1.mrna1;Target=TRINITY_DN9701_c0_g1_i1 1 444 -
scaffold_10	Conpu1	gene	1703597	1704214	.	-	.	ID=TRINITY_DN9701_c0_g1_i1.path1;Name=TRINITY_DN9701_c0_g1_i1
scaffold_10	Conpu1	mRNA	1703597	1704214	.	-	.	ID=TRINITY_DN9701_c0_g1_i1.mrna1;Name=TRINITY_DN9701_c0_g1_i1;Parent=TRINITY_DN9701_c0_g1_i1.path1;coverage=100.0;identity=100.0;matches=502;mismatches=0;indels=0;unknowns=0
scaffold_10	Conpu1	CDS	1703893	1704040	100	-	2	ID=TRINITY_DN9701_c0_g1_i1.mrna1.cds2;Name=TRINITY_DN9701_c0_g1_i1;Parent=TRINITY_DN9701_c0_g1_i1.mrna1;Target=TRINITY_DN9701_c0_g1_i1 297 444 .
scaffold_10	Conpu1	CDS	1704157	1704212	100	-	0	ID=TRINITY_DN9701_c0_g1_i1.mrna1.cds1;Name=TRINITY_DN9701_c0_g1_i1;Parent=TRINITY_DN9701_c0_g1_i1.mrna1;Target=TRINITY_DN9701_c0_g1_i1 445 500 .
scaffold_10	Conpu1	exon	1704157	1704214	100	-	.	ID=TRINITY_DN9701_c0_g1_i1.mrna1.exon1;Name=TRINITY_DN9701_c0_g1_i1;Parent=TRINITY_DN9701_c0_g1_i1.mrna1;Target=TRINITY_DN9701_c0_g1_i1 445 502 -
scaffold_10	Conpu1	exon	1751308	1751663	100	-	.	ID=TRINITY_DN16383_c0_g1_i1.mrna1.exon2;Name=TRINITY_DN16383_c0_g1_i1;Parent=TRINITY_DN16383_c0_g1_i1.mrna1;Target=TRINITY_DN16383_c0_g1_i1 139 494 +
scaffold_10	Conpu1	gene	1751308	1751853	.	-	.	ID=TRINITY_DN16383_c0_g1_i1.path1;Name=TRINITY_DN16383_c0_g1_i1
scaffold_10	Conpu1	mRNA	1751308	1751853	.	-	.	ID=TRINITY_DN16383_c0_g1_i1.mrna1;Name=TRINITY_DN16383_c0_g1_i1;Parent=TRINITY_DN16383_c0_g1_i1.path1;coverage=100.0;identity=100.0;matches=494;mismatches=0;indels=0;unknowns=0
scaffold_10	Conpu1	CDS	1751592	1751663	100	-	0	ID=TRINITY_DN16383_c0_g1_i1.mrna1.cds2;Name=TRINITY_DN16383_c0_g1_i1;Parent=TRINITY_DN16383_c0_g1_i1.mrna1;Target=TRINITY_DN16383_c0_g1_i1 139 210 +
scaffold_10	Conpu1	CDS	1751716	1751853	100	-	0	ID=TRINITY_DN16383_c0_g1_i1.mrna1.cds1;Name=TRINITY_DN16383_c0_g1_i1;Parent=TRINITY_DN16383_c0_g1_i1.mrna1;Target=TRINITY_DN16383_c0_g1_i1 1 138 +
scaffold_10	Conpu1	exon	1751716	1751853	100	-	.	ID=TRINITY_DN16383_c0_g1_i1.mrna1.exon1;Name=TRINITY_DN16383_c0_g1_i1;Parent=TRINITY_DN16383_c0_g1_i1.mrna1;Target=TRINITY_DN16383_c0_g1_i1 1 138 +
scaffold_10	Conpu1	exon	1766751	1767001	100	-	.	ID=TRINITY_DN15507_c0_g1_i1.mrna1.exon1;Name=TRINITY_DN15507_c0_g1_i1;Parent=TRINITY_DN15507_c0_g1_i1.mrna1;Target=TRINITY_DN15507_c0_g1_i1 256 6 .
scaffold_10	Conpu1	gene	1766751	1767001	.	-	.	ID=TRINITY_DN15507_c0_g1_i1.path1;Name=TRINITY_DN15507_c0_g1_i1
scaffold_10	Conpu1	mRNA	1766751	1767001	.	-	.	ID=TRINITY_DN15507_c0_g1_i1.mrna1;Name=TRINITY_DN15507_c0_g1_i1;Parent=TRINITY_DN15507_c0_g1_i1.path1;coverage=98.0;identity=100.0;matches=251;mismatches=0;indels=0;unknowns=0
scaffold_10	Conpu1	CDS	1766885	1767001	100	-	0	ID=TRINITY_DN15507_c0_g1_i1.mrna1.cds1;Name=TRINITY_DN15507_c0_g1_i1;Parent=TRINITY_DN15507_c0_g1_i1.mrna1;Target=TRINITY_DN15507_c0_g1_i1 122 6 .
scaffold_10	Conpu1	exon	1772046	1772250	100	+	.	ID=TRINITY_DN6462_c0_g1_i1.mrna1.exon1;Name=TRINITY_DN6462_c0_g1_i1;Parent=TRINITY_DN6462_c0_g1_i1.mrna1;Target=TRINITY_DN6462_c0_g1_i1 219 15 .
scaffold_10	Conpu1	gene	1772046	1772250	.	+	.	ID=TRINITY_DN6462_c0_g1_i1.path1;Name=TRINITY_DN6462_c0_g1_i1
scaffold_10	Conpu1	mRNA	1772046	1772250	.	+	.	ID=TRINITY_DN6462_c0_g1_i1.mrna1;Name=TRINITY_DN6462_c0_g1_i1;Parent=TRINITY_DN6462_c0_g1_i1.path1;coverage=93.6;identity=100.0;matches=205;mismatches=0;indels=0;unknowns=0
scaffold_10	Conpu1	CDS	1772048	1772248	100	+	0	ID=TRINITY_DN6462_c0_g1_i1.mrna1.cds1;Name=TRINITY_DN6462_c0_g1_i1;Parent=TRINITY_DN6462_c0_g1_i1.mrna1;Target=TRINITY_DN6462_c0_g1_i1 217 17 .
scaffold_10	Conpu1	exon	1833217	1833239	100	+	.	ID=TRINITY_DN9624_c0_g1_i1.mrna1.exon1;Name=TRINITY_DN9624_c0_g1_i1;Parent=TRINITY_DN9624_c0_g1_i1.mrna1;Target=TRINITY_DN9624_c0_g1_i1 23 1 .
scaffold_10	Conpu1	gene	1833217	1833530	.	+	.	ID=TRINITY_DN9624_c0_g1_i1.path1;Name=TRINITY_DN9624_c0_g1_i1
scaffold_10	Conpu1	mRNA	1833217	1833530	.	+	.	ID=TRINITY_DN9624_c0_g1_i1.mrna1;Name=TRINITY_DN9624_c0_g1_i1;Parent=TRINITY_DN9624_c0_g1_i1.path1;coverage=100.0;identity=100.0;matches=265;mismatches=0;indels=0;unknowns=0
scaffold_10	Conpu1	CDS	1833218	1833239	100	+	0	ID=TRINITY_DN9624_c0_g1_i1.mrna1.cds1;Name=TRINITY_DN9624_c0_g1_i1;Parent=TRINITY_DN9624_c0_g1_i1.mrna1;Target=TRINITY_DN9624_c0_g1_i1 23 2 .
scaffold_10	Conpu1	CDS	1833289	1833416	100	+	1	ID=TRINITY_DN9624_c0_g1_i1.mrna1.cds2;Name=TRINITY_DN9624_c0_g1_i1;Parent=TRINITY_DN9624_c0_g1_i1.mrna1;Target=TRINITY_DN9624_c0_g1_i1 151 24 .
scaffold_10	Conpu1	exon	1833289	1833530	100	+	.	ID=TRINITY_DN9624_c0_g1_i1.mrna1.exon2;Name=TRINITY_DN9624_c0_g1_i1;Parent=TRINITY_DN9624_c0_g1_i1.mrna1;Target=TRINITY_DN9624_c0_g1_i1 265 24 .
scaffold_10	Conpu1	exon	1861464	1861543	100	+	.	ID=TRINITY_DN15450_c0_g1_i1.mrna1.exon1;Name=TRINITY_DN15450_c0_g1_i1;Parent=TRINITY_DN15450_c0_g1_i1.mrna1;Target=TRINITY_DN15450_c0_g1_i1 1 80 +
scaffold_10	Conpu1	gene	1861464	1862055	.	+	.	ID=TRINITY_DN15450_c0_g1_i1.path1;Name=TRINITY_DN15450_c0_g1_i1
scaffold_10	Conpu1	mRNA	1861464	1862055	.	+	.	ID=TRINITY_DN15450_c0_g1_i1.mrna1;Name=TRINITY_DN15450_c0_g1_i1;Parent=TRINITY_DN15450_c0_g1_i1.path1;coverage=100.0;identity=100.0;matches=469;mismatches=0;indels=0;unknowns=0
scaffold_10	Conpu1	exon	1861606	1861676	100	+	.	ID=TRINITY_DN15450_c0_g1_i1.mrna1.exon2;Name=TRINITY_DN15450_c0_g1_i1;Parent=TRINITY_DN15450_c0_g1_i1.mrna1;Target=TRINITY_DN15450_c0_g1_i1 81 151 +
scaffold_10	Conpu1	exon	1861738	1862055	100	+	.	ID=TRINITY_DN15450_c0_g1_i1.mrna1.exon3;Name=TRINITY_DN15450_c0_g1_i1;Parent=TRINITY_DN15450_c0_g1_i1.mrna1;Target=TRINITY_DN15450_c0_g1_i1 152 469 +
scaffold_10	Conpu1	CDS	1861804	1862004	100	+	0	ID=TRINITY_DN15450_c0_g1_i1.mrna1.cds1;Name=TRINITY_DN15450_c0_g1_i1;Parent=TRINITY_DN15450_c0_g1_i1.mrna1;Target=TRINITY_DN15450_c0_g1_i1 218 418 +
scaffold_10	Conpu1	exon	1904083	1904412	100	+	.	ID=TRINITY_DN13702_c0_g1_i1.mrna1.exon1;Name=TRINITY_DN13702_c0_g1_i1;Parent=TRINITY_DN13702_c0_g1_i1.mrna1;Target=TRINITY_DN13702_c0_g1_i1 330 1 .
scaffold_10	Conpu1	gene	1904083	1904412	.	+	.	ID=TRINITY_DN13702_c0_g1_i1.path1;Name=TRINITY_DN13702_c0_g1_i1
scaffold_10	Conpu1	mRNA	1904083	1904412	.	+	.	ID=TRINITY_DN13702_c0_g1_i1.mrna1;Name=TRINITY_DN13702_c0_g1_i1;Parent=TRINITY_DN13702_c0_g1_i1.path1;coverage=99.7;identity=100.0;matches=330;mismatches=0;indels=0;unknowns=0
scaffold_10	Conpu1	CDS	1904167	1904286	100	+	0	ID=TRINITY_DN13702_c0_g1_i1.mrna1.cds1;Name=TRINITY_DN13702_c0_g1_i1;Parent=TRINITY_DN13702_c0_g1_i1.mrna1;Target=TRINITY_DN13702_c0_g1_i1 204 85 .
scaffold_10	Conpu1	CDS	1912682	1912780	100	+	0	ID=TRINITY_DN15715_c0_g1_i1.mrna1.cds1;Name=TRINITY_DN15715_c0_g1_i1;Parent=TRINITY_DN15715_c0_g1_i1.mrna1;Target=TRINITY_DN15715_c0_g1_i1 99 1 .
scaffold_10	Conpu1	exon	1912682	1912891	100	+	.	ID=TRINITY_DN15715_c0_g1_i1.mrna1.exon1;Name=TRINITY_DN15715_c0_g1_i1;Parent=TRINITY_DN15715_c0_g1_i1.mrna1;Target=TRINITY_DN15715_c0_g1_i1 210 1 .
scaffold_10	Conpu1	gene	1912682	1912891	.	+	.	ID=TRINITY_DN15715_c0_g1_i1.path1;Name=TRINITY_DN15715_c0_g1_i1
scaffold_10	Conpu1	mRNA	1912682	1912891	.	+	.	ID=TRINITY_DN15715_c0_g1_i1.mrna1;Name=TRINITY_DN15715_c0_g1_i1;Parent=TRINITY_DN15715_c0_g1_i1.path1;coverage=100.0;identity=100.0;matches=210;mismatches=0;indels=0;unknowns=0
scaffold_10	Conpu1	CDS	1915199	1915372	100	+	0	ID=TRINITY_DN13320_c0_g1_i1.mrna1.cds1;Name=TRINITY_DN13320_c0_g1_i1;Parent=TRINITY_DN13320_c0_g1_i1.mrna1;Target=TRINITY_DN13320_c0_g1_i1 174 1 .
scaffold_10	Conpu1	exon	1915199	1915405	100	+	.	ID=TRINITY_DN13320_c0_g1_i1.mrna1.exon1;Name=TRINITY_DN13320_c0_g1_i1;Parent=TRINITY_DN13320_c0_g1_i1.mrna1;Target=TRINITY_DN13320_c0_g1_i1 207 1 .
scaffold_10	Conpu1	gene	1915199	1915405	.	+	.	ID=TRINITY_DN13320_c0_g1_i1.path1;Name=TRINITY_DN13320_c0_g1_i1
scaffold_10	Conpu1	mRNA	1915199	1915405	.	+	.	ID=TRINITY_DN13320_c0_g1_i1.mrna1;Name=TRINITY_DN13320_c0_g1_i1;Parent=TRINITY_DN13320_c0_g1_i1.path1;coverage=100.0;identity=100.0;matches=207;mismatches=0;indels=0;unknowns=0
scaffold_10	Conpu1	CDS	1928642	1928857	100	+	0	ID=TRINITY_DN15246_c0_g1_i1.mrna1.cds1;Name=TRINITY_DN15246_c0_g1_i1;Parent=TRINITY_DN15246_c0_g1_i1.mrna1;Target=TRINITY_DN15246_c0_g1_i1 216 1 .
scaffold_10	Conpu1	exon	1928642	1928859	100	+	.	ID=TRINITY_DN15246_c0_g1_i1.mrna1.exon1;Name=TRINITY_DN15246_c0_g1_i1;Parent=TRINITY_DN15246_c0_g1_i1.mrna1;Target=TRINITY_DN15246_c0_g1_i1 218 1 .
scaffold_10	Conpu1	gene	1928642	1928859	.	+	.	ID=TRINITY_DN15246_c0_g1_i1.path1;Name=TRINITY_DN15246_c0_g1_i1
scaffold_10	Conpu1	mRNA	1928642	1928859	.	+	.	ID=TRINITY_DN15246_c0_g1_i1.mrna1;Name=TRINITY_DN15246_c0_g1_i1;Parent=TRINITY_DN15246_c0_g1_i1.path1;coverage=99.5;identity=100.0;matches=218;mismatches=0;indels=0;unknowns=0
scaffold_10	Conpu1	exon	1939710	1939922	100	+	.	ID=TRINITY_DN2286_c0_g1_i4.mrna1.exon1;Name=TRINITY_DN2286_c0_g1_i4;Parent=TRINITY_DN2286_c0_g1_i4.mrna1;Target=TRINITY_DN2286_c0_g1_i4 1 213 +
scaffold_10	Conpu1	exon	1939710	1940377	100	+	.	ID=TRINITY_DN2286_c0_g1_i3.mrna1.exon1;Name=TRINITY_DN2286_c0_g1_i3;Parent=TRINITY_DN2286_c0_g1_i3.mrna1;Target=TRINITY_DN2286_c0_g1_i3 1 668 +
scaffold_10	Conpu1	gene	1939710	1941655	.	+	.	ID=TRINITY_DN2286_c0_g1_i3.path1;Name=TRINITY_DN2286_c0_g1_i3
scaffold_10	Conpu1	gene	1939710	1941655	.	+	.	ID=TRINITY_DN2286_c0_g1_i4.path1;Name=TRINITY_DN2286_c0_g1_i4
scaffold_10	Conpu1	mRNA	1939710	1941655	.	+	.	ID=TRINITY_DN2286_c0_g1_i3.mrna1;Name=TRINITY_DN2286_c0_g1_i3;Parent=TRINITY_DN2286_c0_g1_i3.path1;coverage=100.0;identity=100.0;matches=1702;mismatches=0;indels=0;unknowns=0
scaffold_10	Conpu1	mRNA	1939710	1941655	.	+	.	ID=TRINITY_DN2286_c0_g1_i4.mrna1;Name=TRINITY_DN2286_c0_g1_i4;Parent=TRINITY_DN2286_c0_g1_i4.path1;coverage=100.0;identity=100.0;matches=1632;mismatches=0;indels=0;unknowns=0
scaffold_10	Conpu1	CDS	1939711	1939922	100	+	0	ID=TRINITY_DN2286_c0_g1_i4.mrna1.cds1;Name=TRINITY_DN2286_c0_g1_i4;Parent=TRINITY_DN2286_c0_g1_i4.mrna1;Target=TRINITY_DN2286_c0_g1_i4 2 213 +
scaffold_10	Conpu1	CDS	1939711	1939944	100	+	0	ID=TRINITY_DN2286_c0_g1_i3.mrna1.cds1;Name=TRINITY_DN2286_c0_g1_i3;Parent=TRINITY_DN2286_c0_g1_i3.mrna1;Target=TRINITY_DN2286_c0_g1_i3 2 235 +
scaffold_10	Conpu1	CDS	1939993	1940014	100	+	2	ID=TRINITY_DN2286_c0_g1_i4.mrna1.cds2;Name=TRINITY_DN2286_c0_g1_i4;Parent=TRINITY_DN2286_c0_g1_i4.mrna1;Target=TRINITY_DN2286_c0_g1_i4 214 235 +
scaffold_10	Conpu1	exon	1939993	1940377	100	+	.	ID=TRINITY_DN2286_c0_g1_i4.mrna1.exon2;Name=TRINITY_DN2286_c0_g1_i4;Parent=TRINITY_DN2286_c0_g1_i4.mrna1;Target=TRINITY_DN2286_c0_g1_i4 214 598 +
scaffold_10	Conpu1	exon	1940479	1940630	100	+	.	ID=TRINITY_DN2286_c0_g1_i3.mrna1.exon2;Name=TRINITY_DN2286_c0_g1_i3;Parent=TRINITY_DN2286_c0_g1_i3.mrna1;Target=TRINITY_DN2286_c0_g1_i3 669 820 +
scaffold_10	Conpu1	exon	1940479	1940630	100	+	.	ID=TRINITY_DN2286_c0_g1_i4.mrna1.exon3;Name=TRINITY_DN2286_c0_g1_i4;Parent=TRINITY_DN2286_c0_g1_i4.mrna1;Target=TRINITY_DN2286_c0_g1_i4 599 750 +
scaffold_10	Conpu1	exon	1940718	1941160	100	+	.	ID=TRINITY_DN2286_c0_g1_i3.mrna1.exon3;Name=TRINITY_DN2286_c0_g1_i3;Parent=TRINITY_DN2286_c0_g1_i3.mrna1;Target=TRINITY_DN2286_c0_g1_i3 821 1263 +
scaffold_10	Conpu1	exon	1940718	1941160	100	+	.	ID=TRINITY_DN2286_c0_g1_i4.mrna1.exon4;Name=TRINITY_DN2286_c0_g1_i4;Parent=TRINITY_DN2286_c0_g1_i4.mrna1;Target=TRINITY_DN2286_c0_g1_i4 751 1193 +
scaffold_10	Conpu1	exon	1941217	1941655	100	+	.	ID=TRINITY_DN2286_c0_g1_i3.mrna1.exon4;Name=TRINITY_DN2286_c0_g1_i3;Parent=TRINITY_DN2286_c0_g1_i3.mrna1;Target=TRINITY_DN2286_c0_g1_i3 1264 1702 +
scaffold_10	Conpu1	exon	1941217	1941655	100	+	.	ID=TRINITY_DN2286_c0_g1_i4.mrna1.exon5;Name=TRINITY_DN2286_c0_g1_i4;Parent=TRINITY_DN2286_c0_g1_i4.mrna1;Target=TRINITY_DN2286_c0_g1_i4 1194 1632 +
scaffold_10	Conpu1	exon	1953443	1954125	100	-	.	ID=TRINITY_DN8673_c0_g1_i1.mrna1.exon1;Name=TRINITY_DN8673_c0_g1_i1;Parent=TRINITY_DN8673_c0_g1_i1.mrna1;Target=TRINITY_DN8673_c0_g1_i1 683 1 .
scaffold_10	Conpu1	gene	1953443	1954125	.	-	.	ID=TRINITY_DN8673_c0_g1_i1.path1;Name=TRINITY_DN8673_c0_g1_i1
scaffold_10	Conpu1	mRNA	1953443	1954125	.	-	.	ID=TRINITY_DN8673_c0_g1_i1.mrna1;Name=TRINITY_DN8673_c0_g1_i1;Parent=TRINITY_DN8673_c0_g1_i1.path1;coverage=100.0;identity=100.0;matches=683;mismatches=0;indels=0;unknowns=0
scaffold_10	Conpu1	CDS	1953855	1954124	100	-	0	ID=TRINITY_DN8673_c0_g1_i1.mrna1.cds1;Name=TRINITY_DN8673_c0_g1_i1;Parent=TRINITY_DN8673_c0_g1_i1.mrna1;Target=TRINITY_DN8673_c0_g1_i1 271 2 .
scaffold_10	Conpu1	exon	1954079	1954586	100	-	.	ID=TRINITY_DN6085_c0_g1_i1.mrna1.exon2;Name=TRINITY_DN6085_c0_g1_i1;Parent=TRINITY_DN6085_c0_g1_i1.mrna1;Target=TRINITY_DN6085_c0_g1_i1 217 724 +
scaffold_10	Conpu1	gene	1954079	1954856	.	-	.	ID=TRINITY_DN6085_c0_g1_i1.path1;Name=TRINITY_DN6085_c0_g1_i1
scaffold_10	Conpu1	mRNA	1954079	1954856	.	-	.	ID=TRINITY_DN6085_c0_g1_i1.mrna1;Name=TRINITY_DN6085_c0_g1_i1;Parent=TRINITY_DN6085_c0_g1_i1.path1;coverage=99.9;identity=100.0;matches=724;mismatches=0;indels=0;unknowns=0
scaffold_10	Conpu1	CDS	1954395	1954571	100	-	0	ID=TRINITY_DN6085_c0_g1_i1.mrna1.cds1;Name=TRINITY_DN6085_c0_g1_i1;Parent=TRINITY_DN6085_c0_g1_i1.mrna1;Target=TRINITY_DN6085_c0_g1_i1 232 408 +
scaffold_10	Conpu1	exon	1954641	1954856	100	-	.	ID=TRINITY_DN6085_c0_g1_i1.mrna1.exon1;Name=TRINITY_DN6085_c0_g1_i1;Parent=TRINITY_DN6085_c0_g1_i1.mrna1;Target=TRINITY_DN6085_c0_g1_i1 1 216 +
scaffold_10	Conpu1	exon	2067808	2068259	100	-	.	ID=TRINITY_DN11956_c0_g1_i1.mrna1.exon1;Name=TRINITY_DN11956_c0_g1_i1;Parent=TRINITY_DN11956_c0_g1_i1.mrna1;Target=TRINITY_DN11956_c0_g1_i1 452 1 .
scaffold_10	Conpu1	gene	2067808	2068259	.	-	.	ID=TRINITY_DN11956_c0_g1_i1.path1;Name=TRINITY_DN11956_c0_g1_i1
scaffold_10	Conpu1	mRNA	2067808	2068259	.	-	.	ID=TRINITY_DN11956_c0_g1_i1.mrna1;Name=TRINITY_DN11956_c0_g1_i1;Parent=TRINITY_DN11956_c0_g1_i1.path1;coverage=100.0;identity=100.0;matches=452;mismatches=0;indels=0;unknowns=0
scaffold_10	Conpu1	CDS	2067911	2068084	100	-	0	ID=TRINITY_DN11956_c0_g1_i1.mrna1.cds1;Name=TRINITY_DN11956_c0_g1_i1;Parent=TRINITY_DN11956_c0_g1_i1.mrna1;Target=TRINITY_DN11956_c0_g1_i1 349 176 .
scaffold_10	Conpu1	exon	2086303	2086524	99	-	.	ID=TRINITY_DN13232_c0_g1_i1.mrna1.exon1;Name=TRINITY_DN13232_c0_g1_i1;Parent=TRINITY_DN13232_c0_g1_i1.mrna1;Target=TRINITY_DN13232_c0_g1_i1 222 1 .
scaffold_10	Conpu1	gene	2086303	2086524	.	-	.	ID=TRINITY_DN13232_c0_g1_i1.path1;Name=TRINITY_DN13232_c0_g1_i1
scaffold_10	Conpu1	mRNA	2086303	2086524	.	-	.	ID=TRINITY_DN13232_c0_g1_i1.mrna1;Name=TRINITY_DN13232_c0_g1_i1;Parent=TRINITY_DN13232_c0_g1_i1.path1;coverage=100.0;identity=99.5;matches=221;mismatches=1;indels=0;unknowns=0
scaffold_10	Conpu1	CDS	2086363	2086440	100	-	0	ID=TRINITY_DN13232_c0_g1_i1.mrna1.cds1;Name=TRINITY_DN13232_c0_g1_i1;Parent=TRINITY_DN13232_c0_g1_i1.mrna1;Target=TRINITY_DN13232_c0_g1_i1 162 85 .
scaffold_11	Conpu1	exon	6524	6768	100	+	.	ID=TRINITY_DN16702_c0_g1_i1.mrna1.exon1;Name=TRINITY_DN16702_c0_g1_i1;Parent=TRINITY_DN16702_c0_g1_i1.mrna1;Target=TRINITY_DN16702_c0_g1_i1 245 1 .
scaffold_11	Conpu1	gene	6524	6768	.	+	.	ID=TRINITY_DN16702_c0_g1_i1.path1;Name=TRINITY_DN16702_c0_g1_i1
scaffold_11	Conpu1	mRNA	6524	6768	.	+	.	ID=TRINITY_DN16702_c0_g1_i1.mrna1;Name=TRINITY_DN16702_c0_g1_i1;Parent=TRINITY_DN16702_c0_g1_i1.path1;coverage=100.0;identity=100.0;matches=245;mismatches=0;indels=0;unknowns=0
scaffold_11	Conpu1	CDS	6526	6633	100	+	0	ID=TRINITY_DN16702_c0_g1_i1.mrna1.cds1;Name=TRINITY_DN16702_c0_g1_i1;Parent=TRINITY_DN16702_c0_g1_i1.mrna1;Target=TRINITY_DN16702_c0_g1_i1 110 3 .
scaffold_11	Conpu1	exon	60684	61020	100	-	.	ID=TRINITY_DN4745_c0_g1_i1.mrna1.exon1;Name=TRINITY_DN4745_c0_g1_i1;Parent=TRINITY_DN4745_c0_g1_i1.mrna1;Target=TRINITY_DN4745_c0_g1_i1 337 1 .
scaffold_11	Conpu1	gene	60684	61020	.	-	.	ID=TRINITY_DN4745_c0_g1_i1.path1;Name=TRINITY_DN4745_c0_g1_i1
scaffold_11	Conpu1	mRNA	60684	61020	.	-	.	ID=TRINITY_DN4745_c0_g1_i1.mrna1;Name=TRINITY_DN4745_c0_g1_i1;Parent=TRINITY_DN4745_c0_g1_i1.path1;coverage=100.0;identity=100.0;matches=337;mismatches=0;indels=0;unknowns=0
scaffold_11	Conpu1	CDS	60906	61019	100	-	0	ID=TRINITY_DN4745_c0_g1_i1.mrna1.cds1;Name=TRINITY_DN4745_c0_g1_i1;Parent=TRINITY_DN4745_c0_g1_i1.mrna1;Target=TRINITY_DN4745_c0_g1_i1 115 2 .
scaffold_11	Conpu1	exon	63433	63650	100	-	.	ID=TRINITY_DN6280_c0_g1_i1.mrna1.exon1;Name=TRINITY_DN6280_c0_g1_i1;Parent=TRINITY_DN6280_c0_g1_i1.mrna1;Target=TRINITY_DN6280_c0_g1_i1 218 1 .
scaffold_11	Conpu1	gene	63433	63650	.	-	.	ID=TRINITY_DN6280_c0_g1_i1.path1;Name=TRINITY_DN6280_c0_g1_i1
scaffold_11	Conpu1	mRNA	63433	63650	.	-	.	ID=TRINITY_DN6280_c0_g1_i1.mrna1;Name=TRINITY_DN6280_c0_g1_i1;Parent=TRINITY_DN6280_c0_g1_i1.path1;coverage=100.0;identity=100.0;matches=218;mismatches=0;indels=0;unknowns=0
scaffold_11	Conpu1	CDS	63568	63648	100	-	0	ID=TRINITY_DN6280_c0_g1_i1.mrna1.cds1;Name=TRINITY_DN6280_c0_g1_i1;Parent=TRINITY_DN6280_c0_g1_i1.mrna1;Target=TRINITY_DN6280_c0_g1_i1 83 3 .
scaffold_11	Conpu1	exon	107636	107793	100	+	.	ID=TRINITY_DN12060_c0_g1_i1.mrna1.exon1;Name=TRINITY_DN12060_c0_g1_i1;Parent=TRINITY_DN12060_c0_g1_i1.mrna1;Target=TRINITY_DN12060_c0_g1_i1 1 158 +
scaffold_11	Conpu1	gene	107636	107945	.	+	.	ID=TRINITY_DN12060_c0_g1_i1.path1;Name=TRINITY_DN12060_c0_g1_i1
scaffold_11	Conpu1	mRNA	107636	107945	.	+	.	ID=TRINITY_DN12060_c0_g1_i1.mrna1;Name=TRINITY_DN12060_c0_g1_i1;Parent=TRINITY_DN12060_c0_g1_i1.path1;coverage=100.0;identity=100.0;matches=247;mismatches=0;indels=0;unknowns=0
scaffold_11	Conpu1	CDS	107637	107792	100	+	0	ID=TRINITY_DN12060_c0_g1_i1.mrna1.cds1;Name=TRINITY_DN12060_c0_g1_i1;Parent=TRINITY_DN12060_c0_g1_i1.mrna1;Target=TRINITY_DN12060_c0_g1_i1 2 157 +
scaffold_11	Conpu1	exon	107857	107945	100	+	.	ID=TRINITY_DN12060_c0_g1_i1.mrna1.exon2;Name=TRINITY_DN12060_c0_g1_i1;Parent=TRINITY_DN12060_c0_g1_i1.mrna1;Target=TRINITY_DN12060_c0_g1_i1 159 247 +
scaffold_11	Conpu1	exon	107930	108298	100	-	.	ID=TRINITY_DN11176_c0_g1_i1.mrna1.exon1;Name=TRINITY_DN11176_c0_g1_i1;Parent=TRINITY_DN11176_c0_g1_i1.mrna1;Target=TRINITY_DN11176_c0_g1_i1 369 1 .
scaffold_11	Conpu1	gene	107930	108298	.	-	.	ID=TRINITY_DN11176_c0_g1_i1.path1;Name=TRINITY_DN11176_c0_g1_i1
scaffold_11	Conpu1	mRNA	107930	108298	.	-	.	ID=TRINITY_DN11176_c0_g1_i1.mrna1;Name=TRINITY_DN11176_c0_g1_i1;Parent=TRINITY_DN11176_c0_g1_i1.path1;coverage=100.0;identity=100.0;matches=369;mismatches=0;indels=0;unknowns=0
scaffold_11	Conpu1	CDS	108230	108298	100	-	0	ID=TRINITY_DN11176_c0_g1_i1.mrna1.cds1;Name=TRINITY_DN11176_c0_g1_i1;Parent=TRINITY_DN11176_c0_g1_i1.mrna1;Target=TRINITY_DN11176_c0_g1_i1 69 1 .
scaffold_11	Conpu1	exon	126750	126785	100	+	.	ID=TRINITY_DN6034_c0_g1_i1.mrna1.exon1;Name=TRINITY_DN6034_c0_g1_i1;Parent=TRINITY_DN6034_c0_g1_i1.mrna1;Target=TRINITY_DN6034_c0_g1_i1 1 36 +
scaffold_11	Conpu1	gene	126750	127154	.	+	.	ID=TRINITY_DN6034_c0_g1_i1.path1;Name=TRINITY_DN6034_c0_g1_i1
scaffold_11	Conpu1	mRNA	126750	127154	.	+	.	ID=TRINITY_DN6034_c0_g1_i1.mrna1;Name=TRINITY_DN6034_c0_g1_i1;Parent=TRINITY_DN6034_c0_g1_i1.path1;coverage=100.0;identity=100.0;matches=274;mismatches=0;indels=0;unknowns=0
scaffold_11	Conpu1	exon	126917	127154	100	+	.	ID=TRINITY_DN6034_c0_g1_i1.mrna1.exon2;Name=TRINITY_DN6034_c0_g1_i1;Parent=TRINITY_DN6034_c0_g1_i1.mrna1;Target=TRINITY_DN6034_c0_g1_i1 37 274 +
scaffold_11	Conpu1	CDS	126962	127129	100	+	0	ID=TRINITY_DN6034_c0_g1_i1.mrna1.cds1;Name=TRINITY_DN6034_c0_g1_i1;Parent=TRINITY_DN6034_c0_g1_i1.mrna1;Target=TRINITY_DN6034_c0_g1_i1 82 249 +
scaffold_11	Conpu1	exon	134540	134759	99	-	.	ID=TRINITY_DN9386_c0_g1_i1.mrna1.exon1;Name=TRINITY_DN9386_c0_g1_i1;Parent=TRINITY_DN9386_c0_g1_i1.mrna1;Target=TRINITY_DN9386_c0_g1_i1 220 1 .
scaffold_11	Conpu1	gene	134540	134759	.	-	.	ID=TRINITY_DN9386_c0_g1_i1.path1;Name=TRINITY_DN9386_c0_g1_i1
scaffold_11	Conpu1	mRNA	134540	134759	.	-	.	ID=TRINITY_DN9386_c0_g1_i1.mrna1;Name=TRINITY_DN9386_c0_g1_i1;Parent=TRINITY_DN9386_c0_g1_i1.path1;coverage=100.0;identity=99.5;matches=219;mismatches=1;indels=0;unknowns=0
scaffold_11	Conpu1	CDS	134615	134758	100	-	0	ID=TRINITY_DN9386_c0_g1_i1.mrna1.cds1;Name=TRINITY_DN9386_c0_g1_i1;Parent=TRINITY_DN9386_c0_g1_i1.mrna1;Target=TRINITY_DN9386_c0_g1_i1 145 2 .
scaffold_11	Conpu1	exon	151245	151450	100	-	.	ID=TRINITY_DN5622_c0_g1_i1.mrna1.exon3;Name=TRINITY_DN5622_c0_g1_i1;Parent=TRINITY_DN5622_c0_g1_i1.mrna1;Target=TRINITY_DN5622_c0_g1_i1 1 206 -
scaffold_11	Conpu1	gene	151245	151676	.	-	.	ID=TRINITY_DN5622_c0_g1_i1.path1;Name=TRINITY_DN5622_c0_g1_i1
scaffold_11	Conpu1	mRNA	151245	151676	.	-	.	ID=TRINITY_DN5622_c0_g1_i1.mrna1;Name=TRINITY_DN5622_c0_g1_i1;Parent=TRINITY_DN5622_c0_g1_i1.path1;coverage=98.4;identity=100.0;matches=310;mismatches=0;indels=0;unknowns=0
scaffold_11	Conpu1	CDS	151298	151450	100	-	0	ID=TRINITY_DN5622_c0_g1_i1.mrna1.cds3;Name=TRINITY_DN5622_c0_g1_i1;Parent=TRINITY_DN5622_c0_g1_i1.mrna1;Target=TRINITY_DN5622_c0_g1_i1 54 206 .
scaffold_11	Conpu1	CDS	151500	151558	100	-	1	ID=TRINITY_DN5622_c0_g1_i1.mrna1.cds2;Name=TRINITY_DN5622_c0_g1_i1;Parent=TRINITY_DN5622_c0_g1_i1.mrna1;Target=TRINITY_DN5622_c0_g1_i1 207 265 .
scaffold_11	Conpu1	exon	151500	151558	100	-	.	ID=TRINITY_DN5622_c0_g1_i1.mrna1.exon2;Name=TRINITY_DN5622_c0_g1_i1;Parent=TRINITY_DN5622_c0_g1_i1.mrna1;Target=TRINITY_DN5622_c0_g1_i1 207 265 -
scaffold_11	Conpu1	CDS	151632	151674	100	-	0	ID=TRINITY_DN5622_c0_g1_i1.mrna1.cds1;Name=TRINITY_DN5622_c0_g1_i1;Parent=TRINITY_DN5622_c0_g1_i1.mrna1;Target=TRINITY_DN5622_c0_g1_i1 266 308 .
scaffold_11	Conpu1	exon	151632	151676	100	-	.	ID=TRINITY_DN5622_c0_g1_i1.mrna1.exon1;Name=TRINITY_DN5622_c0_g1_i1;Parent=TRINITY_DN5622_c0_g1_i1.mrna1;Target=TRINITY_DN5622_c0_g1_i1 266 310 -
scaffold_11	Conpu1	exon	244024	244250	100	+	.	ID=TRINITY_DN8896_c0_g1_i1.mrna1.exon1;Name=TRINITY_DN8896_c0_g1_i1;Parent=TRINITY_DN8896_c0_g1_i1.mrna1;Target=TRINITY_DN8896_c0_g1_i1 227 1 .
scaffold_11	Conpu1	gene	244024	244250	.	+	.	ID=TRINITY_DN8896_c0_g1_i1.path1;Name=TRINITY_DN8896_c0_g1_i1
scaffold_11	Conpu1	mRNA	244024	244250	.	+	.	ID=TRINITY_DN8896_c0_g1_i1.mrna1;Name=TRINITY_DN8896_c0_g1_i1;Parent=TRINITY_DN8896_c0_g1_i1.path1;coverage=100.0;identity=100.0;matches=227;mismatches=0;indels=0;unknowns=0
scaffold_11	Conpu1	CDS	244025	244120	100	+	0	ID=TRINITY_DN8896_c0_g1_i1.mrna1.cds1;Name=TRINITY_DN8896_c0_g1_i1;Parent=TRINITY_DN8896_c0_g1_i1.mrna1;Target=TRINITY_DN8896_c0_g1_i1 97 2 .
scaffold_11	Conpu1	exon	259073	259297	100	+	.	ID=TRINITY_DN8876_c0_g1_i1.mrna1.exon1;Name=TRINITY_DN8876_c0_g1_i1;Parent=TRINITY_DN8876_c0_g1_i1.mrna1;Target=TRINITY_DN8876_c0_g1_i1 225 1 .
scaffold_11	Conpu1	gene	259073	259297	.	+	.	ID=TRINITY_DN8876_c0_g1_i1.path1;Name=TRINITY_DN8876_c0_g1_i1
scaffold_11	Conpu1	mRNA	259073	259297	.	+	.	ID=TRINITY_DN8876_c0_g1_i1.mrna1;Name=TRINITY_DN8876_c0_g1_i1;Parent=TRINITY_DN8876_c0_g1_i1.path1;coverage=100.0;identity=100.0;matches=225;mismatches=0;indels=0;unknowns=0
scaffold_11	Conpu1	CDS	259075	259296	100	+	0	ID=TRINITY_DN8876_c0_g1_i1.mrna1.cds1;Name=TRINITY_DN8876_c0_g1_i1;Parent=TRINITY_DN8876_c0_g1_i1.mrna1;Target=TRINITY_DN8876_c0_g1_i1 224 3 .
scaffold_11	Conpu1	exon	259303	260316	100	-	.	ID=TRINITY_DN15403_c0_g1_i1.mrna1.exon1;Name=TRINITY_DN15403_c0_g1_i1;Parent=TRINITY_DN15403_c0_g1_i1.mrna1;Target=TRINITY_DN15403_c0_g1_i1 1014 1 .
scaffold_11	Conpu1	gene	259303	260316	.	-	.	ID=TRINITY_DN15403_c0_g1_i1.path1;Name=TRINITY_DN15403_c0_g1_i1
scaffold_11	Conpu1	mRNA	259303	260316	.	-	.	ID=TRINITY_DN15403_c0_g1_i1.mrna1;Name=TRINITY_DN15403_c0_g1_i1;Parent=TRINITY_DN15403_c0_g1_i1.path1;coverage=100.0;identity=100.0;matches=1014;mismatches=0;indels=0;unknowns=0
scaffold_11	Conpu1	CDS	259305	259589	100	-	0	ID=TRINITY_DN15403_c0_g1_i1.mrna1.cds1;Name=TRINITY_DN15403_c0_g1_i1;Parent=TRINITY_DN15403_c0_g1_i1.mrna1;Target=TRINITY_DN15403_c0_g1_i1 1012 728 .
scaffold_11	Conpu1	exon	269370	269583	100	+	.	ID=TRINITY_DN15513_c0_g1_i1.mrna1.exon1;Name=TRINITY_DN15513_c0_g1_i1;Parent=TRINITY_DN15513_c0_g1_i1.mrna1;Target=TRINITY_DN15513_c0_g1_i1 214 1 .
scaffold_11	Conpu1	gene	269370	269583	.	+	.	ID=TRINITY_DN15513_c0_g1_i1.path1;Name=TRINITY_DN15513_c0_g1_i1
scaffold_11	Conpu1	mRNA	269370	269583	.	+	.	ID=TRINITY_DN15513_c0_g1_i1.mrna1;Name=TRINITY_DN15513_c0_g1_i1;Parent=TRINITY_DN15513_c0_g1_i1.path1;coverage=100.0;identity=100.0;matches=214;mismatches=0;indels=0;unknowns=0
scaffold_11	Conpu1	CDS	269371	269550	100	+	0	ID=TRINITY_DN15513_c0_g1_i1.mrna1.cds1;Name=TRINITY_DN15513_c0_g1_i1;Parent=TRINITY_DN15513_c0_g1_i1.mrna1;Target=TRINITY_DN15513_c0_g1_i1 181 2 .
scaffold_11	Conpu1	exon	269570	269932	100	+	.	ID=TRINITY_DN11102_c0_g1_i1.mrna1.exon1;Name=TRINITY_DN11102_c0_g1_i1;Parent=TRINITY_DN11102_c0_g1_i1.mrna1;Target=TRINITY_DN11102_c0_g1_i1 363 1 .
scaffold_11	Conpu1	gene	269570	269932	.	+	.	ID=TRINITY_DN11102_c0_g1_i1.path1;Name=TRINITY_DN11102_c0_g1_i1
scaffold_11	Conpu1	mRNA	269570	269932	.	+	.	ID=TRINITY_DN11102_c0_g1_i1.mrna1;Name=TRINITY_DN11102_c0_g1_i1;Parent=TRINITY_DN11102_c0_g1_i1.path1;coverage=100.0;identity=100.0;matches=363;mismatches=0;indels=0;unknowns=0
scaffold_11	Conpu1	CDS	269626	269691	100	+	0	ID=TRINITY_DN11102_c0_g1_i1.mrna1.cds1;Name=TRINITY_DN11102_c0_g1_i1;Parent=TRINITY_DN11102_c0_g1_i1.mrna1;Target=TRINITY_DN11102_c0_g1_i1 122 57 .
scaffold_11	Conpu1	exon	363718	363935	100	+	.	ID=TRINITY_DN11504_c0_g1_i1.mrna1.exon1;Name=TRINITY_DN11504_c0_g1_i1;Parent=TRINITY_DN11504_c0_g1_i1.mrna1;Target=TRINITY_DN11504_c0_g1_i1 218 1 .
scaffold_11	Conpu1	gene	363718	363935	.	+	.	ID=TRINITY_DN11504_c0_g1_i1.path1;Name=TRINITY_DN11504_c0_g1_i1
scaffold_11	Conpu1	mRNA	363718	363935	.	+	.	ID=TRINITY_DN11504_c0_g1_i1.mrna1;Name=TRINITY_DN11504_c0_g1_i1;Parent=TRINITY_DN11504_c0_g1_i1.path1;coverage=100.0;identity=100.0;matches=218;mismatches=0;indels=0;unknowns=0
scaffold_11	Conpu1	CDS	363720	363818	100	+	0	ID=TRINITY_DN11504_c0_g1_i1.mrna1.cds1;Name=TRINITY_DN11504_c0_g1_i1;Parent=TRINITY_DN11504_c0_g1_i1.mrna1;Target=TRINITY_DN11504_c0_g1_i1 101 3 .
scaffold_11	Conpu1	exon	371521	371891	97	+	.	ID=TRINITY_DN15637_c0_g1_i1.mrna1.exon1;Name=TRINITY_DN15637_c0_g1_i1;Parent=TRINITY_DN15637_c0_g1_i1.mrna1;Target=TRINITY_DN15637_c0_g1_i1 371 1 .
scaffold_11	Conpu1	gene	371521	371891	.	+	.	ID=TRINITY_DN15637_c0_g1_i1.path1;Name=TRINITY_DN15637_c0_g1_i1
scaffold_11	Conpu1	mRNA	371521	371891	.	+	.	ID=TRINITY_DN15637_c0_g1_i1.mrna1;Name=TRINITY_DN15637_c0_g1_i1;Parent=TRINITY_DN15637_c0_g1_i1.path1;coverage=100.0;identity=97.3;matches=361;mismatches=10;indels=0;unknowns=0
scaffold_11	Conpu1	CDS	371523	371609	100	+	0	ID=TRINITY_DN15637_c0_g1_i1.mrna1.cds1;Name=TRINITY_DN15637_c0_g1_i1;Parent=TRINITY_DN15637_c0_g1_i1.mrna1;Target=TRINITY_DN15637_c0_g1_i1 89 3 .
scaffold_11	Conpu1	exon	378964	379202	100	+	.	ID=TRINITY_DN16712_c0_g1_i1.mrna1.exon1;Name=TRINITY_DN16712_c0_g1_i1;Parent=TRINITY_DN16712_c0_g1_i1.mrna1;Target=TRINITY_DN16712_c0_g1_i1 239 1 .
scaffold_11	Conpu1	gene	378964	379202	.	+	.	ID=TRINITY_DN16712_c0_g1_i1.path1;Name=TRINITY_DN16712_c0_g1_i1
scaffold_11	Conpu1	mRNA	378964	379202	.	+	.	ID=TRINITY_DN16712_c0_g1_i1.mrna1;Name=TRINITY_DN16712_c0_g1_i1;Parent=TRINITY_DN16712_c0_g1_i1.path1;coverage=100.0;identity=100.0;matches=239;mismatches=0;indels=0;unknowns=0
scaffold_11	Conpu1	CDS	378966	379151	100	+	0	ID=TRINITY_DN16712_c0_g1_i1.mrna1.cds1;Name=TRINITY_DN16712_c0_g1_i1;Parent=TRINITY_DN16712_c0_g1_i1.mrna1;Target=TRINITY_DN16712_c0_g1_i1 188 3 .
scaffold_11	Conpu1	exon	417001	417223	100	+	.	ID=TRINITY_DN9935_c0_g1_i1.mrna1.exon1;Name=TRINITY_DN9935_c0_g1_i1;Parent=TRINITY_DN9935_c0_g1_i1.mrna1;Target=TRINITY_DN9935_c0_g1_i1 223 1 .
scaffold_11	Conpu1	gene	417001	417223	.	+	.	ID=TRINITY_DN9935_c0_g1_i1.path1;Name=TRINITY_DN9935_c0_g1_i1
scaffold_11	Conpu1	mRNA	417001	417223	.	+	.	ID=TRINITY_DN9935_c0_g1_i1.mrna1;Name=TRINITY_DN9935_c0_g1_i1;Parent=TRINITY_DN9935_c0_g1_i1.path1;coverage=100.0;identity=100.0;matches=223;mismatches=0;indels=0;unknowns=0
scaffold_11	Conpu1	CDS	417002	417208	100	+	0	ID=TRINITY_DN9935_c0_g1_i1.mrna1.cds1;Name=TRINITY_DN9935_c0_g1_i1;Parent=TRINITY_DN9935_c0_g1_i1.mrna1;Target=TRINITY_DN9935_c0_g1_i1 208 2 .
scaffold_11	Conpu1	exon	439074	439234	100	+	.	ID=TRINITY_DN9612_c0_g1_i1.mrna1.exon1;Name=TRINITY_DN9612_c0_g1_i1;Parent=TRINITY_DN9612_c0_g1_i1.mrna1;Target=TRINITY_DN9612_c0_g1_i1 1 161 +
scaffold_11	Conpu1	gene	439074	439354	.	+	.	ID=TRINITY_DN9612_c0_g1_i1.path1;Name=TRINITY_DN9612_c0_g1_i1
[truncated: 11,091 more rows]
