# Supplementary material for: Distribution, Characteristics, and Regulatory Potential of Long Noncoding RNAs in Brown-Rot Fungi
Source: Int J Genomics. 2019 May 2;2019:9702342. doi: 10.1155/2019/9702342 (PMC6525899; doi:10.1155/2019/9702342)
Supplement: Supplementary 6 — Table S6: annotation and expression ratios of gene-lncRNA pairs in C. puteana and S. lacrymans. [file 9702342.f6.xlsx]

## Sheet: C. puteana
scaffold	start	end	Protein ID	gene strand	lncRNA	lncRNA strand	distance	lncRNA ratio	gene ratio
scaffold_1	3962137	3962590	44842	-	TRINITY_DN9899_c0_g1_i1	+	-364	-0.0833557	-1.28635			Same expression trend
scaffold_3	3080038	3080960	50502	-	TRINITY_DN14683_c0_g1_i1	+	-455	-0.113925	-1.05709			opposite expression trend
scaffold_4	3089897	3091234	51805	+	TRINITY_DN15459_c0_g1_i1	+	-113	-0.25891	-1.32164
scaffold_16	709479	712037	65796	+	TRINITY_DN16725_c0_g1_i1	-	-379	-0.502724	-1.17063
scaffold_2	2874188	2875723	70356	+	TRINITY_DN8979_c0_g1_i1	+	-366	-1.30043	-1.42905
scaffold_13	177209	179160	76224	+	TRINITY_DN7459_c0_g1_i1	-	-214	-0.864507	-2.16283
scaffold_3	505732	508117	80341	-	TRINITY_DN7875_c0_g1_i1	+	-201	-0.214108	-1.12807
scaffold_4	1430168	1431112	81112	-	TRINITY_DN14037_c0_g1_i1	+	-246	-0.794589	-2.42878
scaffold_6	1056086	1059243	82255	+	TRINITY_DN6046_c0_g1_i1	+	-204	-2.40389	-1.09017
scaffold_12	1347533	1348879	84488	+	TRINITY_DN9791_c0_g1_i1	+	-188	-0.480185	-5.31948
scaffold_18	921817	922683	85682	-	TRINITY_DN7904_c0_g1_i1	-	-154	-0.659627	-1.17807
scaffold_10	634579	637005	91786	-	TRINITY_DN12674_c0_g1_i1	+	-453	-1.50557	-2.45264
scaffold_1	4039860	4040450	96686	-	TRINITY_DN9239_c0_g1_i1	-	-141	-1.07189	-1.03757
scaffold_3	1288078	1289290	99654	-	TRINITY_DN9909_c0_g1_i1	-	-179	-0.613886	-4.65864
scaffold_4	196481	198223	100918	+	TRINITY_DN9106_c0_g1_i1	-	-247	-0.435249	-3.57252
scaffold_11	1556353	1559048	109263	+	TRINITY_DN11505_c0_g1_i1	+	-369	-0.24055	-1.19
scaffold_12	457699	459300	109602	+	TRINITY_DN16567_c0_g1_i1	-	-243	-0.176598	-1.6908
scaffold_1	280347	282492	114063	-	TRINITY_DN16493_c0_g1_i1	-	-426	-1.27151	-1.1353
scaffold_3	2441614	2444091	120194	+	TRINITY_DN15288_c0_g1_i1	-	-237	-0.169103	-2.25126
scaffold_4	696621	697428	120915	+	TRINITY_DN16327_c0_g1_i1	+	-226	-0.710146	-1.03209
scaffold_6	2402291	2404039	124807	+	TRINITY_DN3270_c0_g2_i1	+	-120	-0.206366	-1.05812
scaffold_8	721897	724082	126084	-	TRINITY_DN5461_c0_g1_i1	-	-108	-0.0245935	-3.20859
scaffold_2	891907	893092	134730	-	TRINITY_DN6725_c0_g1_i1	-	-192	-0.863688	-1.0341
scaffold_2	3194381	3199464	135329	-	TRINITY_DN6318_c0_g1_i1	-	-50	-0.468271	-1.55288
scaffold_6	889485	890267	137237	-	TRINITY_DN5410_c0_g1_i1	-	-196	-0.314781	-1.21658
scaffold_7	111702	113924	137501	+	TRINITY_DN5664_c0_g1_i1	+	-179	-0.633999	-2.60548
scaffold_14	47998	49486	139557	+	TRINITY_DN11544_c0_g1_i1	+	-77	-1.41012	-1.5547
scaffold_14	933565	934304	139755	+	TRINITY_DN15643_c0_g1_i1	-	-278	-0.381094	-1.2435
scaffold_14	1309774	1311383	139802	-	TRINITY_DN8836_c0_g1_i1	-	-280	-0.180449	-1.5074
scaffold_17	180346	181032	140112	-	TRINITY_DN13250_c0_g1_i1	+	-17	-1.79974	-3.91196
scaffold_21	55211	57220	140570	-	TRINITY_DN8858_c0_g1_i1	-	-52	-0.376537	-1.62346
scaffold_2	747579	749000	141671	+	TRINITY_DN2823_c0_g1_i1	-	-226	-1.38979	-1.32734
scaffold_78	187	1338	148000	-	TRINITY_DN16730_c0_g1_i1	+	-490	-0.236945	-1.76807
scaffold_1	355574	356871	148123	-	TRINITY_DN1331_c0_g1_i1	-	-15	-0.0659718	-1.39797
scaffold_10	1688048	1690596	156620	-	TRINITY_DN6156_c0_g1_i1	+	-201	-1.06072	-1.10508
scaffold_11	926850	928546	156948	-	TRINITY_DN16161_c0_g1_i1	-	-187	-0.51166	-1.3819
scaffold_11	1669073	1670463	157164	-	TRINITY_DN16542_c0_g1_i1	+	-293	-0.166326	-2.15954
scaffold_13	908051	909237	157963	+	TRINITY_DN6421_c0_g1_i1	-	-469	-1.18321	-2.47647
scaffold_18	413541	414616	159631	+	TRINITY_DN6522_c0_g1_i1	-	-358	-1.91287	-3.3969
scaffold_7	1134798	1135579	166004	-	TRINITY_DN8813_c0_g1_i1	+	-321	-0.749314	-1.14118
scaffold_8	459251	461232	166335	+	TRINITY_DN5974_c0_g1_i1	+	-228	-1.90093	-1.19685
scaffold_10	293947	295524	167256	+	TRINITY_DN14454_c0_g1_i1	-	-204	-0.12757	-1.66498
scaffold_20	65942	66592	170071	-	TRINITY_DN5195_c0_g1_i1	-	-123	-0.216582	-1.29523
scaffold_4	414520	421032	51642	+	TRINITY_DN3404_c4_g1_i1	-	-35	0.113987	-1.50254
scaffold_8	1223091	1224011	58544	-	TRINITY_DN6304_c0_g1_i1	+	-486	-1.35851	1.14994
scaffold_8	1775239	1776540	58783	+	TRINITY_DN14581_c0_g1_i1	+	-101	-0.407405	1.37127
scaffold_14	638129	640475	64217	+	TRINITY_DN6469_c0_g1_i1	+	-160	-0.229319	2.91583
scaffold_19	171646	173595	67148	-	TRINITY_DN15860_c0_g1_i1	-	-404	0.660624	-1.3729
scaffold_1	238152	239487	68594	-	TRINITY_DN1833_c0_g1_i1	-	-293	0.381353	-1.07904
scaffold_2	559970	562706	79566	+	TRINITY_DN9973_c0_g1_i1	-	-352	0.213144	-1.0151
scaffold_10	156402	157402	83675	-	TRINITY_DN9931_c0_g1_i1	-	-326	0.509883	-1.18887
scaffold_13	221163	222980	84584	+	TRINITY_DN13283_c0_g1_i1	-	-224	0.523336	-1.90665
scaffold_19	158162	159059	85739	-	TRINITY_DN9800_c0_g1_i1	-	-86	0.565221	-1.58662
scaffold_20	344249	345175	85883	-	TRINITY_DN16267_c0_g1_i1	+	-470	-0.726906	1.81028
scaffold_1	2805195	2807430	86811	+	TRINITY_DN12189_c0_g1_i1	+	-85	-0.178296	1.37926
scaffold_3	1065297	1066044	88282	+	TRINITY_DN6786_c0_g1_i1	-	-385	0.144369	-1.86709
scaffold_10	1269702	1273165	91912	+	TRINITY_DN2003_c1_g1_i1	+	-202	-0.527278	1.52141
scaffold_2	2860576	2863156	98697	-	TRINITY_DN15551_c0_g1_i1	-	-320	0.342189	-1.00839
scaffold_5	898827	900253	102654	+	TRINITY_DN12672_c1_g1_i1	-	-13	0.317348	-1.55474
scaffold_14	1162997	1164890	111433	+	TRINITY_DN9053_c0_g1_i1	-	-213	-0.268676	1.00922
scaffold_16	1009984	1011406	112255	-	TRINITY_DN6412_c0_g1_i1	-	-29	0.460027	-1.95173
scaffold_19	430153	436262	113207	+	TRINITY_DN14064_c0_g1_i1	-	-168	0.109924	-1.45788
scaffold_3	384891	386867	119024	-	TRINITY_DN5709_c0_g1_i1	-	-14	1.40488	-1.65298
scaffold_3	1467771	1468845	119590	+	TRINITY_DN10972_c0_g1_i1	-	-267	0.475254	-2.28488
scaffold_3	3183485	3184582	120606	-	TRINITY_DN16482_c0_g1_i1	+	-158	-0.457255	1.87799
scaffold_6	170807	172652	123715	-	TRINITY_DN16728_c0_g1_i1	-	-451	0.380632	-1.51463
scaffold_6	518161	519602	123937	-	TRINITY_DN13079_c0_g1_i1	+	-124	0.00831275	-1.87724
scaffold_8	1486439	1488004	126365	+	TRINITY_DN3468_c0_g1_i1	-	-216	0.524488	-1.19313
scaffold_10	45698	48028	127584	-	TRINITY_DN12165_c0_g1_i1	+	-48	0.523281	-1.36451
scaffold_11	1432220	1434838	128915	+	TRINITY_DN7223_c0_g1_i1	+	-95	-1.24829	1.47566
scaffold_12	471182	474006	129313	-	TRINITY_DN9648_c0_g1_i1	-	-342	-0.702809	1.3717
scaffold_1	301942	303213	133649	-	TRINITY_DN15914_c0_g1_i1	+	-246	-0.729966	1.94378
scaffold_2	3317742	3318929	135351	-	TRINITY_DN7792_c0_g1_i1	+	-354	0.567484	-1.57735
scaffold_6	921597	923990	137243	-	TRINITY_DN16633_c0_g1_i1	+	-447	0.0941084	-1.3731
scaffold_6	2145479	2146556	137434	-	TRINITY_DN12090_c0_g1_i1	-	-150	0.338116	-1.09012
scaffold_13	466082	468450	139415	+	TRINITY_DN11181_c0_g1_i1	-	-123	0.328197	-1.50001
scaffold_8	1370221	1371415	144997	+	TRINITY_DN15252_c0_g1_i1	-	-60	0.307043	-1.34522
scaffold_8	2025758	2029010	145080	+	TRINITY_DN9049_c0_g1_i1	-	-72	0.328746	-1.39664
scaffold_10	831507	832823	145622	+	TRINITY_DN13775_c0_g1_i1	+	-43	0.132762	-4.13115
scaffold_15	752267	753623	147024	+	TRINITY_DN8685_c0_g1_i1	-	-111	0.714567	-1.13072
scaffold_21	208708	210912	147842	-	TRINITY_DN6197_c0_g1_i1	-	-122	-0.914485	1.98796
scaffold_1	78870	81051	148034	+	TRINITY_DN9790_c0_g1_i1	-	-429	-0.41118	1.71167
scaffold_5	732738	733587	152779	+	TRINITY_DN2625_c0_g1_i1	+	-11	-0.292205	2.444
scaffold_10	1274481	1277561	156504	+	TRINITY_DN14096_c0_g1_i1	+	-442	-0.652786	1.11777
scaffold_4	903958	905138	163923	+	TRINITY_DN15540_c0_g1_i1	+	-74	0.510819	-1.03479
scaffold_4	2668637	2669959	164374	-	TRINITY_DN5547_c0_g1_i1	-	-440	0.126352	-1.88531
scaffold_7	685363	687141	165887	+	TRINITY_DN9816_c0_g1_i1	-	-343	-0.989233	2.54573
scaffold_8	471993	474092	166338	-	TRINITY_DN13504_c0_g1_i1	-	-102	-0.834786	2.70256
scaffold_9	2044956	2046999	167159	-	TRINITY_DN12708_c0_g1_i1	+	-175	-0.13037	1.14655
scaffold_13	202706	204498	168431	+	TRINITY_DN8477_c0_g1_i1	-	-255	0.500877	-1.83891
scaffold_13	504701	506909	168507	+	TRINITY_DN1368_c1_g1_i1	-	-446	-0.0792116	1.45652
scaffold_12	259956	260447	17575	-	TRINITY_DN16512_c0_g1_i1	+	-153	0.345183	1.32561
scaffold_3	1614508	1615299	21818	-	TRINITY_DN16347_c0_g1_i1	+	-8	2.27281	2.22952
scaffold_9	578604	578990	37063	+	TRINITY_DN6466_c0_g1_i1	+	-87	1.40986	1.05418
scaffold_3	2911077	2913135	50909	+	TRINITY_DN8170_c0_g1_i1	+	-68	0.226638	2.6726
scaffold_3	2164291	2166337	51049	-	TRINITY_DN4253_c0_g1_i1	-	-308	0.156636	1.0791
scaffold_4	1758681	1759022	52592	-	TRINITY_DN8940_c0_g1_i1	+	-54	0.82028	1.7954
scaffold_5	2000517	2000952	53947	-	TRINITY_DN6278_c0_g1_i1	-	-146	0.885563	1.14948
scaffold_5	160203	160760	54011	-	TRINITY_DN10643_c0_g1_i1	+	-142	5.98785	5.74811
scaffold_7	1196006	1198375	57073	+	TRINITY_DN8394_c0_g1_i1	-	-78	0.802304	4.57581
scaffold_9	1931384	1932233	59509	+	TRINITY_DN7447_c0_g1_i1	+	-313	0.911463	1.03915
scaffold_14	1001884	1004352	64346	+	TRINITY_DN5623_c0_g1_i1	-	-294	1.53199	1.54986
scaffold_4	1800889	1801760	71749	-	TRINITY_DN5700_c0_g1_i1	+	-267	0.300724	1.12921
scaffold_6	316453	319526	72825	-	TRINITY_DN9231_c0_g1_i1	-	-341	0.0252871	1.06695
scaffold_6	999229	1000210	73002	-	TRINITY_DN6187_c0_g1_i1	-	-67	0.512094	1.09649
scaffold_9	682472	683458	74514	-	TRINITY_DN15442_c0_g1_i1	+	-321	0.101992	1.16596
scaffold_13	200499	201463	76230	-	TRINITY_DN8477_c0_g1_i1	-	-264	0.500877	1.01065
scaffold_13	325773	326536	76265	-	TRINITY_DN15629_c0_g1_i1	-	-206	0.516795	1.2949
scaffold_13	775727	776949	76360	-	TRINITY_DN6092_c0_g1_i1	-	-397	3.49526	3.83546
scaffold_14	412395	414015	76620	-	TRINITY_DN9942_c0_g1_i1	-	-379	1.71175	2.17609
scaffold_14	898417	898927	76744	-	TRINITY_DN13114_c0_g1_i1	-	-119	1.21507	3.63648
scaffold_16	870085	873506	77306	+	TRINITY_DN6637_c0_g1_i1	-	-451	0.063837	1.37471
scaffold_3	838999	840183	80384	-	TRINITY_DN7537_c0_g1_i1	-	-254	0.405468	1.53209
scaffold_12	1110052	1111800	84437	-	TRINITY_DN10286_c0_g1_i1	-	-45	0.467688	3.80144
scaffold_6	249595	251716	90031	+	TRINITY_DN6912_c0_g1_i1	+	-377	1.12803	3.3723
scaffold_9	1495933	1496953	91504	-	TRINITY_DN16147_c0_g1_i1	-	-268	1.63938	2.60857
scaffold_2	1921265	1924080	98130	+	TRINITY_DN6315_c0_g1_i1	+	-7	0.327365	3.32117
scaffold_4	765662	767388	101154	+	TRINITY_DN15044_c0_g1_i1	-	-104	1.48438	2.42273
scaffold_6	555883	557263	104209	-	TRINITY_DN13763_c0_g1_i1	-	-205	1.56923	1.64542
scaffold_17	27034	28898	112319	-	TRINITY_DN12714_c0_g1_i1	+	-429	1.14016	1.14786
scaffold_17	560257	562586	112511	-	TRINITY_DN4753_c0_g1_i1	-	-25	0.280657	1.54091
scaffold_6	351526	356253	123858	+	TRINITY_DN8732_c0_g1_i1	+	-414	0.0823886	2.29886
scaffold_7	498110	499479	125023	-	TRINITY_DN16576_c0_g1_i1	+	-133	0.109641	1.67983
scaffold_8	1464846	1467634	126359	+	TRINITY_DN15919_c0_g1_i1	-	-106	0.107176	2.12485
scaffold_13	1404434	1407032	130409	+	TRINITY_DN15601_c0_g1_i1	+	-210	0.224777	1.81839
scaffold_15	161541	163537	131240	+	TRINITY_DN12130_c0_g1_i1	+	-257	1.48283	1.71266
scaffold_16	1013525	1014476	131925	+	TRINITY_DN4709_c0_g1_i1	-	-259	0.729212	1.88565
scaffold_1	2290447	2292566	134067	-	TRINITY_DN13318_c0_g1_i1	-	-264	0.150752	3.39751
scaffold_4	2102381	2103650	136346	+	TRINITY_DN9173_c0_g1_i1	-	-22	1.11994	1.50522
scaffold_10	1955100	1957065	138853	+	TRINITY_DN6085_c0_g1_i1	-	-244	0.856049	1.23926
scaffold_14	464187	466146	139667	+	TRINITY_DN9794_c0_g1_i1	+	-238	0.432395	1.97861
scaffold_23	29744	31901	140640	+	TRINITY_DN9276_c0_g1_i1	+	-443	0.0430531	1.16585
scaffold_1	3840797	3844779	141444	+	TRINITY_DN5224_c0_g1_i1	+	-220	0.124692	1.22216
scaffold_6	477621	479621	143972	+	TRINITY_DN4715_c0_g1_i1	+	-118	0.361594	1.971
scaffold_7	841182	842757	144499	+	TRINITY_DN8189_c0_g1_i1	+	-291	1.07028	1.19121
scaffold_11	1166157	1168802	145980	-	TRINITY_DN13292_c0_g1_i1	-	-168	0.60336	2.61582
scaffold_1	60750	61306	148028	+	TRINITY_DN6346_c0_g1_i1	+	-273	0.169939	3.00952
scaffold_10	1413621	1415948	156542	+	TRINITY_DN12371_c0_g1_i1	+	-172	0.0871005	1.16775
scaffold_12	100739	102796	157281	+	TRINITY_DN13309_c0_g1_i1	-	-279	0.70074	1.05444
scaffold_2	306039	307362	162055	-	TRINITY_DN8729_c0_g1_i1	-	-88	0.420594	2.59319
scaffold_4	2426891	2428947	164316	+	TRINITY_DN16073_c0_g1_i1	-	-287	0.852702	1.9231
scaffold_4	2931494	2932460	164433	+	TRINITY_DN6605_c0_g1_i1	+	-274	1.06119	1.13251
scaffold_6	954139	956079	165406	+	TRINITY_DN3881_c0_g1_i1	+	-253	0.559199	2.15157
scaffold_6	2030239	2032482	165636	+	TRINITY_DN12504_c0_g1_i1	+	-356	0.740976	1.52043
scaffold_8	758971	760054	166414	+	TRINITY_DN12670_c0_g1_i1	+	-430	0.320082	2.43362
scaffold_9	1774350	1776417	167088	-	TRINITY_DN12559_c0_g1_i1	-	-429	0.44261	1.06092
scaffold_19	728302	731458	170062	+	TRINITY_DN9736_c0_g1_i1	-	-172	0.67274	1.0356

## Sheet: S. lacrymans
scaffold	start	end	Protein ID	gene strand	lncRNA	lncRNA strand	distance	lncRNA_FC	Gene_FC
scaffold_7	846716	848235	349170	+	TRINITY_DN10208_c0_g1_i1	+	-453	0.218643	2.7922			Same expression trend
scaffold_2	894722	896170	365775	-	TRINITY_DN11773_c0_g1_i1	+	-206	0.594812	2.11883			opposite expression trend
scaffold_20	149744	151064	403833	+	TRINITY_DN8724_c1_g1_i1	-	-141	0.782995	1.24896
scaffold_12	928565	931371	410612	+	TRINITY_DN7233_c0_g1_i1	-	-205	1.25612	1.30186
scaffold_1	183414	185809	431618	+	TRINITY_DN9536_c0_g1_i1	+	-482	0.568551	1.16954
scaffold_4	1814440	1817204	446908	-	TRINITY_DN10519_c0_g1_i1	+	-154	0.0337617	1.12541
scaffold_6	174852	178711	448895	-	TRINITY_DN7095_c0_g1_i1	-	-396	0.508646	1.14677
scaffold_6	2636683	2639090	464994	-	TRINITY_DN6849_c0_g1_i1	+	-198	0.0664084	1.3153
scaffold_19	34337	35958	480585	+	TRINITY_DN8137_c0_g1_i1	-	-468	0.0328951	1.36951
scaffold_19	30191	32692	480589	-	TRINITY_DN8137_c0_g1_i1	-	-296	0.0328951	1.75318
scaffold_16	838290	839202	1049846	+	TRINITY_DN8370_c0_g1_i1	-	-23	1.10452	1.31115
scaffold_1	4909359	4911277	1051391	+	TRINITY_DN4916_c0_g1_i1	-	-93	0.0929687	2.18345
scaffold_2	1445239	1446302	1052865	-	TRINITY_DN7175_c0_g1_i1	-	-248	0.207851	1.63529
scaffold_5	1093473	1093951	1056828	+	TRINITY_DN3264_c0_g1_i1	+	-44	0.241108	1.09077
scaffold_5	2023933	2024569	1057327	-	TRINITY_DN3940_c0_g1_i1	+	-100	0.130293	1.19098
scaffold_7	716254	717669	1060256	-	TRINITY_DN11840_c0_g1_i1	+	-298	0.535816	1.04476
scaffold_8	210683	212885	1061586	-	TRINITY_DN4142_c0_g1_i1	-	-269	0.665323	1.13477
scaffold_8	559813	561138	1061766	+	TRINITY_DN3655_c0_g1_i1	+	-410	1.09089	1.01682
scaffold_16	518812	520092	1068100	+	TRINITY_DN11937_c0_g1_i1	+	-243	0.929239	1.22167
scaffold_9	1306897	1310458	1075795	-	TRINITY_DN7207_c0_g1_i1	-	-434	0.344241	2.82924
scaffold_5	647457	648013	1082292	-	TRINITY_DN12004_c0_g1_i1	-	-469	0.20148	4.68734
scaffold_9	1783981	1786111	1085379	+	TRINITY_DN10874_c0_g1_i1	+	-220	0.109984	1.50415
scaffold_3	1087190	1088295	1137443	+	TRINITY_DN10368_c0_g1_i1	-	-420	0.0692547	1.00984
scaffold_12	329290	330506	1154516	-	TRINITY_DN4480_c0_g1_i1	-	-26	0.45798	1.1372
scaffold_14	850372	851031	1156272	-	TRINITY_DN4765_c0_g1_i1	-	-257	1.09456	1.51147
scaffold_7	1912770	1915617	1169697	+	TRINITY_DN5741_c0_g1_i1	+	-437	0.339596	2.12121
scaffold_11	1579819	1582486	1174053	-	TRINITY_DN1614_c0_g1_i1	-	-137	0.59944	3.51204
scaffold_13	1110809	1112188	1175456	-	TRINITY_DN10736_c0_g1_i1	-	-468	0.311187	1.11764
scaffold_2	1542798	1544814	1180224	+	TRINITY_DN4440_c0_g1_i1	-	-378	0.313131	1.19498
scaffold_5	865680	868239	1184386	+	TRINITY_DN10843_c0_g1_i1	-	-235	0.382647	3.15065
scaffold_5	2416927	2420012	1185137	+	TRINITY_DN3566_c0_g1_i1	-	-14	0.4334	2.07338
scaffold_13	1115426	1117472	1194068	-	TRINITY_DN11686_c0_g1_i1	-	-161	0.372062	1.18624
scaffold_16	207599	208547	1195366	+	TRINITY_DN8959_c0_g1_i1	-	-100	0.5964	1.29172
scaffold_9	280004	281632	1204844	-	TRINITY_DN11895_c0_g1_i1	-	-48	0.541776	1.27716
scaffold_9	1922757	1924528	1205322	+	TRINITY_DN9508_c0_g1_i1	-	-173	2.05107	1.74154
scaffold_2	1130795	1132854	1210222	-	TRINITY_DN9231_c0_g1_i1	-	-321	0.412147	2.11305
scaffold_6	662869	664232	1212792	+	TRINITY_DN4331_c0_g1_i1	+	-353	0.994775	1.58532
scaffold_7	2178768	2180551	1213907	+	TRINITY_DN4342_c0_g1_i1	-	-50	0.391714	1.19674
scaffold_14	773690	774560	1216584	+	TRINITY_DN11028_c0_g1_i1	+	-364	0.0478243	1.51311
scaffold_6	2083432	2085677	361086	-	TRINITY_DN11691_c0_g1_i1	+	-188	-0.265624	2.82797
scaffold_6	1136472	1136919	388062	+	TRINITY_DN9520_c0_g1_i1	+	-68	-0.243976	1.48902
scaffold_9	1433688	1437022	416588	-	TRINITY_DN6132_c0_g1_i1	-	-31	0.103294	-2.41715
scaffold_2	2643117	2645111	433191	+	TRINITY_DN7072_c0_g1_i1	+	-200	-0.153385	1.52507
scaffold_2	2590093	2591916	433208	+	TRINITY_DN7188_c0_g1_i1	-	-225	-0.441495	1.44625
scaffold_2	475656	476272	433861	+	TRINITY_DN7168_c0_g1_i1	+	-139	-0.390592	1.0219
scaffold_19	395072	403378	443759	+	TRINITY_DN9634_c0_g1_i1	+	-68	-1.01447	1.32408
scaffold_15	1034147	1035247	453087	-	TRINITY_DN11729_c0_g1_i1	+	-126	-0.801954	1.02005
scaffold_5	2026127	2026915	491499	+	TRINITY_DN9657_c0_g1_i1	-	-245	-0.318366	1.13867
scaffold_2	836704	839075	1052421	+	TRINITY_DN10884_c0_g1_i1	+	-377	-0.734618	1.18227
scaffold_4	701704	704533	1054449	+	TRINITY_DN9534_c0_g1_i1	+	-274	-0.109269	1.14579
scaffold_5	112019	113489	1056249	+	TRINITY_DN9335_c0_g1_i1	+	-374	-0.969138	1.20047
scaffold_8	2454686	2456564	1062812	+	TRINITY_DN6494_c0_g1_i1	+	-359	0.170542	-1.79961
scaffold_11	599711	600569	1065433	-	TRINITY_DN8227_c0_g1_i1	+	-215	0.138134	-2.62875
scaffold_19	73415	74857	1068847	+	TRINITY_DN6556_c0_g1_i1	-	-219	-0.0824622	1.37234
scaffold_6	776088	777300	1073369	+	TRINITY_DN11289_c0_g1_i1	+	-341	0.511951	-1.29343
scaffold_9	985770	986146	1075682	-	TRINITY_DN1841_c0_g1_i2	-	-458	0.838749	-1.12021
scaffold_13	558146	560086	1077573	+	TRINITY_DN4686_c0_g1_i1	+	-301	-0.391029	1.39944
scaffold_15	407523	408818	1078175	-	TRINITY_DN6358_c0_g1_i1	-	-468	0.404075	-1.59296
scaffold_4	1976740	1979228	1081764	-	TRINITY_DN6907_c0_g1_i1	+	-273	-0.0399216	2.42404
scaffold_5	608514	610825	1082274	+	TRINITY_DN7040_c0_g1_i1	-	-454	0.20451	-1.08617
scaffold_13	682982	685204	1086941	+	TRINITY_DN10565_c0_g1_i1	+	-57	-0.522437	2.56229
scaffold_13	1407968	1408936	1087100	+	TRINITY_DN6388_c0_g1_i1	+	-105	0.241262	-1.11244
scaffold_5	1916870	1920005	1091185	+	TRINITY_DN4517_c0_g1_i1	+	-228	0.415037	-2.69453
scaffold_12	834756	835483	1094594	-	TRINITY_DN10828_c0_g1_i1	-	-29	0.0619312	-1.06751
scaffold_6	2324481	2324876	1104006	+	TRINITY_DN8422_c0_g1_i1	+	-98	0.999453	-1.02126
scaffold_14	62336	64736	1113489	+	TRINITY_DN6452_c0_g1_i1	+	-48	1.08759	-1.23292
scaffold_2	398298	398684	1121365	+	TRINITY_DN1523_c0_g2_i1	+	-378	0.137326	-2.88295
scaffold_8	186410	188045	1123992	-	TRINITY_DN5278_c0_g1_i1	-	-328	0.52082	-2.35492
scaffold_8	1852854	1853585	1148827	+	TRINITY_DN4858_c0_g1_i1	+	-430	-0.434973	1.80249
scaffold_13	1240115	1240858	1154992	-	TRINITY_DN11445_c0_g1_i1	+	-438	0.84267	-1.34476
scaffold_15	4555	6281	1156654	+	TRINITY_DN466_c0_g1_i1	+	-182	-0.732106	2.68778
scaffold_1	190007	191695	1159782	+	TRINITY_DN6589_c0_g1_i1	+	-63	0.849264	-1.35361
scaffold_5	354277	355693	1165558	+	TRINITY_DN4588_c0_g1_i1	+	-285	0.335738	-1.52885
scaffold_6	1404113	1404794	1167589	-	TRINITY_DN9490_c0_g1_i1	+	-185	0.552936	-1.27474
scaffold_8	2091921	2094636	1171038	-	TRINITY_DN10851_c0_g1_i1	-	-50	-0.367917	1.25458
scaffold_9	1640216	1642494	1172032	+	TRINITY_DN5021_c0_g1_i1	+	-161	1.06558	-2.11736
scaffold_4	1132285	1133539	1182661	+	TRINITY_DN4897_c0_g1_i1	+	-496	-1.43416	1.37903
scaffold_6	2782636	2783363	1187016	+	TRINITY_DN7419_c0_g1_i1	+	-218	0.175686	-1.55008
scaffold_13	552304	553863	1193828	-	TRINITY_DN5329_c0_g1_i1	+	-422	0.101301	-1.41538
scaffold_2	238089	239020	1198337	-	TRINITY_DN10300_c0_g1_i1	-	-307	0.263362	-3.58705
scaffold_16	158041	158686	1208224	+	TRINITY_DN9687_c0_g1_i1	+	-149	-0.336607	1.16657
scaffold_2	470353	474312	1210055	+	TRINITY_DN6491_c0_g1_i1	+	-263	-0.219016	1.01189
scaffold_11	594674	595332	1215512	-	TRINITY_DN4709_c0_g1_i1	-	-324	0.174107	-1.32721
scaffold_15	384049	385793	1216745	-	TRINITY_DN11444_c0_g1_i1	+	-122	-0.844787	1.2336
scaffold_16	371629	373213	358522	-	TRINITY_DN5817_c0_g1_i1	-	-144	-0.219698	-1.15376
scaffold_11	1089182	1090046	417169	-	TRINITY_DN5047_c0_g1_i1	-	-336	-0.103383	-1.97727
scaffold_17	796086	796837	443431	-	TRINITY_DN4887_c0_g1_i1	-	-60	-0.0256619	-1.40713
scaffold_3	170176	170750	1043150	+	TRINITY_DN9450_c0_g1_i1	+	-230	-0.123629	-3.10842
scaffold_5	562588	564009	1044607	-	TRINITY_DN9461_c0_g1_i1	+	-13	-0.891215	-1.24991
scaffold_5	926977	927472	1044691	-	TRINITY_DN4275_c0_g1_i1	-	-220	-0.0805129	-1.05891
scaffold_7	2393613	2396213	1046538	-	TRINITY_DN6802_c0_g1_i1	+	-398	-1.21522	-1.24459
scaffold_15	411455	413373	1049472	+	TRINITY_DN6905_c0_g1_i1	+	-317	-0.602226	-2.42808
scaffold_2	83026	83897	1052033	-	TRINITY_DN3121_c0_g1_i1	+	-224	-1.36786	-1.92397
scaffold_5	767290	767850	1056647	-	TRINITY_DN4225_c0_g1_i1	+	-402	-1.78062	-1.83644
scaffold_6	2485817	2487385	1059462	-	TRINITY_DN9142_c0_g1_i1	+	-198	-0.437848	-1.56834
scaffold_7	1615827	1616932	1060853	+	TRINITY_DN4851_c0_g1_i1	-	-135	-0.365688	-1.23205
scaffold_8	2189031	2189652	1062653	+	TRINITY_DN11998_c0_g1_i1	+	-356	-1.80451	-2.03847
scaffold_9	1106803	1107483	1063445	+	TRINITY_DN8269_c0_g1_i1	+	-330	-1.34986	-1.41715
scaffold_10	1227656	1228903	1064731	+	TRINITY_DN7192_c0_g1_i1	+	-226	-0.47098	-1.18766
scaffold_12	382280	383512	1066421	+	TRINITY_DN2945_c0_g1_i1	+	-117	-0.86153	-1.05247
scaffold_5	604288	604659	1072523	+	TRINITY_DN6221_c0_g1_i1	+	-162	-1.20385	-1.20847
scaffold_5	672408	672934	1072547	-	TRINITY_DN8082_c0_g1_i1	-	-164	-0.635798	-4.3576
scaffold_13	1176509	1176825	1077725	+	TRINITY_DN6323_c0_g1_i1	+	-165	-0.951021	-3.35975
scaffold_15	678277	679394	1078258	+	TRINITY_DN11848_c0_g1_i1	+	-199	-0.831062	-1.58973
scaffold_11	960630	961424	1086178	-	TRINITY_DN6296_c0_g1_i1	-	-421	-0.286395	-1.22055
scaffold_2	2232875	2235582	1089384	+	TRINITY_DN4876_c0_g1_i1	+	-451	-0.0819518	-2.67304
scaffold_2	2073759	2074640	1120900	+	TRINITY_DN5032_c0_g1_i1	-	-25	-0.630738	-2.05342
scaffold_1	5355910	5357353	1134919	+	TRINITY_DN7250_c0_g1_i1	+	-121	-0.404719	-1.04383
scaffold_11	1614526	1616622	1153309	+	TRINITY_DN4355_c0_g1_i1	-	-133	-0.551462	-1.70503
scaffold_19	574528	575779	1158763	+	TRINITY_DN10607_c0_g1_i1	+	-113	-0.786336	-1.25258
scaffold_20	159007	160734	1159195	+	TRINITY_DN5774_c0_g1_i1	-	-473	-0.412085	-1.03613
scaffold_21	144531	146794	1159384	+	TRINITY_DN661_c0_g1_i1	+	-457	-0.172039	-1.00543
scaffold_6	2204786	2205825	1202861	+	TRINITY_DN11370_c0_g1_i1	-	-88	-1.38332	-1.56216
scaffold_10	1226185	1226768	1205766	-	TRINITY_DN7192_c0_g1_i1	+	-205	-0.47098	-2.31106
scaffold_15	531585	532586	1208006	+	TRINITY_DN11021_c0_g1_i1	-	-221	-0.029944	-1.46718
scaffold_17	563991	565912	1208641	+	TRINITY_DN7156_c0_g1_i1	-	-447	-0.102005	-1.44859
scaffold_2	215450	216482	1210017	-	TRINITY_DN4073_c0_g1_i1	+	-35	-0.679018	-2.2045
scaffold_5	577792	580670	1212115	+	TRINITY_DN4455_c0_g1_i1	+	-339	-0.301167	-1.2577
scaffold_7	2347937	2348699	1213941	+	TRINITY_DN10840_c0_g1_i1	-	-4	-0.936621	-2.24173
scaffold_8	804854	807118	1214204	+	TRINITY_DN5018_c0_g1_i1	+	-444	-0.668983	-1.19846
